# Supplementary material for: A Rapid Review on the Influence of COVID-19 Lockdown and Quarantine Measures on Modifiable Cardiovascular Risk Factors in the General Population
Source: Int J Environ Res Public Health. 2021 Aug 13;18(16):8567. doi: 10.3390/ijerph18168567 (PMC8393482; doi:10.3390/ijerph18168567)
Supplement: Supplementary file 1 [file ijerph-18-08567-s001.zip › ijerph-1300479-supplementary.pdf]

# TABLE OF CONTENTS

|                                                                                                          |    |
|----------------------------------------------------------------------------------------------------------|----|
| Table of contents.....                                                                                   | 1  |
| S1 Methods.....                                                                                          | 2  |
| S1.1 Search strings.....                                                                                 | 2  |
| S2 Results.....                                                                                          | 4  |
| S2.1 Excluded studies .....                                                                              | 4  |
| S2.1.1 Studies about patient cohorts (not reported within this paper).....                               | 4  |
| S2.1.2 Excluded Fulltexts – Reason: Topically relevant study, but using non-probabilistic sampling ..... | 6  |
| S2.1.3 Excluded Fulltexts – Reason: Study design.....                                                    | 18 |
| S2.1.4 Excluded Fulltexts – Reason: Missing reference values .....                                       | 22 |
| S2.1.5 Excluded Fulltexts – Reason: Unclear recruitment procedure.....                                   | 25 |
| S2.1.6 Excluded Fulltexts – Reason: Outcome .....                                                        | 27 |
| S2.1.7 Excluded Fulltexts – Reason: Language.....                                                        | 29 |
| S2.1.8 Excluded Fulltexts – Reason: Population.....                                                      | 30 |
| S2.1.9 Excluded Fulltexts – Reason: Double publication.....                                              | 31 |
| S2.2 Results of data extraction .....                                                                    | 32 |

## S1 METHODS

### S1.1 SEARCH STRINGS

**Table S1: Search string Pubmed**

| # | Search terms                                                                                                                                                                                                                                                                                                                                                                                                                                                                                                                                                                                                                                                                                                                                                                                                                                                                                                                                                                                                                                                                                                                                                |
|---|-------------------------------------------------------------------------------------------------------------------------------------------------------------------------------------------------------------------------------------------------------------------------------------------------------------------------------------------------------------------------------------------------------------------------------------------------------------------------------------------------------------------------------------------------------------------------------------------------------------------------------------------------------------------------------------------------------------------------------------------------------------------------------------------------------------------------------------------------------------------------------------------------------------------------------------------------------------------------------------------------------------------------------------------------------------------------------------------------------------------------------------------------------------|
| 1 | (coronavirus OR "corona virus" OR coronavirinae OR coronaviridae OR betacoronavirus OR covid19 OR "covid 19" OR nCoV OR "CoV 2" OR CoV2 OR sarscov2 OR 2019nCoV OR "novel CoV" OR "wuhan virus") OR ((wuhan OR hubei OR huanan) AND ("severe acute respiratory" OR pneumonia) AND (outbreak)) OR "Coronavirus"[Mesh] OR "Coronavirus Infections"[Mesh] OR "COVID-19" [Supplementary Concept] OR "severe acute respiratory syndrome coronavirus 2" [Supplementary Concept] OR "Betacoronavirus"[Mesh]                                                                                                                                                                                                                                                                                                                                                                                                                                                                                                                                                                                                                                                        |
| 2 | "social isolation"[tw] OR "physical isolation"[tw] OR self-isolation[tw] OR "patient isolation"[tw] OR "social isolation"[mh] OR quarantine[tw] OR self-quarantine[tw] OR quarantine[mh] OR "social distancing"[tw] OR "physical distancing"[tw] OR lockdown[tw] OR "lock down"[tw] OR shutdown[tw] OR "shut down"[tw] OR "home confinement"[tw] OR "house arrest"[tw] OR loneliness[tw] OR loneliness[mh]                                                                                                                                                                                                                                                                                                                                                                                                                                                                                                                                                                                                                                                                                                                                                  |
| 3 | sedentary[tw] OR "sedentary behavior"[mh] OR "physical inactivity"[tw] OR "physical education and training"[mh] OR "physical training"[tw] OR "physical activity"[tw] OR "physical lifestyle"[tw] OR "physical education"[tw] OR exercis*[tw] OR exercise[mh] OR sport*[tw] OR sports[mh] OR fitness[tw] OR "physical fitness"[mh] OR exert*[tw] OR endure*[tw] OR aerobic*[tw] OR aliment*[tw]<br>OR<br>diet*[tw] OR diet[mh] OR eat[tw] OR eating[tw] OR eating[mh] OR fare[tw] OR feed*[tw] OR food*[tw] OR food[mh] OR nourishment*[tw] OR nutrit*[tw] OR "nutritional status"[mh]<br>OR<br>adipos*[tw] OR adiposity[mh] OR bodyweight[tw] OR "body weight"[tw] OR "body weight"[mh] OR obes*[tw] OR obesity[mh] OR overweight[tw] OR overweight[mh] OR weight*[tw]<br>OR<br>tobacco[tw] OR tobacco[mh] OR smok*[tw] OR smoking[mh] OR cigarette[tw] OR cigarettes[tw] OR "tobacco products"[mh] OR nicotine[tw] OR nicotine[tw]<br>OR<br>wine*[tw] OR liquor*[tw] OR spirits[tw] OR beer*[tw] OR alcohol*[tw] OR drink*[tw] OR "Alcohol-Related Disorders"[mh] OR "alcohol drinking"[mh] OR "drinking behavior"[mh] OR "alcoholic beverages"[mh]<br>OR |

|   |                                                                                                                                                                                                                                                                                                                                                                                                                                                                                                                                                                                                                                                                                                                                                                                                                                                                                                                                                                                                                                                                                                                     |
|---|---------------------------------------------------------------------------------------------------------------------------------------------------------------------------------------------------------------------------------------------------------------------------------------------------------------------------------------------------------------------------------------------------------------------------------------------------------------------------------------------------------------------------------------------------------------------------------------------------------------------------------------------------------------------------------------------------------------------------------------------------------------------------------------------------------------------------------------------------------------------------------------------------------------------------------------------------------------------------------------------------------------------------------------------------------------------------------------------------------------------|
|   | "cardiovascular diseases"[mh] OR cardiovascular[tw] OR cardia*[tw] OR heart*[tw] OR coronary*[tw] OR angina*[tw] OR ventric*[tw] OR myocard*[tw] OR pericard*[tw] OR ischem*[tw] OR ischaem*[tw] OR emboli*[tw] OR arrhythmi*[tw] OR thrombos*[tw] OR thromboc*[tw] OR thrombop*[tw] OR atrial fibrillat*[tw] OR tachycardia*[tw] OR endocardi*[tw] OR "sick sinus"[tw] OR "cerebrovascular disorders"[mh] OR stroke[tw] OR strokes[tw] OR cerebrovasc*[tw] OR "cerebral vascular"[tw] OR apoplexy[tw] OR "brain accident"[tw] OR ((brain*[tw] OR cerebral[tw] OR lacunar[tw]) AND infarct*[tw]) OR "hypertension"[mh] OR hypertensi*[tw] OR "peripheral arterial disease"[tw] OR ((high[tw] OR increased[tw] OR elevated[tw]) AND "blood pressure"[tw]) OR "hyperlipidemias"[mh] OR hyperlipid*[tw] OR hyperlipidemia*[tw] OR hyperlipidaemia*[tw] OR hypercholesterol*[tw] OR hypercholesterolemia*[tw] OR hyperlipoproteinemia*[tw] OR hypertriglyceridemia*[tw] OR "arteriosclerosis"[mh] OR "cholesterol"[mh] OR cholesterol[tw] OR "coronary risk factor"[tw] OR "blood pressure"[mh] OR "blood pressure"[tw] |
| 4 | #1 AND #2 AND #3                                                                                                                                                                                                                                                                                                                                                                                                                                                                                                                                                                                                                                                                                                                                                                                                                                                                                                                                                                                                                                                                                                    |

**Table S2: Search string EMBASE**

| #  | Search terms                                                                                                                                                                                                                                                                                                                                                                                                                                                                                                                                                                                                                                                                                                                                                                                                                                                                                                                                                                                |
|----|---------------------------------------------------------------------------------------------------------------------------------------------------------------------------------------------------------------------------------------------------------------------------------------------------------------------------------------------------------------------------------------------------------------------------------------------------------------------------------------------------------------------------------------------------------------------------------------------------------------------------------------------------------------------------------------------------------------------------------------------------------------------------------------------------------------------------------------------------------------------------------------------------------------------------------------------------------------------------------------------|
| 1  | (coronavir* OR corona virus* OR betacoronavir* OR covid19 OR covid 19 OR nCoV OR CoV 2 OR CoV2 OR sarscov2 OR 2019nCoV OR 2019 novel coronavirus* OR 2019 novel CoV OR wuhan virus*).mp. OR ((wuhan OR hubei OR huanan) AND (severe acute respiratory OR pneumonia*) AND outbreak*).mp.                                                                                                                                                                                                                                                                                                                                                                                                                                                                                                                                                                                                                                                                                                     |
| 2  | social isolation.tw. or physical isolation.tw. or self-isolation.tw. or patient isolation.tw. or exp social isolation/ or exp patient isolation/ or exp isolation/ or exp isolation facility/ or quarantine.tw. or self-quarantine.tw. or exp quarantine/ or social distancing.tw. or physical distancing.tw. or lockdown.tw. or lock down.tw. or shutdown.tw. or shut down.tw. or home confinement.tw. or house arrest.tw. or loneliness.tw. or exp loneliness/                                                                                                                                                                                                                                                                                                                                                                                                                                                                                                                            |
| 3  | sedentary.tw. or exp sedentary lifestyle/ or physical inactivity.tw. or exp physical inactivity/ or physical training.tw. or exp training/ or physical activity.tw. or exp physical activity/ or physical lifestyle.tw. or physical education.tw. or exercise*.tw. or exp exercise/ or sport*.tw. or exp sport/ or fitness.tw. or exp fitness/ or exert*.tw. or exp endurance/ or aerobic*.tw.                                                                                                                                                                                                                                                                                                                                                                                                                                                                                                                                                                                              |
| 4  | aliment*.tw. or diet*.tw. or exp diet/ or eat*.tw. or exp eating/ or fare.tw. or feed*.tw. or food*.tw. or exp food/ or nourishment*.tw. or nutrit*.tw. or exp nutrition/                                                                                                                                                                                                                                                                                                                                                                                                                                                                                                                                                                                                                                                                                                                                                                                                                   |
| 5  | adipos*.tw. or bodyweight.tw. or body weight.tw. or exp body weight/ or obes*.tw. or exp obesity/ or overweight.tw. or weight*.tw.                                                                                                                                                                                                                                                                                                                                                                                                                                                                                                                                                                                                                                                                                                                                                                                                                                                          |
| 6  | tobacco.tw. or exp tobacco/ or smok*.tw. or exp smoking/ or cigarette.tw. or exp cigarette/ or nicotine.tw. or exp nicotine/                                                                                                                                                                                                                                                                                                                                                                                                                                                                                                                                                                                                                                                                                                                                                                                                                                                                |
| 7  | wine*.tw. or liquor*.tw. or spirits.tw. or beer*.tw. or alcohol*.tw. or drink*.tw. or exp drinking behaviour/ or exp alcohol consumption/ or exp alcoholism/ or exp alcoholic beverage/                                                                                                                                                                                                                                                                                                                                                                                                                                                                                                                                                                                                                                                                                                                                                                                                     |
| 8  | exp cardiovascular disease/ or cardio*.tw. or cardia*.tw. or heart*.tw. or coronary*.tw. or angina*.tw. or ventric*.tw. or myocard*.tw. or pericard*.tw. or isch?em*.tw. or emboli*.tw. or arrhythmi*.tw. or thrombo*.tw. or atrial fibrillat*.tw. or tachycardi*.tw. or endocardi*.tw. or (sick adj sinus).tw. or exp cerebrovascular disease/ or (stroke or strokes).tw. or cerebrovasc*.tw. or cerebral vascular.tw. or apoplexy.tw. or (brain adj2 accident*).tw. or ((brain* or cerebral or lacunar) adj2 infarct*).tw. or exp hypertension/ or hypertensi*.tw. or peripheral arter* disease*.tw. or ((high or increased or elevated) adj2 blood pressure).tw. or exp hyperlipidemia/ or hyperlipid*.tw. or hyperlip?emia*.tw. or hypercholesterol*.tw. or hypercholester?emia*.tw. or hyperlipoprotein?emia*.tw. or hypertriglycerid?emia*.tw. or exp Arteriosclerosis/ or exp Cholesterol/ or cholesterol.tw. or "coronary risk factor".tw. or Blood Pressure/ or blood pressure.tw. |
| 9  | or/3-8                                                                                                                                                                                                                                                                                                                                                                                                                                                                                                                                                                                                                                                                                                                                                                                                                                                                                                                                                                                      |
| 10 | 1 and 2 and 9                                                                                                                                                                                                                                                                                                                                                                                                                                                                                                                                                                                                                                                                                                                                                                                                                                                                                                                                                                               |

## S2 RESULTS

### S2.1 EXCLUDED STUDIES

#### S2.1.1 STUDIES ABOUT PATIENT COHORTS (NOT REPORTED WITHIN THIS PAPER)

| Study                       | Reference                                                                                                                                                                                                                                                                                                                                                                 |
|-----------------------------|---------------------------------------------------------------------------------------------------------------------------------------------------------------------------------------------------------------------------------------------------------------------------------------------------------------------------------------------------------------------------|
| Ahmed, 2020                 | Ahmed HO. The impact of social distancing and self-isolation in the last corona COVID-19 outbreak on the body weight in Sulaimani governorate- Kurdistan/Iraq, a prospective case series study. <i>Ann Med Surg (Lond)</i> . 2020 Nov;59:110-117. doi: 10.1016/j.amsu.2020.09.024.                                                                                        |
| Albert et al., 2021         | Albert U, Losurdo P, Leschiutta A, Macchi S, Samardzic N, Casaganda B, de Manzini N, Palmisano S. Effect of SARS-CoV-2 (COVID-19) Pandemic and Lockdown on Body Weight, Maladaptive Eating Habits, Anxiety, and Depression in a Bariatric Surgery Waiting List Cohort. <i>Obes Surg</i> . 2021 May;31(5):1905-1911. doi: 10.1007/s11695-021-05257-5.                      |
| Berard et al., 2021         | Berard M, Rattaz C, Peries M, Loubersac J, Munir K, Baghdadi A. Impact of containment and mitigation measures on children and youth with ASD during the COVID-19 pandemic: Report from the ELENA cohort. <i>J Psychiatr Res</i> . 2021 May;137:73-80. doi: 10.1016/j.jpsychires.2021.02.041.                                                                              |
| Biancalana et al., 2021     | Biancalana E, Parolini F, Mengozzi A, Solini A. Short-term impact of COVID-19 lockdown on metabolic control of patients with well-controlled type 2 diabetes: a single-centre observational study. <i>Acta Diabetol</i> . 2021 Apr;58(4):431-436. doi: 10.1007/s00592-020-01637-y.                                                                                        |
| Caruso et al., 2020         | Caruso I, Di Molfetta S, Guarini F, Giordano F, Cignarelli A, Natalicchio A, Perrini S, Leonardini A, Giorgino F, Laviola L. Reduction of hypoglycaemia, lifestyle modifications and psychological distress during lockdown following SARS-CoV-2 outbreak in type 1 diabetes. <i>Diabetes Metab Res Rev</i> . 2020 Sep 11:e3404. doi: 10.1002/dmrr.3404.                  |
| Chagué et al., 2020         | Chagué F, Boulin M, Eicher JC, Bichat F, Saint Jalmes M, Cransac-Miet A, Soudry-Faure A, Danchin N, Cottin Y, Zeller M. Impact of lockdown on patients with congestive heart failure during the coronavirus disease 2019 pandemic. <i>ESC Heart Fail</i> . 2020 Sep 30;7(6):4420-3. doi: 10.1002/ehf2.13016.                                                              |
| Christoforidis et al., 2020 | Christoforidis A, Kavoura E, Nemtsa A, Pappa K, Dimitriadou M. Coronavirus lockdown effect on type 1 diabetes management on children wearing insulin pump equipped with continuous glucose monitoring system. <i>Diabetes Res Clin Pract</i> . 2020 Aug;166:108307. doi: 10.1016/j.diabres.2020.108307.                                                                   |
| Cirillo et al., 2021        | Cirillo M, Rizzello F, Badolato L, De Angelis D, Evangelisti P, Coccia ME, Fatini C. The effects of COVID-19 lockdown on lifestyle and emotional state in women undergoing assisted reproductive technology: Results of an Italian survey. <i>J Gynecol Obstet Hum Reprod</i> . 2021 Feb 2;50(8):102079. doi: 10.1016/j.jogoh.2021.102079.                                |
| Cognigni et al., 2021       | Cognigni M, D'Agostin M, Schiulaz I, Giangreco M, Carletti C, Faleschini E, Barbi E, Tornese G. HbA1c and BMI after lockdown for COVID-19 in children and adolescents with type 1 diabetes mellitus. <i>Acta Paediatr</i> . 2021 Mar 11. doi: 10.1111/apa.15838.                                                                                                          |
| Cransac-Miet et al., 2021   | Cransac-Miet A, Zeller M, Chagué F, Faure AS, Bichat F, Danchin N, Boulin M, Cottin Y. Impact of COVID-19 lockdown on lifestyle adherence in stay-at-home patients with chronic coronary syndromes: Towards a time bomb. <i>Int J Cardiol</i> . 2021 Jan 15;323:285-287. doi: 10.1016/j.ijcard.2020.08.094.                                                               |
| Da Silva et al., 2021       | Silva, Jean & Verlengia, Rozangela & Oliveira, José & Ribeiro, Anna & Barbosa, Carolina & Sbeguen Stotzer, Uliana & Crisp, Alex. (2020). Associations between sociodemographic factors and physical activity and sedentary behaviors in adults with chronic diseases during COVID-19 pandemic. <i>Sports Medicine and Health Science</i> . 2. 10.1016/j.smhs.2020.11.002. |
| De Luis et al., 2020        | de Luis Román DA, Izaola O, Primo Martín D, Gómez Hoyos E, Torres Torres B, López Gómez JJ. Effect of lockdown for COVID-19 on self-reported body weight gain in a sample of obese patients. <i>Nutr Hosp</i> . 2020 Dec 16;37(6):1232-1237. English. doi: 10.20960/nh.03307.                                                                                             |
| De Luis et al., 2021        | de Luis D, Izaola O, Primo D, Gómez E, Torres B, Gómez JLL, Pacheco D. Factors Related to Weight Gain in Subjects with Sleeve Gastrectomy During Lockdown by the COVID-19 Pandemic. <i>Obes Surg</i> . 2021 May;31(5):2197-2202. doi: 10.1007/s11695-021-05253-9.                                                                                                         |
| Di Stefano et al., 2021     | Di Stefano V, Battaglia G, Giustino V, Gagliardo A, D'Aleo M, Giannini O, Palma A, Brighina F. Significant reduction of physical activity in patients with neuromuscular disease during COVID-19 pandemic: the long-term consequences of quarantine. <i>J Neurol</i> . 2021 Jan;268(1):20-26. doi: 10.1007/s00415-020-10064-6.                                            |
| Endstrasser et al., 2020    | Endstrasser F, Braito M, Linser M, Spicher A, Wagner M, Brunner A. The negative impact of the COVID-19 lockdown on pain and physical function in patients with end-stage hip or knee osteoarthritis. <i>Knee Surg Sports Traumatol Arthrosc</i> . 2020 Aug;28(8):2435-2443. doi: 10.1007/s00167-020-06104-3.                                                              |
| Falcetta et al., 2021       | Falcetta P, Aragona M, Ciccarone A, Bertolotto A, Campi F, Coppelli A, Dardano A, Giannarelli R, Bianchi C, Del Prato S. Impact of COVID-19 lockdown on glucose control of elderly people with type 2 diabetes in Italy. <i>Diabetes Res Clin Pract</i> . 2021 Mar 17;174:108750. doi: 10.1016/j.diabres.2021.108750.                                                     |
| Félix et al., 2021          | Félix S, de Lourdes M, Ribeiro I, Cunha B, Ramalho S, Vaz AR, Machado PPP, Conceição E. A preliminary study on the psychosocial impact of COVID-19 lockdown in post-bariatric surgery women: the importance of eating behavior, health care access, and social support. <i>Curr Psychol</i> . 2021 Feb 28;1-7. doi: 10.1007/s12144-021-01529-6.                           |
| Ghesquière et al., 2021     | Ghesquière L, Garabedian C, Drumez E, Lemaître M, Cazaubiel M, Bengler C, Vambergue A. Effects of COVID-19 pandemic lockdown on gestational diabetes mellitus: A retrospective study. <i>Diabetes Metab</i> . 2021 Mar;47(2):101201. doi: 10.1016/j.diabet.2020.09.008.                                                                                                   |

| Study                       | Reference                                                                                                                                                                                                                                                                                                                                                                                              |
|-----------------------------|--------------------------------------------------------------------------------------------------------------------------------------------------------------------------------------------------------------------------------------------------------------------------------------------------------------------------------------------------------------------------------------------------------|
| Han et al., 2021            | Han, Maggie & Preciado, Priscila & Thwin, Ohnmar & Tao, Xia & Tapia-Silva, Leticia & Fuentes, Lemuel & Hakim, Mohamad & Patel, Amrish & Tisdale, Lela & Zhang, Hanjie & Kotanko, Peter. (2021). Effect of Statewide Lockdown in Response to COVID-19 Pandemic on Physical Activity Levels of Hemodialysis Patients. Blood Purification. 1-8. 10.1159/000514935.                                        |
| Jimenez et al. 2021         | Jimenez A, de Hollanda A, Palou E, Ortega E, Andreu A, Molero J, Mestre C, Ibarzabal A, Obach A, Flores L, Cañizares S, Balibrea JM, Vidal J, Escarrabill J, Moize V. Psychosocial, Lifestyle, and Body Weight Impact of COVID-19-Related Lockdown in a Sample of Participants with Current or Past History of Obesity in Spain. Obes Surg. 2021 May;31(5):2115-2124. doi: 10.1007/s11695-021-05225-z. |
| Kang et al., 2021           | Kang HM, Jeong DC, Suh BK, Ahn MB. The Impact of the Coronavirus Disease-2019 Pandemic on Childhood Obesity and Vitamin D Status. J Korean Med Sci. 2021 Jan 18;36(3):e21. doi: 10.3346/jkms.2021.36.e21.                                                                                                                                                                                              |
| Karatas et al., 2021        | Karatas S, Yesim T, Beyse S. Impact of lockdown COVID-19 on metabolic control in type 2 diabetes mellitus and healthy people. Prim Care Diabetes. 2021 Jan 9:S1751-9918(21)00003-6. doi: 10.1016/j.pcd.2021.01.003.                                                                                                                                                                                    |
| Marchitelli et al., 2020    | Marchitelli S, Mazza C, Lenzi A, Ricci E, Gnessi L, Roma P. Weight Gain in a Sample of Patients Affected by Overweight/Obesity with and without a Psychiatric Diagnosis during the Covid-19 Lockdown. Nutrients. 2020 Nov 16;12(11):3525. doi: 10.3390/nu12113525.                                                                                                                                     |
| Mulugeta et al., 2021       | Mulugeta, Wudeneh & Hoque, Laboni. (2021). Impact of the COVID-19 lockdown on weight status and associated factors for obesity among Children in Massachusetts. Obesity Medicine. 22. 100325. 10.1016/j.obmed.2021.100325.                                                                                                                                                                             |
| Palladino et al., 2020      | Palladino F, Merolla E, Solimeno M, de Leva MF, Lenta S, Di Mita O, Bonadies A, Striano P, Tipo V, Varone A. Is Covid-19 lockdown related to an increase of accesses for seizures in the emergency department? An observational analysis of a paediatric cohort in the Southern Italy. Neurol Sci. 2020 Dec;41(12):3475-3483. doi: 10.1007/s10072-020-04824-5.                                         |
| Pellegrini et al., 2020     | Pellegrini M, Ponzo V, Rosato V, Scumaci E, Goitre I, Benso A, Belcastro S, Crespi C, De Micheli F, Ghigo E, Broglio F, Bo S. Changes in Weight and Nutritional Habits in Adults with Obesity during the "Lockdown" Period Caused by the COVID-19 Virus Emergency. Nutrients. 2020 Jul 7;12(7):2016. doi: 10.3390/nu12072016.                                                                          |
| Psoma et al., 2020          | Psoma O, Papachristoforou E, Kountouri A, Balampanis K, Stergiou A, Lambadiari V, Liatis S, Tsimihodimos V. Effect of COVID-19-associated lockdown on the metabolic control of patients with type 2 diabetes. J Diabetes Complications. 2020 Dec;34(12):107756. doi: 10.1016/j.jdiacomp.2020.107756.                                                                                                   |
| Ruissen et al., 2021        | Ruissen MM, Regeer H, Landstra CP, Schroijen M, Jazet I, Nijhoff MF, Pijl H, Ballieux BEPB, Dekkers O, Huisman SD, de Koning EJP. Increased stress, weight gain and less exercise in relation to glycemic control in people with type 1 and type 2 diabetes during the COVID-19 pandemic. BMJ Open Diabetes Res Care. 2021 Jan;9(1):e002035. doi: 10.1136/bmjdr-2020-002035.                           |
| Ruiz-Roso et al., 2020      | Ruiz-Roso MB, Knott-Torcal C, Matilla-Escalante DC, Garcimartín A, Sampedro-Núñez MA, Dávalos A, Marazuela M. COVID-19 Lockdown and Changes of the Dietary Pattern and Physical Activity Habits in a Cohort of Patients with Type 2 Diabetes Mellitus. Nutrients. 2020 Aug 4;12(8):2327. doi: 10.3390/nu12082327.                                                                                      |
| Sanchez-Larsen et al., 2020 | Sanchez-Larsen A, Gonzalez-Villar E, Diaz-Maroto I, Layos-Romero A, Martínez-Martín A, Alcahut-Rodríguez C, Grande-Martin A, Sopelana-Garay D. Influence of the COVID-19 outbreak in people with epilepsy: Analysis of a Spanish population (EPICOVID registry). Epilepsy Behav. 2020 Nov;112:107396. doi: 10.1016/j.yebeh.2020.107396.                                                                |
| Schirinzi et al., 2020      | Schirinzi T, Di Lazzaro G, Salimei C, Cerroni R, Liguori C, Scalise S, Alwardat M, Mercuri NB, Pierantozzi M, Stefani A, Pisani A. Physical activity changes and correlate effects in patients with Parkinson's disease during COVID-19 lockdown. Mov Disord Clin Pract. 2020 Jul 17;7(7):797–802. doi: 10.1002/mdc3.13026.                                                                            |
| Shah et al., 2020           | Shah N, Kargupikar M, Bhor S, Ladkat D, Khadilkar V, Khadilkar A. Impact of lockdown for COVID-19 pandemic in Indian children and youth with type 1 diabetes from different socio-economic classes. J Pediatr Endocrinol Metab. 2020 Nov 13;34(2):217-223. doi: 10.1515/jpem-2020-0460.                                                                                                                |
| Sharma et al., 2020         | Sharma P, Ebbert JO, Rosedahl JK, Philpot LM. Changes in substance use among young adults during a respiratory disease pandemic. SAGE Open Med. 2020 Oct 14;8:2050312120965321. doi: 10.1177/2050312120965321.                                                                                                                                                                                         |
| Suzuki et al., 2020         | Suzuki Y, Maeda N, Hirado D, Shirakawa T, Urabe Y. Physical Activity Changes and Its Risk Factors among Community-Dwelling Japanese Older Adults during the COVID-19 Epidemic: Associations with Subjective Well-Being and Health-Related Quality of Life. Int J Environ Res Public Health. 2020 Sep 10;17(18):6591. doi: 10.3390/ijerph17186591.                                                      |
| Tornese et al., 2020        | Tornese G, Ceconi V, Monasta L, Carletti C, Faleschini E, Barbi E. Glycemic Control in Type 1 Diabetes Mellitus During COVID-19 Quarantine and the Role of In-Home Physical Activity. Diabetes Technol Ther. 2020 Jun;22(6):462-467. doi: 10.1089/dia.2020.0169.                                                                                                                                       |
| Veeraiah et al., 2021       | Veeraiah S, Sudhakar R, Tripathy JP, Sankar D, Usharani A, Ramakrishnan S, Selvam J, Nagarajan G, Prabhakar DS, Swaminathan R. Tobacco use and quitting behaviour during COVID-19 lockdown. Int J Tuberc Lung Dis. 2021 Mar 1;25(3):247-249. doi: 10.5588/ijtld.20.0728.                                                                                                                               |

### S2.1.2 EXCLUDED FULLTEXTS – REASON: TOPICALLY RELEVANT STUDY, BUT USING NON-PROBABILISTIC SAMPLING

| Study              | Reference                                                                                                                                                                                                              |
|--------------------|------------------------------------------------------------------------------------------------------------------------------------------------------------------------------------------------------------------------|
| Adams et al., 2020 | Adams EL, Caccavale LJ, Smith D, Bean MK. Food Insecurity, the Home Food Environment, and Parent Feeding Practices in the Era of COVID-19. Obesity (Silver Spring). 2020 Nov;28(11):2056-2063. doi: 10.1002/oby.22996. |

| Study                        | Reference                                                                                                                                                                                                                                                                                                                                                                                                                                                                                                                                                                                                                                                                                                                                                                                                                                                                                |
|------------------------------|------------------------------------------------------------------------------------------------------------------------------------------------------------------------------------------------------------------------------------------------------------------------------------------------------------------------------------------------------------------------------------------------------------------------------------------------------------------------------------------------------------------------------------------------------------------------------------------------------------------------------------------------------------------------------------------------------------------------------------------------------------------------------------------------------------------------------------------------------------------------------------------|
| Adibelli & Sümen, 2020       | Adibelli D, Sümen A. The effect of the coronavirus (COVID-19) pandemic on health-related quality of life in children. <i>Child Youth Serv Rev.</i> 2020 Dec;119:105595. doi: 10.1016/j.chilcyouth.2020.105595.                                                                                                                                                                                                                                                                                                                                                                                                                                                                                                                                                                                                                                                                           |
| Aegerter et al., 2021        | Aegerter AM, Deforth M, Sjøgaard G, Johnston V, Volken T, Luomajoki H, Dratva J, Dressel H, Distler O, Melloh M, Elfering A; NEXpro Collaboration Group. No Evidence for a Decrease in Physical Activity Among Swiss Office Workers During COVID-19: A Longitudinal Study. <i>Front Psychol.</i> 2021 Feb 11;12:620307. doi: 10.3389/fpsyg.2021.620307.                                                                                                                                                                                                                                                                                                                                                                                                                                                                                                                                  |
| Aguilar-Farias et al., 2020  | Aguilar-Farias N, Toledo-Vargas M, Miranda-Marquez S, Cortinez-O'Ryan A, Cristi-Montero C, Rodriguez-Rodriguez F, Martino-Fuentealba P, Okely AD, Del Pozo Cruz B. Socio-demographic Predictors of Changes in Physical Activity, Screen Time, and Sleep among Toddlers and Preschoolers in Chile during the COVID-19 Pandemic. <i>Int J Environ Res Public Health.</i> 2020 Dec 29;18(1):176. doi: 10.3390/ijerph18010176.                                                                                                                                                                                                                                                                                                                                                                                                                                                               |
| Ahmed et al., 2020           | Ahmed MZ, Ahmed O, Aibao Z, Hanbin S, Siyu L, Ahmad A. Epidemic of COVID-19 in China and associated Psychological Problems. <i>Asian J Psychiatr.</i> 2020 Jun;51:102092. doi: 10.1016/j.ajp.2020.102092.                                                                                                                                                                                                                                                                                                                                                                                                                                                                                                                                                                                                                                                                                |
| Albalawi et al., 2021        | Albalawi, A., Hambly, C. and Speakman, J.R. (2021), The impact of the novel coronavirus movement restrictions in the United Kingdom on food outlet usage and body mass index. <i>Obes Sci Pract.</i> <a href="https://doi.org/10.1002/osp4.477">https://doi.org/10.1002/osp4.477</a>                                                                                                                                                                                                                                                                                                                                                                                                                                                                                                                                                                                                     |
| Albertella et al., 2021      | Albertella L, Rotaru K, Christensen E, Lowe A, Brierley ME, Richardson K, Chamberlain SR, Lee RSC, Kayayan E, Grant JE, Schluter-Hughes S, Ince C, Fontenelle LF, Segrave R, Yücel M. The Influence of Trait Compulsivity and Impulsivity on Addictive and Compulsive Behaviors During COVID-19. <i>Front Psychiatry.</i> 2021 Feb 23;12:634583. doi: 10.3389/fpsyg.2021.634583.                                                                                                                                                                                                                                                                                                                                                                                                                                                                                                         |
| Al-Domi et al., 2021         | Al-Domi H, Al-Dalaeen A, Al-Rosan S, Batarseh N, Nawaiseh H. Healthy nutritional behavior during COVID-19 lockdown: A cross-sectional study. <i>Clin Nutr ESPEN.</i> 2021 Apr;42:132-137. doi: 10.1016/j.clnesp.2021.02.003.                                                                                                                                                                                                                                                                                                                                                                                                                                                                                                                                                                                                                                                             |
| Alfawaz et al., 2021         | Alfawaz H, Amer OE, Aljumah AA, Aldisi DA, Enani MA, Aljohani NJ, Alotaibi NH, Alshingetti N, Alomar SY, Khattak MNK, Sabico S, Al-Daghri NM. Effects of home quarantine during COVID-19 lockdown on physical activity and dietary habits of adults in Saudi Arabia. <i>Sci Rep.</i> 2021 Mar 15;11(1):5904. doi: 10.1038/s41598-021-85330-2.                                                                                                                                                                                                                                                                                                                                                                                                                                                                                                                                            |
| Al Hourani et al., 2021      | Al Hourani H, Alkhatib B, Abdullah M. Impact of COVID-19 lockdown on body weight, eating habits and physical activity of Jordanian children and adolescents. <i>Disaster Med Public Health Prep.</i> 2021 Feb 16;1-28. doi: 10.1017/dmp.2021.48.                                                                                                                                                                                                                                                                                                                                                                                                                                                                                                                                                                                                                                         |
| Alhusseini & Alqahtani, 2020 | Alhusseini N, Alqahtani A. COVID-19 pandemic's impact on eating habits in Saudi Arabia. <i>J Public Health Res.</i> 2020 Sep 16;9(3):1868. doi: 10.4081/jphr.2020.1868.                                                                                                                                                                                                                                                                                                                                                                                                                                                                                                                                                                                                                                                                                                                  |
| Ali et al., 2021             | Ali A, Sohaib M, Iqbal S, Hayat K, Khan AU, Rasool MF. Evaluation of COVID-19 Disease Awareness and Its Relation to Mental Health, Dietary Habits, and Physical Activity: A Cross-Sectional Study from Pakistan. <i>Am J Trop Med Hyg.</i> 2021 Mar 9;tpmd201451. doi: 10.4269/ajtmh.20-1451.                                                                                                                                                                                                                                                                                                                                                                                                                                                                                                                                                                                            |
| Alomari et al., 2020         | Alomari MA, Khabour OF, Alzoubi KH. Changes in Physical Activity and Sedentary Behavior Amid Confinement: The BKSQ-COVID-19 Project. <i>Risk Manag Healthc Policy.</i> 2020 Sep 25;13:1757-1764. doi: 10.2147/RMHP.S268320.                                                                                                                                                                                                                                                                                                                                                                                                                                                                                                                                                                                                                                                              |
| Ammar et al., 2020           | Ammar A, Brach M, Trabelsi K, Chtourou H, Boukhris O, Masmoudi L, Bouaziz B, Bentlage E, How D, Ahmed M, Müller P, Müller N, Aloui A, Hammouda O, Paineiras-Domingos LL, Braakman-Jansen A, Wrede C, Bastoni S, Pernambuco CS, Mataruna L, Taheri M, Irandoust K, Khacharek A, Bragazzi NL, Chamari K, Glenn JM, Bott NT, Gargouri F, Chaari L, Batatia H, Ali GM, Abdelkarim O, Jarraya M, Abed KE, Souissi N, Van Gemert-Pijnen L, Riemann BL, Riemann L, Moalla W, Gómez-Raja J, Epstein M, Sanderman R, Schulz SV, Jerg A, Al-Horani R, Mansi T, Jmail M, Barbosa F, Ferreira-Santos F, Šimunič B, Pišot R, Gaggioli A, Bailey SJ, Steinacker JM, Driss T, Hoekelmann A. Effects of COVID-19 Home Confinement on Eating Behaviour and Physical Activity: Results of the ECLB-COVID19 International Online Survey. <i>Nutrients.</i> 2020 May 28;12(6):1583. doi: 10.3390/nu12061583. |
| Androutsos et al., 2021      | Androutsos O, Perperidi M, Georgiou C, Chouliaras G. Lifestyle Changes and Determinants of Children's and Adolescents' Body Weight Increase during the First COVID-19 Lockdown in Greece: The COV-EAT Study. <i>Nutrients.</i> 2021 Mar 13;13(3):930. doi: 10.3390/nu13030930.                                                                                                                                                                                                                                                                                                                                                                                                                                                                                                                                                                                                           |
| Antunes et al., 2020         | Antunes R, Frontini R, Amaro N, Salvador R, Matos R, Morouço P, Rebelo-Gonçalves R. Exploring Lifestyle Habits, Physical Activity, Anxiety and Basic Psychological Needs in a Sample of Portuguese Adults during COVID-19. <i>Int J Environ Res Public Health.</i> 2020 Jun 18;17(12):4360. doi: 10.3390/ijerph17124360.                                                                                                                                                                                                                                                                                                                                                                                                                                                                                                                                                                 |
| Arend et al., 2021           | Arend AK, Bleichert J, Pannicke B, Reichenberger J. Increased Screen Use on Days With Increased Perceived COVID-19-Related Confinements-A Day Level Ecological Momentary Assessment Study. <i>Front Public Health.</i> 2021 Feb 2;8:623205. doi: 10.3389/fpubh.2020.623205.                                                                                                                                                                                                                                                                                                                                                                                                                                                                                                                                                                                                              |
| Asiamah et al., 2021         | Asiamah N, Opuni FF, Mends-Brew E, Mensah SW, Mensah HK, Quansah F. Short-Term Changes in Behaviors Resulting from COVID-19-Related Social Isolation and Their Influences on Mental Health in Ghana. <i>Community Ment Health J.</i> 2021 Jan;57(1):79-92. doi: 10.1007/s10597-020-00722-4.                                                                                                                                                                                                                                                                                                                                                                                                                                                                                                                                                                                              |
| Assaloni et al., 2020        | Assaloni R, Pellino VC, Puci MV, Ferraro OE, Lovecchio N, Girelli A, Vandoni M. Coronavirus disease (Covid-19): How does the exercise practice in active people with type 1 diabetes change? A preliminary survey. <i>Diabetes Res Clin Pract.</i> 2020 Aug;166:108297. doi: 10.1016/j.diabres.2020.108297.                                                                                                                                                                                                                                                                                                                                                                                                                                                                                                                                                                              |
| Badellino et al., 2021       | Badellino H, Gobbo ME, Torres E, Aschieri ME, Biotti M, Alvarez V, Gigante C, Cachiarelli M. 'It's the economy, stupid': Lessons of a longitudinal study of depression in Argentina. <i>Int J Soc Psychiatry.</i> 2021 Mar 11;20764021999687. doi: 10.1177/0020764021999687.                                                                                                                                                                                                                                                                                                                                                                                                                                                                                                                                                                                                             |
| Barone Gibbs et al., 2021    | Barone Gibbs B, Kline CE, Huber KA, Paley JL, Perera S. Covid-19 shelter-at-home and work, lifestyle and well-being in desk workers. <i>Occup Med (Lond).</i> 2021 Apr 9;71(2):86-94. doi: 10.1093/occmed/kqab011.                                                                                                                                                                                                                                                                                                                                                                                                                                                                                                                                                                                                                                                                       |
| Bartoszek et al., 2020       | Bartoszek A, Walkowiak D, Bartoszek A, Kardas G. Mental Well-Being (Depression, Loneliness, Insomnia, Daily Life Fatigue) during COVID-19 Related Home-Confinement-A Study from Poland. <i>Int J Environ Res Public Health.</i> 2020 Oct 12;17(20):7417. doi: 10.3390/ijerph17207417.                                                                                                                                                                                                                                                                                                                                                                                                                                                                                                                                                                                                    |

| Study                          | Reference                                                                                                                                                                                                                                                                                                                                                                                                                                  |
|--------------------------------|--------------------------------------------------------------------------------------------------------------------------------------------------------------------------------------------------------------------------------------------------------------------------------------------------------------------------------------------------------------------------------------------------------------------------------------------|
| Barwais, 2020                  | Barwais, Faisal. (2020). Physical Activity at Home During the COVID-19 Pandemic in the Two Most-affected Cities in Saudi Arabia. <i>The Open Public Health Journal</i> . 13. 470-476. doi: 10.2174/1874944502013010470.                                                                                                                                                                                                                    |
| Bar-Zeev et al., 2021          | Bar-Zeev Y, Shauly M, Lee H, Neumark Y. Changes in Smoking Behaviour and Home-Smoking Rules during the Initial COVID-19 Lockdown Period in Israel. <i>Int J Environ Res Public Health</i> . 2021 Feb 17;18(4):1931. doi: 10.3390/ijerph18041931.                                                                                                                                                                                           |
| Belgen Kaygisiz et al., 2020   | Belgen Kaygisiz B, Güçhan Topcu Z, Meriç A, Gözgen H, Çoban F. Determination of exercise habits, physical activity level and anxiety level of postmenopausal women during COVID-19 pandemic. <i>Health Care Women Int</i> . 2020 Nov-Dec;41(11-12):1240-1254. doi: 10.1080/07399332.2020.1842878.                                                                                                                                          |
| Bertrand et al., 2021          | Bertrand L, Shaw KA, Ko J, Deprez D, Chilibeck PD, Zello GA. The impact of the coronavirus disease 2019 (COVID-19) pandemic on university students' dietary intake, physical activity, and sedentary behaviour. <i>Appl Physiol Nutr Metab</i> . 2021 Mar;46(3):265-272. doi: 10.1139/apnm-2020-0990.                                                                                                                                      |
| Bhutani et al., 2021           | Bhutani S, vanDellen MR, Cooper JA. Longitudinal Weight Gain and Related Risk Behaviors during the COVID-19 Pandemic in Adults in the US. <i>Nutrients</i> . 2021 Feb 19;13(2):671.                                                                                                                                                                                                                                                        |
| Bin Zarah et al., 2020         | Bin Zarah A, Enriquez-Marulanda J, Andrade JM. Relationship between Dietary Habits, Food Attitudes and Food Security Status among Adults Living within the United States Three Months Post-Mandated Quarantine: A Cross-Sectional Study. <i>Nutrients</i> . 2020 Nov 12;12(11):3468. doi: 10.3390/nu12113468.                                                                                                                              |
| Biviá-Roig et al., 2020        | Biviá-Roig G, La Rosa VL, Gómez-Tébar M, Serrano-Raya L, Amer-Cuenca JJ, Caruso S, Commodari E, Barrasa-Shaw A, Lisón JF. Analysis of the Impact of the Confinement Resulting from COVID-19 on the Lifestyle and Psychological Wellbeing of Spanish Pregnant Women: An Internet-Based Cross-Sectional Survey. <i>Int J Environ Res Public Health</i> . 2020 Aug 15;17(16):5933. doi: 10.3390/ijerph17165933.                               |
| Błaszczak-Bębenek et al., 2020 | Błaszczak-Bębenek E, Jagielski P, Bolesławska I, Jagielska A, Nitsch-Osuch A, Kawalec P. Nutrition Behaviors in Polish Adults before and during COVID-19 Lockdown. <i>Nutrients</i> . 2020 Oct 10;12(10):3084. doi: 10.3390/nu12103084.                                                                                                                                                                                                    |
| Bollen et al., 2021            | Bollen Z, Pabst A, Creupelandt C, Fontesse S, Lannoy S, Pinon N, Maurage P. Prior drinking motives predict alcohol consumption during the COVID-19 lockdown: A cross-sectional online survey among Belgian college students. <i>Addict Behav</i> . 2021 Apr;115:106772. doi: 10.1016/j.addbeh.2020.106772.                                                                                                                                 |
| Bonaccio et al., 2021          | Bonaccio M, Costanzo S, Ruggiero E, Persichillo M, Esposito S, Olivieri M, Di Castelnuovo A, Cerletti C, Donati MB, de Gaetano G, Iacoviello L; Moli-LOCK Study Investigators. Changes in ultra-processed food consumption during the first Italian lockdown following the COVID-19 pandemic and major correlates: results from two population-based cohorts. <i>Public Health Nutr</i> . 2021 Mar 5:1-27. doi: 10.1017/S1368980021000999. |
| Boschuetz et al., 2020         | Boschuetz N, Cheng S, Mei L, Loy VM. Changes in Alcohol Use Patterns in the United States During COVID-19 Pandemic. <i>WMJ</i> . 2020 Sep;119(3):171-176.                                                                                                                                                                                                                                                                                  |
| Botero et al., 2021            | Botero JP, Farah BQ, Correia MA, Lofrano-Prado MC, Cucato GG, Shumate G, Ritti-Dias RM, Prado WLD. Impact of the COVID-19 pandemic stay at home order and social isolation on physical activity levels and sedentary behavior in Brazilian adults. <i>Einstein (Sao Paulo)</i> . 2021 Mar 5;19:eAE6156. doi: 10.31744/einstein_journal/2021AE6156.                                                                                         |
| Bourdas et al., 2020           | Bourdas DI, Zacharakis ED. Evolution of changes in physical activity over lockdown time: Physical activity datasets of four independent adult sample groups corresponding to each of the last four of the six COVID-19 lockdown weeks in Greece. <i>Data Brief</i> . 2020 Oct;32:106301. doi: 10.1016/j.dib.2020.106301.                                                                                                                   |
| Bourdas & Zacharakis, 2020     | Bourdas DI, Zacharakis ED. Impact of COVID-19 Lockdown on Physical Activity in a Sample of Greek Adults. <i>Sports (Basel)</i> . 2020 Oct 21;8(10):139. doi: 10.3390/sports8100139.                                                                                                                                                                                                                                                        |
| Brady et al., 2021             | Brady SM, Fenton SAM, Metsios GS, Bosworth A, Duda JL, Kitas GD, Veldhuijzen van Zanten JJCS. Different types of physical activity are positively associated with indicators of mental health and psychological wellbeing in rheumatoid arthritis during COVID-19. <i>Rheumatol Int</i> . 2021 Feb;41(2):335-344. doi: 10.1007/s00296-020-04751-w.                                                                                         |
| Brand et al., 2020             | Brand R, Timme S, Nosrat S. When Pandemic Hits: Exercise Frequency and Subjective Well-Being During COVID-19 Pandemic. <i>Front Psychol</i> . 2020 Sep 24;11:570567. doi: 10.3389/fpsyg.2020.570567.                                                                                                                                                                                                                                       |
| Brindal et al., 2021           | Brindal E, Ryan JC, Kakoschke N, Golley S, Zajac IT, Wiggins B. Individual differences and changes in lifestyle behaviours predict decreased subjective well-being during COVID-19 restrictions in an Australian sample. <i>J Public Health (Oxf)</i> . 2021 Mar 4;fdab040. doi: 10.1093/pubmed/fdab040.                                                                                                                                   |
| Brown et al., 2021             | Brown L, Mossabir R, Harrison N, Brundle C, Smith J, Clegg A. Life in lockdown: a telephone survey to investigate the impact of COVID-19 lockdown measures on the lives of older people (≥75 years). <i>Age Ageing</i> . 2021 Feb 26;50(2):341-346. doi: 10.1093/ageing/afaa255.                                                                                                                                                           |
| Buoite Stella et al., 2021     | Buoite Stella A, Ajčević M, Furlanis G, Cillotto T, Menichelli A, Accardo A, Manganotti P. Smart technology for physical activity and health assessment during COVID-19 lockdown. <i>J Sports Med Phys Fitness</i> . 2021 Mar;61(3):452-460. doi: 10.23736/S0022-4707.20.11373-2.                                                                                                                                                          |
| Cacioppo et al., 2020          | Cacioppo M, Bouvier S, Bailly R, Houx L, Lempereur M, Mensah-Gourmel J, Kandalaf C, Varenque R, Chatelin A, Vagnoni J, Vuillerot C, Gautheron V, Dinomais M, Dheilly E, Brochard S, Pons C; ECHO Group. Emerging health challenges for children with physical disabilities and their parents during the COVID-19 pandemic: The ECHO French survey. <i>Ann Phys Rehabil Med</i> . 2020 Aug 18:101429. doi: 10.1016/j.rehab.2020.08.001.     |
| Callinan et al., 2021          | Callinan S, Mojica-Perez Y, Wright CJC, Livingston M, Kuntsche S, Laslett AM, Room R, Kuntsche E. Purchasing, consumption, demographic and socioeconomic variables associated with shifts in alcohol consumption during the COVID-19 pandemic. <i>Drug Alcohol Rev</i> . 2021 Feb;40(2):183-191. doi: 10.1111/dar.13200.                                                                                                                   |
| Callinan et al., 2020          | Callinan S, Smit K, Mojica-Perez Y, D'Aquino S, Moore D, Kuntsche E. Shifts in alcohol consumption during the COVID-19 pandemic: early indications from Australia. <i>Addiction</i> . 2020 Oct 2;10.1111/add.15275. doi: 10.1111/add.15275.                                                                                                                                                                                                |

| Study                          | Reference                                                                                                                                                                                                                                                                                                                                                                                                                                                                        |
|--------------------------------|----------------------------------------------------------------------------------------------------------------------------------------------------------------------------------------------------------------------------------------------------------------------------------------------------------------------------------------------------------------------------------------------------------------------------------------------------------------------------------|
| Callow et al., 2020            | Callow DD, Arnold-Nedimala NA, Jordan LS, Pena GS, Won J, Woodard JL, Smith JC. The Mental Health Benefits of Physical Activity in Older Adults Survive the COVID-19 Pandemic. <i>Am J Geriatr Psychiatry</i> . 2020 Oct;28(10):1046-1057. doi: 10.1016/j.jagp.2020.06.024.                                                                                                                                                                                                      |
| Cancello et al., 2020          | Cancello R, Soranna D, Zambra G, Zambon A, Invitti C. Determinants of the Lifestyle Changes during COVID-19 Pandemic in the Residents of Northern Italy. <i>Int J Environ Res Public Health</i> . 2020 Aug 28;17(17):6287. doi: 10.3390/ijerph17176287.                                                                                                                                                                                                                          |
| Caponnetto et al., 2020        | Caponnetto P, Inguscio L, Saitta C, Maglia M, Benfatto F, Polosa R. Smoking behavior and psychological dynamics during COVID-19 social distancing and stay-at-home policies: A survey. <i>Health Psychol Res</i> . 2020 May 27;8(1):9124. doi: 10.4081/hpr.2020.9124.                                                                                                                                                                                                            |
| Carriedo et al., 2020          | Carriedo A, Cecchini JA, Fernández-Río J, Méndez-Giménez A. Resilience and physical activity in people under home isolation due to COVID-19: A preliminary evaluation. <i>Ment Health Phys Act</i> . 2020 Oct;19:100361. doi: 10.1016/j.mhpa.2020.100361.                                                                                                                                                                                                                        |
| Castañeda-Babarro et al., 2020 | Castañeda-Babarro A, Arbillaga-Etxarri A, Gutiérrez-Santamaría B, Coca A. Physical Activity Change during COVID-19 Confinement. <i>Int J Environ Res Public Health</i> . 2020 Sep 21;17(18):6878. doi: 10.3390/ijerph17186878.                                                                                                                                                                                                                                                   |
| Castellini et al., 2020        | Castellini G, Cassioli E, Rossi E, Innocenti M, Gironi V, Sanfilippo G, Felciai F, Monteleone AM, Ricca V. The impact of COVID-19 epidemic on eating disorders: A longitudinal observation of pre versus post psychopathological features in a sample of patients with eating disorders and a group of healthy controls. <i>Int J Eat Disord</i> . 2020 Nov;53(11):1855-1862. doi: 10.1002/eat.23368.                                                                            |
| Cecchini et al., 2021          | Cecchini JA, Carriedo A, Fernández-Río J, Méndez-Giménez A, González C, Sánchez-Martínez B, Rodríguez-González P. A longitudinal study on depressive symptoms and physical activity during the Spanish lockdown. <i>Int J Clin Health Psychol</i> . 2021 Jan-Apr;21(1):100200. doi: 10.1016/j.ijchp.2020.09.001.                                                                                                                                                                 |
| Cellini et al., 2020           | Cellini N, Canale N, Mioni G, Costa S. Changes in sleep pattern, sense of time and digital media use during COVID-19 lockdown in Italy. <i>J Sleep Res</i> . 2020 Aug;29(4):e13074. doi: 10.1111/jsr.13074.                                                                                                                                                                                                                                                                      |
| Chambonniere et al., 2021      | Chambonniere C, Lambert C, Fearnbach N, Tardieu M, Fillon A, Genin P, Larras B, Melsens P, Bois J, Pereira B, Tremblay A, Thivel D, Duclos M. Effect of the COVID-19 lockdown on physical activity and sedentary behaviors in French children and adolescents: New results from the ONAPS national survey. <i>Eur J Integr Med</i> . 2021 Apr;43:101308. doi: 10.1016/j.eujim.2021.101308.                                                                                       |
| Chang et al., 2020             | Chang YK, Hung CL, Timme S, Nosrat S, Chu CH. Exercise Behavior and Mood during the COVID-19 Pandemic in Taiwan: Lessons for the Future. <i>Int J Environ Res Public Health</i> . 2020 Sep 28;17(19):7092. doi: 10.3390/ijerph17197092.                                                                                                                                                                                                                                          |
| Cheikh Ismail et al., 2020a    | Cheikh Ismail L, Osaili TM, Mohamad MN, Al Marzouqi A, Jarrar AH, Abu Jamous DO, Magriplis E, Ali HI, Al Sabbah H, Hasan H, AlMarzooqi LMR, Stojanovska L, Hashim M, Shaker Obaid RR, Saleh ST, Al Dhaheri AS. Eating Habits and Lifestyle during COVID-19 Lockdown in the United Arab Emirates: A Cross-Sectional Study. <i>Nutrients</i> . 2020 Oct 29;12(11):3314. doi: 10.3390/nu12113314.                                                                                   |
| Cheikh Ismail et al., 2020b    | Cheikh Ismail L, Osaili TM, Mohamad MN, Al Marzouqi A, Jarrar AH, Zampelas A, Habib-Mourad C, Omar Abu Jamous D, Ali HI, Al Sabbah H, Hasan H, AlMarzooqi LMR, Stojanovska L, Hashim M, Shaker Obaid RR, ElFeky S, Saleh ST, Shawar ZAM, Al Dhaheri AS. Assessment of eating habits and lifestyle during the coronavirus 2019 pandemic in the Middle East and North Africa region: a cross-sectional study. <i>Br J Nutr</i> . 2020 Nov 17:1-10. doi: 10.1017/S0007114520004547. |
| Cheval et al., 2021            | Cheval B, Sivaramakrishnan H, Maltagliati S, Fessler L, Forestier C, Sarrazin P, Orsholits D, Chalabaev A, Sander D, Ntoumanis N, Boisgontier MP. Relationships between changes in self-reported physical activity, sedentary behaviour and health during the coronavirus (COVID-19) pandemic in France and Switzerland. <i>J Sports Sci</i> . 2021 Mar;39(6):699-704. doi: 10.1080/02640414.2020.1841396.                                                                       |
| Chodkiewicz et al., 2020       | Chodkiewicz J, Talarowska M, Miniszewska J, Nawrocka N, Bilinski P. Alcohol Consumption Reported during the COVID-19 Pandemic: The Initial Stage. <i>Int J Environ Res Public Health</i> . 2020 Jun 29;17(13):4677. doi: 10.3390/ijerph17134677.                                                                                                                                                                                                                                 |
| Chouchou et al., 2021          | Chouchou F, Augustini M, Caderby T, Caron N, Turpin NA, Dalleau G. The importance of sleep and physical activity on well-being during COVID-19 lockdown: reunion island as a case study. <i>Sleep Med</i> . 2021 Jan;77:297-301. doi: 10.1016/j.sleep.2020.09.014.                                                                                                                                                                                                               |
| Constandt et al., 2020         | Constandt B, Thibaut E, De Bosscher V, Scheerder J, Ricour M, Willem A. Exercising in Times of Lockdown: An Analysis of the Impact of COVID-19 on Levels and Patterns of Exercise among Adults in Belgium. <i>Int J Environ Res Public Health</i> . 2020 Jun 10;17(11):4144. doi: 10.3390/ijerph17114144.                                                                                                                                                                        |
| Constant et al., 2020          | Constant A, Conserve DF, Gallopel-Morvan K, Raude J. Socio-Cognitive Factors Associated With Lifestyle Changes in Response to the COVID-19 Epidemic in the General Population: Results From a Cross-Sectional Study in France. <i>Front Psychol</i> . 2020 Sep 29;11:579460. doi: 10.3389/fpsyg.2020.579460.                                                                                                                                                                     |
| Coulthard et al., 2021         | Coulthard H, Sharps M, Cunliffe L, van den Tol A. Eating in the lockdown during the Covid 19 pandemic; self-reported changes in eating behaviour, and associations with BMI, eating style, coping and health anxiety. <i>Appetite</i> . 2021 Jun 1;161:105082. doi: 10.1016/j.appet.2020.105082.                                                                                                                                                                                 |
| Cummings et al., 2021          | Cummings JR, Ackerman JM, Wolfson JA, Gearhardt AN. COVID-19 stress and eating and drinking behaviors in the United States during the early stages of the pandemic. <i>Appetite</i> . 2021 Jul 1;162:105163. doi: 10.1016/j.appet.2021.105163.                                                                                                                                                                                                                                   |
| Curtis et al., 2021            | Curtis RG, Olds T, Ferguson T, Frayse F, Dumuid D, Esterman A, Hendrie GA, Brown WJ, Lagiseti R, Maher CA. Changes in diet, activity, weight, and wellbeing of parents during COVID-19 lockdown. <i>PLoS One</i> . 2021 Mar 3;16(3):e0248008. doi: 10.1371/journal.pone.0248008.                                                                                                                                                                                                 |
| da Silva et al., 2021          | da Silva LF, de Almeida-Neto PF, Bulhões-Correia A, de Queiros VS, Matos DG, Silva Dantas PM, de Araujo Tinoco Cabral BG. Impact of social isolation on the level of physical activity in young Brazilian athletes caused by COVID-19. <i>J Sports Med Phys Fitness</i> . 2021 Mar 5. doi: 10.23736/S0022-4707.21.12198-X.                                                                                                                                                       |

| Study                          | Reference                                                                                                                                                                                                                                                                                                                                                                                                                                                                                                                           |
|--------------------------------|-------------------------------------------------------------------------------------------------------------------------------------------------------------------------------------------------------------------------------------------------------------------------------------------------------------------------------------------------------------------------------------------------------------------------------------------------------------------------------------------------------------------------------------|
| Deschasaux-Tanguy et al., 2021 | Deschasaux-Tanguy M, Druetne-Pecollo N, Esseddik Y, de Edelenyi FS, Allès B, Andreeva VA, Baudry J, Charreire H, Deschamps V, Egnell M, Fezeu LK, Galan P, Julia C, Kesse-Guyot E, Latino-Martel P, Oppert JM, Péneau S, Verdor C, Hercberg S, Touvier M. Diet and physical activity during the coronavirus disease 2019 (COVID-19) lockdown (March-May 2020): results from the French NutriNet-Santé cohort study. <i>Am J Clin Nutr</i> . 2021 Apr 6;113(4):924-938. doi: 10.1093/ajcn/nqaa336.                                   |
| De Sio et al., 2020            | De Sio S, Buomprisco G, La Torre G, Lapteva E, Perri R, Greco E, Mucci N, Cedrone F. The impact of COVID-19 on doctors' well-being: results of a web survey during the lockdown in Italy. <i>Eur Rev Med Pharmacol Sci</i> . 2020 Jul;24(14):7869-7879. doi: 10.26355/eurrev_202007_22292.                                                                                                                                                                                                                                          |
| Di Corrado et al., 2020        | Di Corrado D, Magnano P, Muzii B, Coco M, Guarnera M, De Lucia S, Maldonato NM. Effects of social distancing on psychological state and physical activity routines during the COVID-19 pandemic. <i>Sport Sci Health</i> . 2020 Sep 25:1-6. doi: 10.1007/s11332-020-00697-5.                                                                                                                                                                                                                                                        |
| Di Renzo et al., 2020          | Di Renzo L, Gualtieri P, Pivari F, Soldati L, Attinà A, Cinelli G, Leggeri C, Caparello G, Barrea L, Scerbo F, Esposito E, De Lorenzo A. Eating habits and lifestyle changes during COVID-19 lockdown: an Italian survey. <i>J Transl Med</i> . 2020 Jun 8;18(1):229. doi: 10.1186/s12967-020-02399-5.                                                                                                                                                                                                                              |
| Di Santo et al., 2020          | Di Santo SG, Franchini F, Filippini B, Martone A, Sannino S. The Effects of COVID-19 and Quarantine Measures on the Lifestyles and Mental Health of People Over 60 at Increased Risk of Dementia. <i>Front Psychiatry</i> . 2020 Oct 14;11:578628. doi: 10.3389/fpsy.2020.578628.                                                                                                                                                                                                                                                   |
| Dumas et al., 2020             | Dumas TM, Ellis W, Litt DM. What Does Adolescent Substance Use Look Like During the COVID-19 Pandemic? Examining Changes in Frequency, Social Contexts, and Pandemic-Related Predictors. <i>J Adolesc Health</i> . 2020 Sep;67(3):354-361. doi: 10.1016/j.jadohealth.2020.06.018.                                                                                                                                                                                                                                                   |
| Drieskens et al., 2021         | Drieskens S, Berger N, Vandevijvere S, Gisle L, Braekman E, Charafeddine R, De Ridder K, Demarest S. Short-term impact of the COVID-19 confinement measures on health behaviours and weight gain among adults in Belgium. <i>Arch Public Health</i> . 2021 Feb 22;79(1):22. doi: 10.1186/s13690-021-00542-2.                                                                                                                                                                                                                        |
| Dunton et al., 2020a           | Dunton GF, Do B, Wang SD. Early effects of the COVID-19 pandemic on physical activity and sedentary behavior in children living in the U.S. <i>BMC Public Health</i> . 2020 Sep 4;20(1):1351. doi: 10.1186/s12889-020-09429-3.                                                                                                                                                                                                                                                                                                      |
| Dunton et al., 2020b           | Dunton GF, Wang SD, Do B, Courtney J. Early effects of the COVID-19 pandemic on physical activity locations and behaviors in adults living in the United States. <i>Prev Med Rep</i> . 2020 Dec;20:101241. doi: 10.1016/j.pmedr.2020.101241.                                                                                                                                                                                                                                                                                        |
| Dutta et al., 2020             | Koumi Dutta, Ruchira Mukherjee, Devashish Sen & Subhashis Sahu (2020) Effect of COVID-19 lockdown on sleep behavior and screen exposure time: an observational study among Indian school children, <i>Biological Rhythm Research</i> , DOI: 10.1080/09291016.2020.1825284                                                                                                                                                                                                                                                           |
| Eek et al., 2021               | Eek F, Larsson C, Wisén A, Ekval Hansson E. Self-Perceived Changes in Physical Activity and the Relation to Life Satisfaction and Rated Physical Capacity in Swedish Adults during the COVID-19 Pandemic-A Cross Sectional Study. <i>Int J Environ Res Public Health</i> . 2021 Jan 14;18(2):671. doi: 10.3390/ijerph18020671.                                                                                                                                                                                                      |
| Elnaggar et al., 2020          | Elnaggar RK, Alqahtani BA, Mahmoud WS, Elfakharany MS. Physical Activity in Adolescents During the Social Distancing Policies of the COVID-19 Pandemic. <i>Asia Pac J Public Health</i> . 2020 Nov;32(8):491-494. doi: 10.1177/1010539520963564.                                                                                                                                                                                                                                                                                    |
| Elran-Barak et al., 2020       | Elran-Barak R, Mozeikov M. One Month into the Reinforcement of Social Distancing due to the COVID-19 Outbreak: Subjective Health, Health Behaviors, and Loneliness among People with Chronic Medical Conditions. <i>Int J Environ Res Public Health</i> . 2020 Jul 27;17(15):5403. doi: 10.3390/ijerph17155403.                                                                                                                                                                                                                     |
| Emerson, 2020                  | Emerson KG. Coping with being cooped up: Social distancing during COVID-19 among 60+ in the United States. <i>Rev Panam Salud Publica</i> . 2020 Jun 29;44:e81. doi: 10.26633/RPSP.2020.81.                                                                                                                                                                                                                                                                                                                                         |
| Evans et al., 2021             | Evans S, Alkan E, Bhangoo JK, Tenenbaum H, Ng-Knight T. Effects of the COVID-19 lockdown on mental health, wellbeing, sleep, and alcohol use in a UK student sample. <i>Psychiatry Res</i> . 2021 Apr;298:113819. doi: 10.1016/j.psychres.2021.113819.                                                                                                                                                                                                                                                                              |
| Fallon et al., 2020            | Fallon N, Brown C, Twiddy H, et al. Adverse effects of COVID-19-related lockdown on pain, physical activity and psychological well-being in people with chronic pain. <i>British Journal of Pain</i> . November 2020. doi:10.1177/2049463720973703                                                                                                                                                                                                                                                                                  |
| Faulkner et al., 2021          | Faulkner J, O'Brien WJ, McGrane B, Wadsworth D, Batten J, Askew CD, Badenhorst C, Byrd E, Coulter M, Draper N, Elliot C, Fryer S, Hamlin MJ, Jakeman J, Mackintosh KA, McNarry MA, Mitchelmore A, Murphy J, Ryan-Stewart H, Saynor Z, Schaumberg M, Stone K, Stoner L, Stuart B, Lambrick D. Physical activity, mental health and well-being of adults during initial COVID-19 containment strategies: A multi-country cross-sectional analysis. <i>J Sci Med Sport</i> . 2021 Apr;24(4):320-326. doi: 10.1016/j.jsams.2020.11.016. |
| Fearnbach et al., 2021         | Fearnbach SN, Flanagan EW, Höchsmann C, Beyl RA, Altazan AD, Martin CK, Redman LM. Factors Protecting against a Decline in Physical Activity during the COVID-19 Pandemic. <i>Med Sci Sports Exerc</i> . 2021 Jan 15. doi: 10.1249/MSS.0000000000002602.                                                                                                                                                                                                                                                                            |
| Ferrante et al., 2020          | Ferrante G, Camussi E, Piccinelli C, Senore C, Armaroli P, Ortale A, Garena F, Giordano L. Did social isolation during the SARS-CoV-2 epidemic have an impact on the lifestyles of citizens? <i>Epidemiol Prev</i> . 2020 Sep-Dec;44(5-6 Suppl 2):353-362. English. doi: 10.19191/EP20.5-6.S2.137.                                                                                                                                                                                                                                  |
| Fernandez-Rio et al., 2020     | Fernandez-Rio J, Cecchini JA, Mendez-Gimenez A, Carriedo A. Weight changes during the COVID-19 home confinement. Effects on psychosocial variables. <i>Obes Res Clin Pract</i> . 2020 Jul-Aug;14(4):383-385. doi: 10.1016/j.orcp.2020.07.006.                                                                                                                                                                                                                                                                                       |
| Feter et al., 2021             | Feter N, Caputo EL, Smith EC, Doring IR, Cassuriaga J, Leite JS, Reichert FF, da Silva MC, Coombes JS, Rombaldi AJ. Association between physical activity and subjective memory decline triggered by the COVID-19 pandemic: Findings from the PAMPA cohort. <i>Prev Med</i> . 2021 Apr;145:106415. doi: 10.1016/j.ypmed.2020.106415.                                                                                                                                                                                                |
| Flanagan et al., 2021          | Flanagan EW, Beyl RA, Fearnbach SN, Altazan AD, Martin CK, Redman LM. The Impact of COVID-19 Stay-At-Home Orders on Health Behaviors in Adults. <i>Obesity (Silver Spring)</i> . 2021 Feb;29(2):438-445. doi: 10.1002/oby.23066.                                                                                                                                                                                                                                                                                                    |

| Study                      | Reference                                                                                                                                                                                                                                                                                                                                                                                                    |
|----------------------------|--------------------------------------------------------------------------------------------------------------------------------------------------------------------------------------------------------------------------------------------------------------------------------------------------------------------------------------------------------------------------------------------------------------|
| Fong et al., 2020          | Fong BYF, Wong MCS, Law VTS, Lo MF, Ng TKC, Yee HHL, Leung TCH, Ho PWT. Relationships between Physical and Social Behavioural Changes and the Mental Status of Homebound Residents in Hong Kong during the COVID-19 Pandemic. <i>Int J Environ Res Public Health</i> . 2020 Sep 12;17(18):6653. doi: 10.3390/ijerph17186653.                                                                                 |
| Francisco et al., 2020     | Francisco R, Pedro M, Delvecchio E, Espada JP, Morales A, Mazzeschi C, Orgilés M. Psychological Symptoms and Behavioral Changes in Children and Adolescents During the Early Phase of COVID-19 Quarantine in Three European Countries. <i>Front Psychiatry</i> . 2020 Dec 3;11:570164. doi: 10.3389/fpsy.2020.570164.                                                                                        |
| Franco et al., 2021        | Franco I, Bianco A, Bonfiglio C, Sorino P, Mirizzi A, Campanella A, Buongiorno C, Liuzzi R, Osella AR. Decreased levels of physical activity: results from a cross-sectional study in southern Italy during the COVID-19 lockdown. <i>J Sports Med Phys Fitness</i> . 2021 Feb;61(2):294-300. doi: 10.23736/S0022-4707.20.11536-6.                                                                           |
| Füzéki et al., 2021        | Füzéki E, Schröder J, Carraro N, Merlo L, Reer R, Groneberg DA, Banzer W. Physical Activity during the First COVID-19-Related Lockdown in Italy. <i>Int J Environ Res Public Health</i> . 2021 Mar 3;18(5):2511. doi: 10.3390/ijerph18052511.                                                                                                                                                                |
| Gadermann et al., 2021     | Gadermann AC, Thomson KC, Richardson CG, Gagné M, McAuliffe C, Hirani S, Jenkins E. Examining the impacts of the COVID-19 pandemic on family mental health in Canada: findings from a national cross-sectional study. <i>BMJ Open</i> . 2021 Jan 12;11(1):e042871. doi: 10.1136/bmjopen-2020-042871.                                                                                                         |
| Gaiha et al., 2020         | Gaiha SM, Lempert LK, Halpern-Felsher B. Underage Youth and Young Adult e-Cigarette Use and Access Before and During the Coronavirus Disease 2019 Pandemic. <i>JAMA Netw Open</i> . 2020 Dec 1;3(12):e2027572. doi: 10.1001/jamanetworkopen.2020.27572.                                                                                                                                                      |
| Gallè et al., 2020a        | Gallè F, Sabella EA, Da Molin G, De Giglio O, Caggiano G, Di Onofrio V, Ferracuti S, Montagna MT, Liguori G, Orsi GB, Napoli C. Understanding Knowledge and Behaviors Related to CoViD-19 Epidemic in Italian Undergraduate Students: The EPICO Study. <i>Int J Environ Res Public Health</i> . 2020 May 16;17(10):3481. doi: 10.3390/ijerph17103481.                                                        |
| Gallè et al., 2020b        | Gallè F, Sabella EA, Ferracuti S, De Giglio O, Caggiano G, Protano C, Valeriani F, Parisi EA, Valerio G, Liguori G, Montagna MT, Romano Spica V, Da Molin G, Orsi GB, Napoli C. Sedentary Behaviors and Physical Activity of Italian Undergraduate Students during Lockdown at the Time of CoViD-19 Pandemic. <i>Int J Environ Res Public Health</i> . 2020 Aug 25;17(17):6171. doi: 10.3390/ijerph17176171. |
| Gallego-Gómez et al., 2020 | Gallego-Gómez JI, Campillo-Cano M, Carrión-Martínez A, Balanza S, Rodríguez-González-Moro MT, Simonelli-Muñoz AJ, Rivera-Caravaca JM. The COVID-19 Pandemic and Its Impact on Homebound Nursing Students. <i>Int J Environ Res Public Health</i> . 2020 Oct 10;17(20):7383. doi: 10.3390/ijerph17207383.                                                                                                     |
| Gallo et al., 2020         | Gallo LA, Gallo TF, Young SL, Moritz KM, Akison LK. The Impact of Isolation Measures Due to COVID-19 on Energy Intake and Physical Activity Levels in Australian University Students. <i>Nutrients</i> . 2020 Jun 23;12(6):1865. doi: 10.3390/nu12061865.                                                                                                                                                    |
| Garcia et al., 2021        | Garcia JM, Lawrence S, Brazendale K, Leahy N, Fukuda D. Brief report: The impact of the COVID-19 pandemic on health behaviors in adolescents with Autism Spectrum Disorder. <i>Disabil Health J</i> . 2021 Apr;14(2):101021. doi: 10.1016/j.dhjo.2020.101021.                                                                                                                                                |
| García-Tascón et al., 2020 | García-Tascón M, Sahelices-Pinto C, Mendaña-Cuervo C, Magaz-González AM. The Impact of the COVID-19 Confinement on the Habits of PA Practice According to Gender (Male/Female): Spanish Case. <i>Int J Environ Res Public Health</i> . 2020 Sep 23;17(19):6961. doi: 10.3390/ijerph17196961.                                                                                                                 |
| Garnett et al., 2021       | Garnett C, Jackson S, Oldham M, Brown J, Steptoe A, Fancourt D. Factors associated with drinking behaviour during COVID-19 social distancing and lockdown among adults in the UK. <i>Drug Alcohol Depend</i> . 2021 Feb 1;219:108461. doi: 10.1016/j.drugalcdep.2020.108461.                                                                                                                                 |
| Gendall et al., 2021       | Gendall P, Hoek J, Stanley J, Jenkins M, Every-Palmer S. Changes in Tobacco Use During the 2020 COVID-19 Lockdown in New Zealand. <i>Nicotine Tob Res</i> . 2021 Jan 30:ntaa257. doi: 10.1093/ntr/ntaa257.                                                                                                                                                                                                   |
| Genin et al., 2021         | Genin PM, Lambert C, Larras B, Pereira B, Toussaint JF, Baker JS, Tremblay A, Thivel D, Duclos M. How Did the COVID-19 Confinement Period Affect Our Physical Activity Level and Sedentary Behaviors? Methodology and First Results From the French National ONAPS Survey. <i>J Phys Act Health</i> . 2021 Feb 13;18(3):296-303. doi: 10.1123/jpah.2020-0449.                                                |
| Giacalone et al., 2020     | Giacalone D, Frøst MB, Rodríguez-Pérez C. Reported Changes in Dietary Habits During the COVID-19 Lockdown in the Danish Population: The Danish COVIDiet Study. <i>Front Nutr</i> . 2020 Dec 8;7:592112. doi: 10.3389/fnut.2020.592112.                                                                                                                                                                       |
| Gilic et al., 2020         | Gilic B, Ostojic L, Corluca M, Volaric T, Sekulic D. Contextualizing Parental/Familial Influence on Physical Activity in Adolescents before and during COVID-19 Pandemic: A Prospective Analysis. <i>Children (Basel)</i> . 2020 Sep 3;7(9):125. doi: 10.3390/children7090125.                                                                                                                               |
| Gjaka et al., 2021         | Gjaka M, Feka K, Bianco A, Tishukaj F, Giustino V, Parroco AM, Palma A, Battaglia G. The Effect of COVID-19 Lockdown Measures on Physical Activity Levels and Sedentary Behaviour in a Relatively Young Population Living in Kosovo. <i>J Clin Med</i> . 2021 Feb 14;10(4):763. doi: 10.3390/jcm10040763.                                                                                                    |
| Gonzalez et al., 2021      | Gonzalez M, Epperson AE, Halpern-Felsher B, Halliday DM, Song AV. Smokers Are More Likely to Smoke More after the COVID-19 California Lockdown Order. <i>Int J Environ Res Public Health</i> . 2021 Mar 5;18(5):2582. doi: 10.3390/ijerph18052582.                                                                                                                                                           |
| Górnicka et al., 2020      | Górnicka M, Drywień ME, Zielinska MA, Hamułka J. Dietary and Lifestyle Changes During COVID-19 and the Subsequent Lockdowns among Polish Adults: A Cross-Sectional Online Survey PLifeCOVID-19 Study. <i>Nutrients</i> . 2020 Aug 3;12(8):2324. doi: 10.3390/nu12082324.                                                                                                                                     |
| Hanafi et al., 2021        | Hanafi E, Siste K, Limawan AP, Sen LT, Christian H, Murtani BJ, Adrian, Siswidiani LP, Suwartono C. Alcohol- and Cigarette-Use Related Behaviors During Quarantine and Physical Distancing Amid COVID-19 in Indonesia. <i>Front Psychiatry</i> . 2021 Feb 2;12:622917. doi: 10.3389/fpsy.2021.622917.                                                                                                        |
| Hargreaves et al., 2021    | Hargreaves EA, Lee C, Jenkins M, Calverley JR, Hodge K, Houge Mackenzie S. Changes in Physical Activity Pre-, During and Post-lockdown COVID-19 Restrictions in New Zealand and the Explanatory Role of Daily Hassles. <i>Front Psychol</i> . 2021 Feb 25;12:642954. doi: 10.3389/fpsyg.2021.642954.                                                                                                         |

| Study                           | Reference                                                                                                                                                                                                                                                                                                                                                                                            |
|---------------------------------|------------------------------------------------------------------------------------------------------------------------------------------------------------------------------------------------------------------------------------------------------------------------------------------------------------------------------------------------------------------------------------------------------|
| Hashem et al., 2020             | Hashem, Shaimaa & Refay, Amira & Mostafa, Hend & Kamel, Iman & Sherif, Lobna. (2020). Impact of Coronavirus Disease-19 Lockdown on Egyptian Children and Adolescents: Dietary Pattern Changes Health Risk. <i>Open Access Macedonian Journal of Medical Sciences</i> . 8. 561-569. 10.3889/oamjms.2020.5249.                                                                                         |
| He et al., 2020                 | He M, Xian Y, Lv X, He J, Ren Y. Changes in Body Weight, Physical Activity, and Lifestyle During the Semi-lockdown Period After the Outbreak of COVID-19 in China: An Online Survey. <i>Disaster Med Public Health Prep</i> . 2020 Jul 14;1-6. doi: 10.1017/dmp.2020.237.                                                                                                                            |
| Herle et al., 2021              | Herle M, Smith AD, Bu F, Steptoe A, Fancourt D. Trajectories of eating behavior during COVID-19 lockdown: Longitudinal analyses of 22,374 adults. <i>Clin Nutr ESPEN</i> . 2021 Apr;42:158-165. doi: 10.1016/j.clnesp.2021.01.046.                                                                                                                                                                   |
| Herrera-Valenzuela et al., 2020 | Herrera-Valenzuela T, Narrea Vargas JJ, Merlo R, Valdés-Badilla PA, Pardo-Tamayo C, Franchini E. Effect of the COVID-19 quarantine on body mass among combat sports athletes. <i>Nutr Hosp</i> . 2020 Dec 16;37(6):1186-1189. English. doi: 10.20960/nh.03207.                                                                                                                                       |
| Hu et al., 2020                 | Hu Z, Lin X, Chiwanda Kaminga A, Xu H. Impact of the COVID-19 Epidemic on Lifestyle Behaviors and Their Association With Subjective Well-Being Among the General Population in Mainland China: Cross-Sectional Study. <i>J Med Internet Res</i> . 2020 Aug 25;22(8):e21176. doi: 10.2196/21176.                                                                                                      |
| Huber et al., 2020a             | Huber BC, Steffen J, Schlichtiger J, Graupe T, Deuster E, Strouvelle VP, Fischer MR, Massberg S, Brunner S. Alteration of physical activity during COVID-19 pandemic lockdown in young adults. <i>J Transl Med</i> . 2020 Nov 2;18(1):410. doi: 10.1186/s12967-020-02591-7.                                                                                                                          |
| Huber et al., 2020b             | Huber BC, Steffen J, Schlichtiger J, Brunner S. Altered nutrition behavior during COVID-19 pandemic lockdown in young adults. <i>Eur J Nutr</i> . 2020 Dec 1:1–10. doi: 10.1007/s00394-020-02435-6.                                                                                                                                                                                                  |
| Husain et al., 2020             | Husain W, Ashkanani F. Does COVID-19 change dietary habits and lifestyle behaviours in Kuwait: a community-based cross-sectional study. <i>Environ Health Prev Med</i> . 2020 Oct 12;25(1):61. doi: 10.1186/s12199-020-00901-5.                                                                                                                                                                      |
| Ingram et al., 2020             | Ingram J, Maciejewski G, Hand CJ. Changes in Diet, Sleep, and Physical Activity Are Associated With Differences in Negative Mood During COVID-19 Lockdown. <i>Front Psychol</i> . 2020 Sep 2;11:588604. doi: 10.3389/fpsyg.2020.588604.                                                                                                                                                              |
| Jacob et al., 2021              | Jacob L, Smith L, Armstrong NC, Yakkundi A, Barnett Y, Butler L, McDermott DT, Koyanagi A, Shin JI, Meyer J, Firth J, Remes O, López-Sánchez GF, Tully MA. Alcohol use and mental health during COVID-19 lockdown: A cross-sectional study in a sample of UK adults. <i>Drug Alcohol Depend</i> . 2021 Feb 1;219:108488. doi: 10.1016/j.drugalcdep.2020.108488.                                      |
| Jackson et al., 2021            | Jackson SE, Garnett C, Shahab L, Oldham M, Brown J. Association of the COVID-19 lockdown with smoking, drinking and attempts to quit in England: an analysis of 2019-20 data. <i>Addiction</i> . 2021 May;116(5):1233-1244. doi: 10.1111/add.15295.                                                                                                                                                  |
| Janssen et al., 2020            | Janssen X, Fleming L, Kirk A, Rollins L, Young D, Grealy M, MacDonald B, Flowers P, Williams L. Changes in Physical Activity, Sitting and Sleep across the COVID-19 National Lockdown Period in Scotland. <i>Int J Environ Res Public Health</i> . 2020 Dec 14;17(24):9362. doi: 10.3390/ijerph17249362.                                                                                             |
| Jia et al., 2021a               | Jia P, Liu L, Xie X, Yuan C, Chen H, Guo B, Zhou J, Yang S. Changes in dietary patterns among youths in China during COVID-19 epidemic: The COVID-19 impact on lifestyle change survey (COINLICS). <i>Appetite</i> . 2021 Mar 1;158:105015. doi: 10.1016/j.appet.2020.105015.                                                                                                                        |
| Jia et al., 2021b               | Jia P, Zhang L, Yu W, Yu B, Liu M, Zhang D, Yang S. Impact of COVID-19 lockdown on activity patterns and weight status among youths in China: the COVID-19 Impact on Lifestyle Change Survey (COINLICS). <i>Int J Obes (Lond)</i> . 2021 Mar;45(3):695-699. doi: 10.1038/s41366-020-00710-4.                                                                                                         |
| Joensen et al., 2020            | Joensen LE, Madsen KP, Holm L, Nielsen KA, Rod MH, Petersen AA, Rod NH, Willaing I. Diabetes and COVID-19: psychosocial consequences of the COVID-19 pandemic in people with diabetes in Denmark-what characterizes people with high levels of COVID-19-related worries? <i>Diabet Med</i> . 2020 Jul;37(7):1146-1154. doi: 10.1111/dme.14319.                                                       |
| Karlon et al., 2021             | Karlon A, Dolev M, Greenberg-Abrahami M, Menascu S, Frid L, Avrech-Shezifi S, Harari G, Magalashvili D, Achiron A. Physical activity behavior in people with multiple sclerosis during the COVID-19 pandemic in Israel: Results of an online survey. <i>Mult Scler Relat Disord</i> . 2021 Jan;47:102603. doi: 10.1016/j.msard.2020.102603.                                                          |
| Kaushal et al., 2020            | Kaushal N, Keith N, Aguiñaga S, Hagger MS. Social Cognition and Socioecological Predictors of Home-Based Physical Activity Intentions, Planning, and Habits during the COVID-19 Pandemic. <i>Behav Sci (Basel)</i> . 2020 Aug 31;10(9):133. doi: 10.3390/bs10090133.                                                                                                                                 |
| Kishimoto et al., 2020          | Kishimoto M, Ishikawa T, Odawara M. Behavioral changes in patients with diabetes during the COVID-19 pandemic. <i>Diabetol Int</i> . 2020 Sep 30;12(2):1-5. doi: 10.1007/s13340-020-00467-1.                                                                                                                                                                                                         |
| Knell et al., 2020              | Knell G, Robertson MC, Dooley EE, Burford K, Mendez KS. Health Behavior Changes During COVID-19 Pandemic and Subsequent "Stay-at-Home" Orders. <i>Int J Environ Res Public Health</i> . 2020 Aug 28;17(17):6268. doi: 10.3390/ijerph17176268.                                                                                                                                                        |
| Kochhar et al., 2020            | Kochhar AS, Bhasin R, Kochhar GK, Dadlani H, Mehta VV, Kaur R, Bhasin CK. Lockdown of 1.3 billion people in India during Covid-19 pandemic: A survey of its impact on mental health. <i>Asian J Psychiatr</i> . 2020 Dec;54:102213. doi: 10.1016/j.ajp.2020.102213.                                                                                                                                  |
| Koopmann et al., 2020           | Koopmann A, Georgiadou E, Kiefer F, Hillemacher T. Did the General Population in Germany Drink More Alcohol during the COVID-19 Pandemic Lockdown? <i>Alcohol Alcohol</i> . 2020 Oct 20;55(6):698-699. doi: 10.1093/alcac/agaa058.                                                                                                                                                                   |
| Kovacs et al., 2021             | Kovacs VA, Starc G, Brandes M, Kaj M, Blagus R, Leskošek B, Suesse T, Dinya E, Guinhouya BC, Zito V, Rocha PM, Gonzalez BP, Kontsevaya A, Brzezinski M, Bidiugan R, Kiraly A, Csányi T, Okely AD. Physical activity, screen time and the COVID-19 school closures in Europe - An observational study in 10 countries. <i>Eur J Sport Sci</i> . 2021 Mar 29:1-10. doi: 10.1080/17461391.2021.1897166. |

| Study                         | Reference                                                                                                                                                                                                                                                                                                                                                                                              |
|-------------------------------|--------------------------------------------------------------------------------------------------------------------------------------------------------------------------------------------------------------------------------------------------------------------------------------------------------------------------------------------------------------------------------------------------------|
| Kriaucioniene et al., 2020    | Kriaucioniene V, Bagdonaviciene L, Rodríguez-Pérez C, Petkeviciene J. Associations between Changes in Health Behaviours and Body Weight during the COVID-19 Quarantine in Lithuania: The Lithuanian COVIDiet Study. <i>Nutrients</i> . 2020 Oct 13;12(10):3119. doi: 10.3390/nu12103119.                                                                                                               |
| Lamarche et al., 2021         | Lamarche B, Brassard D, Lapointe A, Laramée C, Kearney M, Côté M, Bélanger-Gravel A, Desroches S, Lemieux S, Plante C. Changes in diet quality and food security among adults during the COVID-19-related early lockdown: results from NutriQuébec. <i>Am J Clin Nutr</i> . 2021 Apr 6;113(4):984-992. doi: 10.1093/ajcn/nqaa363.                                                                      |
| León-Zarceño et al., 2021     | León-Zarceño E, Moreno-Tenas A, Boix Vilella S, García-Naveira A, Serrano-Rosa MA. Habits and Psychological Factors Associated With Changes in Physical Activity Due to COVID-19 Confinement. <i>Front Psychol</i> . 2021 Feb 17;12:620745. doi: 10.3389/fpsyg.2021.620745.                                                                                                                            |
| Lesser & Nienhuis, 2020       | Lesser IA, Nienhuis CP. The Impact of COVID-19 on Physical Activity Behavior and Well-Being of Canadians. <i>Int J Environ Res Public Health</i> . 2020 May 31;17(11):3899. doi: 10.3390/ijerph17113899.                                                                                                                                                                                               |
| Lippke et al., 2021           | Lippke S, Fischer MA, Ratz T. Physical Activity, Loneliness, and Meaning of Friendship in Young Individuals - A Mixed-Methods Investigation Prior to and During the COVID-19 Pandemic With Three Cross-Sectional Studies. <i>Front Psychol</i> . 2021 Feb 2;12:617267. doi: 10.3389/fpsyg.2021.617267.                                                                                                 |
| López-Bueno et al., 2020      | López-Bueno R, Calatayud J, Casaña J, Casajús JA, Smith L, Tully MA, Andersen LL, López-Sánchez GF. COVID-19 Confinement and Health Risk Behaviors in Spain. <i>Front Psychol</i> . 2020 Jun 4;11:1426. doi: 10.3389/fpsyg.2020.01426.                                                                                                                                                                 |
| López-Gil et al., 2021        | López-Gil JF, Tremblay MS, Brazo-Sayavera J. Changes in Healthy Behaviors and Meeting 24-h Movement Guidelines in Spanish and Brazilian Preschoolers, Children and Adolescents during the COVID-19 Lockdown. <i>Children (Basel)</i> . 2021 Jan 26;8(2):83. doi: 10.3390/children8020083.                                                                                                              |
| López-Moreno et al., 2020     | López-Moreno M, López MTI, Miguel M, Garcés-Rimón M. Physical and Psychological Effects Related to Food Habits and Lifestyle Changes Derived from Covid-19 Home Confinement in the Spanish Population. <i>Nutrients</i> . 2020 Nov 10;12(11):3445. doi: 10.3390/nu12113445.                                                                                                                            |
| López-Sánchez et al., 2021    | López-Sánchez GF, López-Bueno R, Gil-Salmerón A, Zauder R, Skalska M, Jastrzębska J, Jastrzębski Z, Schuch FB, Grabovac I, Tully MA, Smith L. Comparison of physical activity levels in Spanish adults with chronic conditions before and during COVID-19 quarantine. <i>Eur J Public Health</i> . 2021 Feb 1;31(1):161-166. doi: 10.1093/eurpub/ckaa159.                                              |
| Luciano et al., 2020          | Luciano F, Cenacchi V, Vegro V, Pavei G. COVID-19 lockdown: Physical activity, sedentary behaviour and sleep in Italian medicine students. <i>Eur J Sport Sci</i> . 2020 Dec 6;1-10. doi: 10.1080/17461391.2020.1842910.                                                                                                                                                                               |
| Maher et al., 2021            | Maher JP, Hevel DJ, Reifsteck EJ, Drollette ES. Physical activity is positively associated with college students' positive affect regardless of stressful life events during the COVID-19 pandemic. <i>Psychol Sport Exerc</i> . 2021 Jan;52:101826. doi: 10.1016/j.psychsport.2020.101826.                                                                                                            |
| Malta et al., 2020            | Malta DC, Szwarcwald CL, Barros MBA, Gomes CS, Machado IE, Souza Júnior PRB, Romero DE, Lima MG, Damacena GN, Pina MF, Freitas MIF, Werneck AO, Silva DRPD, Azevedo LO, Gracie R. The COVID-19 Pandemic and changes in adult Brazilian lifestyles: a cross-sectional study, 2020. <i>Epidemiol Serv Saude</i> . 2020 Sep 25;29(4):e2020407. Portuguese, English. doi: 10.1590/S1679-49742020000400026. |
| Martinez et al., 2020         | Martinez EZ, Silva FM, Morigi TZ, Zucoloto ML, Silva TL, Joaquim AG, Dall'Agnol G, Galdino G, Martinez MOZ, Silva WRD. Physical activity in periods of social distancing due to COVID-19: a cross-sectional survey. <i>Cien Saude Colet</i> . 2020 Oct;25(suppl 2):4157-4168. doi: 10.1590/1413-812320202510.2.27242020.                                                                               |
| Martínez-de-Quel et al., 2021 | Martínez-de-Quel Ó, Suárez-Iglesias D, López-Flores M, Pérez CA. Physical activity, dietary habits and sleep quality before and during COVID-19 lockdown: A longitudinal study. <i>Appetite</i> . 2021 Mar 1;158:105019. doi: 10.1016/j.appet.2020.105019.                                                                                                                                             |
| Matvienko-Sikar et al., 2020  | Matvienko-Sikar K, Pope J, Cremin A, Carr H, Leitao S, Olander EK, Meaney S. Differences in levels of stress, social support, health behaviours, and stress-reduction strategies for women pregnant before and during the COVID-19 pandemic, and based on phases of pandemic restrictions, in Ireland. <i>Women Birth</i> . 2020 Oct 23;S1871-5192(20)30367-X. doi: 10.1016/j.wombi.2020.10.010.       |
| Maugeri et al., 2020          | Maugeri G, Castrogiovanni P, Battaglia G, Pippi R, D'Agata V, Palma A, Di Rosa M, Musumeci G. The impact of physical activity on psychological health during Covid-19 pandemic in Italy. <i>Heliyon</i> . 2020 Jun 24;6(6):e04315. doi: 10.1016/j.heliyon.2020.e04315.                                                                                                                                 |
| McPhee et al., 2020           | McPhee MD, Keough MT, Rundle S, Heath LM, Wardell JD, Hendershot CS. Depression, Environmental Reward, Coping Motives and Alcohol Consumption During the COVID-19 Pandemic. <i>Front Psychiatry</i> . 2020 Oct 30;11:574676. doi: 10.3389/fpsyg.2020.574676.                                                                                                                                           |
| Meiring et al., 2021          | Meiring RM, Gusso S, McCullough E, Bradnam L. The Effect of the COVID-19 Pandemic Movement Restrictions on Self-Reported Physical Activity and Health in New Zealand: A Cross-Sectional Survey. <i>Int J Environ Res Public Health</i> . 2021 Feb 10;18(4):1719. doi: 10.3390/ijerph18041719.                                                                                                          |
| Meyer et al., 2020            | Meyer J, McDowell C, Lansing J, Brower C, Smith L, Tully M, Herring M. Changes in Physical Activity and Sedentary Behavior in Response to COVID-19 and Their Associations with Mental Health in 3052 US Adults. <i>Int J Environ Res Public Health</i> . 2020 Sep 5;17(18):6469. doi: 10.3390/ijerph17186469.                                                                                          |
| Micheletti et al., 2021       | Micheletti Cremasco M, Mulasso A, Moroni A, Testa A, Degan R, Rainoldi A, Rabaglietti E. Relation among Perceived Weight Change, Sedentary Activities and Sleep Quality during COVID-19 Lockdown: A Study in an Academic Community in Northern Italy. <i>Int J Environ Res Public Health</i> . 2021                                                                                                    |
| Mititelu, 2021                | Magdalena, Mititelu. (2021). THE IMPACT OF COVID-19 LOCKDOWN ON THE LIFESTYLE AND DIETARY PATTERNS AMONG ROMANIAN POPULATION. <i>FARMACIA</i> . 69. 1-11. 10.31925/farmacia.2021.1.1.                                                                                                                                                                                                                  |
| Mon-López et al., 2020a       | Mon-López D, Bernardez-Vilaboa R, Fernandez-Balbuena AA, Sillero-Quintana M. The Influence of COVID-19 Isolation on Physical Activity Habits and Its Relationship with Convergence Insufficiency. <i>Int J Environ Res Public Health</i> . 2020 Oct 12;17(20):7406. doi: 10.3390/ijerph17207406.                                                                                                       |

| Study                      | Reference                                                                                                                                                                                                                                                                                                                                                                                                                                                                                      |
|----------------------------|------------------------------------------------------------------------------------------------------------------------------------------------------------------------------------------------------------------------------------------------------------------------------------------------------------------------------------------------------------------------------------------------------------------------------------------------------------------------------------------------|
| Mon-López et al., 2020b    | Mon-López D, García-Aliaga A, Ginés Bartolomé A, Muriarte Solana D. How has COVID-19 modified training and mood in professional and non-professional football players? <i>Physiol Behav.</i> 2020 Dec 1;227:113148. doi: 10.1016/j.physbeh.2020.113148.                                                                                                                                                                                                                                        |
| Mon-López et al., 2020c    | Mon-López D, de la Rubia Riaz A, Hontoria Galán M, Refoyo Roman I. The Impact of Covid-19 and the Effect of Psychological Factors on Training Conditions of Handball Players. <i>Int J Environ Res Public Health.</i> 2020 Sep 5;17(18):6471. doi: 10.3390/ijerph17186471.                                                                                                                                                                                                                     |
| Monteiro et al., 2021      | Monteiro R, Rocha NB, Fernandes S. Are Emotional and Behavioral Problems of Infants and Children Aged Younger Than 7 Years Related to Screen Time Exposure During the Coronavirus Disease 2019 Confinement? An Exploratory Study in Portugal. <i>Front Psychol.</i> 2021 Feb 26;12:590279. doi: 10.3389/fpsyg.2021.590279.                                                                                                                                                                     |
| Moore et al., 2020         | Moore SA, Faulkner G, Rhodes RE, Brussoni M, Chulak-Bozzer T, Ferguson LJ, Mitra R, O'Reilly N, Spence JC, Vanderloo LM, Tremblay MS. Impact of the COVID-19 virus outbreak on movement and play behaviours of Canadian children and youth: a national survey. <i>Int J Behav Nutr Phys Act.</i> 2020 Jul 6;17(1):85. doi: 10.1186/s12966-020-00987-8.                                                                                                                                         |
| Munasinghe et al., 2020    | Munasinghe S, Sperandei S, Freebairn L, Conroy E, Jani H, Marjanovic S, Page A. The Impact of Physical Distancing Policies During the COVID-19 Pandemic on Health and Well-Being Among Australian Adolescents. <i>J Adolesc Health.</i> 2020 Nov;67(5):653-661. doi: 10.1016/j.jadohealth.2020.08.008.                                                                                                                                                                                         |
| Murphy et al., 2020        | Murphy B, Benson T, McCloat A, Mooney E, Elliott C, Dean M, Lavelle F. Changes in Consumers' Food Practices during the COVID-19 Lockdown, Implications for Diet Quality and the Food System: A Cross-Continental Comparison. <i>Nutrients.</i> 2020 Dec 23;13(1):20. doi: 10.3390/nu13010020.                                                                                                                                                                                                  |
| Nathan et al., 2021        | Nathan A, George P, Ng M, Wenden E, Bai P, Phiri Z, Christian H. Impact of COVID-19 Restrictions on Western Australian Children's Physical Activity and Screen Time. <i>Int J Environ Res Public Health.</i> 2021 Mar 5;18(5):2583. doi: 10.3390/ijerph18052583.                                                                                                                                                                                                                               |
| Naughton et al., 2021      | Naughton F, Ward E, Khondoker M, Belderson P, Marie Minihane A, Dainty J, Hanson S, Holland R, Brown T, Notley C. Health behaviour change during the UK COVID-19 lockdown: Findings from the first wave of the C-19 health behaviour and well-being daily tracker study. <i>Br J Health Psychol.</i> 2021 May;26(2):624-643. doi: 10.1111/bjhp.12500.                                                                                                                                          |
| Neill et al., 2020         | Neill E, Meyer D, Toh WL, van Rheenen TE, Phillipou A, Tan EJ, Rossell SL. Alcohol use in Australia during the early days of the COVID-19 pandemic: Initial results from the COL-LATE project. <i>Psychiatry Clin Neurosci.</i> 2020 Oct;74(10):542-549. doi: 10.1111/pcn.13099.                                                                                                                                                                                                               |
| Niela-Vilén et al., 2021   | Niela-Vilén H, Auxier J, Ekholm E, Sarhaddi F, Asgari Mehrabadi M, Mahmoudzadeh A, Azimi I, Liljeberg P, Rahmani AM, Axelin A. Pregnant women's daily patterns of well-being before and during the COVID-19 pandemic in Finland: Longitudinal monitoring through smartwatch technology. <i>PLoS One.</i> 2021 Feb 3;16(2):e0246494. doi: 10.1371/journal.pone.0246494.                                                                                                                         |
| Nienhuis et al., 2020      | Nienhuis CP, Lesser IA. The Impact of COVID-19 on Women's Physical Activity Behavior and Mental Well-Being. <i>Int J Environ Res Public Health.</i> 2020 Dec 4;17(23):9036. doi: 10.3390/ijerph17239036.                                                                                                                                                                                                                                                                                       |
| Nieto et al., 2020         | Nieto R, Pardo R, Sora B, Feliu-Soler A, Luciano JV. Impact of COVID-19 Lockdown Measures on Spanish People with Chronic Pain: An Online Study Survey. <i>J Clin Med.</i> 2020 Nov 5;9(11):3558. doi: 10.3390/jcm9113558.                                                                                                                                                                                                                                                                      |
| Oldham et al., 2021        | Oldham M, Garnett C, Brown J, Kale D, Shahab L, Herbec A. Characterising the patterns of and factors associated with increased alcohol consumption since COVID-19 in a UK sample. <i>Drug Alcohol Rev.</i> 2021 Mar 3;10.1111/dar.13256. doi: 10.1111/dar.13256.                                                                                                                                                                                                                               |
| Ong et al., 2021           | Ong JL, Lau T, Massar SAA, Chong ZT, Ng BKL, Koek D, Zhao W, Yeo BTT, Cheong K, Chee MWL. COVID-19-related mobility reduction: heterogenous effects on sleep and physical activity rhythms. <i>Sleep.</i> 2021 Feb 12;44(2):zsaa179. doi: 10.1093/sleep/zsaa179.                                                                                                                                                                                                                               |
| Panagiotidis et al., 2020  | Panagiotidis P, Rantis K, Holeva V, Parlapani E, Diakogiannis I. Changes in Alcohol Use Habits in the General Population, during the COVID-19 Lockdown in Greece. <i>Alcohol Alcohol.</i> 2020 Oct 20;55(6):702-704. doi: 10.1093/alcalc/agaa092.                                                                                                                                                                                                                                              |
| Papandreou et al., 2020    | Papandreou C, Arijia V, Aretouli E, Tsilidis KK, Bulló M. Comparing eating behaviours, and symptoms of depression and anxiety between Spain and Greece during the COVID-19 outbreak: Cross-sectional analysis of two different confinement strategies. <i>Eur Eat Disord Rev.</i> 2020 Nov;28(6):836-846. doi: 10.1002/erv.2772.                                                                                                                                                               |
| Pabst et al., 2021         | Pabst A, Bollen Z, Creupelandt C, Fontesse S, Maurage P. Alcohol consumption changes following COVID-19 lockdown among French-speaking Belgian individuals at risk for alcohol use disorder. <i>Prog Neuropsychopharmacol Biol Psychiatry.</i> 2021 Feb 12;110:110282. doi: 10.1016/j.pnpbp.2021.110282.                                                                                                                                                                                       |
| Pellegrini et al., 2020    | Pellegrini CA, Webster J, Hahn KR, Leblond TL, Unick JL. Relationship between stress and weight management behaviors during the COVID-19 pandemic among those enrolled in an internet program. <i>Obes Sci Pract.</i> 2020 Nov 1;7(1):129-134. doi: 10.1002/osp4.465.                                                                                                                                                                                                                          |
| Pérez et al., 2021         | Pérez LM, Castellano-Tejedor C, Cesari M, Soto-Bagaria L, Ars J, Zambom-Ferraresi F, Baró S, Díaz-Gallego F, Vilaró J, Enfedaque MB, Espi-Valbó P, Inzitari M. Depressive Symptoms, Fatigue and Social Relationships Influenced Physical Activity in Frail Older Community-Dwellers during the Spanish Lockdown due to the COVID-19 Pandemic. <i>Int J Environ Res Public Health.</i> 2021 Jan 19;18(2):808. doi: 10.3390/ijerph18020808.                                                      |
| Pérez-Rodrigo et al., 2021 | Pérez-Rodrigo C, Gianzo Citores M, Hervás Bárbara G, Ruiz-Litago F, Casis Sáenz L, Arijia V, López-Sobaler AM, Martínez de Victoria E, Ortega RM, Partearroyo T, Quiles-Izquierdo J, Ribas-Barba L, Rodríguez-Martín A, Salvador Castell G, Tur JA, Varela-Moreiras G, Serra-Majem L, Aranceta-Bartrina J. Patterns of Change in Dietary Habits and Physical Activity during Lockdown in Spain Due to the COVID-19 Pandemic. <i>Nutrients.</i> 2021 Jan 21;13(2):300. doi: 10.3390/nu13020300. |
| Philippe et al., 2021      | Philippe K, Chabanet C, Issanchou S, Monnery-Patris S. Child eating behaviors, parental feeding practices and food shopping motivations during the COVID-19 lockdown in France: (How) did they change? <i>Appetite.</i> 2021 Jun 1;161:105132. doi: 10.1016/j.appet.2021.105132.                                                                                                                                                                                                               |
| Phillipou et al., 2020     | Phillipou A, Meyer D, Neill E, Tan EJ, Toh WL, Van Rheenen TE, Rossell SL. Eating and exercise behaviors in eating disorders and the general population during the COVID-19 pandemic in Australia: Initial results from the COLLATE project. <i>Int J Eat Disord.</i> 2020 Jul;53(7):1158-1165. doi: 10.1002/eat.23317.                                                                                                                                                                        |

| Study                           | Reference                                                                                                                                                                                                                                                                                                                                                                                                                                                                                                                                    |
|---------------------------------|----------------------------------------------------------------------------------------------------------------------------------------------------------------------------------------------------------------------------------------------------------------------------------------------------------------------------------------------------------------------------------------------------------------------------------------------------------------------------------------------------------------------------------------------|
| Picco et al., 2020              | PICCO, J., GONZÁLEZ DÁVILA, E., GONZÁLEZ DÁVILA, E., WOLFF, S., WOLFF, S., GÓMEZ, V., GÓMEZ, V., WOLFF, D., WOLFF, D.. Psychosocial aspects of the COVID-19 pandemic in the Mendoza population. <i>Argentine Journal of Cardiology, North America</i> , 88, may. 2020.                                                                                                                                                                                                                                                                       |
| Pirutinsky et al., 2021         | Pirutinsky S, Cherniak AD, Rosmarin DH. COVID-19, Religious Coping, and Weight Change in the Orthodox Jewish Community. <i>J Relig Health</i> . 2021 Apr;60(2):646-653. doi: 10.1007/s10943-021-01196-8.                                                                                                                                                                                                                                                                                                                                     |
| Pišot et al., 2020              | Pišot S, Milovanović I, Šimunić B, Gentile A, Bosnar K, Prot F, Bianco A, Lo Coco G, Bartoluci S, Katović D, Bakalár P, Kovalik Slančová T, Tlučáková L, Casals C, Feka K, Christogianni A, Drid P. Maintaining everyday life praxis in the time of COVID-19 pandemic measures (ELP-COVID-19 survey). <i>Eur J Public Health</i> . 2020 Dec 11;30(6):1181-1186. doi: 10.1093/eurpub/ckaa157.                                                                                                                                                 |
| Poelman et al., 2021            | Poelman MP, Gillebaart M, Schlinkert C, Dijkstra SC, Derksen E, Mensink F, Hermans RCJ, Aardening P, de Ridder D, de Vet E. Eating behavior and food purchases during the COVID-19 lockdown: A cross-sectional study among adults in the Netherlands. <i>Appetite</i> . 2021 Feb 1;157:105002. doi: 10.1016/j.appet.2020.105002.                                                                                                                                                                                                             |
| Poskute et al., 2021            | Poskute AS, Nzesi A, Geliebter A. Changes in food intake during the COVID-19 pandemic in New York City. <i>Appetite</i> . 2021 Mar 3;163:105191. doi: 10.1016/j.appet.2021.105191.                                                                                                                                                                                                                                                                                                                                                           |
| Puccinelli et al., 2021         | Puccinelli PJ, Costa TS, Seffrin A, de Lira CAB, Vancini RL, Knechtle B, Nikolaidis PT, Andrade MS. Physical Activity Levels and Mental Health during the COVID-19 Pandemic: Preliminary Results of a Comparative Study between Convenience Samples from Brazil and Switzerland. <i>Medicina (Kaunas)</i> . 2021 Jan 8;57(1):48. doi: 10.3390/medicina57010048.                                                                                                                                                                              |
| Puccinelli et al., 2021         | Puccinelli PJ, da Costa TS, Seffrin A, de Lira CAB, Vancini RL, Nikolaidis PT, Knechtle B, Rosemann T, Hill L, Andrade MS. Reduced level of physical activity during COVID-19 pandemic is associated with depression and anxiety levels: an internet-based survey. <i>BMC Public Health</i> . 2021 Mar 1;21(1):425. doi: 10.1186/s12889-021-10470-z.                                                                                                                                                                                         |
| Qi e tal., 2020                 | Qi M, Li P, Moyle W, Weeks B, Jones C. Physical Activity, Health-Related Quality of Life, and Stress among the Chinese Adult Population during the COVID-19 Pandemic. <i>Int J Environ Res Public Health</i> . 2020 Sep 7;17(18):6494. doi: 10.3390/ijerph17186494.                                                                                                                                                                                                                                                                          |
| Qin e tal., 2020                | Qin F, Song Y, Nassis GP, Zhao L, Dong Y, Zhao C, Feng Y, Zhao J. Physical Activity, Screen Time, and Emotional Well-Being during the 2019 Novel Coronavirus Outbreak in China. <i>Int J Environ Res Public Health</i> . 2020 Jul 17;17(14):5170. doi: 10.3390/ijerph17145170.                                                                                                                                                                                                                                                               |
| Radtke et al., 2020             | Radtke T, Haile SR, Dressel H, Benden C. Recommended shielding against COVID-19 impacts physical activity levels in adults with cystic fibrosis. <i>J Cyst Fibros</i> . 2020 Nov;19(6):875-879. doi: 10.1016/j.jcf.2020.08.013.                                                                                                                                                                                                                                                                                                              |
| Reyes-Olavarria et al., 2020    | Reyes-Olavarria D, Latorre-Román PÁ, Guzmán-Guzmán IP, Jerez-Mayorga D, Caamaño-Navarrete F, Delgado-Floody P. Positive and Negative Changes in Food Habits, Physical Activity Patterns, and Weight Status during COVID-19 Confinement: Associated Factors in the Chilean Population. <i>Int J Environ Res Public Health</i> . 2020 Jul 28;17(15):5431. doi: 10.3390/ijerph17155431.                                                                                                                                                         |
| Rezende et al., 2021            | Rezende DAN, Pinto AJ, Goessler KF, Nicoletti CF, Sieczkowska SM, Meireles K, Esteves GP, Genario R, Oliveira Júnior GN, Santo MA, de Cleva R, Roschel H, Gualano B. Influence of Adherence to Social Distancing Due to the COVID-19 Pandemic on Physical Activity Level in Post-bariatric Patients. <i>Obes Surg</i> . 2021 Mar;31(3):1372-1375. doi: 10.1007/s11695-020-05044-8.                                                                                                                                                           |
| Rhodes et al., 2020             | Rhodes RE, Liu S, Lithopoulos A, Zhang CQ, Garcia-Barrera MA. Correlates of Perceived Physical Activity Transitions during the COVID-19 Pandemic among Canadian Adults. <i>Appl Psychol Health Well Being</i> . 2020 Dec;12(4):1157-1182. doi: 10.1111/aphw.12236.                                                                                                                                                                                                                                                                           |
| Richardson et al., 2021         | Richardson DL, Duncan MJ, Clarke ND, Myers TD, Tallis J. The influence of COVID-19 measures in the United Kingdom on physical activity levels, perceived physical function and mood in older adults: A survey-based observational study. <i>J Sports Sci</i> . 2021 Apr;39(8):887-899. doi: 10.1080/02640414.2020.1850984.                                                                                                                                                                                                                   |
| Roberts et al., 2020            | Roberts C, Gill N, Sims S. The Influence of COVID-19 Lockdown Restrictions on Perceived Nutrition Habits in Rugby Union Players. <i>Front Nutr</i> . 2020 Oct 26;7:589737. doi: 10.3389/fnut.2020.589737.                                                                                                                                                                                                                                                                                                                                    |
| Robinson et al., 2020a          | Robinson E, Boyland E, Chisholm A, Harrold J, Maloney NG, Marty L, Mead BR, Noonan R, Hardman CA. Obesity, eating behavior and physical activity during COVID-19 lockdown: A study of UK adults. <i>Appetite</i> . 2021 Jan 1;156:104853. doi: 10.1016/j.appet.2020.104853.                                                                                                                                                                                                                                                                  |
| Robinson et al., 2020           | Robinson E, Gillespie S, Jones A. Weight-related lifestyle behaviours and the COVID-19 crisis: An online survey study of UK adults during social lockdown. <i>Obes Sci Pract</i> . 2020 Aug 12;6(6):735-740. doi: 10.1002/osp4.442.                                                                                                                                                                                                                                                                                                          |
| Rodríguez-González et al., 2020 | Rodríguez-González R, Facal D, Martínez-Santos AE, Gandoy-Crego M. Psychological, Social and Health-Related Challenges in Spanish Older Adults During the Lockdown of the COVID-19 First Wave. <i>Front Psychiatry</i> . 2020 Dec 3;11:588949. doi: 10.3389/fpsy.2020.588949.                                                                                                                                                                                                                                                                |
| Rodríguez-Larrad et al., 2021   | Rodríguez-Larrad A, Mañas A, Labayen I, González-Gross M, Espin A, Aznar S, Serrano-Sánchez JA, Vera-García FJ, González-Lamuño D, Ara I, Carrasco-Páez L, Castro-Piñero J, Gómez-Cabrera MC, Márquez S, Tur JA, Gusi N, Benito PJ, Moliner-Urdiales D, Ruiz JR, Ortega FB, Jiménez-Pavón D, Casajús JA, Irazusta J. Impact of COVID-19 Confinement on Physical Activity and Sedentary Behaviour in Spanish University Students: Role of Gender. <i>Int J Environ Res Public Health</i> . 2021 Jan 6;18(2):369. doi: 10.3390/ijerph18020369. |
| Rodríguez-Pérez et al., 2020    | Rodríguez-Pérez C, Molina-Montes E, Verardo V, Artacho R, García-Villanova B, Guerra-Hernández EJ, Ruiz-López MD. Changes in Dietary Behaviours during the COVID-19 Outbreak Confinement in the Spanish COVIDiet Study. <i>Nutrients</i> . 2020 Jun 10;12(6):1730. doi: 10.3390/nu12061730.                                                                                                                                                                                                                                                  |
| Rogers et al., 2020             | Rogers NT, Waterlow NR, Brindle H, Enria L, Eggo RM, Lees S, Roberts CH. Behavioral Change Towards Reduced Intensity Physical Activity Is Disproportionately Prevalent Among Adults With Serious Health Issues or Self-Perception of High Risk During the UK COVID-19 Lockdown. <i>Front Public Health</i> . 2020 Sep 30;8:575091. doi: 10.3389/fpubh.2020.575091.                                                                                                                                                                           |

| Study                        | Reference                                                                                                                                                                                                                                                                                                                                                                                                                                                                                                                                                                                    |
|------------------------------|----------------------------------------------------------------------------------------------------------------------------------------------------------------------------------------------------------------------------------------------------------------------------------------------------------------------------------------------------------------------------------------------------------------------------------------------------------------------------------------------------------------------------------------------------------------------------------------------|
| Rogowska et al., 2020        | Rogowska AM, Pavlova I, Kuśnierz C, Ochnik D, Bodnar I, Petrytsa P. Does Physical Activity Matter for the Mental Health of University Students during the COVID-19 Pandemic? J Clin Med. 2020 Oct 29;9(11):3494. doi: 10.3390/jcm9113494.                                                                                                                                                                                                                                                                                                                                                    |
| Rolland et al., 2020         | Rolland B, Haesebaert F, Zante E, Benyamina A, Haesebaert J, Franck N. Global Changes and Factors of Increase in Caloric/Salty Food Intake, Screen Use, and Substance Use During the Early COVID-19 Containment Phase in the General Population in France: Survey Study. JMIR Public Health Surveill. 2020 Sep 18;6(3):e19630. doi: 10.2196/19630.                                                                                                                                                                                                                                           |
| Rossinot et al., 2020        | Rossinot H, Fantin R, Venne J. Behavioral Changes During COVID-19 Confinement in France: A Web-Based Study. Int J Environ Res Public Health. 2020 Nov 14;17(22):8444. doi: 10.3390/ijerph17228444.                                                                                                                                                                                                                                                                                                                                                                                           |
| Rowlands et al., 2021        | Rowlands AV, Henson JJ, Coull NA, Edwardson CL, Brady E, Hall A, Khunti K, Davies M, Yates T. The impact of COVID-19 restrictions on accelerometer-assessed physical activity and sleep in individuals with type 2 diabetes. Diabet Med. 2021 Mar 1:e14549. doi: 10.1111/dme.14549.                                                                                                                                                                                                                                                                                                          |
| Ruiz-Roso et al., 2020a      | Ruiz-Roso MB, de Carvalho Padilha P, Mantilla-Escalante DC, Ulloa N, Brun P, Acevedo-Correa D, Arantes Ferreira Peres W, Martorell M, Aires MT, de Oliveira Cardoso L, Carrasco-Marín F, Paternina-Sierra K, Rodriguez-Meza JE, Montero PM, Bernabé G, Pauletto A, Taci X, Visioli F, Dávalos A. Covid-19 Confinement and Changes of Adolescent's Dietary Trends in Italy, Spain, Chile, Colombia and Brazil. Nutrients. 2020 Jun 17;12(6):1807. doi: 10.3390/nu12061807.                                                                                                                    |
| Ruiz-Roso et al., 2020b      | Ruiz-Roso MB, de Carvalho Padilha P, Matilla-Escalante DC, Brun P, Ulloa N, Acevedo-Correa D, Arantes Ferreira Peres W, Martorell M, Rangel Bousquet Carrilho T, de Oliveira Cardoso L, Carrasco-Marín F, Paternina-Sierra K, Lopez de Las Hazas MC, Rodriguez-Meza JE, Villalba-Montero LF, Bernabé G, Pauletto A, Taci X, Cárcamo-Regla R, Martínez JA, Dávalos A. Changes of Physical Activity and Ultra-Processed Food Consumption in Adolescents from Different Countries during Covid-19 Pandemic: An Observational Study. Nutrients. 2020 Jul 30;12(8):2289. doi: 10.3390/nu12082289. |
| Sá et al., 2020              | Sá CDSC, Pombo A, Luz C, Rodrigues LP, Cordovil R. COVID-19 SOCIAL ISOLATION IN BRAZIL: EFFECTS ON THE PHYSICAL ACTIVITY ROUTINE OF FAMILIES WITH CHILDREN. Rev Paul Pediatr. 2020 Nov 11;39:e2020159. doi: 10.1590/1984-0462/2021/39/2020159.                                                                                                                                                                                                                                                                                                                                               |
| Sallie et al., 2020          | Sallie SN, Ritou V, Bowden-Jones H, Voon V. Assessing international alcohol consumption patterns during isolation from the COVID-19 pandemic using an online survey: highlighting negative emotionality mechanisms. BMJ Open. 2020 Nov 26;10(11):e044276. doi: 10.1136/bmjopen-2020-044276.                                                                                                                                                                                                                                                                                                  |
| Sánchez et al., 2021         | Sánchez E, Lecube A, Bellido D, Monereo S, Malagón MM, Tinahones FJ, On Behalf Of The Spanish Society For The Study Of Obesity. Leading Factors for Weight Gain during COVID-19 Lockdown in a Spanish Population: A Cross-Sectional Study. Nutrients. 2021 Mar 10;13(3):894. doi: 10.3390/nu13030894.                                                                                                                                                                                                                                                                                        |
| Sánchez-Sánchez et al., 2020 | Sánchez-Sánchez E, Ramírez-Vargas G, Avellaneda-López Y, Orellana-Pecino JI, García-Marín E, Díaz-Jimenez J. Eating Habits and Physical Activity of the Spanish Population during the COVID-19 Pandemic Period. Nutrients. 2020 Sep 15;12(9):2826. doi: 10.3390/nu12092826.                                                                                                                                                                                                                                                                                                                  |
| Santana et al., 2021         | Santana JDM, Milagres MP, Silva Dos Santos C, Brazil JM, Lima ER, Pereira M. Dietary intake of university students during COVID-19 social distancing in the Northeast of Brazil and associated factors. Appetite. 2021 Jul 1;162:105172. doi: 10.1016/j.appet.2021.105172.                                                                                                                                                                                                                                                                                                                   |
| Scacchi et al., 2021         | Scacchi A, Catozzi D, Boietti E, Bert F, Siliquini R. COVID-19 Lockdown and Self-Perceived Changes of Food Choice, Waste, Impulse Buying and Their Determinants in Italy: QuarantEat, a Cross-Sectional Study. Foods. 2021 Feb 2;10(2):306. doi: 10.3390/foods10020306.                                                                                                                                                                                                                                                                                                                      |
| Scarmozzino & Visioli, 2020  | Scarmozzino F, Visioli F. Covid-19 and the Subsequent Lockdown Modified Dietary Habits of Almost Half the Population in an Italian Sample. Foods. 2020 May 25;9(5):675. doi: 10.3390/foods9050675.                                                                                                                                                                                                                                                                                                                                                                                           |
| Schlichtiger et al., 2021    | Schlichtiger J, Steffen J, Huber BC, Brunner S. Physical activity during COVID-19 lockdown in older adults. J Sports Med Phys Fitness. 2021 Jan;61(1):164-166. doi: 10.23736/S0022-4707.20.11726-2.                                                                                                                                                                                                                                                                                                                                                                                          |
| Schmidt et al., 2021         | Schmidt T, Pawlowski CS. Physical Activity in Crisis: The Impact of COVID-19 on Danes' Physical Activity Behavior. Front Sports Act Living. 2021 Feb 1;2:610255. doi: 10.3389/fspor.2020.610255.                                                                                                                                                                                                                                                                                                                                                                                             |
| Schmits & Glowacz, 2021      | Schmits E, Glowacz F. Changes in Alcohol Use During the COVID-19 Pandemic: Impact of the Lockdown Conditions and Mental Health Factors. Int J Ment Health Addict. 2021 Jan 4;1-12. doi: 10.1007/s11469-020-00432-8.                                                                                                                                                                                                                                                                                                                                                                          |
| Schnitzer et al., 2020       | Schnitzer M, Schöttl SE, Kopp M, Barth M. COVID-19 stay-at-home order in Tyrol, Austria: sports and exercise behaviour in change? Public Health. 2020 Aug;185:218-220. doi: 10.1016/j.puhe.2020.06.042.                                                                                                                                                                                                                                                                                                                                                                                      |
| Sciberras et al., 2020       | Sciberras E, Patel P, Stokes MA, Coghill D, Middeldorp CM, Bellgrove MA, Becker SP, Efron D, Stringaris A, Faraone SV, Bellows ST, Quach J, Banaschewski T, McGilivray J, Hutchinson D, Silk TJ, Melvin G, Wood AG, Jackson A, Loram G, Engel L, Montgomery A, Westrupp E. Physical Health, Media Use, and Mental Health in Children and Adolescents With ADHD During the COVID-19 Pandemic in Australia. J Atten Disord. 2020 Dec 17:1087054720978549. doi: 10.1177/1087054720978549.                                                                                                       |
| Shinohara et al., 2021       | Shinohara T, Saida K, Tanaka S, Murayama A. Association between frailty and changes in lifestyle and physical or psychological conditions among older adults affected by the coronavirus disease 2019 countermeasures in Japan. Geriatr Gerontol Int. 2021 Jan;21(1):39-42. doi: 10.1111/ggi.14092.                                                                                                                                                                                                                                                                                          |
| Shrestha et al., 2020        | Shrestha, Carmina & Acharya, Sajjan & Sharma, Raksha & Khanal, Roja & Joshi, Jasmin & Ghimire, Calvin & Bhandari, Prakriti & Agrawal, Aditi. (2020). Changes and Compromises in Health Choices during COVID-19 Lockdown in Kathmandu Valley: A Descriptive Cross-sectional Study. Journal of Nepal Medical Association. 58. 10.31729/jnma.5790.                                                                                                                                                                                                                                              |
| Serin & Koç, 2020            | Emre Serin, Mustafa Can Koç. Examination of the eating behaviours and depression states of the university students who stay at home during the coronavirus pandemic in terms of different variables. Progress in Nutrition 2020; Vol. 22, Supplement 1: 33-43. DOI: 10.23751/pn.v22i1-S.9780                                                                                                                                                                                                                                                                                                 |

| Study                        | Reference                                                                                                                                                                                                                                                                                                                                                                                                    |
|------------------------------|--------------------------------------------------------------------------------------------------------------------------------------------------------------------------------------------------------------------------------------------------------------------------------------------------------------------------------------------------------------------------------------------------------------|
| Sfendla & Hadrya, 2020       | Sfendla A, Hadrya F. Factors Associated with Psychological Distress and Physical Activity During the COVID-19 Pandemic. <i>Health Secur.</i> 2020 Dec;18(6):444-453. doi: 10.1089/hs.2020.0062.                                                                                                                                                                                                              |
| Sidor et al., 2020           | Sidor A, Rzymiski P. Dietary Choices and Habits during COVID-19 Lockdown: Experience from Poland. <i>Nutrients.</i> 2020 Jun 3;12(6):1657. doi: 10.3390/nu12061657.                                                                                                                                                                                                                                          |
| Siegle et al., 2020          | Siegle CBH, Pombo A, Luz C, Rodrigues LP, Cordovil R, Sá CDSC. INFLUENCES OF FAMILY AND HOUSEHOLD CHARACTERISTICS ON CHILDREN'S LEVEL OF PHYSICAL ACTIVITY DURING SOCIAL DISTANCING DUE TO COVID-19 IN BRAZIL. <i>Rev Paul Pediatr.</i> 2020 Dec 7;39:e2020297. doi: 10.1590/1984-0462/2021/39/2020297.                                                                                                      |
| Silva et al., 2020           | Silva LRB, Seguro CS, de Oliveira CGA, Santos POS, de Oliveira JCM, de Souza Filho LFM, de Paula Júnior CA, Gentil P, Rebelo ACS. Physical Inactivity Is Associated With Increased Levels of Anxiety, Depression, and Stress in Brazilians During the COVID-19 Pandemic: A Cross-Sectional Study. <i>Front Psychiatry.</i> 2020 Nov 17;11:565291. doi: 10.3389/fpsy.2020.565291.                             |
| Sinha et al., 2020           | Sinha M, Pande B, Sinha R. Impact of COVID-19 lockdown on sleep-wake schedule and associated lifestyle related behavior: A national survey. <i>J Public Health Res.</i> 2020 Jul 28;9(3):1826. doi: 10.4081/jphr.2020.1826.                                                                                                                                                                                  |
| Solé et al., 2021            | Solé B, Verdolini N, Amoretti S, Montejo L, Rosa AR, Hogg B, Garcia-Rizo C, Mezquida G, Bernardo M, Martinez-Aran A, Vieta E, Torrent C. Effects of the COVID-19 pandemic and lockdown in Spain: comparison between community controls and patients with a psychiatric disorder. Preliminary results from the BRIS-MHC STUDY. <i>J Affect Disord.</i> 2021 Feb 15;281:13-23. doi: 10.1016/j.jad.2020.11.099. |
| Spence et al., 2021          | Spence JC, Rhodes RE, McCurdy A, Mangan A, Hopkins D, Mummery WK. Determinants of physical activity among adults in the United Kingdom during the COVID-19 pandemic: The DUK-COVID study. <i>Br J Health Psychol.</i> 2021 May;26(2):588-605. doi: 10.1111/bjhp.12497.                                                                                                                                       |
| Szajnoga et al., 2020        | Szajnoga D, Klimek-Tulwin M, Piekut A. COVID-19 lockdown leads to changes in alcohol consumption patterns. Results from the Polish national survey. <i>J Addict Dis.</i> 2021 Apr-Jun;39(2):215-225. doi: 10.1080/10550887.2020.1848247.                                                                                                                                                                     |
| Ten Velde et al., 2021       | Ten Velde G, Lubrecht J, Arayess L, van Loo C, Hesselink M, Reijnders D, Vreugdenhil A. Physical activity behaviour and screen time in Dutch children during the COVID-19 pandemic: Pre-, during- and post-school closures. <i>Pediatr Obes.</i> 2021 Feb 23:e12779. doi: 10.1111/ijpo.12779.                                                                                                                |
| Theis et al., 2021           | Theis N, Campbell N, De Leeuw J, Owen M, Schenke KC. The effects of COVID-19 restrictions on physical activity and mental health of children and young adults with physical and/or intellectual disabilities. <i>Disabil Health J.</i> 2021 Jan 22:101064. doi: 10.1016/j.dhjo.2021.101064.                                                                                                                  |
| Tulchin-Francis et al., 2021 | Tulchin-Francis, Kirsten & Stevens, Wilshaw & Gu, Xiangli & Zhang, Tao & Roberts, Heather & Keller, Jean & Dempsey, Dana & Borchard, Justine & Jeans, Kelly & VanPelt, Jonathan. (2021). The impact of the COVID-19 pandemic on physical activity in US children. <i>Journal of Sport and Health Science.</i> 10.1016/j.jshs.2021.02.005.                                                                    |
| Ugbohue et al., 2020         | Ugbohue UC, Duclos M, Urzeala C, Berthon M, Kulik K, Bota A, Thivel D, Bagheri R, Gu Y, Baker JS, Andant N, Pereira B, Rouffiac K, Clinchamps M, Dutheil F, On Behalf Of The Covistress Network. An Assessment of the Novel COVISTRESS Questionnaire: COVID-19 Impact on Physical Activity, Sedentary Action and Psychological Emotion. <i>J Clin Med.</i> 2020 Oct 19;9(10):3352. doi: 10.3390/jcm9103352.  |
| Van Bakel et al., 2021       | van Bakel BMA, Bakker EA, de Vries F, Thijssen DHJ, Eijssvogels TMH. Impact of COVID-19 lockdown on physical activity and sedentary behaviour in Dutch cardiovascular disease patients. <i>Neth Heart J.</i> 2021 May;29(5):273-279. doi: 10.1007/s12471-021-01550-1.                                                                                                                                        |
| van der Heide et al., 2020   | van der Heide A, Meinders MJ, Bloem BR, Helmich RC. The Impact of the COVID-19 Pandemic on Psychological Distress, Physical Activity, and Symptom Severity in Parkinson's Disease. <i>J Parkinsons Dis.</i> 2020;10(4):1355-1364. doi: 10.3233/JPD-202251.                                                                                                                                                   |
| Van Rheeunen et al., 2020    | Van Rheeunen TE, Meyer D, Neill E, Phillipou A, Tan EJ, Toh WL, Rossell SL. Mental health status of individuals with a mood-disorder during the COVID-19 pandemic in Australia: Initial results from the COLLATE project. <i>J Affect Disord.</i> 2020 Oct 1;275:69-77. doi: 10.1016/j.jad.2020.06.037.                                                                                                      |
| Vanderbruggen et al., 2020   | Vanderbruggen N, Matthys F, Van Laere S, Zeeuws D, Santermans L, Van den Amele S, Crunelle CL. Self-Reported Alcohol, Tobacco, and Cannabis Use during COVID-19 Lockdown Measures: Results from a Web-Based Survey. <i>Eur Addict Res.</i> 2020;26(6):309-315. doi: 10.1159/000510822.                                                                                                                       |
| Vetrovsky et al., 2020       | Vetrovsky T, Frybova T, Gant I, Semerad M, Cimler R, Bunc V, Siranec M, Miklikova M, Vesely J, Griva M, Precek J, Pelouch R, Parenica J, Belohlavek J. The detrimental effect of COVID-19 nationwide quarantine on accelerometer-assessed physical activity of heart failure patients. <i>ESC Heart Fail.</i> 2020 Oct;7(5):2093-2097. doi: 10.1002/ehf2.12916.                                              |
| Waleździak et al., 2020      | Waleździak M, Różańska-Waleździak A, Pędziwiatr M, Szeliga J, Proczko-Stepaniak M, Wysocki M, Stefura T, Major P. Bariatric Surgery During COVID-19 Pandemic from Patients' Point of View-The Results of a National Survey. <i>J Clin Med.</i> 2020 Jun 2;9(6):1697. doi: 10.3390/jcm9061697.                                                                                                                |
| Wang et al., 2020            | Wang X, Lei SM, Le S, Yang Y, Zhang B, Yao W, Gao Z, Cheng S. Bidirectional Influence of the COVID-19 Pandemic Lockdowns on Health Behaviors and Quality of Life among Chinese Adults. <i>Int J Environ Res Public Health.</i> 2020 Aug 2;17(15):5575. doi: 10.3390/ijerph17155575.                                                                                                                          |
| Weerakoon et al., 2020       | Weerakoon SM, Jetelina KK, Knell G. Longer time spent at home during COVID-19 pandemic is associated with binge drinking among US adults. <i>Am J Drug Alcohol Abuse.</i> 2021 Jan 2;47(1):98-106. doi: 10.1080/00952990.2020.1832508.                                                                                                                                                                       |
| Werneck et al., 2021a        | Werneck AO, Silva DR, Malta DC, Gomes CS, Souza-Júnior PR, Azevedo LO, Barros MB, Szwarcwald CL. Associations of sedentary behaviours and incidence of unhealthy diet during the COVID-19 quarantine in Brazil. <i>Public Health Nutr.</i> 2021 Feb;24(3):422-426. doi: 10.1017/S1368980020004188.                                                                                                           |
| Werneck et al., 2021b        | Werneck AO, Silva DR, Malta DC, Souza-Júnior PRB, Azevedo LO, Barros MBA, Szwarcwald CL. Changes in the clustering of unhealthy movement behaviors during the COVID-19 quarantine and the association with mental health indicators among Brazilian adults. <i>Transl Behav Med.</i> 2021 Mar 16;11(2):323-331. doi: 10.1093/tbm/ibaa095.                                                                    |

| Study                  | Reference                                                                                                                                                                                                                                                                                                                                                                                                                                                                                      |
|------------------------|------------------------------------------------------------------------------------------------------------------------------------------------------------------------------------------------------------------------------------------------------------------------------------------------------------------------------------------------------------------------------------------------------------------------------------------------------------------------------------------------|
| Werneck et al., 2020a  | Werneck AO, Silva DR, Malta DC, Souza-Júnior PRB, Azevedo LO, Barros MBA, Szwarcwald CL. Physical inactivity and elevated TV-viewing reported changes during the COVID-19 pandemic are associated with mental health: A survey with 43,995 Brazilian adults. J Psychosom Res. 2021 Jan;140:110292. doi: 10.1016/j.jpsychores.2020.110292. Epub 2020 Nov 10.                                                                                                                                    |
| Werneck et al., 2020b  | Werneck AO, Silva DR, Malta DC, Souza-Júnior PRB, Azevedo LO, Barros MBA, Szwarcwald CL. Lifestyle behaviors changes during the COVID-19 pandemic quarantine among 6,881 Brazilian adults with depression and 35,143 without depression. Cien Saude Colet. 2020 Oct;25(suppl 2):4151-4156. doi: 10.1590/1413-812320202510.2.27862020.                                                                                                                                                          |
| Wichaidit et al., 2021 | Wichaidit W, Sittisombut M, Assanangkornchai S, Vichitkunakorn P. Self-reported drinking behaviors and observed violation of state-mandated social restriction and alcohol control measures during the COVID-19 pandemic: Findings from nationally-representative surveys in Thailand. Drug Alcohol Depend. 2021 Apr 1;221:108607. doi: 10.1016/j.drugalcdep.2021.108607.                                                                                                                      |
| Wilke et al., 2021     | Wilke J, Mohr L, Tenforde AS, Edouard P, Fossati C, González-Gross M, Sánchez Ramírez C, Laiño F, Tan B, Pillay JD, Pigozzi F, Jimenez-Pavon D, Novak B, Jaunig J, Zhang M, van Poppel M, Heidt C, Willwacher S, Yuki G, Lieberman DE, Vogt L, Verhagen E, Hespanhol L, Hollander K. A Pandemic within the Pandemic? Physical Activity Levels Substantially Decreased in Countries Affected by COVID-19. Int J Environ Res Public Health. 2021 Feb 24;18(5):2235. doi: 10.3390/ijerph18052235. |
| Wilson et al., 2021    | Wilson JJ, McMullan I, Blackburn NE, Klempel N, Yakkundi A, Armstrong NC, Brolly C, Butler LT, Barnett Y, Jacob L, Koyanagi A, Smith L, Tully MA. Changes in dietary fat intake and associations with mental health in a UK public sample during the COVID-19 pandemic. J Public Health (Oxf). 2021 Mar 1;fdab009. doi: 10.1093/pubmed/fdab009.                                                                                                                                                |
| Winkler et al., 2020   | Winkler P, Formanek T, Mlada K, Kagstrom A, Mohrova Z, Mohr P, Csemy L. Increase in prevalence of current mental disorders in the context of COVID-19: analysis of repeated nationwide cross-sectional surveys. Epidemiol Psychiatr Sci. 2020 Sep 29;29:e173. doi: 10.1017/S2045796020000888.                                                                                                                                                                                                  |
| Wood et al., 2021      | Wood CJ, Barton J, Smyth N. A cross-sectional study of physical activity behaviour and associations with wellbeing during the UK coronavirus lockdown. J Health Psychol. 2021 Mar 3;1359105321999710. doi: 10.1177/1359105321999710.                                                                                                                                                                                                                                                           |
| Yan et al., 2020       | Yan AF, Sun X, Zheng J, Mi B, Zuo H, Ruan G, Hussain A, Wang Y, Shi Z. Perceived risk, behavior changes and Health-related outcomes during COVID-19 pandemic: Findings among adults with and without diabetes in China. Diabetes Res Clin Pract. 2020 Sep;167:108350. doi: 10.1016/j.diabres.2020.108350.                                                                                                                                                                                      |
| Yang et al., 2020      | Yang S, Guo B, Ao L, Yang C, Zhang L, Zhou J, Jia P. Obesity and activity patterns before and during COVID-19 lockdown among youths in China. Clin Obes. 2020 Dec;10(6):e12416. doi: 10.1111/cob.12416.                                                                                                                                                                                                                                                                                        |
| Zach et al., 2021      | Zach S, Zeev A, Ophir M, Eilat-Adar S. Physical activity, resilience, emotions, moods, and weight control of older adults during the COVID-19 global crisis. Eur Rev Aging Phys Act. 2021 Mar 1;18(1):5. doi: 10.1186/s11556-021-00258-w.                                                                                                                                                                                                                                                      |
| Zachary et al., 2020   | Zachary Z, Brianna F, Brianna L, Garrett P, Jade W, Alyssa D, Mikayla K. Self-quarantine and weight gain related risk factors during the COVID-19 pandemic. Obes Res Clin Pract. 2020 May-Jun;14(3):210-216. doi: 10.1016/j.orcp.2020.05.004.                                                                                                                                                                                                                                                  |
| Zhang et al., 2020     | Zhang J, Zhang Y, Huo S, Ma Y, Ke Y, Wang P, Zhao A. Emotional Eating in Pregnant Women during the COVID-19 Pandemic and Its Association with Dietary Intake and Gestational Weight Gain. Nutrients. 2020 Jul 28;12(8):2250. doi: 10.3390/nu12082250.                                                                                                                                                                                                                                          |
| Zhao et al., 2020      | Zhao A, Li Z, Ke Y, Huo S, Ma Y, Zhang Y, Zhang J, Ren Z. Dietary Diversity among Chinese Residents during the COVID-19 Outbreak and Its Associated Factors. Nutrients. 2020 Jun 6;12(6):1699. doi: 10.3390/nu12061699.                                                                                                                                                                                                                                                                        |
| Zheng et al., 2020     | Zheng C, Huang WY, Sheridan S, Sit CH, Chen XK, Wong SH. COVID-19 Pandemic Brings a Sedentary Lifestyle in Young Adults: A Cross-Sectional and Longitudinal Study. Int J Environ Res Public Health. 2020 Aug 19;17(17):6035. doi: 10.3390/ijerph17176035.                                                                                                                                                                                                                                      |
| Zhou et al., 2021      | Zhou J, Xie X, Guo B, Pei R, Pei X, Yang S, Jia P. Impact of COVID-19 Lockdown on Physical Activity Among the Chinese Youths: The COVID-19 Impact on Lifestyle Change Survey (COINLICS). Front Public Health. 2021 Feb 4;9:592795. doi: 10.3389/fpubh.2021.592795.                                                                                                                                                                                                                             |
| Zorcec et al., 2020    | Zorcec T, Jakovska T, Micevska V, Boskovska K, Cholakovska VC. Pandemic with COVID-19 and Families with Children with Chronic Respiratory Diseases. Pril (Makedon Akad Nauk Umet Odd Med Nauki). 2020 Sep 1;41(2):95-101. doi: 10.2478/prilozi-2020-0038.                                                                                                                                                                                                                                      |

### S2.1.3 EXCLUDED FULLTEXTS – REASON: STUDY DESIGN

| Study               | Reference                                                                                                                                                                                                     |
|---------------------|---------------------------------------------------------------------------------------------------------------------------------------------------------------------------------------------------------------|
| Anonymus, 2021      | Corrigendum to: Comparison of physical activity levels in Spanish adults with chronic conditions before and during COVID-19 quarantine. Eur J Public Health. 2021 Mar 13;ckab005. doi: 10.1093/eupub/ckab005. |
| Abbas & Kamel, 2020 | Abbas AM, Kamel MM. Dietary habits in adults during quarantine in the context of COVID-19 pandemic. Obes Med. 2020 Sep;19:100254. doi: 10.1016/j.obmed.2020.100254.                                           |

| Study                         | Reference                                                                                                                                                                                                                                                                                                                                                                                                                                                         |
|-------------------------------|-------------------------------------------------------------------------------------------------------------------------------------------------------------------------------------------------------------------------------------------------------------------------------------------------------------------------------------------------------------------------------------------------------------------------------------------------------------------|
| Agababian et al., 2020        | A. S. Aghababian, K.; Jansen, E.; Thapaliya, G.; Sadler, J.; Baltimore, Md L. C.; Carnell, S. Binge watching during COVID: Associations with stress and body weight. <i>Obesity</i> ; 28:10-10, 2020.                                                                                                                                                                                                                                                             |
| Atesyakar et al., 2020        | Atesyakar, Nilay & Ecevitoglu, Alev & Duman, Elif. (2020). Preliminary findings on the impact of COVID-19 pandemic on mood and daily routines of women from the BABIP birth cohort. <i>Psychoneuroendocrinology</i> . 119. 104965. 10.1016/j.psyneuen.2020.104965                                                                                                                                                                                                 |
| Balanzá-Martínez et al., 2020 | Balanzá-Martínez V, Atienza-Carbonell B, Kapczinski F, De Boni RB. Lifestyle behaviours during the COVID-19 - time to connect. <i>Acta Psychiatr Scand</i> . 2020 May;141(5):399-400. doi: 10.1111/acps.13177.                                                                                                                                                                                                                                                    |
| Balducci & Coccia, 2021       | Balducci S, Coccia EM. Sedentariness and physical activity in type 2 diabetes during the COVID-19 pandemic. <i>Diabetes Metab Res Rev</i> . 2021 Feb;37(2):e3378. doi: 10.1002/dmrr.3378.                                                                                                                                                                                                                                                                         |
| Baysun & Akar, 2020           | Baysun Ş, Akar MN. WEIGHT GAIN IN CHILDREN DURING THE COVID-19 QUARANTINE PERIOD. <i>J Paediatr Child Health</i> . 2020 Sep;56(9):1487-1488. doi: 10.1111/jpc.15105.                                                                                                                                                                                                                                                                                              |
| Bian, 2020                    | Bian Y. Epidemic-specific social capital and its impact on physical activity and health status. <i>J Sport Health Sci</i> . 2020 Sep;9(5):426-429. doi: 10.1016/j.jshs.2020.07.009.                                                                                                                                                                                                                                                                               |
| Branley-Bell & Talbot, 2020   | Branley-Bell D, Talbot CV. Exploring the impact of the COVID-19 pandemic and UK lockdown on individuals with experience of eating disorders. <i>J Eat Disord</i> . 2020 Aug 31;8:44. doi: 10.1186/s40337-020-00319-y.                                                                                                                                                                                                                                             |
| Brigugino et al., 2020        | Briguglio M, Giorgino R, Dell'Osso B, Cesari M, Porta M, Lattanzio F, Banfi G, Peretti GM. Consequences for the Elderly After COVID-19 Isolation: FEaR (Frail Elderly amid Restrictions). <i>Front Psychol</i> . 2020 Sep 28;11:565052. doi: 10.3389/fpsyg.2020.565052.                                                                                                                                                                                           |
| Bhutani et al., 2020          | S. V. D. Bhutani, M.; Haskins, L. A.; Cooper, J. Psychological/health factors may alter energy balance behaviors during covid-19 home confinement. <i>Obesity</i> ; 28:145-145, 2020.                                                                                                                                                                                                                                                                             |
| Calcaterra et al., 2020       | Calcaterra V, Vandoni M, Pellino VC, Cena H. Special Attention to Diet and Physical Activity in Children and Adolescents With Obesity During the Coronavirus Disease-2019 Pandemic. <i>Front Pediatr</i> . 2020 Jun 26;8:407. doi: 10.3389/fped.2020.00407.                                                                                                                                                                                                       |
| Iho & Gois, 2020              | Iho VO, Gois CO. COVID-19 pandemic and home-based physical activity. <i>J Allergy Clin Immunol Pract</i> . 2020 Sep;8(8):2833-2834. doi: 10.1016/j.jaip.2020.05.018.                                                                                                                                                                                                                                                                                              |
| Cetin et al., 2020            | Cetin, S. Y., Buyuk, A., Gencer, G. Y. G. Investigation of leisure time activities and anxiety in elderly of Non-Covid living at home during COVID-19 period. <i>European Geriatric Medicine</i> 2020; 11 (SUPPL 1): S96                                                                                                                                                                                                                                          |
| Chague et al., 2021           | Chague, Frederic & Boulon, M. & Eicher, Jean-Christophe & Bichat, Florence & Saint-Jalmes, M. & Cransac, A. & Trojak, B. & Soudry-Faure, Agnès & Danchin, N. & Cottin, Y. & Zeller, Marianne. (2021). Alarming increased rate of smoking and associated lifestyle behaviours in patients with chronic cardiac diseases during COVID-19 pandemic related lockdown. <i>Archives of Cardiovascular Diseases Supplements</i> . 13. 127. 10.1016/j.acvdsp.2020.10.265. |
| Chaves et al., 2020           | Chaves, R. & Correia, L. & Ramalho, R. & Pereira, Paula. (2020). Food habits and body image perception changes during Covid-19 pandemic in Portugal. <i>Clinical Nutrition ESPEN</i> . 40. 620. 10.1016/j.clnesp.2020.09.643.                                                                                                                                                                                                                                     |
| Chen et al., 2020             | Chen F, Zheng D, Liu J, Gong Y, Guan Z, Lou D. Depression and anxiety among adolescents during COVID-19: A cross-sectional study. <i>Brain Behav Immun</i> . 2020 Aug;88:36-38. doi: 10.1016/j.bbi.2020.05.061.                                                                                                                                                                                                                                                   |
| Chen-Sankey et al., 2020      | Chen-Sankey JC, Broun A, Duarte DA, Ajith A, Jewett B, Smiley SL, Mead-Morse EL, Guy MC, Choi K. Exploring changes in cigar smoking patterns and motivations to quit cigars among black young adults in the time of COVID-19. <i>Addict Behav Rep</i> . 2020 Nov 12;12:100317. doi: 10.1016/j.abrep.2020.100317.                                                                                                                                                  |
| Clemmensen et al., 2020       | Clemmensen C, Petersen MB, Sørensen TIA. Will the COVID-19 pandemic worsen the obesity epidemic? <i>Nat Rev Endocrinol</i> . 2020 Sep;16(9):469-470. doi: 10.1038/s41574-020-0387-z.                                                                                                                                                                                                                                                                              |
| Cooper et al., 2021           | Cooper JA, vanDellen M, Bhutani S. Self-weighing Practices and Associated Health Behaviors during COVID-19. <i>Am J Health Behav</i> . 2021 Jan 1;45(1):17-30. doi: 10.5993/AJHB.45.1.2.                                                                                                                                                                                                                                                                          |
| de la Cámara et al., 2020     | de la Cámara MÁ, Jiménez-Fuente A, Pardos-Sevilla AI. Confinement time due to the COVID-19 disease: An opportunity to promote and engage people in regular physical exercise? <i>Transl Sports Med</i> . 2020 May 29;10.1002/tsm2.170. doi: 10.1002/tsm2.170.                                                                                                                                                                                                     |
| Ding et al., 2020             | Ding D, Del Pozo Cruz B, Green MA, Bauman AE. Is the COVID-19 lockdown nudging people to be more active: a big data analysis. <i>Br J Sports Med</i> . 2020 Oct;54(20):1183-1184. doi: 10.1136/bjsports-2020-102575.                                                                                                                                                                                                                                              |
| Gaiha et al., 2021            | Gaiha, Shivani & Lempert, Lauren & McKelvey, Karma & Halpern-Felsher, Bonnie. (2021). 109. Adolescent E-Cigarette Use and Access Before and During the COVID-19 Pandemic. <i>Journal of Adolescent Health</i> . 68. S57. 10.1016/j.jadohealth.2020.12.118.                                                                                                                                                                                                        |
| García-Álvarez et al., 2020   | García-Álvarez L, Fuente-Tomás L, Sáiz PA, García-Portilla MP, Bobes J. Will changes in alcohol and tobacco use be seen during the COVID-19 lockdown? <i>Adicciones</i> . 2020 Apr 1;32(2):85-89. English, Spanish. doi: 10.20882/adicciones.1546.                                                                                                                                                                                                                |
| Grogan et al., 2020           | Grogan S, Walker L, McChesney G, Gee I, Gough B, Cordero MI. How has COVID-19 lockdown impacted smoking? A thematic analysis of written accounts from UK smokers. <i>Psychol Health</i> . 2020 Dec 18;1-17. doi: 10.1080/08870446.2020.1862110.                                                                                                                                                                                                                   |
| Gupta & Nebhinani, 2020       | Tanu Gupta, Naresh Nebhinani. Impact of COVID-19 pandemic on child and adolescent mental health. <i>Journal of Indian Association for Child and Adolescent Mental Health</i> 2020; 16(3):1-16.                                                                                                                                                                                                                                                                    |

| Study                      | Reference                                                                                                                                                                                                                                                                                                                                                                                                                                                                                                    |
|----------------------------|--------------------------------------------------------------------------------------------------------------------------------------------------------------------------------------------------------------------------------------------------------------------------------------------------------------------------------------------------------------------------------------------------------------------------------------------------------------------------------------------------------------|
| Heymsfield et al., 2020    | Heymsfield, S., Pecoraro, L., Ferruzzi, A., Heo, M., Faith, M., Zoller, T., Antoniazzi, F., Piacentini, G., Nicole Fearnbach, S., Pietrobelli, A. Effects of COVID-19 lockdown on lifestyle behaviors in children with obesity: A longitudinal study. <i>Obesity</i> 2020; 28 (SUPPL 2): 88.                                                                                                                                                                                                                 |
| Hnatiuk, 2020              | Hnatiuk, Anna. (2020). Social Isolation During COVID-19: Are We Facing the Development of a Magnifier for Cardiovascular Risk Factors. <i>Revista Argentina de Cardiologia</i> . 88. 405-406. 10.7775/rac.v88.i5.19081.                                                                                                                                                                                                                                                                                      |
| Igic, 2020                 | Igic, Rajko. (2020). Smoking and COVID-19. <i>Vojnosanitetski pregled</i> . 77. 461-462. 10.2298/VSP2005461I.                                                                                                                                                                                                                                                                                                                                                                                                |
| Jiménez-Pavón et al., 2020 | Jiménez-Pavón D, Carbonell-Baeza A, Lavie CJ. Physical exercise as therapy to fight against the mental and physical consequences of COVID-19 quarantine: Special focus in older people. <i>Prog Cardiovasc Dis</i> . 2020 May-Jun;63(3):386-388. doi: 10.1016/j.pcad.2020.03.009.                                                                                                                                                                                                                            |
| Kosravi, 2021              | Khosravi M. COVID-19 quarantine: Two-way interaction between physical activity and mental health. <i>Eur J Transl Myol</i> . 2021 Jan 14;30(4):9509. doi: 10.4081/ejtm.2020.9509.                                                                                                                                                                                                                                                                                                                            |
| Lakicevic et al., 2020     | Lakicevic N, Moro T, Paoli A, Roklicer R, Trivic T, Cassar S, Drid P. Stay fit, don't quit: Geriatric Exercise Prescription in COVID-19 Pandemic. <i>Aging Clin Exp Res</i> . 2020 Jul;32(7):1209-1210. doi: 10.1007/s40520-020-01588-y.                                                                                                                                                                                                                                                                     |
| Le Brocq et al., 2020      | Le Brocq S, Clare K, Bryant M, Roberts K, Tahrani AA; writing group from Obesity UK; Obesity Empowerment Network; UK Association for the Study of Obesity. Obesity and COVID-19: a call for action from people living with obesity. <i>Lancet Diabetes Endocrinol</i> . 2020 Aug;8(8):652-654. doi: 10.1016/S2213-8587(20)30236-9.                                                                                                                                                                           |
| Leong et al., 2021         | Leong DP, Eikelboom JW, Yusuf S. The Indirect Consequences of the Response to the COVID-19 Pandemic. <i>J Am Coll Cardiol</i> . 2021 Jan 19;77(2):186-188. doi: 10.1016/j.jacc.2020.11.028.                                                                                                                                                                                                                                                                                                                  |
| Lewandowicz et al., 2020   | Lewandowicz, M., Kropinska, S., Tobis, S., Kaluzniak-Szymanowska, A., KrzyminskaSiemaszko, R., Wieczorowska-Tobis, K. The impact of COVID-19 on activity and involvement in social life and quality of life among people 60+ living in Poland, depending on the symptoms of depression. <i>European Geriatric Medicine</i> 2020; 11 (SUPPL 1):S17-18.                                                                                                                                                        |
| MacHorn et al., 2020       | MacHorn, M., Mateo-Abad, M., Vrotsou, K., PenEa, N., Rico, L., Vergara, I. Assessment of health status and lifestyle habits of vulnerable, community-dwelling older adults during the covid-19 confinement. <i>European Geriatric Medicine</i> 2020; 11 (SUPPL 1):S106-7.                                                                                                                                                                                                                                    |
| Mattoli et al., 2020       | Mattoli AV, Nasi M, Cocchi C, Farinetti A. COVID-19 outbreak: impact of the quarantine-induced stress on cardiovascular disease risk burden. <i>Future Cardiol</i> . 2020 Nov;16(6):539-542. doi: 10.2217/fca-2020-0055.                                                                                                                                                                                                                                                                                     |
| Mehrsafar et al., 2020     | Mehrsafar AH, Gazerani P, Moghadam Zadeh A, Jaenes Sánchez JC. Addressing potential impact of COVID-19 pandemic on physical and mental health of elite athletes. <i>Brain Behav Immun</i> . 2020 Jul;87:147-148. doi: 10.1016/j.bbi.2020.05.011.                                                                                                                                                                                                                                                             |
| Middleton et al., 2020     | Middleton, J. T., Konganige, S., Dahaghin, P., Zafar, H., Reddy, A., Martin, C., Thompson, A. A. R., Swift, A. J., Morris, P., Condliffe, R., Morrell, N. W., Kiely, D. G., Toshner, M., Rothman, A. M. Effect of COVID-19 Public Health Measures on Activity and Quality of Life in Patients with Pulmonary Arterial Hypertension. <i>Circulation</i> . Conference: American Heart Association Scientific Sessions, AHA 2020; 142(SUPPL 3)                                                                  |
| Morrison et al., 2020      | Morrison SA, Jurak G, Starc G. Responding to a global pandemic: Republic of Slovenia on maintaining physical activity during self-isolation. <i>Scand J Med Sci Sports</i> . 2020 Aug;30(8):1546-1548. doi: 10.1111/sms.13745.                                                                                                                                                                                                                                                                               |
| Muhammad & Abubakar, 2021  | Muhammad DG, Abubakar IA. COVID-19 lockdown may increase cardiovascular disease risk factors. <i>Egypt Heart J</i> . 2021 Jan 5;73(1):2. doi: 10.1186/s43044-020-00127-4.                                                                                                                                                                                                                                                                                                                                    |
| Murukesu et al., 2021      | Murukesu, Resshaya & Singh, Devinder Kaur Ajit & Shahar, Suzana & Subramaniam, Ponnusamy. (2021). Physical Activity Patterns, Psychosocial Well-Being and Coping Strategies Among Older Persons with Cognitive Frailty of the "WE-RISE" Trial Throughout the COVID-19 Movement Control Order. <i>Clinical Interventions in Aging</i> . 2021. 415-429. 10.2147/CIA.S290851.                                                                                                                                   |
| Nava-gonzalez et al., 2020 | Nava-gonzalez, E., Silva, I. R., Velezquez, R. P., Hunot, C., Olguin, G. Q., Rasgado, M. C., Del Rosario Silva, M., Delgado De La Cruz, A. C., Zarate, B. E. L. J., Lopez, A., Karina, D., De Ciencias Martinez, I. N., Del Sol Huescas Juarez, M. Perceived changes in diet quality and bmi in mexico before and during the covid-19 quarantine. <i>Obesity</i> 2020, 28 (SUPPL 2): 135.                                                                                                                    |
| Nisticò et al., 2021       | Nisticò V, Bertelli S, Tedesco R, Anselmetti S, Priori A, Gambini O, Demartini B. The psychological impact of COVID-19-related lockdown measures among a sample of Italian patients with eating disorders: a preliminary longitudinal study. <i>Eat Weight Disord</i> . 2021 Feb 13:1-7. doi: 10.1007/s40519-021-01137-0.                                                                                                                                                                                    |
| Nyenhuis et al., 2020      | Nyenhuis SM, Greiwe J, Zeiger JS, Nanda A, Cooke A. Exercise and Fitness in the Age of Social Distancing During the COVID-19 Pandemic. <i>J Allergy Clin Immunol Pract</i> . 2020 Jul-Aug;8(7):2152-2155. doi: 10.1016/j.jaip.2020.04.039.                                                                                                                                                                                                                                                                   |
| Odone et al.,              | Odone A, Lugo A, Amerio A, Borroni E, Bosetti C, Carreras G, Cavalleri d'Oro L, Colombo P, Fanucchi T, Ghislandi S, Gorini G, Iacoviello L, Pacifici R, Santucci C, Serafini G, Signorelli C, Stival C, Stuckler D, Tersalvi CA, Gallus S. COVID-19 lockdown impact on lifestyle habits of Italian adults. <i>Acta Biomed</i> . 2020 Jul 20;91(9-S):87-89. doi: 10.23750/abm.v91i9-S.10122.                                                                                                                  |
| Ong et al., 2021           | Ong JL, Lau T, Massar SAA, Chong ZT, Ng BKL, Koek D, Zhao W, Yeo BTT, Cheong K, Chee MWL. COVID-19-related mobility reduction: heterogenous effects on sleep and physical activity rhythms. <i>Sleep</i> . 2021 Feb 12;44(2):zsaa179. doi: 10.1093/sleep/zsaa179                                                                                                                                                                                                                                             |
| Paiva et al., 2020         | Paiva, Teresa & Gaspar, Tania & Silva, Maria-Raquel G. & Feliciano, Amélia & Ramiro, Lucia & Gaspar, Susana & Sampaio, Francisco & Videira, Gabriela & Fonseca, Júlio & Pimentel, Joana & Vaz de Castro, Joana & Reis, Cátia & Simião, Hugo & Clara, Ana & de Sousa, Rute & Guedes de Pinho, Lara & Botelho Guedes, Fábio & Branquinho, Cátia & Tomé, Gina & Matos, Margarida. (2020). Gender differences in health risk behaviors and its correlates during COVID-19 pandemic. 10.13140/RG.2.2.16216.32005. |

| Study                   | Reference                                                                                                                                                                                                                                                                                                                                                                                                             |
|-------------------------|-----------------------------------------------------------------------------------------------------------------------------------------------------------------------------------------------------------------------------------------------------------------------------------------------------------------------------------------------------------------------------------------------------------------------|
| Park et al., 2020       | Park S, Kim B, Lee J. Social Distancing and Outdoor Physical Activity During the COVID-19 Outbreak in South Korea: Implications for Physical Distancing Strategies. <i>Asia Pac J Public Health</i> . 2020 Sep-Oct;32(6-7):360-362. doi: 10.1177/1010539520940929.                                                                                                                                                    |
| Patwardhan, 2020        | Patwardhan P. COVID-19: Risk of increase in smoking rates among England's 6 million smokers and relapse among England's 11 million ex-smokers. <i>BJGP Open</i> . 2020 Jun 23;4(2):bjgpopen20X101067. doi: 10.3399/bjgpopen20X101067.                                                                                                                                                                                 |
| Pecoraro et al., 2020   | Pecoraro L, Dalle Carbonare L, De Franceschi L, Piacentini G, Pietrobelli A. The psychophysical impact that COVID-19 has on children must not be underestimated. <i>Acta Paediatr</i> . 2020 Aug;109(8):1679-1680. doi: 10.1111/apa.15347.                                                                                                                                                                            |
| Pereira et al., 2020    | Pereira, X., Romero-Velez, G., Skendelas, J., Grosser, R., Costinett, S., Creange, C., Moran-Atkin, E., Choi, J., Camacho, D. Effect of City-Wide Lockdown on Early Weight-Loss in Bariatric Patients During the COVID-19 Pandemic. <i>Obesity</i> 2020; 28 (SUPPL 2):84-5.                                                                                                                                           |
| Petroni et al, 2020     | Petroni, M. L., Caretto, A., Pintus, S., Morabito, S., Zuliani, P., Di Carlo, M. S., Sturda, R. A. Factors predicting weight gain during Covid-19 lockdown in patients with obesity: A national survey. <i>Clinical Nutrition ESPEN</i> 2020; 40:659.                                                                                                                                                                 |
| Phd, 2021               | Phd, Andrew. (2021). 78. The Effects of the COVID-19 Pandemic on Physical Activity and Mental Well-Being in Older Adolescents in College. <i>Journal of Adolescent Health</i> . 68. S42. 10.1016/j.jadohealth.2020.12.087.                                                                                                                                                                                            |
| Pitanga et al., 2020    | Pitanga FJG, Beck CC, Pitanga CPS. Physical Activity And Reducing Sedentary Behavior During The Coronavirus Pandemic. <i>Arq Bras Cardiol</i> . 2020 Jun;114(6):1058-1060. English, Portuguese. doi: 10.36660/abc.20200238.                                                                                                                                                                                           |
| Rahman et al., 2020     | Rahman MS, Lassi ZS, Shariful Islam SM. Risks to Bangladeshi children and young people during covid-19 outbreak. <i>BMJ</i> . 2020 Jun 11;369:m2299. doi: 10.1136/bmj.m2299.                                                                                                                                                                                                                                          |
| Reza et al., 2020       | Reza N, DeFilippis EM, Jessup M. Secondary Impact of the COVID-19 Pandemic on Patients With Heart Failure. <i>Circ Heart Fail</i> . 2020 May;13(5):e007219. doi: 10.1161/CIR-CHEARTFAILURE.120.007219.                                                                                                                                                                                                                |
| Rivan et al., 2020      | Rivan, N. F. M., Shahar, S., Singh, D. K. A., Ibrahim, N., Ludin, A. F. M., Yahya, H. M., Sakian, N. I. M., Mahadzir, H., Subramaniam, P., Kamaruddin, M. Z. A., Murukesu, R., Goh, J. W., Malek, M. R. A., Rashid, R. General psychological health status and coping strategies during Lock-down due to COVID-19 outbreak among Malaysian Older Adults. <i>European Geriatric Medicine</i> 2020; 11 (SUPPL 1):S95-6. |
| Rundle et al., 2020     | Rundle AG, Park Y, Herbstman JB, Kinsey EW, Wang YC. COVID-19-Related School Closings and Risk of Weight Gain Among Children. <i>Obesity (Silver Spring)</i> . 2020 Jun;28(6):1008-1009. doi: 10.1002/oby.22813.                                                                                                                                                                                                      |
| Schladen et al., 2020   | Schladen, Manon & Weidemann, Deb & Pizzino, Kenzi & Cassetty, Tami & Grufstedt, Maria & Martinez, Brandon & Boxel, Amanda. (2020). Changes in Physical Activity, Health, and Wellness Experienced by Persons with Neurologic Impairments During the COVID-19 Pandemic. <i>Archives of Physical Medicine and Rehabilitation</i> . 101. e132. 10.1016/j.apmr.2020.10.020.                                               |
| Siddiqui et al., 2020   | Siddiqui, Shafayet & Jakaria, Md. (2020). Lockdown leading obesity and its possible impacts on the second wave of COVID-19. <i>Bangladesh Journal of Medical Science</i> . 2020. 10.3329/bjms.v19i0.48172.                                                                                                                                                                                                            |
| The Lancet, 2020        | The Lancet Gastroenterology Hepatology. Drinking alone: COVID-19, lockdown, and alcohol-related harm. <i>Lancet Gastroenterol Hepatol</i> . 2020 Jul;5(7):625. doi: 10.1016/S2468-1253(20)30159-X.                                                                                                                                                                                                                    |
| Timpka, 2020            | Timpka T. Sport in the tracks and fields of the corona virus: Critical issues during the exit from lockdown. <i>J Sci Med Sport</i> . 2020 Jul;23(7):634-635. doi: 10.1016/j.jsams.2020.05.001.                                                                                                                                                                                                                       |
| Tom et al., 2020        | Tom, M. R., Dearborn-Tomazos, J. L. Impact of covid-19-related physical distancing on mental and physical health of people with recent stroke. <i>Annals of Neurology</i> 2020; 88 (SUPPL 25): S91-2.                                                                                                                                                                                                                 |
| Udigwe et al., 2021     | Udigwe, Ifeoma & Mbachu, Chioma & Onukwuli, Vivian & Anyanwu, Onyinye & Mbanuzuru, Ahoma & Umeh, Uche. (2021). 92. The Impact of CORVID-19 on Adolescents and Young People Living in Southeast Nigeria. <i>Journal of Adolescent Health</i> . 68. S49. 10.1016/j.jadohealth.2020.12.101.                                                                                                                              |
| Undela et al., 2020     | P.B, S. & Undela, Krishna & R.K.Puvavada, & Gupta, Balaji & Manohar Rao, Kishor. (2020). To Assess the psychological impact of COVID-19 lockdown among healthy individuals in India. <i>Value in Health</i> . 23. S589. 10.1016/j.jval.2020.08.1107.                                                                                                                                                                  |
| Usman & Fahy, 2020      | Usman M, Fahy S. Coping with the COVID-19 crisis: an overview of service adaptation and challenges encountered by a rural Psychiatry of Later Life (POLL) team. <i>Ir J Psychol Med</i> . 2020 Jul 2:1-5. doi: 10.1017/ipm.2020.86.                                                                                                                                                                                   |
| Valenzuela et al., 2020 | Valenzuela PL, Santos-Lozano A, Lista S, Serra-Rexach JA, Emanuele E, Lucia A. Coronavirus Lockdown: Forced Inactivity for the Oldest Old? <i>J Am Med Dir Assoc</i> . 2020 Jul;21(7):988-989. doi: 10.1016/j.jamda.2020.03.026.                                                                                                                                                                                      |
| Wang et al., 2020       | Wang, Y., Shi, Z., Yan, A., Zheng, J., Xue, Q., Qu, W., Wu, J. COVID-19 pandemic and obesity-related outcomes: A nationwide survey study of 10,139 adults in China. <i>Obesity</i> 2020; 28(SUPPL 2):73.                                                                                                                                                                                                              |
| Yach, 2020              | Yach D. Tobacco Use Patterns in Five Countries During the COVID-19 Lockdown. <i>Nicotine Tob Res</i> . 2020 Aug 24;22(9):1671-1672. doi: 10.1093/ntr/ntaa097.                                                                                                                                                                                                                                                         |
| Yan et al., 2020        | Yan, A., Wang, Y., Sun, X., Zhao, B., Baibing Mi, D., Shi, Z. Physical activity, sedentary behaviors, and weight gain during covid-19 in China. <i>Obesity</i> 2020; 28 (SUPPL 2):137.                                                                                                                                                                                                                                |

## S2.1.4 EXCLUDED FULLTEXTS – REASON: MISSING REFERENCE VALUES

| Study                         | Reference                                                                                                                                                                                                                                                                                                                                                                                                |
|-------------------------------|----------------------------------------------------------------------------------------------------------------------------------------------------------------------------------------------------------------------------------------------------------------------------------------------------------------------------------------------------------------------------------------------------------|
| Abate Daga et al., 2021       | Abate Daga F, Agostino S, Peretti S, Beratto L. COVID-19 nationwide lockdown and physical activity profiles among North-western Italian population using the International Physical Activity Questionnaire (IPAQ). <i>Sport Sci Health</i> . 2021 Mar 4;1-6. doi: 10.1007/s11332-021-00745-8.                                                                                                            |
| Alves et al., 2021            | Alves JM, Yunker AG, DeFendis A, Xiang AH, Page KA. BMI status and associations between affect, physical activity and anxiety among U.S. children during COVID-19. <i>Pediatr Obes</i> . 2021 Mar 15:e12786. doi: 10.1111/jjpo.12786. Epub ahead of print. PMID: 33720550.                                                                                                                               |
| Amatori et al., 2020          | Amatori S, Donati Zeppa S, Preti A, Gervasi M, Gobbi E, Ferrini F, Rocchi MBL, Baldari C, Perroni F, Piccoli G, Stocchi V, Sestili P, Sisti D. Dietary Habits and Psychological States during COVID-19 Home Isolation in Italian College Students: The Role of Physical Exercise. <i>Nutrients</i> . 2020 Nov 28;12(12):3660. doi: 10.3390/nu12123660.                                                   |
| Balanzá-Martínez et al., 2021 | Balanzá-Martínez V, Kapczynski F, de Azevedo Cardoso T, Atienza-Carbonell B, Rosa AR, Mota JC, De Boni RB. The assessment of lifestyle changes during the COVID-19 pandemic using a multidimensional scale. <i>Rev Psiquiatr Salud Ment</i> . 2021 Jan-Mar;14(1):16-26. doi: 10.1016/j.rpsm.2020.07.003.                                                                                                 |
| Barrea et al., 2020           | Barrea L, Pugliese G, Framondi L, Di Matteo R, Laudisio D, Savastano S, Colao A, Muscogiuri G. Does Sars-Cov-2 threaten our dreams? Effect of quarantine on sleep quality and body mass index. <i>J Transl Med</i> . 2020 Aug 18;18(1):318. doi: 10.1186/s12967-020-02465-y.                                                                                                                             |
| Barwais, 2020                 | Barwais, Faisal. (2020). Assessing physical activity and sedentary time during the COVID-19 pandemic using self-reported measurement. <i>National Journal of Physiology, Pharmacy and Pharmacology</i> . 10. 1. 10.5455/njppp.2020.10.09241202001102020.                                                                                                                                                 |
| Boukrim et al., 2021          | Boukrim M, Obtel M, Kasouati J, Achbani A, Razine R. Covid-19 and Confinement: Effect on Weight Load, Physical Activity and Eating Behavior of Higher Education Students in Southern Morocco. <i>Ann Glob Health</i> . 2021 Jan 6;87(1):7. doi: 10.5334/aogh.3144.                                                                                                                                       |
| Budimir et al., 2021          | Budimir S, Probst T, Pieh C. Coping strategies and mental health during COVID-19 lockdown. <i>J Ment Health</i> . 2021 Jan 27:1-8. doi: 10.1080/09638237.2021.1875412.                                                                                                                                                                                                                                   |
| Cachón-Zagalaz et al., 2021   | Cachón-Zagalaz J, Zagalaz-Sánchez M <sup>RL</sup> , Arufe-Giráldez V, Sanmiguel-Rodríguez A, González-Valero G. Physical Activity and Daily Routine among Children Aged 0-12 during the COVID-19 Pandemic in Spain. <i>Int J Environ Res Public Health</i> . 2021 Jan 15;18(2):703. doi: 10.3390/ijerph18020703.                                                                                         |
| Carriedo et al., 2020         | Carriedo A, Cecchini JA, Fernandez-Rio J, Méndez-Giménez A. COVID-19, Psychological Well-being and Physical Activity Levels in Older Adults During the Nationwide Lockdown in Spain. <i>Am J Geriatr Psychiatry</i> . 2020 Nov;28(11):1146-1155. doi: 10.1016/j.jagp.2020.08.007.                                                                                                                        |
| Cecchetto et al., 2021        | Cecchetto C, Aiello M, Gentili C, Ionta S, Osimo SA. Increased emotional eating during COVID-19 associated with lockdown, psychological and social distress. <i>Appetite</i> . 2021 May 1;160:105122. doi: 10.1016/j.appet.2021.105122.                                                                                                                                                                  |
| Di Dalmazi et al., 2020       | Di Dalmazi G, Maltoni G, Bongiorno C, Tucci L, Di Natale V, Moscatiello S, Laffi G, Pession A, Zucchini S, Pagotto U. Comparison of the effects of lockdown due to COVID-19 on glucose patterns among children, adolescents, and adults with type 1 diabetes: CGM study. <i>BMJ Open Diabetes Res Care</i> . 2020 Oct;8(2):e001664. doi: 10.1136/bmjdr-2020-001664.                                      |
| Diniz et al., 2020            | Diniz TA, Christofaro DGD, Tebar WR, Cucato GG, Botero JP, Correia MA, Ritti-Dias RM, Lofrano-Prado MC, Prado WL. Reduction of Physical Activity Levels During the COVID-19 Pandemic Might Negatively Disturb Sleep Pattern. <i>Front Psychol</i> . 2020 Dec 10;11:586157. doi: 10.3389/fpsyg.2020.586157.                                                                                               |
| Dobler et al., 2020           | Dobler CL, Krüger B, Strahler J, Weyh C, Gebhardt K, Tello K, Ghofrani HA, Sommer N, Gall H, Richter MJ, Krüger K. Physical Activity and Mental Health of Patients with Pulmonary Hypertension during the COVID-19 Pandemic. <i>J Clin Med</i> . 2020 Dec 12;9(12):4023. doi: 10.3390/jcm9124023.                                                                                                        |
| Dönmez et al., 2021           | Dönmez G, Özkan Ö, Menderes Y, Torgutalp ŞŞ, Karaçoban L, Denerel N, Kudaş S. The effects of home confinement on physical activity level and mental status in professional football players during COVID-19 outbreak. <i>Phys Sportsmed</i> . 2021 Feb 21:1-7. doi: 10.1080/00913847.2021.1888630.                                                                                                       |
| Dragun et al., 2020           | Dragun R, Veček NN, Marendić M, Pribisalić A, Đivić G, Cena H, Polašek O, Kolčić I. Have Lifestyle Habits and Psychological Well-Being Changed among Adolescents and Medical Students Due to COVID-19 Lockdown in Croatia? <i>Nutrients</i> . 2020 Dec 30;13(1):97. doi: 10.3390/nu13010097.                                                                                                             |
| Flaudias et al., 2020         | Flaudias V, Iceta S, Zerhouni O, Rodgers RF, Billieux J, Llorca PM, Boudesseul J, de Chazeron I, Romo L, Maurage P, Samalin L, Bègue L, Naassila M, Brousse G, Guillaume S. COVID-19 pandemic lockdown and problematic eating behaviors in a student population. <i>J Behav Addict</i> . 2020 Sep 24;9(3):826-835. doi: 10.1556/2006.2020.00053.                                                         |
| Flaudias et al., 2021         | Flaudias V, Zerhouni O, Pereira B, Cherpitel CJ, Boudesseul J, de Chazeron I, Romo L, Guillaume S, Samalin L, Cabe J, Bègue L, Gerbaud L, Rolland B, Llorca PM, Naassila M, Brousse G. The Early Impact of the COVID-19 Lockdown on Stress and Addictive Behaviors in an Alcohol-Consuming Student Population in France. <i>Front Psychiatry</i> . 2021 Feb 9;12:628631. doi: 10.3389/fpsyg.2021.628631. |
| Ginoux et al., 2021           | Ginoux C, Isoard-Gautheur S, Teran-Escobar C, Forestier C, Chalabaev A, Clavel A, Sarrazin P. Being Active during the Lockdown: The Recovery Potential of Physical Activity for Well-Being. <i>Int J Environ Res Public Health</i> . 2021 Feb 10;18(4):1707. doi: 10.3390/ijerph18041707.                                                                                                                |
| Haddad et al., 2020           | Haddad C, Zakhour M, Bou Kheir M, Haddad R, Al Hachach M, Sacre H, Salameh P. Association between eating behavior and quarantine/confinement stressors during the coronavirus disease 2019 outbreak. <i>J Eat Disord</i> . 2020 Sep 1;8:40. doi: 10.1186/s40337-020-00317-0.                                                                                                                             |
| Horigian et al., 2021         | Horigian VE, Schmidt RD, Feaster DJ. Loneliness, Mental Health, and Substance Use among US Young Adults during COVID-19. <i>J Psychoactive Drugs</i> . 2021 Jan-Mar;53(1):1-9. doi: 10.1080/02791072.2020.1836435.                                                                                                                                                                                       |

| Study                       | Reference                                                                                                                                                                                                                                                                                                                                                                                                                                                                                                                                                                                                                            |
|-----------------------------|--------------------------------------------------------------------------------------------------------------------------------------------------------------------------------------------------------------------------------------------------------------------------------------------------------------------------------------------------------------------------------------------------------------------------------------------------------------------------------------------------------------------------------------------------------------------------------------------------------------------------------------|
| Khare & Jindal, 2020        | Khare J, Jindal S. Observational study on Effect of Lock Down due to COVID 19 on glycemic control in patients with Diabetes: Experience from Central India. <i>Diabetes Metab Syndr</i> . 2020 Nov-Dec;14(6):1571-1574. doi: 10.1016/j.dsx.2020.08.012.                                                                                                                                                                                                                                                                                                                                                                              |
| Kilani et al., 2020         | Kilani HA, Bataineh MF, Al-Nawayseh A, Atiyat K, Obeid O, Abu-Hilal MM, Mansi T, Al-Kilani M, Al-Kitani M, El-Saleh M, Jaber RM, Sweidan A, Himsi M, Yousef I, Alzeer F, Nasralah M, Al Dhaheri AS, Al-Za'abi A, Allala O, Al-Kilani L, Alhasan AM, Ghieda M, Najah Y, Alsheekhly S, Alhaifi A, Shukri R, Al Adwani J, Waly M, Kilani L, Kilani LH, Al Shareef AS, Kilani A. Healthy lifestyle behaviors are major predictors of mental wellbeing during COVID-19 pandemic confinement: A study on adult Arabs in higher educational institutions. <i>PLoS One</i> . 2020 Dec 14;15(12):e0243524. doi: 10.1371/journal.pone.0243524. |
| Jacob et al., 2020          | Jacob L, Tully MA, Barnett Y, Lopez-Sanchez GF, Butler L, Schuch F, López-Bueno R, McDermott D, Firth J, Grabovac I, Yakkundi A, Armstrong N, Young T, Smith L. The relationship between physical activity and mental health in a sample of the UK public: A cross-sectional study during the implementation of COVID-19 social distancing measures. <i>Ment Health Phys Act</i> . 2020 Oct;19:100345. doi: 10.1016/j.mhpa.2020.100345.                                                                                                                                                                                              |
| Maertl et al., 2021         | Maertl T, De Bock F, Huebl L, Oberhauser C, Coenen M, Jung-Sievers C, On Behalf Of The Cosmo Study Team. Physical Activity during COVID-19 in German Adults: Analyses in the COVID-19 Snapshot Monitoring Study (COSMO). <i>Int J Environ Res Public Health</i> . 2021 Jan 9;18(2):507. doi: 10.3390/ijerph18020507.                                                                                                                                                                                                                                                                                                                 |
| McDowell et al., 2020       | McDowell CP, Herring MP, Lansing J, Brower C, Meyer JD. Working From Home and Job Loss Due to the COVID-19 Pandemic Are Associated With Greater Time in Sedentary Behaviors. <i>Front Public Health</i> . 2020 Nov 5;8:597619. doi: 10.3389/fpubh.2020.597619.                                                                                                                                                                                                                                                                                                                                                                       |
| Méndez-Giménez et al., 2021 | Méndez-Giménez A, Cecchini JA, Fernández-Río J, Carriedo A. Physical Activity and Prevention of Depressive Symptoms in the Spanish Population during Confinement due to COVID-19. <i>Psicothema</i> . 2021 Feb;33(1):111-117. doi: 10.7334/psicothema2020.294.                                                                                                                                                                                                                                                                                                                                                                       |
| Meyer et al., 2002          | Meyer J, Herring M, McDowell C, Lansing J, Brower C, Schuch F, Smith L, Tully M, Martin J, Caswell S, Cortes N, Boolani A. Joint prevalence of physical activity and sitting time during COVID-19 among US adults in April 2020. <i>Prev Med Rep</i> . 2020 Dec;20:101256. doi: 10.1016/j.pmedr.2020.101256.                                                                                                                                                                                                                                                                                                                         |
| Nicodemo et al., 2021       | Nicodemo M, Spreghini MR, Manco M, Wietrzykowska Sforza R, Morino G. Childhood Obesity and COVID-19 Lockdown: Remarks on Eating Habits of Patients Enrolled in a Food-Education Program. <i>Nutrients</i> . 2021 Jan 26;13(2):383. doi: 10.3390/nu13020383.                                                                                                                                                                                                                                                                                                                                                                          |
| Ozdemir et al., 2020        | Ozdemir F, Cansel N, Kizilay F, Guldogan E, Ucuiz I, Sinanoglu B, Colak C, Cumurcu HB. The role of physical activity on mental health and quality of life during COVID-19 outbreak: A cross-sectional study. <i>Eur J Integr Med</i> . 2020 Dec;40:101248. doi: 10.1016/j.eujim.2020.101248.                                                                                                                                                                                                                                                                                                                                         |
| Panno et al., 2020          | Panno A, Carbone GA, Massullo C, Farina B, Imperatori C. COVID-19 Related Distress Is Associated With Alcohol Problems, Social Media and Food Addiction Symptoms: Insights From the Italian Experience During the Lockdown. <i>Front Psychiatry</i> . 2020 Nov 25;11:577135. doi: 10.3389/fpsy.2020.577135.                                                                                                                                                                                                                                                                                                                          |
| Patel et al., 2020          | Shweta Patel, Manindra Rajak, Kamini Khatak, Ranjana Patnaik, Diwakar Chauhan. ASSESSMENT of IMPACT of COVID-19 (NOVEL CORONA VIRUS DISEASE) on ADULT INDIAN POPULATION: A CROSS SECTIONAL QUESTIONNAIRE BASED SURVEY. <i>European Journal of Molecular &amp; Clinical Medicine</i> , 2020, 7(9):10-23                                                                                                                                                                                                                                                                                                                               |
| Pombo et al., 2020          | Pombo A, Luz C, Rodrigues LP, Ferreira C, Cordovil R. Correlates of children's physical activity during the COVID-19 confinement in Portugal. <i>Public Health</i> . 2020 Dec;189:14-19. doi: 10.1016/j.puhe.2020.09.009.                                                                                                                                                                                                                                                                                                                                                                                                            |
| Rahman et al., 2020         | Rahman ME, Islam MS, Bishwas MS, Moonajilin MS, Gozal D. Physical inactivity and sedentary behaviors in the Bangladeshi population during the COVID-19 pandemic: An online cross-sectional survey. <i>Heliyon</i> . 2020 Oct 30;6(10):e05392. doi: 10.1016/j.heliyon.2020.e05392.                                                                                                                                                                                                                                                                                                                                                    |
| Roe et al., 2021            | Roe A, Blikstad-Balas M, Dalland CP. The Impact of COVID-19 and Homeschooling on Students' Engagement With Physical Activity. <i>Front Sports Act Living</i> . 2021 Jan 26;2:589227. doi: 10.3389/fspor.2020.589227.                                                                                                                                                                                                                                                                                                                                                                                                                 |
| Sang et al., 2021           | Sang X, Menhas R, Saqib ZA, Mahmood S, Weng Y, Khurshid S, Iqbal W, Shahzad B. The Psychological Impacts of COVID-19 Home Confinement and Physical Activity: A Structural Equation Model Analysis. <i>Front Psychol</i> . 2021 Jan 15;11:614770. doi: 10.3389/fpsyg.2020.614770.                                                                                                                                                                                                                                                                                                                                                     |
| Schuch et al., 2020         | Schuch FB, Bulzing RA, Meyer J, Vancampfort D, Firth J, Stubbs B, Grabovac I, Willeit P, Tavares VDO, Calegari VC, Deenik J, López-Sánchez GF, Veronese N, Caperchione CM, Sadarangani KP, Abufaraj M, Tully MA, Smith L. Associations of moderate to vigorous physical activity and sedentary behavior with depressive and anxiety symptoms in self-isolating people during the COVID-19 pandemic: A cross-sectional survey in Brazil. <i>Psychiatry Res</i> . 2020 Oct;292:113339. doi: 10.1016/j.psychres.2020.113339.                                                                                                            |
| Slimani et al., 2020        | Slimani M, Paravlic A, Mbarek F, Bragazzi NL, Tod D. The Relationship Between Physical Activity and Quality of Life During the Confinement Induced by COVID-19 Outbreak: A Pilot Study in Tunisia. <i>Front Psychol</i> . 2020 Aug 7;11:1882. doi: 10.3389/fpsyg.2020.01882.                                                                                                                                                                                                                                                                                                                                                         |
| Smith et al., 2020          | Smith L, Jacob L, Trott M, Yakkundi A, Butler L, Barnett Y, Armstrong NC, McDermott D, Schuch F, Meyer J, López-Bueno R, Sánchez GFL, Bradley D, Tully MA. The association between screen time and mental health during COVID-19: A cross sectional study. <i>Psychiatry Res</i> . 2020 Oct;292:113333. doi: 10.1016/j.psychres.2020.113333.                                                                                                                                                                                                                                                                                         |
| Taeymans et al., 2021       | Taeymans J, Luijckx E, Rogan S, Haas K, Baur H. Physical Activity, Nutritional Habits, and Sleeping Behavior in Students and Employees of a Swiss University During the COVID-19 Lockdown Period: Questionnaire Survey Study. <i>JMIR Public Health Surveill</i> . 2021 Apr 13;7(4):e26330. doi: 10.2196/26330.                                                                                                                                                                                                                                                                                                                      |
| Tao et al., 2020            | Tao J, Gao L, Liu Q, Dong K, Huang J, Peng X, Yang Y, Wang H, Yu X. Factors contributing to glycemic control in diabetes mellitus patients complying with home quarantine during the coronavirus disease 2019 (COVID-19) epidemic. <i>Diabetes Res Clin Pract</i> . 2020 Dec;170:108514. doi: 10.1016/j.diabres.2020.108514.                                                                                                                                                                                                                                                                                                         |
| Totosy et al. 2021          | Totosy de Zepetnek JO, Martin J, Cortes N, Caswell S, Boolani A. Influence of grit on lifestyle factors during the COVID-19 pandemic in a sample of adults in the United States. <i>Pers Individ Dif</i> . 2021 Jun;175:110705. doi: 10.1016/j.paid.2021.110705.                                                                                                                                                                                                                                                                                                                                                                     |

| Study                | Reference                                                                                                                                                                                                                                                                                                                               |
|----------------------|-----------------------------------------------------------------------------------------------------------------------------------------------------------------------------------------------------------------------------------------------------------------------------------------------------------------------------------------|
| Valadez et al., 2020 | Valadez MLD, Rodríguez-Naveiras E, Castellanos-Simons D, López-Aymes G, Aguirre T, Flores JF, Borges Á. Physical Activity and Well-Being of High Ability Students and Community Samples During the COVID-19 Health Alert. <i>Front Psychol.</i> 2020 Dec 21;11:606167. doi: 10.3389/fpsyg.2020.606167.                                  |
| Werneck et al., 2020 | Werneck AO, Silva DR, Malta DC, Lima MG, Souza-Júnior PRB, Azevedo LO, Barros MBA, Szwarcwald CL. The mediation role of sleep quality in the association between the incidence of unhealthy movement behaviors during the COVID-19 quarantine and mental health. <i>Sleep Med.</i> 2020 Dec;76:10-15. doi: 10.1016/j.sleep.2020.09.021. |
| Zhang et al., 2020   | Zhang X, Zhu W, Kang S, Qiu L, Lu Z, Sun Y. Association between Physical Activity and Mood States of Children and Adolescents in Social Isolation during the COVID-19 Epidemic. <i>Int J Environ Res Public Health.</i> 2020 Oct 21;17(20):7666. doi: 10.3390/ijerph17207666.                                                           |
| Zhao et al., 2020    | Zhao Y, Guo Y, Xiao Y, Zhu R, Sun W, Huang W, Liang D, Tang L, Zhang F, Zhu D, Wu JL. The Effects of Online Homeschooling on Children, Parents, and Teachers of Grades 1-9 During the COVID-19 Pandemic. <i>Med Sci Monit.</i> 2020 Sep 12;26:e925591. doi: 10.12659/MSM.925591.                                                        |

### S2.1.5 EXCLUDED FULLTEXTS – REASON: UNCLEAR RECRUITMENT PROCEDURE

| Study                        | Reference                                                                                                                                                                                                                                                                                                                                                                       |
|------------------------------|---------------------------------------------------------------------------------------------------------------------------------------------------------------------------------------------------------------------------------------------------------------------------------------------------------------------------------------------------------------------------------|
| Al Agha et al., 2021         | Al Agha AE, Alharbi RS, Almohammadi OA, Yousef SY, Sulimani AE, Alaama RA. Impact of COVID-19 lockdown on glycemic control in children and adolescents. <i>Saudi Med J.</i> 2021 Jan;42(1):44-48. doi: 10.15537/smj.2021.1.25620.                                                                                                                                               |
| Al Fagih et al., 2020        | Al Fagih A, Al Onazi M, Al Basiri S, Al-Kaf F, Dagriri K, Al Hebaishi Y, Samargandy S, Al Shengeiti L. Remotely monitored inactivity due to COVID-19 lockdowns. Potential hazard for heart failure patients. <i>Saudi Med J.</i> 2020 Nov;41(11):1211-1216. doi: 10.15537/smj.2020.11.25449.                                                                                    |
| Almadoz et al., 2021         | Almadoz JP, Xie L, Schellinger JN, Mathew MS, Bismar N, Ofori A, Kukreja S, Schneider B, Vidot D, Messiah SE. Substance use, mental health and weight-related behaviours during the COVID-19 pandemic in people with obesity. <i>Clin Obes.</i> 2021 Apr;11(2):e12440. doi: 10.1111/cob.12440.                                                                                  |
| Almadoz et al., 2020         | Almadoz JP, Xie L, Schellinger JN, Mathew MS, Gazda C, Ofori A, Kukreja S, Messiah SE. Impact of COVID-19 stay-at-home orders on weight-related behaviours among patients with obesity. <i>Clin Obes.</i> 2020 Oct;10(5):e12386. doi: 10.1111/cob.12386.                                                                                                                        |
| Alonso-Martínez et al., 2021 | Alonso-Martínez AM, Ramírez-Vélez R, García-Alonso Y, Izquierdo M, García-Hermoso A. Physical Activity, Sedentary Behavior, Sleep and Self-Regulation in Spanish Preschoolers during the COVID-19 Lockdown. <i>Int J Environ Res Public Health.</i> 2021 Jan 15;18(2):693. doi: 10.3390/ijerph18020693.                                                                         |
| Alshareef et al., 2020       | Alshareef R, Al Zahrani A, Alzahrani A, Ghandoura L. Impact of the COVID-19 lockdown on diabetes patients in Jeddah, Saudi Arabia. <i>Diabetes Metab Syndr.</i> 2020 Sep-Oct;14(5):1583-1587. doi: 10.1016/j.dsx.2020.07.051.                                                                                                                                                   |
| Arai et al., 2021            | Arai Y, Oguma Y, Abe Y, Takayama M, Hara A, Urushihara H, Takebayashi T. Behavioral changes and hygiene practices of older adults in Japan during the first wave of COVID-19 emergency. <i>BMC Geriatr.</i> 2021 Feb 24;21(1):137. doi: 10.1186/s12877-021-02085-1.                                                                                                             |
| Azizi et al., 2020           | Azizi A, Achak D, Aboudi K, Saad E, Nejari C, Nouri Y, Hilali A, Youlyouz-Marfak I, Marfak A. Health-related quality of life and behavior-related lifestyle changes due to the COVID-19 home confinement: Dataset from a Moroccan sample. <i>Data Brief.</i> 2020 Oct;32:106239. doi: 10.1016/j.dib.2020.106239.                                                                |
| Bailey et al., 2021          | Bailey L, Ward M, DiCosimo A, Baunta S, Cunningham C, Romero-Ortuno R, Kenny RA, Purcell R, Lannon R, McCarroll K, Nee R, Robinson D, Lavan A, Briggs R. Physical and Mental Health of Older People while Cocooning during the COVID-19 Pandemic. <i>QJM.</i> 2021 Jan 20;hcab015. doi: 10.1093/qjmed/hcab015.                                                                  |
| Balci et al., 2021           | Balci B, Aktar B, Buran S, Tas M, Donmez Colakoglu B. Impact of the COVID-19 pandemic on physical activity, anxiety, and depression in patients with Parkinson's disease. <i>Int J Rehabil Res.</i> 2021 Feb 25. doi: 10.1097/MRR.0000000000000460.                                                                                                                             |
| Bonora et al., 2020          | Bonora BM, Boscari F, Avogaro A, Bruttomesso D, Fadini GP. Glycaemic Control Among People with Type 1 Diabetes During Lockdown for the SARS-CoV-2 Outbreak in Italy. <i>Diabetes Ther.</i> 2020 May 11;11(6):1-11. doi: 10.1007/s13300-020-00829-7.                                                                                                                             |
| Brancaccio et al., 2021      | Brancaccio M, Mennitti C, Gentile A, Correale L, Buzzachera CF, Ferraris C, Montomoli C, Frisso G, Borrelli P, Scudiero O. Effects of the COVID-19 Pandemic on Job Activity, Dietary Behaviours and Physical Activity Habits of University Population of Naples, Federico II-Italy. <i>Int J Environ Res Public Health.</i> 2021 Feb 5;18(4):1502. doi: 10.3390/ijerph18041502. |
| Coughenour et al., 2020      | Coughenour C, Gakh M, Pharr JR, Bungum T, Jalene S. Changes in Depression and Physical Activity Among College Students on a Diverse Campus After a COVID-19 Stay-at-Home Order. <i>J Community Health.</i> 2020 Nov 9:1-9. doi: 10.1007/s10900-020-00918-5.                                                                                                                     |
| Elmacioğlu et al., 2021      | Elmacioğlu F, Emiroğlu E, Ülker MT, Özyılmaz Kırca B, Oruç S. Evaluation of nutritional behaviour related to COVID-19. <i>Public Health Nutr.</i> 2021 Feb;24(3):512-518. doi: 10.1017/S1368980020004140.                                                                                                                                                                       |
| Franco et al., 2021          | Franco E, Urosa J, Barakat R, Refoyo I. Physical Activity and Adherence to the Mediterranean Diet among Spanish Employees in a Health-Promotion Program before and during the COVID-19 Pandemic: The Sanitas-Healthy Cities Challenge. <i>Int J Environ Res Public Health.</i> 2021 Mar 8;18(5):2735. doi: 10.3390/ijerph18052735.                                              |

| Study                      | Reference                                                                                                                                                                                                                                                                                                                                                            |
|----------------------------|----------------------------------------------------------------------------------------------------------------------------------------------------------------------------------------------------------------------------------------------------------------------------------------------------------------------------------------------------------------------|
| Ghosal et al., 2020        | Ghosal S, Arora B, Dutta K, Ghosh A, Sinha B, Misra A. Increase in the risk of type 2 diabetes during lockdown for the COVID-19 pandemic in India: A cohort analysis. <i>Diabetes Metab Syndr.</i> 2020 Sep-Oct;14(5):949-952. doi: 10.1016/j.dsx.2020.06.020.                                                                                                       |
| Ghosh et al., 2020         | Ghosh A, Arora B, Gupta R, Anoop S, Misra A. Effects of nationwide lockdown during COVID-19 epidemic on lifestyle and other medical issues of patients with type 2 diabetes in north India. <i>Diabetes Metab Syndr.</i> 2020 Sep-Oct;14(5):917-920. doi: 10.1016/j.dsx.2020.05.044.                                                                                 |
| Glowacz & Schmits, 2020    | Glowacz F, Schmits E. Psychological distress during the COVID-19 lockdown: The young adults most at risk. <i>Psychiatry Res.</i> 2020 Nov;293:113486. doi: 10.1016/j.psy-chres.2020.113486.                                                                                                                                                                          |
| Kim et al., 2020           | Kim JU, Majid A, Judge R, Crook P, Nathwani R, Selvapatt N, Lovendoski J, Manousou P, Thursz M, Dhar A, Lewis H, Vergis N, Lemoine M. Effect of COVID-19 lockdown on alcohol consumption in patients with pre-existing alcohol use disorder. <i>Lancet Gastroenterol Hepatol.</i> 2020 Oct;5(10):886-887. doi: 10.1016/S2468-1253(20)30251-X.                        |
| Majumdar et al., 2020      | Majumdar P, Biswas A, Sahu S. COVID-19 pandemic and lockdown: cause of sleep disruption, depression, somatic pain, and increased screen exposure of office workers and students of India. <i>Chronobiol Int.</i> 2020 Aug;37(8):1191-1200. doi: 10.1080/07420528.2020.1786107.                                                                                       |
| Malanchini et al., 2020    | Malanchini G, Malacrida M, Ferrari P, Leidi C, Ferrari G, Racheli M, Senni M, Filippo P. Impact of the Coronavirus Disease-19 Outbreak on Physical Activity of Patients With Implantable Cardioverter Defibrillators. <i>J Card Fail.</i> 2020 Oct;26(10):898-899. doi: 10.1016/j.cardfail.2020.08.005.                                                              |
| Marco-Ahullo et al., 2021  | Marco-Ahullo A, Montesinos-Magraner L, González LM, Morales J, Bernabéu-García JA, García-Massó X. Impact of COVID-19 on the self-reported physical activity of people with complete thoracic spinal cord injury full-time manual wheelchair users. <i>J Spinal Cord Med.</i> 2021 Jan 19:1-5. doi: 10.1080/10790268.2020.1857490.                                   |
| Marty et al., 2021         | Marty L, de Lauzon-Guillain B, Labesse M, Nicklaus S. Food choice motives and the nutritional quality of diet during the COVID-19 lockdown in France. <i>Appetite.</i> 2021 Feb 1;157:105005. doi: 10.1016/j.appet.2020.105005.                                                                                                                                      |
| McCarthy et al., 2021      | McCarthy H, Potts HWW, Fisher A. Physical Activity Behavior Before, During, and After COVID-19 Restrictions: Longitudinal Smartphone-Tracking Study of Adults in the United Kingdom. <i>J Med Internet Res.</i> 2021 Feb 3;23(2):e23701. doi: 10.2196/23701.                                                                                                         |
| Önmez et al., 2020         | Önmez A, Gamsızkan Z, Özdemir Ş, Kesikbaş E, Gökosmanoğlu F, Torun S, Cinemre H. The effect of COVID-19 lockdown on glycemic control in patients with type 2 diabetes mellitus in Turkey. <i>Diabetes Metab Syndr.</i> 2020 Nov-Dec;14(6):1963-1966. doi: 10.1016/j.dsx.2020.10.007.                                                                                 |
| Pietrobelli et al., 2020   | Pietrobelli A, Pecoraro L, Ferruzzi A, Heo M, Faith M, Zoller T, Antoniazzi F, Piacentini G, Fearnbach SN, Heymsfield SB. Effects of COVID-19 Lockdown on Lifestyle Behaviors in Children with Obesity Living in Verona, Italy: A Longitudinal Study. <i>Obesity (Silver Spring).</i> 2020 Aug;28(8):1382-1385. doi: 10.1002/oby.22861.                              |
| Rastogi et al., 2020       | Rastogi A, Hiteshi P, Bhansali A. Improved glycemic control amongst people with long-standing diabetes during COVID-19 lockdown: a prospective, observational, nested cohort study. <i>Int J Diabetes Dev Ctries.</i> 2020 Oct 21:1-6. doi: 10.1007/s13410-020-00880-x.                                                                                              |
| Romero-Blanco et al., 2020 | Romero-Blanco C, Rodríguez-Almagro J, Onieva-Zafra MD, Parra-Fernández ML, Prado-Laguna MDC, Hernández-Martínez A. Physical Activity and Sedentary Lifestyle in University Students: Changes during Confinement Due to the COVID-19 Pandemic. <i>Int J Environ Res Public Health.</i> 2020 Sep 9;17(18):6567. doi: 10.3390/ijerph17186567.                           |
| Sama et al., 2021          | Sama BK, Kaur P, Thind PS, Verma MK, Kaur M, Singh DD. Implications of COVID-19-induced nationwide lockdown on children's behaviour in Punjab, India. <i>Child Care Health Dev.</i> 2021 Jan;47(1):128-135. doi: 10.1111/cch.12816.                                                                                                                                  |
| Sankar et al., 2020        | Sankar P, Ahmed WN, Mariam Koshy V, Jacob R, Sasidharan S. Effects of COVID-19 lockdown on type 2 diabetes, lifestyle and psychosocial health: A hospital-based cross-sectional survey from South India. <i>Diabetes Metab Syndr.</i> 2020 Nov-Dec;14(6):1815-1819. doi: 10.1016/j.dsx.2020.09.005.                                                                  |
| Sassone et al., 2020       | Sassone B, Mandini S, Grazi G, Mazzoni G, Myers J, Pisanisi G. Impact of COVID-19 Pandemic on Physical Activity in Patients With Implantable Cardioverter-Defibrillators. <i>J Cardiopulm Rehabil Prev.</i> 2020 Sep;40(5):285-286. doi: 10.1097/HCR.0000000000000539.                                                                                               |
| Sisto et al., 2020         | Sisto A, Vicinanza F, Tuccinardi D, Watanabe M, Gallo IF, D'Alessio R, Manfrini S, Quintiliani L. The psychological impact of COVID-19 pandemic on patients included in a bariatric surgery program. <i>Eat Weight Disord.</i> 2020 Aug 28:1-11. doi: 10.1007/s40519-020-00988-3.                                                                                    |
| Srivastav et al., 2021     | Srivastav AK, Sharma N, Samuel AJ. Impact of Coronavirus disease-19 (COVID-19) lockdown on physical activity and energy expenditure among physiotherapy professionals and students using web-based open E-survey sent through WhatsApp, Facebook and Instagram messengers. <i>Clin Epidemiol Glob Health.</i> 2021 Jan-Mar;9:78-84. doi: 10.1016/j.cegh.2020.07.003. |
| Utama et al., 2020         | Utama, Lalu & Yunianto, Andi & Shagti, Indhira & Gressilda, Juni & Sine, Louisa & Agung, Anak & Mirah, Ayu & Loaloka, Meirina & Nur, Astuti. (2020). <i>European Journal of Molecular &amp; Clinical Medicine</i> Impact of the COVID-19 Epidemic on Eating Habits and Lifestyle : An East Nusa Tenggara Survey.                                                     |
| Zhu et al., 2021           | Zhu Q, Li M, Ji Y, Shi Y, Zhou J, Li Q, Qin R, Zhuang X. "Stay-at-Home" Lifestyle Effect on Weight Gain during the COVID-19 Outbreak Confinement in China. <i>Int J Environ Res Public Health.</i> 2021 Feb 12;18(4):1813. doi: 10.3390/ijerph18041813. PMID: 33673375; PMCID: PMC7918476.                                                                           |

## S2.1.6 EXCLUDED FULLTEXTS – REASON: OUTCOME

| Study                  | Reference                                                                                                                                                                                                                                                                                                                                                                                                                                                                                                                                                                              |
|------------------------|----------------------------------------------------------------------------------------------------------------------------------------------------------------------------------------------------------------------------------------------------------------------------------------------------------------------------------------------------------------------------------------------------------------------------------------------------------------------------------------------------------------------------------------------------------------------------------------|
| Alfawaz et al., 2021   | Alfawaz H, Yakout SM, Wani K, Aljumah GA, Ansari MGA, Khattak MNK, Hussain SD, Al-Daghri NM. Dietary Intake and Mental Health among Saudi Adults during COVID-19 Lockdown. <i>Int J Environ Res Public Health</i> . 2021 Feb 9;18(4):1653. doi: 10.3390/ijerph18041653.                                                                                                                                                                                                                                                                                                                |
| Ali et al., 2021       | Ali A, Siddiqui AA, Arshad MS, Iqbal F, Arif TB. Effects of COVID-19 pandemic and lockdown on lifestyle and mental health of students: A retrospective study from Karachi, Pakistan. <i>Ann Med Psychol (Paris)</i> . 2021 Feb 15. doi: 10.1016/j.amp.2021.02.004.                                                                                                                                                                                                                                                                                                                     |
| Al-Musharaf, 2020      | Al-Musharaf S. Prevalence and Predictors of Emotional Eating among Healthy Young Saudi Women during the COVID-19 Pandemic. <i>Nutrients</i> . 2020 Sep 24;12(10):2923. doi: 10.3390/nu12102923. PMID: 32987773; PMCID: PMC7598723.                                                                                                                                                                                                                                                                                                                                                     |
| Ares et al., 2021      | Ares G, Bove I, Vidal L, Brunet G, Fuletti D, Arroyo A, Blanc MV. The experience of social distancing for families with children and adolescents during the coronavirus (COVID-19) pandemic in Uruguay: Difficulties and opportunities. <i>Child Youth Serv Rev</i> . 2021 Feb;121:105906. doi: 10.1016/j.childyouth.2020.105906.                                                                                                                                                                                                                                                      |
| Bade et al., 2020      | Bade R, Simpson BS, Ghetia M, Nguyen L, White JM, Gerber C. Changes in alcohol consumption associated with social distancing and self-isolation policies triggered by COVID-19 in South Australia: a wastewater analysis study. <i>Addiction</i> . 2020 Sep 18;10.1111/add.15256. doi: 10.1111/add.15256.                                                                                                                                                                                                                                                                              |
| Balhara et al., 2020   | Balhara YPS, Singh S, Narang P. Effect of lockdown following COVID-19 pandemic on alcohol use and help-seeking behavior: Observations and insights from a sample of alcohol use disorder patients under treatment from a tertiary care center. <i>Psychiatry Clin Neurosci</i> . 2020 Aug;74(8):440-441. doi: 10.1111/pcn.13075.                                                                                                                                                                                                                                                       |
| Barguilla et al., 2020 | Barguilla A, Fernández-Lebrero A, Estragués-Gázquez I, García-Escobar G, Navalpotro-Gómez I, Manero RM, Puente-Periz V, Roquer J, Puig-Pijoan A. Effects of COVID-19 Pandemic Confinement in Patients With Cognitive Impairment. <i>Front Neurol</i> . 2020 Nov 24;11:589901. doi: 10.3389/fneur.2020.589901.                                                                                                                                                                                                                                                                          |
| Ben-Ezra et al., 2020  | Ben-Ezra M, Sun S, Hou WK, Goodwin R. The association of being in quarantine and related COVID-19 recommended and non-recommended behaviors with psychological distress in Chinese population. <i>J Affect Disord</i> . 2020 Oct 1;275:66-68. doi: 10.1016/j.jad.2020.06.026.                                                                                                                                                                                                                                                                                                          |
| Chirico et al., 2020   | Chirico A, Lucidi F, Galli F, Giancamilli F, Vitale J, Borghi S, La Torre A, Codella R. COVID-19 Outbreak and Physical Activity in the Italian Population: A Cross-Sectional Analysis of the Underlying Psychosocial Mechanisms. <i>Front Psychol</i> . 2020 Aug 21;11:2100. doi: 10.3389/fpsyg.2020.02100.                                                                                                                                                                                                                                                                            |
| Di Renzo et al., 2020  | Di Renzo L, Gualtieri P, Cinelli G, Bigioni G, Soldati L, Attinà A, Bianco FF, Caparello G, Camodeca V, Carrano E, Ferraro S, Giannattasio S, Leggeri C, Rampello T, Lo Presti L, Tarsitano MG, De Lorenzo A. Psychological Aspects and Eating Habits during COVID-19 Home Confinement: Results of EHLC-COVID-19 Italian Online Survey. <i>Nutrients</i> . 2020 Jul 19;12(7):2152. doi: 10.3390/nu12072152.                                                                                                                                                                            |
| Ezpeleta et al., 2020  | Ezpeleta L, Navarro JB, de la Osa N, Trepal E, Penelo E. Life Conditions during COVID-19 Lockdown and Mental Health in Spanish Adolescents. <i>Int J Environ Res Public Health</i> . 2020 Oct 7;17(19):7327. doi: 10.3390/ijerph17197327.                                                                                                                                                                                                                                                                                                                                              |
| Ford, 2021             | Ford MB. Social distancing during the COVID-19 pandemic as a predictor of daily psychological, social, and health-related outcomes. <i>J Gen Psychol</i> . 2021 Jul;148(3):249-271. doi: 10.1080/00221309.2020.1860890.                                                                                                                                                                                                                                                                                                                                                                |
| Głąbska et al., 2020   | Głąbska D, Skolmowska D, Guzek D. Population-Based Study of the Changes in the Food Choice Determinants of Secondary School Students: Polish Adolescents' COVID-19 Experience (PLACE-19) Study. <i>Nutrients</i> . 2020 Aug 30;12(9):2640. doi: 10.3390/nu12092640.                                                                                                                                                                                                                                                                                                                    |
| Gupta et al., 2020     | Gupta R, Grover S, Basu A, Krishnan V, Tripathi A, Subramanyam A, Nischal A, Hussain A, Mehra A, Ambekar A, Saha G, Mishra KK, Bathla M, Jagiwal M, Manjunatha N, Nebhinani N, Gaur N, Kumar N, Dalal PK, Kumar P, Midha PK, Daga R, Tikka SK, Praharaj SK, Goyal SK, Kanchan S, Sarkar S, Das S, Sarkhel S, Padhy SK, Sahoo S, Satyanarayana Rao TS, Dubey V, Menon V, Chhabra V, Lahan V, Avasthi A. Changes in sleep pattern and sleep quality during COVID-19 lockdown. <i>Indian J Psychiatry</i> . 2020 Jul-Aug;62(4):370-378. doi: 10.4103/psychiatry.IndianJPsychiatry_523_20. |
| Kalkan et al., 2021    | Kalkan Uğurlu Y, Mataracı Değirmenci D, Durgun H, Gök Uğur H. The examination of the relationship between nursing students' depression, anxiety and stress levels and restrictive, emotional, and external eating behaviors in COVID-19 social isolation process. <i>Perspect Psychiatr Care</i> . 2021 Apr;57(2):507-516. doi: 10.1111/ppc.12703.                                                                                                                                                                                                                                     |
| Keel et al., 2020      | Keel PK, Gomez MM, Harris L, Kennedy GA, Ribeiro J, Joiner TE. Gaining "The Quarantine 15:" Perceived versus observed weight changes in college students in the wake of COVID-19. <i>Int J Eat Disord</i> . 2020 Nov;53(11):1801-1808. doi: 10.1002/eat.23375.                                                                                                                                                                                                                                                                                                                         |
| Khan et al., 2020      | Khan AH, Sultana MS, Hossain S, Hasan MT, Ahmed HU, Sikder MT. The impact of COVID-19 pandemic on mental health & wellbeing among home-quarantined Bangladeshi students: A cross-sectional pilot study. <i>J Affect Disord</i> . 2020 Dec 1;277:121-128. doi: 10.1016/j.jad.2020.07.135.                                                                                                                                                                                                                                                                                               |
| Li et al., 2021        | Li W, Zhang Y, Wang J, Ozaki A, Wang Q, Chen Y, Jiang Q. Association of Home Quarantine and Mental Health Among Teenagers in Wuhan, China, During the COVID-19 Pandemic. <i>JAMA Pediatr</i> . 2021 Mar 1;175(3):313-316. doi: 10.1001/jamapediatrics.2020.5499.                                                                                                                                                                                                                                                                                                                       |
| Maddaloni et al., 2020 | Maddaloni E, Coraggio L, Pieralice S, Carlone A, Pozzilli P, Buzzetti R. Effects of COVID-19 Lockdown on Glucose Control: Continuous Glucose Monitoring Data From People With Diabetes on Intensive Insulin Therapy. <i>Diabetes Care</i> . 2020 Aug;43(8):e86-e87. doi: 10.2337/dc20-0954.                                                                                                                                                                                                                                                                                            |
| Mamun et al., 2021     | Mamun MA, Sakib N, Gozal D, Bhuiyan AI, Hossain S, Bodrud-Doza M, Al Mamun F, Hosen I, Safiq MB, Abdullah AH, Sarker MA, Rayhan I, Sikder MT, Muhit M, Lin CY, Griffiths MD, Pakpour AH. The COVID-19 pandemic and serious psychological consequences in Bangladesh: A population-based nationwide study. <i>J Affect Disord</i> . 2021 Jan 15;279:462-472. doi: 10.1016/j.jad.2020.10.036.                                                                                                                                                                                            |
| Meda et al., 2021      | Meda N, Pardini S, Slongo I, Bodini L, Zordan MA, Rigobello P, Visioli F, Novara C. Students' mental health problems before, during, and after COVID-19 lockdown in Italy. <i>J Psychiatr Res</i> . 2021 Feb;134:69-77. doi: 10.1016/j.jpsychires.2020.12.045.                                                                                                                                                                                                                                                                                                                         |

| Study                      | Reference                                                                                                                                                                                                                                                                                                                                              |
|----------------------------|--------------------------------------------------------------------------------------------------------------------------------------------------------------------------------------------------------------------------------------------------------------------------------------------------------------------------------------------------------|
| Nilima et al., 2021        | Nilima N, Kaushik S, Tiwary B, Pandey PK. Psycho-social factors associated with the nationwide lockdown in India during COVID- 19 pandemic. Clin Epidemiol Glob Health. 2021 Jan-Mar;9:47-52. doi: 10.1016/j.cegh.2020.06.010.                                                                                                                         |
| Nudelman et al., 2021      | Nudelman G, Peleg S, Shiloh S. The Association Between Healthy Lifestyle Behaviours and Coronavirus Protective Behaviours. Int J Behav Med. 2021 Feb 10;1-9. doi: 10.1007/s12529-021-09960-6.                                                                                                                                                          |
| Owen et al., 2021          | Owen AJ, Tran T, Hammarberg K, Kirkman M, Fisher J; COVID-19 Restrictions Impact Research Group. Poor appetite and overeating reported by adults in Australia during the coronavirus-19 disease pandemic: a population-based study. Public Health Nutr. 2021 Feb;24(2):275-281. doi: 10.1017/S1368980020003833.                                        |
| Santos-García et al., 2020 | Santos-García D, Oreiro M, Pérez P, Fanjul G, Paz González JM, Feal Paineiras MJ, Cores Bartolomé C, Valdés Aymerich L, García Sancho C, Castellanos Rodrigo MDM. Impact of Coronavirus Disease 2019 Pandemic on Parkinson's Disease: A Cross-Sectional Survey of 568 Spanish Patients. Mov Disord. 2020 Oct;35(10):1712-1716. doi: 10.1002/mds.28261. |
| Serafim et al., 2021       | Serafim AP, Durães RSS, Rocca CCA, Gonçalves PD, Saffi F, Cappellozza A, Paulino M, Dumas-Diniz R, Brissos S, Brites R, Alho L, Lotufo-Neto F. Exploratory study on the psychological impact of COVID-19 on the general Brazilian population. PLoS One. 2021 Feb 3;16(2):e0245868. doi: 10.1371/journal.pone.0245868.                                  |
| Serralta et al., 2020      | Serralta FB, Zibetti MR, Evans C. Psychological Distress of University Workers during COVID-19 Pandemic in Brazil. Int J Environ Res Public Health. 2020 Nov 17;17(22):8520. doi: 10.3390/ijerph17228520.                                                                                                                                              |
| Sutin et al., 2021         | Sutin AR, Stephan Y, Luchetti M, Aschwanden D, Strickhouser JE, Lee JH, Sesker AA, Terracciano A. BMI, Weight Discrimination, and the Trajectory of Distress and Well-Being Across the Coronavirus Pandemic. Obesity (Silver Spring). 2021 Jan;29(1):38-45. doi: 10.1002/oby.23048.                                                                    |
| Szczepanek, 2020           | Szczepanek R. Analysis of pedestrian activity before and during COVID-19 lockdown, using webcam time-lapse from Cracow and machine learning. PeerJ. 2020 Oct 5;8:e10132. doi: 10.7717/peerj.10132.                                                                                                                                                     |
| Tasnim et al., 2020        | Tasnim R, Islam MS, Sujan MSH, Sikder MT, Potenza MN. Suicidal ideation among Bangladeshi university students early during the COVID-19 pandemic: Prevalence estimates and correlates. Child Youth Serv Rev. 2020 Dec;119:105703. doi: 10.1016/j.childyouth.2020.105703.                                                                               |
| Termorshuizen et al., 2020 | Termorshuizen JD, Watson HJ, Thornton LM, Borg S, Flatt RE, MacDermid CM, Harper LE, van Furth EF, Peat CM, Bulik CM. Early impact of COVID-19 on individuals with self-reported eating disorders: A survey of ~1,000 individuals in the United States and the Netherlands. Int J Eat Disord. 2020 Nov;53(11):1780-1790. doi: 10.1002/eat.23353.       |
| Zhang et al., 2020         | Zhang M, Li Q, Du X, Zuo D, Ding Y, Tan X, Liu Q. Health Behavior Toward COVID-19: The Role of Demographic Factors, Knowledge, and Attitude Among Chinese College Students During the Quarantine Period. Asia Pac J Public Health. 2020 Nov;32(8):533-535. doi: 10.1177/1010539520951408.                                                              |

### S2.1.7 EXCLUDED FULLTEXTS – REASON: LANGUAGE

| Study                          | Reference                                                                                                                                                                                                                                                                                                                                                                             |
|--------------------------------|---------------------------------------------------------------------------------------------------------------------------------------------------------------------------------------------------------------------------------------------------------------------------------------------------------------------------------------------------------------------------------------|
| Aajal et al., 2021             | Aajal A, El Boussaadani B, Hara L, Benajiba C, Boukhouk O, Benali M, Ouadfel O, Bendoudouch H, Zergoune N, Alkattan D, Mahdi Z, Najdi A, Raissuni Z. Les conséquences du confinement sur les maladies cardiovasculaires [The consequences of the lockdown on cardiovascular diseases]. Ann Cardiol Angeiol (Paris). 2021 Apr;70(2):94-101. French. doi: 10.1016/j.ancard.2021.01.006. |
| Alomo et al., 2020             | Alomo M, Gagliardi G, Pelocche S, Somers E, Alzina P, Prokopez CR. Efectos psicológicos de la pandemia COVID-19 en la población general de Argentina [Psychological effects during the COVID-19 outbreak in Argentina]. Rev Fac Cien Med Univ Nac Cordoba. 2020 Aug 25;77(3):176-181. Spanish. doi: 10.31053/1853.0605.v77.n3.28561.                                                  |
| Arevalo et al., 2020           | Arevalo, Harold & Urina, Miguel & Santacruz, Juan. (2020). Impact of mandatory preventive isolation on daily physical activity and weight of children in Colombia during the SARS-cov-2 pandemic. Revista Colombiana de Cardiología. 10.1016/j.rccar.2020.09.003.                                                                                                                     |
| Durá-Travé, 2021               | Durá-Travé T. Confinamiento domiciliario por COVID-19 y ganancia ponderal en escolares y adolescentes [Home confinement for COVID-19 and weight gain in schoolchildren and adolescents]. Nutr Hosp. 2021 Feb 23;38(1):213-214. Spanish. doi: 10.20960/nh.03417.                                                                                                                       |
| Fosco et al., 2020             | Fosco MJ, Silva P, Taborda GA, Ahumada L. Asociación entre aislamiento social preventivo obligatorio por COVID-19 e hipertensión arterial grave [Association between mandatory lockdown due to COVID-19 and severe arterial hypertension]. Medicina (B Aires). 2020;80 Suppl 6:25-29.                                                                                                 |
| Hartley et al., 2020           | Hartley S, Colas des Francs C, Aussert F, Martinot C, Dagneaux S, Londe V, Waldron L, Royant-Parola S. Les effets de confinement SARS-CoV-2 sur le sommeil : enquête en ligne au cours de la quatrième semaine de confinement [The effects of quarantine for SARS-CoV-2 on sleep: An online survey]. Encephale. 2020 Jun;46(3S):S53-S59. French. doi: 10.1016/j.encep.2020.05.003.    |
| Jauffret-Roustide et al., 2020 | Jauffret-Roustide, M.; Barratt, M.; De Dinechin, S.; Davies, E.; Gilchrist, G.; Hughes, C.; Maier, L.; Ferris, J.; Winstock, A. Consumption of alcohol and other psychoactive drugs during the covid-19 pandemic in the global drug survey: A French perspective. Psychotropes (Belgium); 26(2-3):209-219, 2020.                                                                      |

| Study                          | Reference                                                                                                                                                                                                                                                                                                                                                                                                                                                                                                                                                                                                                             |
|--------------------------------|---------------------------------------------------------------------------------------------------------------------------------------------------------------------------------------------------------------------------------------------------------------------------------------------------------------------------------------------------------------------------------------------------------------------------------------------------------------------------------------------------------------------------------------------------------------------------------------------------------------------------------------|
| Kulig et al., 2020             | Kulig B, Erdelyi-Hamza B, Elek LP, Kovacs I, Smirnova D, Fountoulakis K, Gonda X. A COVID-19 pandémia hatása a pszichológiai jólétre, az életmódra és a járvány eredetével kapcsolatos attitűdökre pszichiátriai betegséggel élő és egészséges személyekben: egy nagy nemzetközi vizsgálat első magyarországi adatai [Effects of COVID-19 on psychological well-being, lifestyle and attitudes towards the origins of the pandemic in psychiatric patients and mentally healthy subjects: first Hungarian descriptive results from a large international online study]. Neuropsychopharmacol Hung. 2020 Dec;22(4):154-165. Hungarian. |
| Perez-Rodrigo et al., 2020     | Perez-Rodrigo C., Citores, M. G., Barbara, G. H., Litago, F. R., Saenz, L. C., Aranceta-Bartrina, J., Val, V. A., Lopez-Sobaler, A. M., Victoria, E. M. D., Ortega, R. M., Partearroyo, T., Izquierdo, J. Q., Barba, L. R., Martin, A. R., Castell, G. S., Tur, J. A., Ibanez, M. V., Varela-Moreiras, G., Serra-Majem, L. Changes in eating habits during lockdown period due to the COVID-19 pandemic in Spain. [Spanish]. Revista Espanola de Nutricion Comunitaria 2020;26(2):101-11.                                                                                                                                             |
| Rebollar Álvarez et al., 2021  | Rebollar Álvarez A, Nuez Vicente C, Lozano Polo A, Pérez Ríos M, Pola Ferrández E, Furió Martínez AM, Monteagudo Piqueras O, Dalmau González-Gallarza R, Doncel Barrera J, Justo Gil S, Rey Brandariz J, González Carreño C, Gómez-Chacón Galán C. Consumo de tabaco en España durante el estado de alarma por COVID-19: resultados de una evaluación a través de redes sociales [Tobacco use in Spain during COVID-19 lockdown: an evaluation through social media.]. Rev Esp Salud Publica. 2021 Mar 16;95:e202103049.                                                                                                              |
| Sánchez Conejero et al., 2021  | Sánchez Conejero M, González de Buitrago Amigo J, Tejado Bravo ML, de Nicolás Jiménez JM. Repercusión del confinamiento por COVID-19 sobre el control glucémico en niños y adolescentes con diabetes mellitus tipo 1 [Impact of COVID-19 lockdown on glucemic control in children and adolescents with type 1 diabetes mellitus]. An Pediatr (Barc). 2021 Jan 23:S1695-4033(21)00003-5. Spanish. doi: 10.1016/j.anpedi.2020.12.021.                                                                                                                                                                                                   |
| Sinisterra Loaiza et al., 2020 | Sinisterra Loaiza LI, Vázquez Belda B, Miranda López JM, Cepeda A, Cardelle Cobas A. Hábitos alimentarios en la población gallega durante el confinamiento por la COVID-19 [Food habits in the Galician population during confinement by COVID-19]. Nutr Hosp. 2020 Dec 16;37(6):1190-1196. Spanish. doi: 10.20960/nh.03213.                                                                                                                                                                                                                                                                                                          |
| Tárraga López et al., 2021     | Tárraga López PJ, Panisello Royo JM, Carbayo Herencia JA, Carro A, Rosich N, Panisello M, Allins Presas J, Solera Albero J. Cambios observados en la adherencia a la dieta mediterránea en una población española durante el confinamiento debido a la pandemia ocasionada por el SARS-CoV-2 [Changes in adherence to the Mediterranean diet observed in a Spanish population during confinement for the SARS-CoV-2 pandemic]. Nutr Hosp. 2021 Feb 23;38(1):109-120. Spanish. doi: 10.20960/nh.03275.                                                                                                                                 |
| Villanueva et al., 2021        | Villanueva VJ, Motos P, Isorna M, Villanueva V, Blay P, Vázquez-Martínez A. Impacto de las medidas de confinamiento durante la pandemia de Covid-19 en el consumo de riesgo de alcohol [Impact of confinement measures on the Covid-19 pandemic on alcohol risk consumption.]. Rev Esp Salud Publica. 2021 Jan 20;95:e202101015.                                                                                                                                                                                                                                                                                                      |
| Wiwanikit et al., 2020         | Wiwanikit V, Rodríguez-Núñez I. COVID-19, cuarentena, intensidad del ejercicio y niños [COVID-19, quarantine, exercise intensity and children]. Rev Chil Pediatr. 2020 Dec;91(6):1000. Spanish. doi: 10.32641/rchped.vi91i6.2991.                                                                                                                                                                                                                                                                                                                                                                                                     |

### S2.1.8 EXCLUDED FULLTEXTS – REASON: POPULATION

| Study                   | Reference                                                                                                                                                                                                                                                                                                                                                |
|-------------------------|----------------------------------------------------------------------------------------------------------------------------------------------------------------------------------------------------------------------------------------------------------------------------------------------------------------------------------------------------------|
| Cavarretta et al., 2021 | Cavarretta E, D'Angeli I, Giammarinaro M, Gervasi S, Fanchini M, Causarano A, Costa V, Manara M, Terribili N, Sciarra L, Calò L, Fossati C, Peruzzi M, Versaci F, Carnevale R, Biondi-Zoccai G, Frati G. Cardiovascular effects of COVID-19 lockdown in professional Football players. Panminerva Med. 2021 Feb 10. doi: 10.23736/S0031-0808.21.04340-8. |

### S2.1.9 EXCLUDED FULLTEXTS – REASON: DOUBLE PUBLICATION

| Study                      | Reference                                                                                                                                                                                                                                                                                                                 |
|----------------------------|---------------------------------------------------------------------------------------------------------------------------------------------------------------------------------------------------------------------------------------------------------------------------------------------------------------------------|
| Bourion-Bédès et al., 2021 | Bourion-Bédès S, Tarquinio C, Batt M, Tarquinio P, Lebreuilly R, Sorsana C, Legrand K, Rousseau H, Baumann C. Stress and associated factors among French university students under the COVID-19 lockdown: The results of the PIMS-CoV 19 study. J Affect Disord. 2021 Mar 15;283:108-114. doi: 10.1016/j.jad.2021.01.041. |

## S2.2 RESULTS OF DATA EXTRACTION

| Reference<br>(First author, publication year) | General<br>(Study design<br>Study name<br>Country of study<br>Time of study<br>No. of waves<br>Follow-up duration<br>(e.g., mean, range))                                                                                              | Population<br>(Description<br>Inclusion criteria<br># invited<br># baseline<br># follow-up<br>Age at baseline<br>% females<br>Response<br>Lost to follow-up)                                                                                                                                                                            | Exposure<br>(Description & assessment)                                                                                                                                                                                                                                                                                                                                                                                         | Outcome<br>(Description & assessment)                                                                                                                                                                                                                                                                                                                                                                            | Results<br>(Description of all topically relevant results)                                                                                                                                                                                                                                                                                                                                                                                                                                                                                                                                                                                                                                                                                                                                                                                                                                                                                                                                                                                                                                                                                                                                                                                                                                                                                                                                                                                                                                                                                                                                                                                                                                                                                                   | Comments<br>(study quality [overall assessment according to Iljaz/Shamliyan/SIGN/CASP]<br>Conflict of interest [stated vs. not stated]<br>Funding (public, non-profit, commercial)<br>Strengths (+) and weaknesses (-)) |              |              |                     |  |  |  |    |    |               |  |  |       |    |    |     |    |    |            |  |  |             |    |    |             |    |    |             |    |    |             |    |    |             |    |    |            |   |    |  |                                  |                                |                            |  |  |  |               |               |                   |  |  |  |               |               |                          |  |  |  |               |               |  |                                  |                                |                             |  |  |  |               |               |                                                                                                                                                                                                                                                                                                                                                                                                                                                                                                                                                                                                                                                                                                                                 |
|-----------------------------------------------|----------------------------------------------------------------------------------------------------------------------------------------------------------------------------------------------------------------------------------------|-----------------------------------------------------------------------------------------------------------------------------------------------------------------------------------------------------------------------------------------------------------------------------------------------------------------------------------------|--------------------------------------------------------------------------------------------------------------------------------------------------------------------------------------------------------------------------------------------------------------------------------------------------------------------------------------------------------------------------------------------------------------------------------|------------------------------------------------------------------------------------------------------------------------------------------------------------------------------------------------------------------------------------------------------------------------------------------------------------------------------------------------------------------------------------------------------------------|--------------------------------------------------------------------------------------------------------------------------------------------------------------------------------------------------------------------------------------------------------------------------------------------------------------------------------------------------------------------------------------------------------------------------------------------------------------------------------------------------------------------------------------------------------------------------------------------------------------------------------------------------------------------------------------------------------------------------------------------------------------------------------------------------------------------------------------------------------------------------------------------------------------------------------------------------------------------------------------------------------------------------------------------------------------------------------------------------------------------------------------------------------------------------------------------------------------------------------------------------------------------------------------------------------------------------------------------------------------------------------------------------------------------------------------------------------------------------------------------------------------------------------------------------------------------------------------------------------------------------------------------------------------------------------------------------------------------------------------------------------------|-------------------------------------------------------------------------------------------------------------------------------------------------------------------------------------------------------------------------|--------------|--------------|---------------------|--|--|--|----|----|---------------|--|--|-------|----|----|-----|----|----|------------|--|--|-------------|----|----|-------------|----|----|-------------|----|----|-------------|----|----|-------------|----|----|------------|---|----|--|----------------------------------|--------------------------------|----------------------------|--|--|--|---------------|---------------|-------------------|--|--|--|---------------|---------------|--------------------------|--|--|--|---------------|---------------|--|----------------------------------|--------------------------------|-----------------------------|--|--|--|---------------|---------------|---------------------------------------------------------------------------------------------------------------------------------------------------------------------------------------------------------------------------------------------------------------------------------------------------------------------------------------------------------------------------------------------------------------------------------------------------------------------------------------------------------------------------------------------------------------------------------------------------------------------------------------------------------------------------------------------------------------------------------|
| ADULTS FROM THE GENERAL POPULATION            |                                                                                                                                                                                                                                        |                                                                                                                                                                                                                                                                                                                                         |                                                                                                                                                                                                                                                                                                                                                                                                                                |                                                                                                                                                                                                                                                                                                                                                                                                                  |                                                                                                                                                                                                                                                                                                                                                                                                                                                                                                                                                                                                                                                                                                                                                                                                                                                                                                                                                                                                                                                                                                                                                                                                                                                                                                                                                                                                                                                                                                                                                                                                                                                                                                                                                              |                                                                                                                                                                                                                         |              |              |                     |  |  |  |    |    |               |  |  |       |    |    |     |    |    |            |  |  |             |    |    |             |    |    |             |    |    |             |    |    |             |    |    |            |   |    |  |                                  |                                |                            |  |  |  |               |               |                   |  |  |  |               |               |                          |  |  |  |               |               |  |                                  |                                |                             |  |  |  |               |               |                                                                                                                                                                                                                                                                                                                                                                                                                                                                                                                                                                                                                                                                                                                                 |
| Alpers et al., 2021                           | <b>Study design:</b><br>Cross-sectional study<br><b>Study name:</b><br>n.a.<br><b>Country of study:</b><br>Norway<br><b>Time of study:</b><br>April 15–30, 2020<br><b>No. of waves:</b><br>n = 1<br><b>Follow-up duration:</b><br>n.a. | <b>Description:</b><br>Adults<br><b>Inclusion criteria:</b><br>n.r.<br><b># invited:</b><br>n = 81,170<br><b># baseline:</b><br>n = 25,708<br><b># follow-up:</b><br>n.a.<br><b>Age at baseline:</b><br>Median: 50 years (IQR: 36–63)<br><b>% females:</b><br>56.2 %<br><b>Response:</b><br>31.7 %<br><b>Lost to follow-up:</b><br>n.a. | <b>COVID-19 pandemic measures</b> (implemented on March 12, 2020, social distancing, closure of educational, cultural, and training/sport/gym facilities, requirements to work from home, introduction of quarantine requirements):<br>- “placed in quarantine” (dichotomous variable: true/false)<br>- “temporarily laid-off” (dichotomous variable: true/false)<br>- “home office/study”, (dichotomous variable: true/false) | <b>Alcohol consumption:</b><br>- Alcohol Use Disorders Identification Test Consumption (AUDIT-C) (score for hazardous drinking for women: ≥ 3, for men: ≥ 4)<br>- consumed mean units per week via units per drinking day and drinking days per month (frequent binge drinking: drinking > 6 units on one occasion at least once a month)<br>- (Change in) alcohol consumption (1 self-reported single question) | <b>Tables 2 and S1: Descriptive statistics for the change in alcohol consumption since COVID-19 pandemic measures</b> <table><tr><th></th><th>Increase (%)</th><th>Decrease (%)</th></tr><tr><td><b>Total sample</b></td><td></td><td></td></tr><tr><td></td><td>13</td><td>23</td></tr><tr><td><b>Gender</b></td><td></td><td></td></tr><tr><td>Women</td><td>14</td><td>23</td></tr><tr><td>Men</td><td>13</td><td>22</td></tr><tr><td><b>Age</b></td><td></td><td></td></tr><tr><td>18–29 years</td><td>16</td><td>48</td></tr><tr><td>30–39 years</td><td>20</td><td>25</td></tr><tr><td>40–49 years</td><td>16</td><td>21</td></tr><tr><td>50–59 years</td><td>12</td><td>19</td></tr><tr><td>60–69 years</td><td>10</td><td>15</td></tr><tr><td>≥ 70 years</td><td>6</td><td>15</td></tr></table><br><b>Table 3: Risk factors for increase in alcohol consumption during COVID-19 pandemic phase</b> <table><tr><th></th><th>Unadjusted model<br/>OR (95 % CI)</th><th>Adjusted model<br/>OR (95 % CI)</th></tr><tr><td><b>Temporarily lay-off</b></td><td></td><td></td></tr><tr><td></td><td>1.7 (1.5–2.0)</td><td>1.2 (1.0–1.4)</td></tr><tr><td><b>Quarantine</b></td><td></td><td></td></tr><tr><td></td><td>1.2 (1.1–1.4)</td><td>1.2 (1.1–1.4)</td></tr><tr><td><b>Home office/study</b></td><td></td><td></td></tr><tr><td></td><td>1.7 (1.5–1.9)</td><td>1.4 (1.3–1.6)</td></tr></table><br><b>Table S4: Risk factors for decrease in alcohol consumption during COVID-19 pandemic phase</b> <table><tr><th></th><th>Unadjusted model<br/>OR (95 % CI)</th><th>Adjusted model<br/>OR (95 % CI)</th></tr><tr><td><b>Temporarily laid-off</b></td><td></td><td></td></tr><tr><td></td><td>1.7 (1.6–1.9)</td><td>1.3 (1.1–1.4)</td></tr></table> |                                                                                                                                                                                                                         | Increase (%) | Decrease (%) | <b>Total sample</b> |  |  |  | 13 | 23 | <b>Gender</b> |  |  | Women | 14 | 23 | Men | 13 | 22 | <b>Age</b> |  |  | 18–29 years | 16 | 48 | 30–39 years | 20 | 25 | 40–49 years | 16 | 21 | 50–59 years | 12 | 19 | 60–69 years | 10 | 15 | ≥ 70 years | 6 | 15 |  | Unadjusted model<br>OR (95 % CI) | Adjusted model<br>OR (95 % CI) | <b>Temporarily lay-off</b> |  |  |  | 1.7 (1.5–2.0) | 1.2 (1.0–1.4) | <b>Quarantine</b> |  |  |  | 1.2 (1.1–1.4) | 1.2 (1.1–1.4) | <b>Home office/study</b> |  |  |  | 1.7 (1.5–1.9) | 1.4 (1.3–1.6) |  | Unadjusted model<br>OR (95 % CI) | Adjusted model<br>OR (95 % CI) | <b>Temporarily laid-off</b> |  |  |  | 1.7 (1.6–1.9) | 1.3 (1.1–1.4) | <b>Overall study quality:</b><br>High risk<br><b>Conflict of interest:</b><br>Stated (none declared)<br><b>Funding:</b><br>Public funds<br><br>+ ethical approval from the Regional Committee for Medical and Health Research Ethics, Health Region West<br>+ random sampling<br>+ validated outcome measurement for the association with the self-reported quarantine status<br>+ logistic regression analysis for the investigation of associations<br>+ consideration of confounders “sex” and “age” (by stratification and adjustment)<br><br>- low response and no non-responder analysis<br>- self-reported question for the change in alcohol consumption<br>- due to study design no actual chronological investigation |
|                                               | Increase (%)                                                                                                                                                                                                                           | Decrease (%)                                                                                                                                                                                                                                                                                                                            |                                                                                                                                                                                                                                                                                                                                                                                                                                |                                                                                                                                                                                                                                                                                                                                                                                                                  |                                                                                                                                                                                                                                                                                                                                                                                                                                                                                                                                                                                                                                                                                                                                                                                                                                                                                                                                                                                                                                                                                                                                                                                                                                                                                                                                                                                                                                                                                                                                                                                                                                                                                                                                                              |                                                                                                                                                                                                                         |              |              |                     |  |  |  |    |    |               |  |  |       |    |    |     |    |    |            |  |  |             |    |    |             |    |    |             |    |    |             |    |    |             |    |    |            |   |    |  |                                  |                                |                            |  |  |  |               |               |                   |  |  |  |               |               |                          |  |  |  |               |               |  |                                  |                                |                             |  |  |  |               |               |                                                                                                                                                                                                                                                                                                                                                                                                                                                                                                                                                                                                                                                                                                                                 |
| <b>Total sample</b>                           |                                                                                                                                                                                                                                        |                                                                                                                                                                                                                                                                                                                                         |                                                                                                                                                                                                                                                                                                                                                                                                                                |                                                                                                                                                                                                                                                                                                                                                                                                                  |                                                                                                                                                                                                                                                                                                                                                                                                                                                                                                                                                                                                                                                                                                                                                                                                                                                                                                                                                                                                                                                                                                                                                                                                                                                                                                                                                                                                                                                                                                                                                                                                                                                                                                                                                              |                                                                                                                                                                                                                         |              |              |                     |  |  |  |    |    |               |  |  |       |    |    |     |    |    |            |  |  |             |    |    |             |    |    |             |    |    |             |    |    |             |    |    |            |   |    |  |                                  |                                |                            |  |  |  |               |               |                   |  |  |  |               |               |                          |  |  |  |               |               |  |                                  |                                |                             |  |  |  |               |               |                                                                                                                                                                                                                                                                                                                                                                                                                                                                                                                                                                                                                                                                                                                                 |
|                                               | 13                                                                                                                                                                                                                                     | 23                                                                                                                                                                                                                                                                                                                                      |                                                                                                                                                                                                                                                                                                                                                                                                                                |                                                                                                                                                                                                                                                                                                                                                                                                                  |                                                                                                                                                                                                                                                                                                                                                                                                                                                                                                                                                                                                                                                                                                                                                                                                                                                                                                                                                                                                                                                                                                                                                                                                                                                                                                                                                                                                                                                                                                                                                                                                                                                                                                                                                              |                                                                                                                                                                                                                         |              |              |                     |  |  |  |    |    |               |  |  |       |    |    |     |    |    |            |  |  |             |    |    |             |    |    |             |    |    |             |    |    |             |    |    |            |   |    |  |                                  |                                |                            |  |  |  |               |               |                   |  |  |  |               |               |                          |  |  |  |               |               |  |                                  |                                |                             |  |  |  |               |               |                                                                                                                                                                                                                                                                                                                                                                                                                                                                                                                                                                                                                                                                                                                                 |
| <b>Gender</b>                                 |                                                                                                                                                                                                                                        |                                                                                                                                                                                                                                                                                                                                         |                                                                                                                                                                                                                                                                                                                                                                                                                                |                                                                                                                                                                                                                                                                                                                                                                                                                  |                                                                                                                                                                                                                                                                                                                                                                                                                                                                                                                                                                                                                                                                                                                                                                                                                                                                                                                                                                                                                                                                                                                                                                                                                                                                                                                                                                                                                                                                                                                                                                                                                                                                                                                                                              |                                                                                                                                                                                                                         |              |              |                     |  |  |  |    |    |               |  |  |       |    |    |     |    |    |            |  |  |             |    |    |             |    |    |             |    |    |             |    |    |             |    |    |            |   |    |  |                                  |                                |                            |  |  |  |               |               |                   |  |  |  |               |               |                          |  |  |  |               |               |  |                                  |                                |                             |  |  |  |               |               |                                                                                                                                                                                                                                                                                                                                                                                                                                                                                                                                                                                                                                                                                                                                 |
| Women                                         | 14                                                                                                                                                                                                                                     | 23                                                                                                                                                                                                                                                                                                                                      |                                                                                                                                                                                                                                                                                                                                                                                                                                |                                                                                                                                                                                                                                                                                                                                                                                                                  |                                                                                                                                                                                                                                                                                                                                                                                                                                                                                                                                                                                                                                                                                                                                                                                                                                                                                                                                                                                                                                                                                                                                                                                                                                                                                                                                                                                                                                                                                                                                                                                                                                                                                                                                                              |                                                                                                                                                                                                                         |              |              |                     |  |  |  |    |    |               |  |  |       |    |    |     |    |    |            |  |  |             |    |    |             |    |    |             |    |    |             |    |    |             |    |    |            |   |    |  |                                  |                                |                            |  |  |  |               |               |                   |  |  |  |               |               |                          |  |  |  |               |               |  |                                  |                                |                             |  |  |  |               |               |                                                                                                                                                                                                                                                                                                                                                                                                                                                                                                                                                                                                                                                                                                                                 |
| Men                                           | 13                                                                                                                                                                                                                                     | 22                                                                                                                                                                                                                                                                                                                                      |                                                                                                                                                                                                                                                                                                                                                                                                                                |                                                                                                                                                                                                                                                                                                                                                                                                                  |                                                                                                                                                                                                                                                                                                                                                                                                                                                                                                                                                                                                                                                                                                                                                                                                                                                                                                                                                                                                                                                                                                                                                                                                                                                                                                                                                                                                                                                                                                                                                                                                                                                                                                                                                              |                                                                                                                                                                                                                         |              |              |                     |  |  |  |    |    |               |  |  |       |    |    |     |    |    |            |  |  |             |    |    |             |    |    |             |    |    |             |    |    |             |    |    |            |   |    |  |                                  |                                |                            |  |  |  |               |               |                   |  |  |  |               |               |                          |  |  |  |               |               |  |                                  |                                |                             |  |  |  |               |               |                                                                                                                                                                                                                                                                                                                                                                                                                                                                                                                                                                                                                                                                                                                                 |
| <b>Age</b>                                    |                                                                                                                                                                                                                                        |                                                                                                                                                                                                                                                                                                                                         |                                                                                                                                                                                                                                                                                                                                                                                                                                |                                                                                                                                                                                                                                                                                                                                                                                                                  |                                                                                                                                                                                                                                                                                                                                                                                                                                                                                                                                                                                                                                                                                                                                                                                                                                                                                                                                                                                                                                                                                                                                                                                                                                                                                                                                                                                                                                                                                                                                                                                                                                                                                                                                                              |                                                                                                                                                                                                                         |              |              |                     |  |  |  |    |    |               |  |  |       |    |    |     |    |    |            |  |  |             |    |    |             |    |    |             |    |    |             |    |    |             |    |    |            |   |    |  |                                  |                                |                            |  |  |  |               |               |                   |  |  |  |               |               |                          |  |  |  |               |               |  |                                  |                                |                             |  |  |  |               |               |                                                                                                                                                                                                                                                                                                                                                                                                                                                                                                                                                                                                                                                                                                                                 |
| 18–29 years                                   | 16                                                                                                                                                                                                                                     | 48                                                                                                                                                                                                                                                                                                                                      |                                                                                                                                                                                                                                                                                                                                                                                                                                |                                                                                                                                                                                                                                                                                                                                                                                                                  |                                                                                                                                                                                                                                                                                                                                                                                                                                                                                                                                                                                                                                                                                                                                                                                                                                                                                                                                                                                                                                                                                                                                                                                                                                                                                                                                                                                                                                                                                                                                                                                                                                                                                                                                                              |                                                                                                                                                                                                                         |              |              |                     |  |  |  |    |    |               |  |  |       |    |    |     |    |    |            |  |  |             |    |    |             |    |    |             |    |    |             |    |    |             |    |    |            |   |    |  |                                  |                                |                            |  |  |  |               |               |                   |  |  |  |               |               |                          |  |  |  |               |               |  |                                  |                                |                             |  |  |  |               |               |                                                                                                                                                                                                                                                                                                                                                                                                                                                                                                                                                                                                                                                                                                                                 |
| 30–39 years                                   | 20                                                                                                                                                                                                                                     | 25                                                                                                                                                                                                                                                                                                                                      |                                                                                                                                                                                                                                                                                                                                                                                                                                |                                                                                                                                                                                                                                                                                                                                                                                                                  |                                                                                                                                                                                                                                                                                                                                                                                                                                                                                                                                                                                                                                                                                                                                                                                                                                                                                                                                                                                                                                                                                                                                                                                                                                                                                                                                                                                                                                                                                                                                                                                                                                                                                                                                                              |                                                                                                                                                                                                                         |              |              |                     |  |  |  |    |    |               |  |  |       |    |    |     |    |    |            |  |  |             |    |    |             |    |    |             |    |    |             |    |    |             |    |    |            |   |    |  |                                  |                                |                            |  |  |  |               |               |                   |  |  |  |               |               |                          |  |  |  |               |               |  |                                  |                                |                             |  |  |  |               |               |                                                                                                                                                                                                                                                                                                                                                                                                                                                                                                                                                                                                                                                                                                                                 |
| 40–49 years                                   | 16                                                                                                                                                                                                                                     | 21                                                                                                                                                                                                                                                                                                                                      |                                                                                                                                                                                                                                                                                                                                                                                                                                |                                                                                                                                                                                                                                                                                                                                                                                                                  |                                                                                                                                                                                                                                                                                                                                                                                                                                                                                                                                                                                                                                                                                                                                                                                                                                                                                                                                                                                                                                                                                                                                                                                                                                                                                                                                                                                                                                                                                                                                                                                                                                                                                                                                                              |                                                                                                                                                                                                                         |              |              |                     |  |  |  |    |    |               |  |  |       |    |    |     |    |    |            |  |  |             |    |    |             |    |    |             |    |    |             |    |    |             |    |    |            |   |    |  |                                  |                                |                            |  |  |  |               |               |                   |  |  |  |               |               |                          |  |  |  |               |               |  |                                  |                                |                             |  |  |  |               |               |                                                                                                                                                                                                                                                                                                                                                                                                                                                                                                                                                                                                                                                                                                                                 |
| 50–59 years                                   | 12                                                                                                                                                                                                                                     | 19                                                                                                                                                                                                                                                                                                                                      |                                                                                                                                                                                                                                                                                                                                                                                                                                |                                                                                                                                                                                                                                                                                                                                                                                                                  |                                                                                                                                                                                                                                                                                                                                                                                                                                                                                                                                                                                                                                                                                                                                                                                                                                                                                                                                                                                                                                                                                                                                                                                                                                                                                                                                                                                                                                                                                                                                                                                                                                                                                                                                                              |                                                                                                                                                                                                                         |              |              |                     |  |  |  |    |    |               |  |  |       |    |    |     |    |    |            |  |  |             |    |    |             |    |    |             |    |    |             |    |    |             |    |    |            |   |    |  |                                  |                                |                            |  |  |  |               |               |                   |  |  |  |               |               |                          |  |  |  |               |               |  |                                  |                                |                             |  |  |  |               |               |                                                                                                                                                                                                                                                                                                                                                                                                                                                                                                                                                                                                                                                                                                                                 |
| 60–69 years                                   | 10                                                                                                                                                                                                                                     | 15                                                                                                                                                                                                                                                                                                                                      |                                                                                                                                                                                                                                                                                                                                                                                                                                |                                                                                                                                                                                                                                                                                                                                                                                                                  |                                                                                                                                                                                                                                                                                                                                                                                                                                                                                                                                                                                                                                                                                                                                                                                                                                                                                                                                                                                                                                                                                                                                                                                                                                                                                                                                                                                                                                                                                                                                                                                                                                                                                                                                                              |                                                                                                                                                                                                                         |              |              |                     |  |  |  |    |    |               |  |  |       |    |    |     |    |    |            |  |  |             |    |    |             |    |    |             |    |    |             |    |    |             |    |    |            |   |    |  |                                  |                                |                            |  |  |  |               |               |                   |  |  |  |               |               |                          |  |  |  |               |               |  |                                  |                                |                             |  |  |  |               |               |                                                                                                                                                                                                                                                                                                                                                                                                                                                                                                                                                                                                                                                                                                                                 |
| ≥ 70 years                                    | 6                                                                                                                                                                                                                                      | 15                                                                                                                                                                                                                                                                                                                                      |                                                                                                                                                                                                                                                                                                                                                                                                                                |                                                                                                                                                                                                                                                                                                                                                                                                                  |                                                                                                                                                                                                                                                                                                                                                                                                                                                                                                                                                                                                                                                                                                                                                                                                                                                                                                                                                                                                                                                                                                                                                                                                                                                                                                                                                                                                                                                                                                                                                                                                                                                                                                                                                              |                                                                                                                                                                                                                         |              |              |                     |  |  |  |    |    |               |  |  |       |    |    |     |    |    |            |  |  |             |    |    |             |    |    |             |    |    |             |    |    |             |    |    |            |   |    |  |                                  |                                |                            |  |  |  |               |               |                   |  |  |  |               |               |                          |  |  |  |               |               |  |                                  |                                |                             |  |  |  |               |               |                                                                                                                                                                                                                                                                                                                                                                                                                                                                                                                                                                                                                                                                                                                                 |
|                                               | Unadjusted model<br>OR (95 % CI)                                                                                                                                                                                                       | Adjusted model<br>OR (95 % CI)                                                                                                                                                                                                                                                                                                          |                                                                                                                                                                                                                                                                                                                                                                                                                                |                                                                                                                                                                                                                                                                                                                                                                                                                  |                                                                                                                                                                                                                                                                                                                                                                                                                                                                                                                                                                                                                                                                                                                                                                                                                                                                                                                                                                                                                                                                                                                                                                                                                                                                                                                                                                                                                                                                                                                                                                                                                                                                                                                                                              |                                                                                                                                                                                                                         |              |              |                     |  |  |  |    |    |               |  |  |       |    |    |     |    |    |            |  |  |             |    |    |             |    |    |             |    |    |             |    |    |             |    |    |            |   |    |  |                                  |                                |                            |  |  |  |               |               |                   |  |  |  |               |               |                          |  |  |  |               |               |  |                                  |                                |                             |  |  |  |               |               |                                                                                                                                                                                                                                                                                                                                                                                                                                                                                                                                                                                                                                                                                                                                 |
| <b>Temporarily lay-off</b>                    |                                                                                                                                                                                                                                        |                                                                                                                                                                                                                                                                                                                                         |                                                                                                                                                                                                                                                                                                                                                                                                                                |                                                                                                                                                                                                                                                                                                                                                                                                                  |                                                                                                                                                                                                                                                                                                                                                                                                                                                                                                                                                                                                                                                                                                                                                                                                                                                                                                                                                                                                                                                                                                                                                                                                                                                                                                                                                                                                                                                                                                                                                                                                                                                                                                                                                              |                                                                                                                                                                                                                         |              |              |                     |  |  |  |    |    |               |  |  |       |    |    |     |    |    |            |  |  |             |    |    |             |    |    |             |    |    |             |    |    |             |    |    |            |   |    |  |                                  |                                |                            |  |  |  |               |               |                   |  |  |  |               |               |                          |  |  |  |               |               |  |                                  |                                |                             |  |  |  |               |               |                                                                                                                                                                                                                                                                                                                                                                                                                                                                                                                                                                                                                                                                                                                                 |
|                                               | 1.7 (1.5–2.0)                                                                                                                                                                                                                          | 1.2 (1.0–1.4)                                                                                                                                                                                                                                                                                                                           |                                                                                                                                                                                                                                                                                                                                                                                                                                |                                                                                                                                                                                                                                                                                                                                                                                                                  |                                                                                                                                                                                                                                                                                                                                                                                                                                                                                                                                                                                                                                                                                                                                                                                                                                                                                                                                                                                                                                                                                                                                                                                                                                                                                                                                                                                                                                                                                                                                                                                                                                                                                                                                                              |                                                                                                                                                                                                                         |              |              |                     |  |  |  |    |    |               |  |  |       |    |    |     |    |    |            |  |  |             |    |    |             |    |    |             |    |    |             |    |    |             |    |    |            |   |    |  |                                  |                                |                            |  |  |  |               |               |                   |  |  |  |               |               |                          |  |  |  |               |               |  |                                  |                                |                             |  |  |  |               |               |                                                                                                                                                                                                                                                                                                                                                                                                                                                                                                                                                                                                                                                                                                                                 |
| <b>Quarantine</b>                             |                                                                                                                                                                                                                                        |                                                                                                                                                                                                                                                                                                                                         |                                                                                                                                                                                                                                                                                                                                                                                                                                |                                                                                                                                                                                                                                                                                                                                                                                                                  |                                                                                                                                                                                                                                                                                                                                                                                                                                                                                                                                                                                                                                                                                                                                                                                                                                                                                                                                                                                                                                                                                                                                                                                                                                                                                                                                                                                                                                                                                                                                                                                                                                                                                                                                                              |                                                                                                                                                                                                                         |              |              |                     |  |  |  |    |    |               |  |  |       |    |    |     |    |    |            |  |  |             |    |    |             |    |    |             |    |    |             |    |    |             |    |    |            |   |    |  |                                  |                                |                            |  |  |  |               |               |                   |  |  |  |               |               |                          |  |  |  |               |               |  |                                  |                                |                             |  |  |  |               |               |                                                                                                                                                                                                                                                                                                                                                                                                                                                                                                                                                                                                                                                                                                                                 |
|                                               | 1.2 (1.1–1.4)                                                                                                                                                                                                                          | 1.2 (1.1–1.4)                                                                                                                                                                                                                                                                                                                           |                                                                                                                                                                                                                                                                                                                                                                                                                                |                                                                                                                                                                                                                                                                                                                                                                                                                  |                                                                                                                                                                                                                                                                                                                                                                                                                                                                                                                                                                                                                                                                                                                                                                                                                                                                                                                                                                                                                                                                                                                                                                                                                                                                                                                                                                                                                                                                                                                                                                                                                                                                                                                                                              |                                                                                                                                                                                                                         |              |              |                     |  |  |  |    |    |               |  |  |       |    |    |     |    |    |            |  |  |             |    |    |             |    |    |             |    |    |             |    |    |             |    |    |            |   |    |  |                                  |                                |                            |  |  |  |               |               |                   |  |  |  |               |               |                          |  |  |  |               |               |  |                                  |                                |                             |  |  |  |               |               |                                                                                                                                                                                                                                                                                                                                                                                                                                                                                                                                                                                                                                                                                                                                 |
| <b>Home office/study</b>                      |                                                                                                                                                                                                                                        |                                                                                                                                                                                                                                                                                                                                         |                                                                                                                                                                                                                                                                                                                                                                                                                                |                                                                                                                                                                                                                                                                                                                                                                                                                  |                                                                                                                                                                                                                                                                                                                                                                                                                                                                                                                                                                                                                                                                                                                                                                                                                                                                                                                                                                                                                                                                                                                                                                                                                                                                                                                                                                                                                                                                                                                                                                                                                                                                                                                                                              |                                                                                                                                                                                                                         |              |              |                     |  |  |  |    |    |               |  |  |       |    |    |     |    |    |            |  |  |             |    |    |             |    |    |             |    |    |             |    |    |             |    |    |            |   |    |  |                                  |                                |                            |  |  |  |               |               |                   |  |  |  |               |               |                          |  |  |  |               |               |  |                                  |                                |                             |  |  |  |               |               |                                                                                                                                                                                                                                                                                                                                                                                                                                                                                                                                                                                                                                                                                                                                 |
|                                               | 1.7 (1.5–1.9)                                                                                                                                                                                                                          | 1.4 (1.3–1.6)                                                                                                                                                                                                                                                                                                                           |                                                                                                                                                                                                                                                                                                                                                                                                                                |                                                                                                                                                                                                                                                                                                                                                                                                                  |                                                                                                                                                                                                                                                                                                                                                                                                                                                                                                                                                                                                                                                                                                                                                                                                                                                                                                                                                                                                                                                                                                                                                                                                                                                                                                                                                                                                                                                                                                                                                                                                                                                                                                                                                              |                                                                                                                                                                                                                         |              |              |                     |  |  |  |    |    |               |  |  |       |    |    |     |    |    |            |  |  |             |    |    |             |    |    |             |    |    |             |    |    |             |    |    |            |   |    |  |                                  |                                |                            |  |  |  |               |               |                   |  |  |  |               |               |                          |  |  |  |               |               |  |                                  |                                |                             |  |  |  |               |               |                                                                                                                                                                                                                                                                                                                                                                                                                                                                                                                                                                                                                                                                                                                                 |
|                                               | Unadjusted model<br>OR (95 % CI)                                                                                                                                                                                                       | Adjusted model<br>OR (95 % CI)                                                                                                                                                                                                                                                                                                          |                                                                                                                                                                                                                                                                                                                                                                                                                                |                                                                                                                                                                                                                                                                                                                                                                                                                  |                                                                                                                                                                                                                                                                                                                                                                                                                                                                                                                                                                                                                                                                                                                                                                                                                                                                                                                                                                                                                                                                                                                                                                                                                                                                                                                                                                                                                                                                                                                                                                                                                                                                                                                                                              |                                                                                                                                                                                                                         |              |              |                     |  |  |  |    |    |               |  |  |       |    |    |     |    |    |            |  |  |             |    |    |             |    |    |             |    |    |             |    |    |             |    |    |            |   |    |  |                                  |                                |                            |  |  |  |               |               |                   |  |  |  |               |               |                          |  |  |  |               |               |  |                                  |                                |                             |  |  |  |               |               |                                                                                                                                                                                                                                                                                                                                                                                                                                                                                                                                                                                                                                                                                                                                 |
| <b>Temporarily laid-off</b>                   |                                                                                                                                                                                                                                        |                                                                                                                                                                                                                                                                                                                                         |                                                                                                                                                                                                                                                                                                                                                                                                                                |                                                                                                                                                                                                                                                                                                                                                                                                                  |                                                                                                                                                                                                                                                                                                                                                                                                                                                                                                                                                                                                                                                                                                                                                                                                                                                                                                                                                                                                                                                                                                                                                                                                                                                                                                                                                                                                                                                                                                                                                                                                                                                                                                                                                              |                                                                                                                                                                                                                         |              |              |                     |  |  |  |    |    |               |  |  |       |    |    |     |    |    |            |  |  |             |    |    |             |    |    |             |    |    |             |    |    |             |    |    |            |   |    |  |                                  |                                |                            |  |  |  |               |               |                   |  |  |  |               |               |                          |  |  |  |               |               |  |                                  |                                |                             |  |  |  |               |               |                                                                                                                                                                                                                                                                                                                                                                                                                                                                                                                                                                                                                                                                                                                                 |
|                                               | 1.7 (1.6–1.9)                                                                                                                                                                                                                          | 1.3 (1.1–1.4)                                                                                                                                                                                                                                                                                                                           |                                                                                                                                                                                                                                                                                                                                                                                                                                |                                                                                                                                                                                                                                                                                                                                                                                                                  |                                                                                                                                                                                                                                                                                                                                                                                                                                                                                                                                                                                                                                                                                                                                                                                                                                                                                                                                                                                                                                                                                                                                                                                                                                                                                                                                                                                                                                                                                                                                                                                                                                                                                                                                                              |                                                                                                                                                                                                                         |              |              |                     |  |  |  |    |    |               |  |  |       |    |    |     |    |    |            |  |  |             |    |    |             |    |    |             |    |    |             |    |    |             |    |    |            |   |    |  |                                  |                                |                            |  |  |  |               |               |                   |  |  |  |               |               |                          |  |  |  |               |               |  |                                  |                                |                             |  |  |  |               |               |                                                                                                                                                                                                                                                                                                                                                                                                                                                                                                                                                                                                                                                                                                                                 |

| Reference<br>(First author, publication year) | General<br>(Study design<br>Study name<br>Country of study<br>Time of study<br>No. of waves<br>Follow-up duration<br>(e.g., mean, range))                                                                                                                                           | Population<br>(Description<br>Inclusion criteria<br># invited<br># baseline<br># follow-up<br>Age at baseline<br>% females<br>Response<br>Lost to follow-up)                                                                                                                                                                                                                                                         | Exposure<br>(Description & assessment)                                                                                         | Outcome<br>(Description & assessment)                              | Results<br>(Description of all topically relevant results)                                                                                                                                                                                                                                                                                                                                                               | Comments<br>(study quality [overall assessment according to Iljaz/Shamliyan/SIGN/CASP]<br>Conflict of interest [stated vs. not stated]<br>Funding (public, non-profit, commercial)<br>Strengths (+) and weaknesses (-)) |                       |            |      |               |               |                   |      |          |      |                                                                                                                                                                                                                                                                                                                                                                                                                                                                                                                                                                                                                                                                                                                  |               |  |
|-----------------------------------------------|-------------------------------------------------------------------------------------------------------------------------------------------------------------------------------------------------------------------------------------------------------------------------------------|----------------------------------------------------------------------------------------------------------------------------------------------------------------------------------------------------------------------------------------------------------------------------------------------------------------------------------------------------------------------------------------------------------------------|--------------------------------------------------------------------------------------------------------------------------------|--------------------------------------------------------------------|--------------------------------------------------------------------------------------------------------------------------------------------------------------------------------------------------------------------------------------------------------------------------------------------------------------------------------------------------------------------------------------------------------------------------|-------------------------------------------------------------------------------------------------------------------------------------------------------------------------------------------------------------------------|-----------------------|------------|------|---------------|---------------|-------------------|------|----------|------|------------------------------------------------------------------------------------------------------------------------------------------------------------------------------------------------------------------------------------------------------------------------------------------------------------------------------------------------------------------------------------------------------------------------------------------------------------------------------------------------------------------------------------------------------------------------------------------------------------------------------------------------------------------------------------------------------------------|---------------|--|
|                                               |                                                                                                                                                                                                                                                                                     |                                                                                                                                                                                                                                                                                                                                                                                                                      |                                                                                                                                |                                                                    | <table><tr><td colspan="3">Quarantine</td></tr><tr><td></td><td>1.4 (1.2–1.5)</td><td>1.2 (1.1–1.4)</td></tr><tr><td colspan="3">Home office/study</td></tr><tr><td></td><td>1.9 (1.7–2.0)</td><td>1.4 (1.3–1.5)</td></tr></table> Multivariable binary logistic regression<br>Adjusted model adjusted for age, gender, economic worries, health worries, temporarily lay-off and/or quarantine and/or home office/study | Quarantine                                                                                                                                                                                                              |                       |            |      | 1.4 (1.2–1.5) | 1.2 (1.1–1.4) | Home office/study |      |          |      | 1.9 (1.7–2.0)                                                                                                                                                                                                                                                                                                                                                                                                                                                                                                                                                                                                                                                                                                    | 1.4 (1.3–1.5) |  |
| Quarantine                                    |                                                                                                                                                                                                                                                                                     |                                                                                                                                                                                                                                                                                                                                                                                                                      |                                                                                                                                |                                                                    |                                                                                                                                                                                                                                                                                                                                                                                                                          |                                                                                                                                                                                                                         |                       |            |      |               |               |                   |      |          |      |                                                                                                                                                                                                                                                                                                                                                                                                                                                                                                                                                                                                                                                                                                                  |               |  |
|                                               | 1.4 (1.2–1.5)                                                                                                                                                                                                                                                                       | 1.2 (1.1–1.4)                                                                                                                                                                                                                                                                                                                                                                                                        |                                                                                                                                |                                                                    |                                                                                                                                                                                                                                                                                                                                                                                                                          |                                                                                                                                                                                                                         |                       |            |      |               |               |                   |      |          |      |                                                                                                                                                                                                                                                                                                                                                                                                                                                                                                                                                                                                                                                                                                                  |               |  |
| Home office/study                             |                                                                                                                                                                                                                                                                                     |                                                                                                                                                                                                                                                                                                                                                                                                                      |                                                                                                                                |                                                                    |                                                                                                                                                                                                                                                                                                                                                                                                                          |                                                                                                                                                                                                                         |                       |            |      |               |               |                   |      |          |      |                                                                                                                                                                                                                                                                                                                                                                                                                                                                                                                                                                                                                                                                                                                  |               |  |
|                                               | 1.9 (1.7–2.0)                                                                                                                                                                                                                                                                       | 1.4 (1.3–1.5)                                                                                                                                                                                                                                                                                                                                                                                                        |                                                                                                                                |                                                                    |                                                                                                                                                                                                                                                                                                                                                                                                                          |                                                                                                                                                                                                                         |                       |            |      |               |               |                   |      |          |      |                                                                                                                                                                                                                                                                                                                                                                                                                                                                                                                                                                                                                                                                                                                  |               |  |
| Avery et al., 2020                            | <b>Study design:</b><br>Cross-sectional study<br><b>Study name:</b><br>Washington State Twin Registry<br><b>Country of study:</b><br>United States<br><b>Time of study:</b><br>March 26–April 5, 2020<br><b>No. of waves:</b><br><i>n</i> = 1<br><b>Follow-up duration:</b><br>n.a. | <b>Description:</b><br>Adult twins<br><b>Inclusion criteria:</b><br>Identical, same-sex fraternal twins<br><b># invited:</b><br><i>n</i> = 12,173<br><b># baseline:</b><br><i>n</i> = 3,971<br><b># follow-up:</b><br>n.a.<br><b>Age at baseline:</b><br>M: 50.4 years (SD: 16.0)<br><b>% females:</b><br>69.2 %<br><b>Response:</b><br>Individual: 32.8 %<br>Pair-wise: 21.1 %<br><b>Lost to follow-up:</b><br>n.a. | <b>COVID-19 mitigation strategies:</b> Washington implemented the state-wide “stay home, stay healthy” order on March 24, 2020 | <b>(Change in) alcohol use:</b><br>1 self-reported single question | <b>Table 1: Descriptive statistics for the change in alcohol use since lockdown</b> <table><tr><td></td><td><b>Prevalence (%)</b></td></tr><tr><td>Do not use</td><td>35.5</td></tr><tr><td>Use more</td><td>14.3</td></tr><tr><td>Use the same</td><td>39.4</td></tr><tr><td>Use less</td><td>10.9</td></tr></table>                                                                                                    |                                                                                                                                                                                                                         | <b>Prevalence (%)</b> | Do not use | 35.5 | Use more      | 14.3          | Use the same      | 39.4 | Use less | 10.9 | <b>Overall study quality:</b><br>High risk<br><b>Conflict of interest:</b><br>Stated (none declared)<br><b>Funding:</b><br>Public funds<br><br>+ethical approval from the Institutional Review Board at Washington State University + recruitment in the Washington State Twin Registry (identification of twins by the Washington State Department of Licensing (DOL), researchers receive a list of potential twins from the DOL on a weekly basis, the register sends potential participants an enrolment survey, and twins are enrolled when surveys have been received from both members)<br><br>- low response and no non-responder analysis<br>- outcome measurement with a single self-reported question |               |  |
|                                               | <b>Prevalence (%)</b>                                                                                                                                                                                                                                                               |                                                                                                                                                                                                                                                                                                                                                                                                                      |                                                                                                                                |                                                                    |                                                                                                                                                                                                                                                                                                                                                                                                                          |                                                                                                                                                                                                                         |                       |            |      |               |               |                   |      |          |      |                                                                                                                                                                                                                                                                                                                                                                                                                                                                                                                                                                                                                                                                                                                  |               |  |
| Do not use                                    | 35.5                                                                                                                                                                                                                                                                                |                                                                                                                                                                                                                                                                                                                                                                                                                      |                                                                                                                                |                                                                    |                                                                                                                                                                                                                                                                                                                                                                                                                          |                                                                                                                                                                                                                         |                       |            |      |               |               |                   |      |          |      |                                                                                                                                                                                                                                                                                                                                                                                                                                                                                                                                                                                                                                                                                                                  |               |  |
| Use more                                      | 14.3                                                                                                                                                                                                                                                                                |                                                                                                                                                                                                                                                                                                                                                                                                                      |                                                                                                                                |                                                                    |                                                                                                                                                                                                                                                                                                                                                                                                                          |                                                                                                                                                                                                                         |                       |            |      |               |               |                   |      |          |      |                                                                                                                                                                                                                                                                                                                                                                                                                                                                                                                                                                                                                                                                                                                  |               |  |
| Use the same                                  | 39.4                                                                                                                                                                                                                                                                                |                                                                                                                                                                                                                                                                                                                                                                                                                      |                                                                                                                                |                                                                    |                                                                                                                                                                                                                                                                                                                                                                                                                          |                                                                                                                                                                                                                         |                       |            |      |               |               |                   |      |          |      |                                                                                                                                                                                                                                                                                                                                                                                                                                                                                                                                                                                                                                                                                                                  |               |  |
| Use less                                      | 10.9                                                                                                                                                                                                                                                                                |                                                                                                                                                                                                                                                                                                                                                                                                                      |                                                                                                                                |                                                                    |                                                                                                                                                                                                                                                                                                                                                                                                                          |                                                                                                                                                                                                                         |                       |            |      |               |               |                   |      |          |      |                                                                                                                                                                                                                                                                                                                                                                                                                                                                                                                                                                                                                                                                                                                  |               |  |

| Reference<br>(First author, publication year)                             | General<br>(Study design<br>Study name<br>Country of study<br>Time of study<br>No. of waves<br>Follow-up duration<br>(e.g., mean, range))                                                                                                             | Population<br>(Description<br>Inclusion criteria<br># invited<br># baseline<br># follow-up<br>Age at baseline<br>% females<br>Response<br>Lost to follow-up)                                                                                                                                                                                                                   | Exposure<br>(Description & assessment)                                                                                                                                                                                                                                                                                                                                                                                                                                                                                                                                                                                                                | Outcome<br>(Description & assessment)                                                                                                                                                                                                                                                                                                                                                                                                                                                                                                                                                                                                                                                                                                         | Results<br>(Description of all topically relevant results)                                                                                                                                                                                                                                                                                                                                                                                                                                                 | Comments<br>(study quality [overall assessment according to Iljaz/Shamliyan/SIGN/CASP]<br>Conflict of interest [stated vs. not stated]<br>Funding (public, non-profit, commercial)<br>Strengths (+) and weaknesses (-)) |                    |                        |            |                             |            |             |            |                   |          |                                                                           |          |                                                                                                                                                                                                                                                                                                                                                                                                                                                                                                                                                         |
|---------------------------------------------------------------------------|-------------------------------------------------------------------------------------------------------------------------------------------------------------------------------------------------------------------------------------------------------|--------------------------------------------------------------------------------------------------------------------------------------------------------------------------------------------------------------------------------------------------------------------------------------------------------------------------------------------------------------------------------|-------------------------------------------------------------------------------------------------------------------------------------------------------------------------------------------------------------------------------------------------------------------------------------------------------------------------------------------------------------------------------------------------------------------------------------------------------------------------------------------------------------------------------------------------------------------------------------------------------------------------------------------------------|-----------------------------------------------------------------------------------------------------------------------------------------------------------------------------------------------------------------------------------------------------------------------------------------------------------------------------------------------------------------------------------------------------------------------------------------------------------------------------------------------------------------------------------------------------------------------------------------------------------------------------------------------------------------------------------------------------------------------------------------------|------------------------------------------------------------------------------------------------------------------------------------------------------------------------------------------------------------------------------------------------------------------------------------------------------------------------------------------------------------------------------------------------------------------------------------------------------------------------------------------------------------|-------------------------------------------------------------------------------------------------------------------------------------------------------------------------------------------------------------------------|--------------------|------------------------|------------|-----------------------------|------------|-------------|------------|-------------------|----------|---------------------------------------------------------------------------|----------|---------------------------------------------------------------------------------------------------------------------------------------------------------------------------------------------------------------------------------------------------------------------------------------------------------------------------------------------------------------------------------------------------------------------------------------------------------------------------------------------------------------------------------------------------------|
|                                                                           |                                                                                                                                                                                                                                                       |                                                                                                                                                                                                                                                                                                                                                                                |                                                                                                                                                                                                                                                                                                                                                                                                                                                                                                                                                                                                                                                       |                                                                                                                                                                                                                                                                                                                                                                                                                                                                                                                                                                                                                                                                                                                                               |                                                                                                                                                                                                                                                                                                                                                                                                                                                                                                            | - no consideration of the confounders "age" and "sex" in statistical analysis<br>- descriptive analysis only<br>- due to study design no actual chronological investigation                                             |                    |                        |            |                             |            |             |            |                   |          |                                                                           |          |                                                                                                                                                                                                                                                                                                                                                                                                                                                                                                                                                         |
| Berard et al., 2021                                                       | <b>Study design:</b><br>Cross-sectional study<br><b>Study name:</b><br>PSYCOV-CV study<br><b>Country of study:</b><br>France<br><b>Time of study:</b><br>April 17–May 10, 2020<br><b>No. of waves:</b><br>n = 1<br><b>Follow-up duration:</b><br>n.a. | <b>Description:</b><br>Older adults from the general population (aged ≥ 50 years)<br><b>Inclusion criteria:</b><br>n.r.<br><b># invited:</b><br>n = 777<br><b># baseline:</b><br>n = 536<br><b># follow-up:</b><br>n.a.<br><b>Age at baseline:</b><br>M: 67 years (range: 50–89)<br><b>% females:</b><br>52 %<br><b>Response:</b><br>69 %<br><b>Lost to follow-up:</b><br>n.a. | <b>COVID-19 lockdown</b> (March 17–May 10, 2020):<br>- requirement to stay at home<br>- only reasons for going out: going to work (if teleworking was impossible); doing essential food shopping; travelling for health reasons, assisting vulnerable people, family emergencies, childcare; for individual physical activity, taking out a pet (within the limit of one hour per day and within a maximum radius of one kilometre around the home)<br>- prohibition of any gathering of people who did not live in the same home<br>- infringements to these rules were penalized initially by fines and further punishable by 6 months imprisonment | <b>(Change in) diet quality:</b><br>Short, qualitative food frequency questionnaire (increased consumption of sugary foods, alcohol, fat or carbohydrates, not compensated by increased fruit and vegetable, dairy (within a limit of 2.5 servings/day), or lean protein consumption)<br><b>(Change in) physical activity</b> (reduction of ≥ 15 minutes/week since the start of lockdown (as compared to the last 2–4 weeks before lockdown):<br>Self-reported question<br><b>(Change in) weight gain</b> (≥ 500 g):<br>Self-reported question<br><b>(Change in) smoking</b> (≥ 1 cigarette/day):<br>Self-reported question<br><b>(Change in) antihypertensive, lipid-lowering or hypoglycemic drug treatment:</b><br>Self-reported question | <b>Table 1 and text: Descriptive statistics for the change in lifestyle factors since lockdown</b> <table><tr><th></th><th>Prevalence (n (%))</th></tr><tr><td>Decreased diet quality</td><td>142 (26.5)</td></tr><tr><td>Decreased physical activity</td><td>194 (36.2)</td></tr><tr><td>Weight gain</td><td>137 (25.6)</td></tr><tr><td>Increased smoking</td><td>21 (4.0)</td></tr><tr><td>Increased antihypertensive, lipid-lowering or hypoglycemic drug treatment</td><td>2 (0.37)</td></tr></table> |                                                                                                                                                                                                                         | Prevalence (n (%)) | Decreased diet quality | 142 (26.5) | Decreased physical activity | 194 (36.2) | Weight gain | 137 (25.6) | Increased smoking | 21 (4.0) | Increased antihypertensive, lipid-lowering or hypoglycemic drug treatment | 2 (0.37) | <b>Overall study quality:</b><br>High risk<br><b>Conflict of interest:</b><br>Stated (none declared)<br><b>Funding:</b><br>Public funds<br><br>+ random sampling<br>+ high response<br>+ outcome measurement of diet quality with a validated instrument<br><br>- self-reported outcome measurement of physical activity, weight gain, and smoking with single questions<br>- descriptive analysis only<br>- no consideration of the confounders "age" and "sex" in statistical analysis<br>- due to study design no actual chronological investigation |
|                                                                           | Prevalence (n (%))                                                                                                                                                                                                                                    |                                                                                                                                                                                                                                                                                                                                                                                |                                                                                                                                                                                                                                                                                                                                                                                                                                                                                                                                                                                                                                                       |                                                                                                                                                                                                                                                                                                                                                                                                                                                                                                                                                                                                                                                                                                                                               |                                                                                                                                                                                                                                                                                                                                                                                                                                                                                                            |                                                                                                                                                                                                                         |                    |                        |            |                             |            |             |            |                   |          |                                                                           |          |                                                                                                                                                                                                                                                                                                                                                                                                                                                                                                                                                         |
| Decreased diet quality                                                    | 142 (26.5)                                                                                                                                                                                                                                            |                                                                                                                                                                                                                                                                                                                                                                                |                                                                                                                                                                                                                                                                                                                                                                                                                                                                                                                                                                                                                                                       |                                                                                                                                                                                                                                                                                                                                                                                                                                                                                                                                                                                                                                                                                                                                               |                                                                                                                                                                                                                                                                                                                                                                                                                                                                                                            |                                                                                                                                                                                                                         |                    |                        |            |                             |            |             |            |                   |          |                                                                           |          |                                                                                                                                                                                                                                                                                                                                                                                                                                                                                                                                                         |
| Decreased physical activity                                               | 194 (36.2)                                                                                                                                                                                                                                            |                                                                                                                                                                                                                                                                                                                                                                                |                                                                                                                                                                                                                                                                                                                                                                                                                                                                                                                                                                                                                                                       |                                                                                                                                                                                                                                                                                                                                                                                                                                                                                                                                                                                                                                                                                                                                               |                                                                                                                                                                                                                                                                                                                                                                                                                                                                                                            |                                                                                                                                                                                                                         |                    |                        |            |                             |            |             |            |                   |          |                                                                           |          |                                                                                                                                                                                                                                                                                                                                                                                                                                                                                                                                                         |
| Weight gain                                                               | 137 (25.6)                                                                                                                                                                                                                                            |                                                                                                                                                                                                                                                                                                                                                                                |                                                                                                                                                                                                                                                                                                                                                                                                                                                                                                                                                                                                                                                       |                                                                                                                                                                                                                                                                                                                                                                                                                                                                                                                                                                                                                                                                                                                                               |                                                                                                                                                                                                                                                                                                                                                                                                                                                                                                            |                                                                                                                                                                                                                         |                    |                        |            |                             |            |             |            |                   |          |                                                                           |          |                                                                                                                                                                                                                                                                                                                                                                                                                                                                                                                                                         |
| Increased smoking                                                         | 21 (4.0)                                                                                                                                                                                                                                              |                                                                                                                                                                                                                                                                                                                                                                                |                                                                                                                                                                                                                                                                                                                                                                                                                                                                                                                                                                                                                                                       |                                                                                                                                                                                                                                                                                                                                                                                                                                                                                                                                                                                                                                                                                                                                               |                                                                                                                                                                                                                                                                                                                                                                                                                                                                                                            |                                                                                                                                                                                                                         |                    |                        |            |                             |            |             |            |                   |          |                                                                           |          |                                                                                                                                                                                                                                                                                                                                                                                                                                                                                                                                                         |
| Increased antihypertensive, lipid-lowering or hypoglycemic drug treatment | 2 (0.37)                                                                                                                                                                                                                                              |                                                                                                                                                                                                                                                                                                                                                                                |                                                                                                                                                                                                                                                                                                                                                                                                                                                                                                                                                                                                                                                       |                                                                                                                                                                                                                                                                                                                                                                                                                                                                                                                                                                                                                                                                                                                                               |                                                                                                                                                                                                                                                                                                                                                                                                                                                                                                            |                                                                                                                                                                                                                         |                    |                        |            |                             |            |             |            |                   |          |                                                                           |          |                                                                                                                                                                                                                                                                                                                                                                                                                                                                                                                                                         |

| Reference<br>(First author, publication year)           | General<br>(Study design<br>Study name<br>Country of study<br>Time of study<br>No. of waves<br>Follow-up duration<br>(e.g., mean, range))                                                                                 | Population<br>(Description<br>Inclusion criteria<br># invited<br># baseline<br># follow-up<br>Age at baseline<br>% females<br>Response<br>Lost to follow-up)                                                                                                                                                                                                                                                                                                                                                                                                                        | Exposure<br>(Description & assessment)                   | Outcome<br>(Description & assessment)                                                                                                                                                                                                                                                | Results<br>(Description of all topically relevant results)                                                                                                                                                                                                                                                                                                                                                                                                                                                                                                                                                                                                                                                                                                                                                                                                                                                                                                                                                                                                                                                                                                                                                                                                                                                                                                                                                                                                                                                                                                                                                                                                                                                                                                                                                                                             | Comments<br>(study quality [overall assessment according to Iljaz/Shamliyan/SIGN/CASP]<br>Conflict of interest [stated vs. not stated]<br>Funding (public, non-profit, commercial)<br>Strengths (+) and weaknesses (-)) |                         |                            |   |               |            |            |         |                       |            |            |       |  |                     |   |                     |  |  |                               |   |         |                |   |         |                 |   |         |                  |   |         |                        |   |         |                 |   |         |                          |   |         |        |   |         |                      |   |       |       |   |      |                                                      |  |  |              |   |         |                            |   |         |         |   |         |      |   |       |                 |   |         |                    |   |       |     |   |       |                                                         |  |  |                                                                                                                                                                                                                                                                                                                                                                                                                                                                                                                                                                                                                                                                                                                                                                                                                                                |
|---------------------------------------------------------|---------------------------------------------------------------------------------------------------------------------------------------------------------------------------------------------------------------------------|-------------------------------------------------------------------------------------------------------------------------------------------------------------------------------------------------------------------------------------------------------------------------------------------------------------------------------------------------------------------------------------------------------------------------------------------------------------------------------------------------------------------------------------------------------------------------------------|----------------------------------------------------------|--------------------------------------------------------------------------------------------------------------------------------------------------------------------------------------------------------------------------------------------------------------------------------------|--------------------------------------------------------------------------------------------------------------------------------------------------------------------------------------------------------------------------------------------------------------------------------------------------------------------------------------------------------------------------------------------------------------------------------------------------------------------------------------------------------------------------------------------------------------------------------------------------------------------------------------------------------------------------------------------------------------------------------------------------------------------------------------------------------------------------------------------------------------------------------------------------------------------------------------------------------------------------------------------------------------------------------------------------------------------------------------------------------------------------------------------------------------------------------------------------------------------------------------------------------------------------------------------------------------------------------------------------------------------------------------------------------------------------------------------------------------------------------------------------------------------------------------------------------------------------------------------------------------------------------------------------------------------------------------------------------------------------------------------------------------------------------------------------------------------------------------------------------|-------------------------------------------------------------------------------------------------------------------------------------------------------------------------------------------------------------------------|-------------------------|----------------------------|---|---------------|------------|------------|---------|-----------------------|------------|------------|-------|--|---------------------|---|---------------------|--|--|-------------------------------|---|---------|----------------|---|---------|-----------------|---|---------|------------------|---|---------|------------------------|---|---------|-----------------|---|---------|--------------------------|---|---------|--------|---|---------|----------------------|---|-------|-------|---|------|------------------------------------------------------|--|--|--------------|---|---------|----------------------------|---|---------|---------|---|---------|------|---|-------|-----------------|---|---------|--------------------|---|-------|-----|---|-------|---------------------------------------------------------|--|--|------------------------------------------------------------------------------------------------------------------------------------------------------------------------------------------------------------------------------------------------------------------------------------------------------------------------------------------------------------------------------------------------------------------------------------------------------------------------------------------------------------------------------------------------------------------------------------------------------------------------------------------------------------------------------------------------------------------------------------------------------------------------------------------------------------------------------------------------|
| Cicero et al., 2021                                     | <b>Study design:</b> Cross-sectional study<br><b>Study name:</b> Brisighella Heart Study<br><b>Country of study:</b> Italy<br><b>Time of study:</b> n.r.<br><b>No. of waves:</b> n = 1<br><b>Follow-up duration:</b> n.a. | <b>Description:</b> Adults<br><b>Inclusion criteria:</b> Exclusion of workers not in quarantine (e.g., healthcare personnel, police forces, military personnel and farmers), if they were in quarantine from less than four weeks, or were affected by COVID-19 infection or other severe diseases diagnosed after the last population survey<br><b># invited:</b> n = 1,538<br><b># baseline:</b> n = 359<br><b># follow-up:</b> n.a.<br><b>Age at baseline:</b> M: 64.6 years (SD: 13.3)<br><b>% females:</b> 56.5 %<br><b>Response:</b> 23.3 %<br><b>Lost to follow-up:</b> n.a. | <b>COVID-19-related quarantine</b> (February–April 2020) | <b>Dietary quality:</b> Dietary Quality Index<br><b>Alcohol consumption:</b> 1 item from the Dietary Quality Index<br><b>Smoking:</b> Single question<br><b>Body mass index:</b> Single question<br><br>Retrospective assessment of levels pre-quarantine using the same instruments | <b>Text: Change in energy intake (kcal) and overall dietary quality index since lockdown</b> <table><tr><th></th><th>Pre-quarantine (M (SD))</th><th>During quarantine (M (SD))</th><th>p</th></tr><tr><td>Energy intake</td><td>2568 (322)</td><td>2739 (442)</td><td>&lt; 0.001</td></tr><tr><td>Dietary quality index</td><td>42.4 (4.1)</td><td>37.8 (4.7)</td><td>0.011</td></tr></table><br><b>Text: Change in daily consumption of different food categories since lockdown</b> <table><tr><th></th><th>Direction of change</th><th>p</th></tr><tr><td colspan="3"><b>Daily intake</b></td></tr><tr><td>Bread and bread-like products</td><td>↑</td><td>&lt; 0.001</td></tr><tr><td>Pasta and rice</td><td>↑</td><td>&lt; 0.001</td></tr><tr><td>Green vegetable</td><td>↑</td><td>&lt; 0.001</td></tr><tr><td>Other vegetables</td><td>↑</td><td>&lt; 0.001</td></tr><tr><td>Healthy vegetable oils</td><td>↑</td><td>&lt; 0.001</td></tr><tr><td>Milk and yogurt</td><td>↑</td><td>&lt; 0.001</td></tr><tr><td>Simple sugars and sweets</td><td>↑</td><td>&lt; 0.001</td></tr><tr><td>Coffee</td><td>↑</td><td>&lt; 0.001</td></tr><tr><td>Non-alcoholic drinks</td><td>=</td><td>0.778</td></tr><tr><td>Water</td><td>=</td><td>0.69</td></tr><tr><td colspan="3"><b>Frequent weekly intake (0–6 portion per week)</b></td></tr><tr><td>Low-fat meat</td><td>↑</td><td>&lt; 0.001</td></tr><tr><td>Cured meats other than ham</td><td>↑</td><td>&lt; 0.001</td></tr><tr><td>Cheeses</td><td>↑</td><td>&lt; 0.001</td></tr><tr><td>Eggs</td><td>↑</td><td>0.015</td></tr><tr><td>Mixed seed oils</td><td>↑</td><td>&lt; 0.001</td></tr><tr><td>Non-cured fat meat</td><td>=</td><td>0.954</td></tr><tr><td>Ham</td><td>=</td><td>0.835</td></tr><tr><td colspan="3"><b>Less frequent week intake (0–3 portion per week)</b></td></tr></table> |                                                                                                                                                                                                                         | Pre-quarantine (M (SD)) | During quarantine (M (SD)) | p | Energy intake | 2568 (322) | 2739 (442) | < 0.001 | Dietary quality index | 42.4 (4.1) | 37.8 (4.7) | 0.011 |  | Direction of change | p | <b>Daily intake</b> |  |  | Bread and bread-like products | ↑ | < 0.001 | Pasta and rice | ↑ | < 0.001 | Green vegetable | ↑ | < 0.001 | Other vegetables | ↑ | < 0.001 | Healthy vegetable oils | ↑ | < 0.001 | Milk and yogurt | ↑ | < 0.001 | Simple sugars and sweets | ↑ | < 0.001 | Coffee | ↑ | < 0.001 | Non-alcoholic drinks | = | 0.778 | Water | = | 0.69 | <b>Frequent weekly intake (0–6 portion per week)</b> |  |  | Low-fat meat | ↑ | < 0.001 | Cured meats other than ham | ↑ | < 0.001 | Cheeses | ↑ | < 0.001 | Eggs | ↑ | 0.015 | Mixed seed oils | ↑ | < 0.001 | Non-cured fat meat | = | 0.954 | Ham | = | 0.835 | <b>Less frequent week intake (0–3 portion per week)</b> |  |  | <b>Overall study quality:</b> High risk<br><b>Conflict of interest:</b> Stated (none declared)<br><b>Funding:</b> Bank foundation<br><br>+ ethical approval from the Institutional Ethical Board of the University Hospital of Bologna<br>+ random sampling of the participants of the original study<br>+ measurement of dietary quality with a validated instrument<br>+ using t-tests for paired samples or the Wilcoxon rank test to investigate differences<br>+ consideration of confounders “sex” and “age” (by stratification)<br><br>- low response<br>- measurement of smoking and body mass index with single questions<br>- retrospective assessment of energy intake, main diet components, alcohol consumption, and body mass index before lockdown (recall bias)<br>- due to study design no actual chronological investigation |
|                                                         | Pre-quarantine (M (SD))                                                                                                                                                                                                   | During quarantine (M (SD))                                                                                                                                                                                                                                                                                                                                                                                                                                                                                                                                                          | p                                                        |                                                                                                                                                                                                                                                                                      |                                                                                                                                                                                                                                                                                                                                                                                                                                                                                                                                                                                                                                                                                                                                                                                                                                                                                                                                                                                                                                                                                                                                                                                                                                                                                                                                                                                                                                                                                                                                                                                                                                                                                                                                                                                                                                                        |                                                                                                                                                                                                                         |                         |                            |   |               |            |            |         |                       |            |            |       |  |                     |   |                     |  |  |                               |   |         |                |   |         |                 |   |         |                  |   |         |                        |   |         |                 |   |         |                          |   |         |        |   |         |                      |   |       |       |   |      |                                                      |  |  |              |   |         |                            |   |         |         |   |         |      |   |       |                 |   |         |                    |   |       |     |   |       |                                                         |  |  |                                                                                                                                                                                                                                                                                                                                                                                                                                                                                                                                                                                                                                                                                                                                                                                                                                                |
| Energy intake                                           | 2568 (322)                                                                                                                                                                                                                | 2739 (442)                                                                                                                                                                                                                                                                                                                                                                                                                                                                                                                                                                          | < 0.001                                                  |                                                                                                                                                                                                                                                                                      |                                                                                                                                                                                                                                                                                                                                                                                                                                                                                                                                                                                                                                                                                                                                                                                                                                                                                                                                                                                                                                                                                                                                                                                                                                                                                                                                                                                                                                                                                                                                                                                                                                                                                                                                                                                                                                                        |                                                                                                                                                                                                                         |                         |                            |   |               |            |            |         |                       |            |            |       |  |                     |   |                     |  |  |                               |   |         |                |   |         |                 |   |         |                  |   |         |                        |   |         |                 |   |         |                          |   |         |        |   |         |                      |   |       |       |   |      |                                                      |  |  |              |   |         |                            |   |         |         |   |         |      |   |       |                 |   |         |                    |   |       |     |   |       |                                                         |  |  |                                                                                                                                                                                                                                                                                                                                                                                                                                                                                                                                                                                                                                                                                                                                                                                                                                                |
| Dietary quality index                                   | 42.4 (4.1)                                                                                                                                                                                                                | 37.8 (4.7)                                                                                                                                                                                                                                                                                                                                                                                                                                                                                                                                                                          | 0.011                                                    |                                                                                                                                                                                                                                                                                      |                                                                                                                                                                                                                                                                                                                                                                                                                                                                                                                                                                                                                                                                                                                                                                                                                                                                                                                                                                                                                                                                                                                                                                                                                                                                                                                                                                                                                                                                                                                                                                                                                                                                                                                                                                                                                                                        |                                                                                                                                                                                                                         |                         |                            |   |               |            |            |         |                       |            |            |       |  |                     |   |                     |  |  |                               |   |         |                |   |         |                 |   |         |                  |   |         |                        |   |         |                 |   |         |                          |   |         |        |   |         |                      |   |       |       |   |      |                                                      |  |  |              |   |         |                            |   |         |         |   |         |      |   |       |                 |   |         |                    |   |       |     |   |       |                                                         |  |  |                                                                                                                                                                                                                                                                                                                                                                                                                                                                                                                                                                                                                                                                                                                                                                                                                                                |
|                                                         | Direction of change                                                                                                                                                                                                       | p                                                                                                                                                                                                                                                                                                                                                                                                                                                                                                                                                                                   |                                                          |                                                                                                                                                                                                                                                                                      |                                                                                                                                                                                                                                                                                                                                                                                                                                                                                                                                                                                                                                                                                                                                                                                                                                                                                                                                                                                                                                                                                                                                                                                                                                                                                                                                                                                                                                                                                                                                                                                                                                                                                                                                                                                                                                                        |                                                                                                                                                                                                                         |                         |                            |   |               |            |            |         |                       |            |            |       |  |                     |   |                     |  |  |                               |   |         |                |   |         |                 |   |         |                  |   |         |                        |   |         |                 |   |         |                          |   |         |        |   |         |                      |   |       |       |   |      |                                                      |  |  |              |   |         |                            |   |         |         |   |         |      |   |       |                 |   |         |                    |   |       |     |   |       |                                                         |  |  |                                                                                                                                                                                                                                                                                                                                                                                                                                                                                                                                                                                                                                                                                                                                                                                                                                                |
| <b>Daily intake</b>                                     |                                                                                                                                                                                                                           |                                                                                                                                                                                                                                                                                                                                                                                                                                                                                                                                                                                     |                                                          |                                                                                                                                                                                                                                                                                      |                                                                                                                                                                                                                                                                                                                                                                                                                                                                                                                                                                                                                                                                                                                                                                                                                                                                                                                                                                                                                                                                                                                                                                                                                                                                                                                                                                                                                                                                                                                                                                                                                                                                                                                                                                                                                                                        |                                                                                                                                                                                                                         |                         |                            |   |               |            |            |         |                       |            |            |       |  |                     |   |                     |  |  |                               |   |         |                |   |         |                 |   |         |                  |   |         |                        |   |         |                 |   |         |                          |   |         |        |   |         |                      |   |       |       |   |      |                                                      |  |  |              |   |         |                            |   |         |         |   |         |      |   |       |                 |   |         |                    |   |       |     |   |       |                                                         |  |  |                                                                                                                                                                                                                                                                                                                                                                                                                                                                                                                                                                                                                                                                                                                                                                                                                                                |
| Bread and bread-like products                           | ↑                                                                                                                                                                                                                         | < 0.001                                                                                                                                                                                                                                                                                                                                                                                                                                                                                                                                                                             |                                                          |                                                                                                                                                                                                                                                                                      |                                                                                                                                                                                                                                                                                                                                                                                                                                                                                                                                                                                                                                                                                                                                                                                                                                                                                                                                                                                                                                                                                                                                                                                                                                                                                                                                                                                                                                                                                                                                                                                                                                                                                                                                                                                                                                                        |                                                                                                                                                                                                                         |                         |                            |   |               |            |            |         |                       |            |            |       |  |                     |   |                     |  |  |                               |   |         |                |   |         |                 |   |         |                  |   |         |                        |   |         |                 |   |         |                          |   |         |        |   |         |                      |   |       |       |   |      |                                                      |  |  |              |   |         |                            |   |         |         |   |         |      |   |       |                 |   |         |                    |   |       |     |   |       |                                                         |  |  |                                                                                                                                                                                                                                                                                                                                                                                                                                                                                                                                                                                                                                                                                                                                                                                                                                                |
| Pasta and rice                                          | ↑                                                                                                                                                                                                                         | < 0.001                                                                                                                                                                                                                                                                                                                                                                                                                                                                                                                                                                             |                                                          |                                                                                                                                                                                                                                                                                      |                                                                                                                                                                                                                                                                                                                                                                                                                                                                                                                                                                                                                                                                                                                                                                                                                                                                                                                                                                                                                                                                                                                                                                                                                                                                                                                                                                                                                                                                                                                                                                                                                                                                                                                                                                                                                                                        |                                                                                                                                                                                                                         |                         |                            |   |               |            |            |         |                       |            |            |       |  |                     |   |                     |  |  |                               |   |         |                |   |         |                 |   |         |                  |   |         |                        |   |         |                 |   |         |                          |   |         |        |   |         |                      |   |       |       |   |      |                                                      |  |  |              |   |         |                            |   |         |         |   |         |      |   |       |                 |   |         |                    |   |       |     |   |       |                                                         |  |  |                                                                                                                                                                                                                                                                                                                                                                                                                                                                                                                                                                                                                                                                                                                                                                                                                                                |
| Green vegetable                                         | ↑                                                                                                                                                                                                                         | < 0.001                                                                                                                                                                                                                                                                                                                                                                                                                                                                                                                                                                             |                                                          |                                                                                                                                                                                                                                                                                      |                                                                                                                                                                                                                                                                                                                                                                                                                                                                                                                                                                                                                                                                                                                                                                                                                                                                                                                                                                                                                                                                                                                                                                                                                                                                                                                                                                                                                                                                                                                                                                                                                                                                                                                                                                                                                                                        |                                                                                                                                                                                                                         |                         |                            |   |               |            |            |         |                       |            |            |       |  |                     |   |                     |  |  |                               |   |         |                |   |         |                 |   |         |                  |   |         |                        |   |         |                 |   |         |                          |   |         |        |   |         |                      |   |       |       |   |      |                                                      |  |  |              |   |         |                            |   |         |         |   |         |      |   |       |                 |   |         |                    |   |       |     |   |       |                                                         |  |  |                                                                                                                                                                                                                                                                                                                                                                                                                                                                                                                                                                                                                                                                                                                                                                                                                                                |
| Other vegetables                                        | ↑                                                                                                                                                                                                                         | < 0.001                                                                                                                                                                                                                                                                                                                                                                                                                                                                                                                                                                             |                                                          |                                                                                                                                                                                                                                                                                      |                                                                                                                                                                                                                                                                                                                                                                                                                                                                                                                                                                                                                                                                                                                                                                                                                                                                                                                                                                                                                                                                                                                                                                                                                                                                                                                                                                                                                                                                                                                                                                                                                                                                                                                                                                                                                                                        |                                                                                                                                                                                                                         |                         |                            |   |               |            |            |         |                       |            |            |       |  |                     |   |                     |  |  |                               |   |         |                |   |         |                 |   |         |                  |   |         |                        |   |         |                 |   |         |                          |   |         |        |   |         |                      |   |       |       |   |      |                                                      |  |  |              |   |         |                            |   |         |         |   |         |      |   |       |                 |   |         |                    |   |       |     |   |       |                                                         |  |  |                                                                                                                                                                                                                                                                                                                                                                                                                                                                                                                                                                                                                                                                                                                                                                                                                                                |
| Healthy vegetable oils                                  | ↑                                                                                                                                                                                                                         | < 0.001                                                                                                                                                                                                                                                                                                                                                                                                                                                                                                                                                                             |                                                          |                                                                                                                                                                                                                                                                                      |                                                                                                                                                                                                                                                                                                                                                                                                                                                                                                                                                                                                                                                                                                                                                                                                                                                                                                                                                                                                                                                                                                                                                                                                                                                                                                                                                                                                                                                                                                                                                                                                                                                                                                                                                                                                                                                        |                                                                                                                                                                                                                         |                         |                            |   |               |            |            |         |                       |            |            |       |  |                     |   |                     |  |  |                               |   |         |                |   |         |                 |   |         |                  |   |         |                        |   |         |                 |   |         |                          |   |         |        |   |         |                      |   |       |       |   |      |                                                      |  |  |              |   |         |                            |   |         |         |   |         |      |   |       |                 |   |         |                    |   |       |     |   |       |                                                         |  |  |                                                                                                                                                                                                                                                                                                                                                                                                                                                                                                                                                                                                                                                                                                                                                                                                                                                |
| Milk and yogurt                                         | ↑                                                                                                                                                                                                                         | < 0.001                                                                                                                                                                                                                                                                                                                                                                                                                                                                                                                                                                             |                                                          |                                                                                                                                                                                                                                                                                      |                                                                                                                                                                                                                                                                                                                                                                                                                                                                                                                                                                                                                                                                                                                                                                                                                                                                                                                                                                                                                                                                                                                                                                                                                                                                                                                                                                                                                                                                                                                                                                                                                                                                                                                                                                                                                                                        |                                                                                                                                                                                                                         |                         |                            |   |               |            |            |         |                       |            |            |       |  |                     |   |                     |  |  |                               |   |         |                |   |         |                 |   |         |                  |   |         |                        |   |         |                 |   |         |                          |   |         |        |   |         |                      |   |       |       |   |      |                                                      |  |  |              |   |         |                            |   |         |         |   |         |      |   |       |                 |   |         |                    |   |       |     |   |       |                                                         |  |  |                                                                                                                                                                                                                                                                                                                                                                                                                                                                                                                                                                                                                                                                                                                                                                                                                                                |
| Simple sugars and sweets                                | ↑                                                                                                                                                                                                                         | < 0.001                                                                                                                                                                                                                                                                                                                                                                                                                                                                                                                                                                             |                                                          |                                                                                                                                                                                                                                                                                      |                                                                                                                                                                                                                                                                                                                                                                                                                                                                                                                                                                                                                                                                                                                                                                                                                                                                                                                                                                                                                                                                                                                                                                                                                                                                                                                                                                                                                                                                                                                                                                                                                                                                                                                                                                                                                                                        |                                                                                                                                                                                                                         |                         |                            |   |               |            |            |         |                       |            |            |       |  |                     |   |                     |  |  |                               |   |         |                |   |         |                 |   |         |                  |   |         |                        |   |         |                 |   |         |                          |   |         |        |   |         |                      |   |       |       |   |      |                                                      |  |  |              |   |         |                            |   |         |         |   |         |      |   |       |                 |   |         |                    |   |       |     |   |       |                                                         |  |  |                                                                                                                                                                                                                                                                                                                                                                                                                                                                                                                                                                                                                                                                                                                                                                                                                                                |
| Coffee                                                  | ↑                                                                                                                                                                                                                         | < 0.001                                                                                                                                                                                                                                                                                                                                                                                                                                                                                                                                                                             |                                                          |                                                                                                                                                                                                                                                                                      |                                                                                                                                                                                                                                                                                                                                                                                                                                                                                                                                                                                                                                                                                                                                                                                                                                                                                                                                                                                                                                                                                                                                                                                                                                                                                                                                                                                                                                                                                                                                                                                                                                                                                                                                                                                                                                                        |                                                                                                                                                                                                                         |                         |                            |   |               |            |            |         |                       |            |            |       |  |                     |   |                     |  |  |                               |   |         |                |   |         |                 |   |         |                  |   |         |                        |   |         |                 |   |         |                          |   |         |        |   |         |                      |   |       |       |   |      |                                                      |  |  |              |   |         |                            |   |         |         |   |         |      |   |       |                 |   |         |                    |   |       |     |   |       |                                                         |  |  |                                                                                                                                                                                                                                                                                                                                                                                                                                                                                                                                                                                                                                                                                                                                                                                                                                                |
| Non-alcoholic drinks                                    | =                                                                                                                                                                                                                         | 0.778                                                                                                                                                                                                                                                                                                                                                                                                                                                                                                                                                                               |                                                          |                                                                                                                                                                                                                                                                                      |                                                                                                                                                                                                                                                                                                                                                                                                                                                                                                                                                                                                                                                                                                                                                                                                                                                                                                                                                                                                                                                                                                                                                                                                                                                                                                                                                                                                                                                                                                                                                                                                                                                                                                                                                                                                                                                        |                                                                                                                                                                                                                         |                         |                            |   |               |            |            |         |                       |            |            |       |  |                     |   |                     |  |  |                               |   |         |                |   |         |                 |   |         |                  |   |         |                        |   |         |                 |   |         |                          |   |         |        |   |         |                      |   |       |       |   |      |                                                      |  |  |              |   |         |                            |   |         |         |   |         |      |   |       |                 |   |         |                    |   |       |     |   |       |                                                         |  |  |                                                                                                                                                                                                                                                                                                                                                                                                                                                                                                                                                                                                                                                                                                                                                                                                                                                |
| Water                                                   | =                                                                                                                                                                                                                         | 0.69                                                                                                                                                                                                                                                                                                                                                                                                                                                                                                                                                                                |                                                          |                                                                                                                                                                                                                                                                                      |                                                                                                                                                                                                                                                                                                                                                                                                                                                                                                                                                                                                                                                                                                                                                                                                                                                                                                                                                                                                                                                                                                                                                                                                                                                                                                                                                                                                                                                                                                                                                                                                                                                                                                                                                                                                                                                        |                                                                                                                                                                                                                         |                         |                            |   |               |            |            |         |                       |            |            |       |  |                     |   |                     |  |  |                               |   |         |                |   |         |                 |   |         |                  |   |         |                        |   |         |                 |   |         |                          |   |         |        |   |         |                      |   |       |       |   |      |                                                      |  |  |              |   |         |                            |   |         |         |   |         |      |   |       |                 |   |         |                    |   |       |     |   |       |                                                         |  |  |                                                                                                                                                                                                                                                                                                                                                                                                                                                                                                                                                                                                                                                                                                                                                                                                                                                |
| <b>Frequent weekly intake (0–6 portion per week)</b>    |                                                                                                                                                                                                                           |                                                                                                                                                                                                                                                                                                                                                                                                                                                                                                                                                                                     |                                                          |                                                                                                                                                                                                                                                                                      |                                                                                                                                                                                                                                                                                                                                                                                                                                                                                                                                                                                                                                                                                                                                                                                                                                                                                                                                                                                                                                                                                                                                                                                                                                                                                                                                                                                                                                                                                                                                                                                                                                                                                                                                                                                                                                                        |                                                                                                                                                                                                                         |                         |                            |   |               |            |            |         |                       |            |            |       |  |                     |   |                     |  |  |                               |   |         |                |   |         |                 |   |         |                  |   |         |                        |   |         |                 |   |         |                          |   |         |        |   |         |                      |   |       |       |   |      |                                                      |  |  |              |   |         |                            |   |         |         |   |         |      |   |       |                 |   |         |                    |   |       |     |   |       |                                                         |  |  |                                                                                                                                                                                                                                                                                                                                                                                                                                                                                                                                                                                                                                                                                                                                                                                                                                                |
| Low-fat meat                                            | ↑                                                                                                                                                                                                                         | < 0.001                                                                                                                                                                                                                                                                                                                                                                                                                                                                                                                                                                             |                                                          |                                                                                                                                                                                                                                                                                      |                                                                                                                                                                                                                                                                                                                                                                                                                                                                                                                                                                                                                                                                                                                                                                                                                                                                                                                                                                                                                                                                                                                                                                                                                                                                                                                                                                                                                                                                                                                                                                                                                                                                                                                                                                                                                                                        |                                                                                                                                                                                                                         |                         |                            |   |               |            |            |         |                       |            |            |       |  |                     |   |                     |  |  |                               |   |         |                |   |         |                 |   |         |                  |   |         |                        |   |         |                 |   |         |                          |   |         |        |   |         |                      |   |       |       |   |      |                                                      |  |  |              |   |         |                            |   |         |         |   |         |      |   |       |                 |   |         |                    |   |       |     |   |       |                                                         |  |  |                                                                                                                                                                                                                                                                                                                                                                                                                                                                                                                                                                                                                                                                                                                                                                                                                                                |
| Cured meats other than ham                              | ↑                                                                                                                                                                                                                         | < 0.001                                                                                                                                                                                                                                                                                                                                                                                                                                                                                                                                                                             |                                                          |                                                                                                                                                                                                                                                                                      |                                                                                                                                                                                                                                                                                                                                                                                                                                                                                                                                                                                                                                                                                                                                                                                                                                                                                                                                                                                                                                                                                                                                                                                                                                                                                                                                                                                                                                                                                                                                                                                                                                                                                                                                                                                                                                                        |                                                                                                                                                                                                                         |                         |                            |   |               |            |            |         |                       |            |            |       |  |                     |   |                     |  |  |                               |   |         |                |   |         |                 |   |         |                  |   |         |                        |   |         |                 |   |         |                          |   |         |        |   |         |                      |   |       |       |   |      |                                                      |  |  |              |   |         |                            |   |         |         |   |         |      |   |       |                 |   |         |                    |   |       |     |   |       |                                                         |  |  |                                                                                                                                                                                                                                                                                                                                                                                                                                                                                                                                                                                                                                                                                                                                                                                                                                                |
| Cheeses                                                 | ↑                                                                                                                                                                                                                         | < 0.001                                                                                                                                                                                                                                                                                                                                                                                                                                                                                                                                                                             |                                                          |                                                                                                                                                                                                                                                                                      |                                                                                                                                                                                                                                                                                                                                                                                                                                                                                                                                                                                                                                                                                                                                                                                                                                                                                                                                                                                                                                                                                                                                                                                                                                                                                                                                                                                                                                                                                                                                                                                                                                                                                                                                                                                                                                                        |                                                                                                                                                                                                                         |                         |                            |   |               |            |            |         |                       |            |            |       |  |                     |   |                     |  |  |                               |   |         |                |   |         |                 |   |         |                  |   |         |                        |   |         |                 |   |         |                          |   |         |        |   |         |                      |   |       |       |   |      |                                                      |  |  |              |   |         |                            |   |         |         |   |         |      |   |       |                 |   |         |                    |   |       |     |   |       |                                                         |  |  |                                                                                                                                                                                                                                                                                                                                                                                                                                                                                                                                                                                                                                                                                                                                                                                                                                                |
| Eggs                                                    | ↑                                                                                                                                                                                                                         | 0.015                                                                                                                                                                                                                                                                                                                                                                                                                                                                                                                                                                               |                                                          |                                                                                                                                                                                                                                                                                      |                                                                                                                                                                                                                                                                                                                                                                                                                                                                                                                                                                                                                                                                                                                                                                                                                                                                                                                                                                                                                                                                                                                                                                                                                                                                                                                                                                                                                                                                                                                                                                                                                                                                                                                                                                                                                                                        |                                                                                                                                                                                                                         |                         |                            |   |               |            |            |         |                       |            |            |       |  |                     |   |                     |  |  |                               |   |         |                |   |         |                 |   |         |                  |   |         |                        |   |         |                 |   |         |                          |   |         |        |   |         |                      |   |       |       |   |      |                                                      |  |  |              |   |         |                            |   |         |         |   |         |      |   |       |                 |   |         |                    |   |       |     |   |       |                                                         |  |  |                                                                                                                                                                                                                                                                                                                                                                                                                                                                                                                                                                                                                                                                                                                                                                                                                                                |
| Mixed seed oils                                         | ↑                                                                                                                                                                                                                         | < 0.001                                                                                                                                                                                                                                                                                                                                                                                                                                                                                                                                                                             |                                                          |                                                                                                                                                                                                                                                                                      |                                                                                                                                                                                                                                                                                                                                                                                                                                                                                                                                                                                                                                                                                                                                                                                                                                                                                                                                                                                                                                                                                                                                                                                                                                                                                                                                                                                                                                                                                                                                                                                                                                                                                                                                                                                                                                                        |                                                                                                                                                                                                                         |                         |                            |   |               |            |            |         |                       |            |            |       |  |                     |   |                     |  |  |                               |   |         |                |   |         |                 |   |         |                  |   |         |                        |   |         |                 |   |         |                          |   |         |        |   |         |                      |   |       |       |   |      |                                                      |  |  |              |   |         |                            |   |         |         |   |         |      |   |       |                 |   |         |                    |   |       |     |   |       |                                                         |  |  |                                                                                                                                                                                                                                                                                                                                                                                                                                                                                                                                                                                                                                                                                                                                                                                                                                                |
| Non-cured fat meat                                      | =                                                                                                                                                                                                                         | 0.954                                                                                                                                                                                                                                                                                                                                                                                                                                                                                                                                                                               |                                                          |                                                                                                                                                                                                                                                                                      |                                                                                                                                                                                                                                                                                                                                                                                                                                                                                                                                                                                                                                                                                                                                                                                                                                                                                                                                                                                                                                                                                                                                                                                                                                                                                                                                                                                                                                                                                                                                                                                                                                                                                                                                                                                                                                                        |                                                                                                                                                                                                                         |                         |                            |   |               |            |            |         |                       |            |            |       |  |                     |   |                     |  |  |                               |   |         |                |   |         |                 |   |         |                  |   |         |                        |   |         |                 |   |         |                          |   |         |        |   |         |                      |   |       |       |   |      |                                                      |  |  |              |   |         |                            |   |         |         |   |         |      |   |       |                 |   |         |                    |   |       |     |   |       |                                                         |  |  |                                                                                                                                                                                                                                                                                                                                                                                                                                                                                                                                                                                                                                                                                                                                                                                                                                                |
| Ham                                                     | =                                                                                                                                                                                                                         | 0.835                                                                                                                                                                                                                                                                                                                                                                                                                                                                                                                                                                               |                                                          |                                                                                                                                                                                                                                                                                      |                                                                                                                                                                                                                                                                                                                                                                                                                                                                                                                                                                                                                                                                                                                                                                                                                                                                                                                                                                                                                                                                                                                                                                                                                                                                                                                                                                                                                                                                                                                                                                                                                                                                                                                                                                                                                                                        |                                                                                                                                                                                                                         |                         |                            |   |               |            |            |         |                       |            |            |       |  |                     |   |                     |  |  |                               |   |         |                |   |         |                 |   |         |                  |   |         |                        |   |         |                 |   |         |                          |   |         |        |   |         |                      |   |       |       |   |      |                                                      |  |  |              |   |         |                            |   |         |         |   |         |      |   |       |                 |   |         |                    |   |       |     |   |       |                                                         |  |  |                                                                                                                                                                                                                                                                                                                                                                                                                                                                                                                                                                                                                                                                                                                                                                                                                                                |
| <b>Less frequent week intake (0–3 portion per week)</b> |                                                                                                                                                                                                                           |                                                                                                                                                                                                                                                                                                                                                                                                                                                                                                                                                                                     |                                                          |                                                                                                                                                                                                                                                                                      |                                                                                                                                                                                                                                                                                                                                                                                                                                                                                                                                                                                                                                                                                                                                                                                                                                                                                                                                                                                                                                                                                                                                                                                                                                                                                                                                                                                                                                                                                                                                                                                                                                                                                                                                                                                                                                                        |                                                                                                                                                                                                                         |                         |                            |   |               |            |            |         |                       |            |            |       |  |                     |   |                     |  |  |                               |   |         |                |   |         |                 |   |         |                  |   |         |                        |   |         |                 |   |         |                          |   |         |        |   |         |                      |   |       |       |   |      |                                                      |  |  |              |   |         |                            |   |         |         |   |         |      |   |       |                 |   |         |                    |   |       |     |   |       |                                                         |  |  |                                                                                                                                                                                                                                                                                                                                                                                                                                                                                                                                                                                                                                                                                                                                                                                                                                                |

| Reference<br>(First author, publication year) | General<br>(Study design<br>Study name<br>Country of study<br>Time of study<br>No. of waves<br>Follow-up duration<br>(e.g., mean, range)) | Population<br>(Description<br>Inclusion criteria<br># invited<br># baseline<br># follow-up<br>Age at baseline<br>% females<br>Response<br>Lost to follow-up) | Exposure<br>(Description & assessment) | Outcome<br>(Description & assessment) | Results<br>(Description of all topically relevant results)                                                                                                                                                                                                                                                                                                                                                                                                                                                                                                                                                                                                                                                                                                                                                                                                                                                                                                                                                                                                                                                                                                                                                                                                                                                                                                                                                                                                                                                                                                                                                                                   | Comments<br>(study quality [overall assessment according to Iljaz/Shamliyan/SIGN/CASP]<br>Conflict of interest [stated vs. not stated]<br>Funding (public, non-profit, commercial)<br>Strengths (+) and weaknesses (-)) |   |         |                       |   |         |         |   |         |      |   |       |  |                                |                                   |          |                      |            |            |       |               |           |           |       |            |            |            |       |            |           |           |       |          |            |            |       |  |                                |                                   |          |         |           |           |       |  |                       |           |     |          |     |  |                                |                                   |          |  |
|-----------------------------------------------|-------------------------------------------------------------------------------------------------------------------------------------------|--------------------------------------------------------------------------------------------------------------------------------------------------------------|----------------------------------------|---------------------------------------|----------------------------------------------------------------------------------------------------------------------------------------------------------------------------------------------------------------------------------------------------------------------------------------------------------------------------------------------------------------------------------------------------------------------------------------------------------------------------------------------------------------------------------------------------------------------------------------------------------------------------------------------------------------------------------------------------------------------------------------------------------------------------------------------------------------------------------------------------------------------------------------------------------------------------------------------------------------------------------------------------------------------------------------------------------------------------------------------------------------------------------------------------------------------------------------------------------------------------------------------------------------------------------------------------------------------------------------------------------------------------------------------------------------------------------------------------------------------------------------------------------------------------------------------------------------------------------------------------------------------------------------------|-------------------------------------------------------------------------------------------------------------------------------------------------------------------------------------------------------------------------|---|---------|-----------------------|---|---------|---------|---|---------|------|---|-------|--|--------------------------------|-----------------------------------|----------|----------------------|------------|------------|-------|---------------|-----------|-----------|-------|------------|------------|------------|-------|------------|-----------|-----------|-------|----------|------------|------------|-------|--|--------------------------------|-----------------------------------|----------|---------|-----------|-----------|-------|--|-----------------------|-----------|-----|----------|-----|--|--------------------------------|-----------------------------------|----------|--|
|                                               |                                                                                                                                           |                                                                                                                                                              |                                        |                                       | <table><tr><td>Fish</td><td>↓</td><td>&lt; 0.001</td></tr><tr><td>Mussels and shellfish</td><td>↓</td><td>&lt; 0.001</td></tr><tr><td>Legumes</td><td>↓</td><td>&lt; 0.001</td></tr><tr><td>Nuts</td><td>↑</td><td>0.042</td></tr></table> <p><b>Table 2: Percentage of total energy derived from the main diet components</b></p> <table><tr><td></td><td><b>Pre-quarantine (% (SD))</b></td><td><b>During quarantine (% (SD))</b></td><td><b>p</b></td></tr><tr><td>Total carbo-hydrates</td><td>49.3 (4.6)</td><td>52.6 (6.5)</td><td>0.048</td></tr><tr><td>Simple sugars</td><td>3.1 (0.9)</td><td>4.6 (1.1)</td><td>0.002</td></tr><tr><td>Total fats</td><td>28.1 (3.2)</td><td>31.4 (2.9)</td><td>0.047</td></tr><tr><td>Added fats</td><td>3.9 (1.1)</td><td>4.3 (1.2)</td><td>0.021</td></tr><tr><td>Proteins</td><td>16.2 (2.6)</td><td>10.1 (2.7)</td><td>0.003</td></tr></table> <p><b>Table 2: Percentage of total energy derived from the alcohol</b></p> <table><tr><td></td><td><b>Pre-quarantine (% (SD))</b></td><td><b>During quarantine (% (SD))</b></td><td><b>p</b></td></tr><tr><td>Alcohol</td><td>2.9 (0.6)</td><td>4.9 (1.0)</td><td>0.002</td></tr></table> <p><b>Text: Descriptive statistics for the change in smoking since lockdown</b></p> <table><tr><td></td><td><b>Prevalence (%)</b></td></tr><tr><td>Reduction</td><td>2.2</td></tr><tr><td>Increase</td><td>1.7</td></tr></table> <p><b>Text: Change in body mass index (kg/m<sup>2</sup>) since lockdown</b></p> <table><tr><td></td><td><b>Pre-quarantine (M (SD))</b></td><td><b>During quarantine (M (SD))</b></td><td><b>p</b></td></tr></table> | Fish                                                                                                                                                                                                                    | ↓ | < 0.001 | Mussels and shellfish | ↓ | < 0.001 | Legumes | ↓ | < 0.001 | Nuts | ↑ | 0.042 |  | <b>Pre-quarantine (% (SD))</b> | <b>During quarantine (% (SD))</b> | <b>p</b> | Total carbo-hydrates | 49.3 (4.6) | 52.6 (6.5) | 0.048 | Simple sugars | 3.1 (0.9) | 4.6 (1.1) | 0.002 | Total fats | 28.1 (3.2) | 31.4 (2.9) | 0.047 | Added fats | 3.9 (1.1) | 4.3 (1.2) | 0.021 | Proteins | 16.2 (2.6) | 10.1 (2.7) | 0.003 |  | <b>Pre-quarantine (% (SD))</b> | <b>During quarantine (% (SD))</b> | <b>p</b> | Alcohol | 2.9 (0.6) | 4.9 (1.0) | 0.002 |  | <b>Prevalence (%)</b> | Reduction | 2.2 | Increase | 1.7 |  | <b>Pre-quarantine (M (SD))</b> | <b>During quarantine (M (SD))</b> | <b>p</b> |  |
| Fish                                          | ↓                                                                                                                                         | < 0.001                                                                                                                                                      |                                        |                                       |                                                                                                                                                                                                                                                                                                                                                                                                                                                                                                                                                                                                                                                                                                                                                                                                                                                                                                                                                                                                                                                                                                                                                                                                                                                                                                                                                                                                                                                                                                                                                                                                                                              |                                                                                                                                                                                                                         |   |         |                       |   |         |         |   |         |      |   |       |  |                                |                                   |          |                      |            |            |       |               |           |           |       |            |            |            |       |            |           |           |       |          |            |            |       |  |                                |                                   |          |         |           |           |       |  |                       |           |     |          |     |  |                                |                                   |          |  |
| Mussels and shellfish                         | ↓                                                                                                                                         | < 0.001                                                                                                                                                      |                                        |                                       |                                                                                                                                                                                                                                                                                                                                                                                                                                                                                                                                                                                                                                                                                                                                                                                                                                                                                                                                                                                                                                                                                                                                                                                                                                                                                                                                                                                                                                                                                                                                                                                                                                              |                                                                                                                                                                                                                         |   |         |                       |   |         |         |   |         |      |   |       |  |                                |                                   |          |                      |            |            |       |               |           |           |       |            |            |            |       |            |           |           |       |          |            |            |       |  |                                |                                   |          |         |           |           |       |  |                       |           |     |          |     |  |                                |                                   |          |  |
| Legumes                                       | ↓                                                                                                                                         | < 0.001                                                                                                                                                      |                                        |                                       |                                                                                                                                                                                                                                                                                                                                                                                                                                                                                                                                                                                                                                                                                                                                                                                                                                                                                                                                                                                                                                                                                                                                                                                                                                                                                                                                                                                                                                                                                                                                                                                                                                              |                                                                                                                                                                                                                         |   |         |                       |   |         |         |   |         |      |   |       |  |                                |                                   |          |                      |            |            |       |               |           |           |       |            |            |            |       |            |           |           |       |          |            |            |       |  |                                |                                   |          |         |           |           |       |  |                       |           |     |          |     |  |                                |                                   |          |  |
| Nuts                                          | ↑                                                                                                                                         | 0.042                                                                                                                                                        |                                        |                                       |                                                                                                                                                                                                                                                                                                                                                                                                                                                                                                                                                                                                                                                                                                                                                                                                                                                                                                                                                                                                                                                                                                                                                                                                                                                                                                                                                                                                                                                                                                                                                                                                                                              |                                                                                                                                                                                                                         |   |         |                       |   |         |         |   |         |      |   |       |  |                                |                                   |          |                      |            |            |       |               |           |           |       |            |            |            |       |            |           |           |       |          |            |            |       |  |                                |                                   |          |         |           |           |       |  |                       |           |     |          |     |  |                                |                                   |          |  |
|                                               | <b>Pre-quarantine (% (SD))</b>                                                                                                            | <b>During quarantine (% (SD))</b>                                                                                                                            | <b>p</b>                               |                                       |                                                                                                                                                                                                                                                                                                                                                                                                                                                                                                                                                                                                                                                                                                                                                                                                                                                                                                                                                                                                                                                                                                                                                                                                                                                                                                                                                                                                                                                                                                                                                                                                                                              |                                                                                                                                                                                                                         |   |         |                       |   |         |         |   |         |      |   |       |  |                                |                                   |          |                      |            |            |       |               |           |           |       |            |            |            |       |            |           |           |       |          |            |            |       |  |                                |                                   |          |         |           |           |       |  |                       |           |     |          |     |  |                                |                                   |          |  |
| Total carbo-hydrates                          | 49.3 (4.6)                                                                                                                                | 52.6 (6.5)                                                                                                                                                   | 0.048                                  |                                       |                                                                                                                                                                                                                                                                                                                                                                                                                                                                                                                                                                                                                                                                                                                                                                                                                                                                                                                                                                                                                                                                                                                                                                                                                                                                                                                                                                                                                                                                                                                                                                                                                                              |                                                                                                                                                                                                                         |   |         |                       |   |         |         |   |         |      |   |       |  |                                |                                   |          |                      |            |            |       |               |           |           |       |            |            |            |       |            |           |           |       |          |            |            |       |  |                                |                                   |          |         |           |           |       |  |                       |           |     |          |     |  |                                |                                   |          |  |
| Simple sugars                                 | 3.1 (0.9)                                                                                                                                 | 4.6 (1.1)                                                                                                                                                    | 0.002                                  |                                       |                                                                                                                                                                                                                                                                                                                                                                                                                                                                                                                                                                                                                                                                                                                                                                                                                                                                                                                                                                                                                                                                                                                                                                                                                                                                                                                                                                                                                                                                                                                                                                                                                                              |                                                                                                                                                                                                                         |   |         |                       |   |         |         |   |         |      |   |       |  |                                |                                   |          |                      |            |            |       |               |           |           |       |            |            |            |       |            |           |           |       |          |            |            |       |  |                                |                                   |          |         |           |           |       |  |                       |           |     |          |     |  |                                |                                   |          |  |
| Total fats                                    | 28.1 (3.2)                                                                                                                                | 31.4 (2.9)                                                                                                                                                   | 0.047                                  |                                       |                                                                                                                                                                                                                                                                                                                                                                                                                                                                                                                                                                                                                                                                                                                                                                                                                                                                                                                                                                                                                                                                                                                                                                                                                                                                                                                                                                                                                                                                                                                                                                                                                                              |                                                                                                                                                                                                                         |   |         |                       |   |         |         |   |         |      |   |       |  |                                |                                   |          |                      |            |            |       |               |           |           |       |            |            |            |       |            |           |           |       |          |            |            |       |  |                                |                                   |          |         |           |           |       |  |                       |           |     |          |     |  |                                |                                   |          |  |
| Added fats                                    | 3.9 (1.1)                                                                                                                                 | 4.3 (1.2)                                                                                                                                                    | 0.021                                  |                                       |                                                                                                                                                                                                                                                                                                                                                                                                                                                                                                                                                                                                                                                                                                                                                                                                                                                                                                                                                                                                                                                                                                                                                                                                                                                                                                                                                                                                                                                                                                                                                                                                                                              |                                                                                                                                                                                                                         |   |         |                       |   |         |         |   |         |      |   |       |  |                                |                                   |          |                      |            |            |       |               |           |           |       |            |            |            |       |            |           |           |       |          |            |            |       |  |                                |                                   |          |         |           |           |       |  |                       |           |     |          |     |  |                                |                                   |          |  |
| Proteins                                      | 16.2 (2.6)                                                                                                                                | 10.1 (2.7)                                                                                                                                                   | 0.003                                  |                                       |                                                                                                                                                                                                                                                                                                                                                                                                                                                                                                                                                                                                                                                                                                                                                                                                                                                                                                                                                                                                                                                                                                                                                                                                                                                                                                                                                                                                                                                                                                                                                                                                                                              |                                                                                                                                                                                                                         |   |         |                       |   |         |         |   |         |      |   |       |  |                                |                                   |          |                      |            |            |       |               |           |           |       |            |            |            |       |            |           |           |       |          |            |            |       |  |                                |                                   |          |         |           |           |       |  |                       |           |     |          |     |  |                                |                                   |          |  |
|                                               | <b>Pre-quarantine (% (SD))</b>                                                                                                            | <b>During quarantine (% (SD))</b>                                                                                                                            | <b>p</b>                               |                                       |                                                                                                                                                                                                                                                                                                                                                                                                                                                                                                                                                                                                                                                                                                                                                                                                                                                                                                                                                                                                                                                                                                                                                                                                                                                                                                                                                                                                                                                                                                                                                                                                                                              |                                                                                                                                                                                                                         |   |         |                       |   |         |         |   |         |      |   |       |  |                                |                                   |          |                      |            |            |       |               |           |           |       |            |            |            |       |            |           |           |       |          |            |            |       |  |                                |                                   |          |         |           |           |       |  |                       |           |     |          |     |  |                                |                                   |          |  |
| Alcohol                                       | 2.9 (0.6)                                                                                                                                 | 4.9 (1.0)                                                                                                                                                    | 0.002                                  |                                       |                                                                                                                                                                                                                                                                                                                                                                                                                                                                                                                                                                                                                                                                                                                                                                                                                                                                                                                                                                                                                                                                                                                                                                                                                                                                                                                                                                                                                                                                                                                                                                                                                                              |                                                                                                                                                                                                                         |   |         |                       |   |         |         |   |         |      |   |       |  |                                |                                   |          |                      |            |            |       |               |           |           |       |            |            |            |       |            |           |           |       |          |            |            |       |  |                                |                                   |          |         |           |           |       |  |                       |           |     |          |     |  |                                |                                   |          |  |
|                                               | <b>Prevalence (%)</b>                                                                                                                     |                                                                                                                                                              |                                        |                                       |                                                                                                                                                                                                                                                                                                                                                                                                                                                                                                                                                                                                                                                                                                                                                                                                                                                                                                                                                                                                                                                                                                                                                                                                                                                                                                                                                                                                                                                                                                                                                                                                                                              |                                                                                                                                                                                                                         |   |         |                       |   |         |         |   |         |      |   |       |  |                                |                                   |          |                      |            |            |       |               |           |           |       |            |            |            |       |            |           |           |       |          |            |            |       |  |                                |                                   |          |         |           |           |       |  |                       |           |     |          |     |  |                                |                                   |          |  |
| Reduction                                     | 2.2                                                                                                                                       |                                                                                                                                                              |                                        |                                       |                                                                                                                                                                                                                                                                                                                                                                                                                                                                                                                                                                                                                                                                                                                                                                                                                                                                                                                                                                                                                                                                                                                                                                                                                                                                                                                                                                                                                                                                                                                                                                                                                                              |                                                                                                                                                                                                                         |   |         |                       |   |         |         |   |         |      |   |       |  |                                |                                   |          |                      |            |            |       |               |           |           |       |            |            |            |       |            |           |           |       |          |            |            |       |  |                                |                                   |          |         |           |           |       |  |                       |           |     |          |     |  |                                |                                   |          |  |
| Increase                                      | 1.7                                                                                                                                       |                                                                                                                                                              |                                        |                                       |                                                                                                                                                                                                                                                                                                                                                                                                                                                                                                                                                                                                                                                                                                                                                                                                                                                                                                                                                                                                                                                                                                                                                                                                                                                                                                                                                                                                                                                                                                                                                                                                                                              |                                                                                                                                                                                                                         |   |         |                       |   |         |         |   |         |      |   |       |  |                                |                                   |          |                      |            |            |       |               |           |           |       |            |            |            |       |            |           |           |       |          |            |            |       |  |                                |                                   |          |         |           |           |       |  |                       |           |     |          |     |  |                                |                                   |          |  |
|                                               | <b>Pre-quarantine (M (SD))</b>                                                                                                            | <b>During quarantine (M (SD))</b>                                                                                                                            | <b>p</b>                               |                                       |                                                                                                                                                                                                                                                                                                                                                                                                                                                                                                                                                                                                                                                                                                                                                                                                                                                                                                                                                                                                                                                                                                                                                                                                                                                                                                                                                                                                                                                                                                                                                                                                                                              |                                                                                                                                                                                                                         |   |         |                       |   |         |         |   |         |      |   |       |  |                                |                                   |          |                      |            |            |       |               |           |           |       |            |            |            |       |            |           |           |       |          |            |            |       |  |                                |                                   |          |         |           |           |       |  |                       |           |     |          |     |  |                                |                                   |          |  |

| Reference<br>(First author, publication year) | General<br>(Study design<br>Study name<br>Country of study<br>Time of study<br>No. of waves<br>Follow-up duration<br>(e.g., mean, range))                                                                                                                                               | Population<br>(Description<br>Inclusion criteria<br># invited<br># baseline<br># follow-up<br>Age at baseline<br>% females<br>Response<br>Lost to follow-up)                                                                                                                                                                                                                                                                                                                                                                                                                                                                                                                 | Exposure<br>(Description & assessment)                                                                                                      | Outcome<br>(Description & assessment)                                                                                                                                                                        | Results<br>(Description of all topically relevant results)                                                                                                                                                                                                                                                                                                                                                                                                                                                                                                                                                                                                                                                                                                                                                                                                                                                                                                                                                                                                                                                                                                                                                                                                                                                                                                                                                                 | Comments<br>(study quality [overall assessment according to Ilijaz/Shamliyan/SIGN/CASP]<br>Conflict of interest [stated vs. not stated]<br>Funding (public, non-profit, commercial)<br>Strengths (+) and weaknesses (-)) |                         |            |       |     |                  |       |                  |             |  |     |                  |       |                  |             |  |     |                  |       |                  |                 |  |     |                  |       |                  |  |                         |         |  |     |                  |       |                  |             |  |     |                  |       |                  |             |  |     |                  |       |                  |                 |  |     |                  |       |                  |                                                                                                                                                                                                                                                                                                                                                                                             |
|-----------------------------------------------|-----------------------------------------------------------------------------------------------------------------------------------------------------------------------------------------------------------------------------------------------------------------------------------------|------------------------------------------------------------------------------------------------------------------------------------------------------------------------------------------------------------------------------------------------------------------------------------------------------------------------------------------------------------------------------------------------------------------------------------------------------------------------------------------------------------------------------------------------------------------------------------------------------------------------------------------------------------------------------|---------------------------------------------------------------------------------------------------------------------------------------------|--------------------------------------------------------------------------------------------------------------------------------------------------------------------------------------------------------------|----------------------------------------------------------------------------------------------------------------------------------------------------------------------------------------------------------------------------------------------------------------------------------------------------------------------------------------------------------------------------------------------------------------------------------------------------------------------------------------------------------------------------------------------------------------------------------------------------------------------------------------------------------------------------------------------------------------------------------------------------------------------------------------------------------------------------------------------------------------------------------------------------------------------------------------------------------------------------------------------------------------------------------------------------------------------------------------------------------------------------------------------------------------------------------------------------------------------------------------------------------------------------------------------------------------------------------------------------------------------------------------------------------------------------|--------------------------------------------------------------------------------------------------------------------------------------------------------------------------------------------------------------------------|-------------------------|------------|-------|-----|------------------|-------|------------------|-------------|--|-----|------------------|-------|------------------|-------------|--|-----|------------------|-------|------------------|-----------------|--|-----|------------------|-------|------------------|--|-------------------------|---------|--|-----|------------------|-------|------------------|-------------|--|-----|------------------|-------|------------------|-------------|--|-----|------------------|-------|------------------|-----------------|--|-----|------------------|-------|------------------|---------------------------------------------------------------------------------------------------------------------------------------------------------------------------------------------------------------------------------------------------------------------------------------------------------------------------------------------------------------------------------------------|
|                                               |                                                                                                                                                                                                                                                                                         |                                                                                                                                                                                                                                                                                                                                                                                                                                                                                                                                                                                                                                                                              |                                                                                                                                             |                                                                                                                                                                                                              | <table><tr><td>Body mass index</td><td>26.6 (4.7)</td><td>26.9 (4.5)</td><td>0.361</td></tr></table> Results were confirmed by repeating the analysis by gender, education level, and age class.                                                                                                                                                                                                                                                                                                                                                                                                                                                                                                                                                                                                                                                                                                                                                                                                                                                                                                                                                                                                                                                                                                                                                                                                                           | Body mass index                                                                                                                                                                                                          | 26.6 (4.7)              | 26.9 (4.5) | 0.361 |     |                  |       |                  |             |  |     |                  |       |                  |             |  |     |                  |       |                  |                 |  |     |                  |       |                  |  |                         |         |  |     |                  |       |                  |             |  |     |                  |       |                  |             |  |     |                  |       |                  |                 |  |     |                  |       |                  |                                                                                                                                                                                                                                                                                                                                                                                             |
| Body mass index                               | 26.6 (4.7)                                                                                                                                                                                                                                                                              | 26.9 (4.5)                                                                                                                                                                                                                                                                                                                                                                                                                                                                                                                                                                                                                                                                   | 0.361                                                                                                                                       |                                                                                                                                                                                                              |                                                                                                                                                                                                                                                                                                                                                                                                                                                                                                                                                                                                                                                                                                                                                                                                                                                                                                                                                                                                                                                                                                                                                                                                                                                                                                                                                                                                                            |                                                                                                                                                                                                                          |                         |            |       |     |                  |       |                  |             |  |     |                  |       |                  |             |  |     |                  |       |                  |                 |  |     |                  |       |                  |  |                         |         |  |     |                  |       |                  |             |  |     |                  |       |                  |             |  |     |                  |       |                  |                 |  |     |                  |       |                  |                                                                                                                                                                                                                                                                                                                                                                                             |
| Colley et al., 2020                           | <b>Study design:</b> Cross-sectional study<br><b>Study name:</b> Canadian Perspective Survey Series – Impacts of COVID-19 (CPSS1)<br><b>Country of study:</b> Canada<br><b>Time of study:</b> March 29–April 3, 2020<br><b>No. of waves:</b> $n = 1$<br><b>Follow-up duration:</b> n.a. | <b>Description:</b> Adults (1 household member selected at random from four Labour Force Survey (LFS) groups that answered the LFS for the last time in 2019)<br><b>Inclusion criteria:</b> Canadian residents aged $\geq 20$ years, living in the 10 provinces, exclusion of persons living on reserves and Aboriginal settlements in the provinces; full-time members of the Canadian Armed Forces; the institutionalized population; and households in extremely remote areas with very low population density<br><b># invited:</b> $n = 7,242$<br><b># baseline:</b> $n = 4,524$<br><b># follow-up:</b> n.a.<br><b>Age at baseline:</b> n.r.<br><b>% females:</b> 53.4 % | <b>Physical distancing measures</b> (implemented in March 2020):<br>- border, school, and business closures<br>- avoiding unnecessary trips | <b>Screen time behaviours:</b><br>3 self-reported single questions (“Have your weekly habits changed for any of the following activities?”: watching TV, spending time on the internet, playing video games) | <b>Table 1: Descriptive statistics for an increase in watching TV</b> <table><tr><td></td><td>Prevalence (%) (95% CI)</td></tr><tr><td>Overall</td><td></td></tr><tr><td>Men</td><td>59.8 (56.3–63.2)</td></tr><tr><td>Women</td><td>66.0 (63.2–68.6)</td></tr><tr><td>20–34 years</td><td></td></tr><tr><td>Men</td><td>59.6 (50.4–68.2)</td></tr><tr><td>Women</td><td>72.7 (66.2–78.3)</td></tr><tr><td>35–54 years</td><td></td></tr><tr><td>Men</td><td>61.8 (56.2–67.2)</td></tr><tr><td>Women</td><td>68.1 (63.6–72.4)</td></tr><tr><td><math>\geq 55</math> years</td><td></td></tr><tr><td>Men</td><td>58.1 (53.4–62.7)</td></tr><tr><td>Women</td><td>60.2 (55.7–64.5)</td></tr></table><br><b>Table 1: Descriptive statistics for an increase in spending time on the internet</b> <table><tr><td></td><td>Prevalence (%) (95% CI)</td></tr><tr><td>Overall</td><td></td></tr><tr><td>Men</td><td>63.5 (60.2–66.6)</td></tr><tr><td>Women</td><td>68.7 (65.6–71.6)</td></tr><tr><td>20–34 years</td><td></td></tr><tr><td>Men</td><td>75.8 (67.6–82.5)</td></tr><tr><td>Women</td><td>74.8 (67.5–80.9)</td></tr><tr><td>35–54 years</td><td></td></tr><tr><td>Men</td><td>62.9 (57.2–68.2)</td></tr><tr><td>Women</td><td>74.2 (69.8–78.3)</td></tr><tr><td><math>\geq 55</math> years</td><td></td></tr><tr><td>Men</td><td>55.9 (51.1–60.7)</td></tr><tr><td>Women</td><td>60.5 (55.8–65.1)</td></tr></table> |                                                                                                                                                                                                                          | Prevalence (%) (95% CI) | Overall    |       | Men | 59.8 (56.3–63.2) | Women | 66.0 (63.2–68.6) | 20–34 years |  | Men | 59.6 (50.4–68.2) | Women | 72.7 (66.2–78.3) | 35–54 years |  | Men | 61.8 (56.2–67.2) | Women | 68.1 (63.6–72.4) | $\geq 55$ years |  | Men | 58.1 (53.4–62.7) | Women | 60.2 (55.7–64.5) |  | Prevalence (%) (95% CI) | Overall |  | Men | 63.5 (60.2–66.6) | Women | 68.7 (65.6–71.6) | 20–34 years |  | Men | 75.8 (67.6–82.5) | Women | 74.8 (67.5–80.9) | 35–54 years |  | Men | 62.9 (57.2–68.2) | Women | 74.2 (69.8–78.3) | $\geq 55$ years |  | Men | 55.9 (51.1–60.7) | Women | 60.5 (55.8–65.1) | <b>Overall study quality:</b> High risk<br><b>Conflict of interest:</b> Unclear<br><b>Funding:</b> Unclear<br><br>+ random sampling<br>+ high response<br>+ consideration of confounders “sex” and “age” (by stratification)<br><br>- outcome measurement with self-reported single questions<br>- descriptive analysis only<br>- due to study design no actual chronological investigation |
|                                               | Prevalence (%) (95% CI)                                                                                                                                                                                                                                                                 |                                                                                                                                                                                                                                                                                                                                                                                                                                                                                                                                                                                                                                                                              |                                                                                                                                             |                                                                                                                                                                                                              |                                                                                                                                                                                                                                                                                                                                                                                                                                                                                                                                                                                                                                                                                                                                                                                                                                                                                                                                                                                                                                                                                                                                                                                                                                                                                                                                                                                                                            |                                                                                                                                                                                                                          |                         |            |       |     |                  |       |                  |             |  |     |                  |       |                  |             |  |     |                  |       |                  |                 |  |     |                  |       |                  |  |                         |         |  |     |                  |       |                  |             |  |     |                  |       |                  |             |  |     |                  |       |                  |                 |  |     |                  |       |                  |                                                                                                                                                                                                                                                                                                                                                                                             |
| Overall                                       |                                                                                                                                                                                                                                                                                         |                                                                                                                                                                                                                                                                                                                                                                                                                                                                                                                                                                                                                                                                              |                                                                                                                                             |                                                                                                                                                                                                              |                                                                                                                                                                                                                                                                                                                                                                                                                                                                                                                                                                                                                                                                                                                                                                                                                                                                                                                                                                                                                                                                                                                                                                                                                                                                                                                                                                                                                            |                                                                                                                                                                                                                          |                         |            |       |     |                  |       |                  |             |  |     |                  |       |                  |             |  |     |                  |       |                  |                 |  |     |                  |       |                  |  |                         |         |  |     |                  |       |                  |             |  |     |                  |       |                  |             |  |     |                  |       |                  |                 |  |     |                  |       |                  |                                                                                                                                                                                                                                                                                                                                                                                             |
| Men                                           | 59.8 (56.3–63.2)                                                                                                                                                                                                                                                                        |                                                                                                                                                                                                                                                                                                                                                                                                                                                                                                                                                                                                                                                                              |                                                                                                                                             |                                                                                                                                                                                                              |                                                                                                                                                                                                                                                                                                                                                                                                                                                                                                                                                                                                                                                                                                                                                                                                                                                                                                                                                                                                                                                                                                                                                                                                                                                                                                                                                                                                                            |                                                                                                                                                                                                                          |                         |            |       |     |                  |       |                  |             |  |     |                  |       |                  |             |  |     |                  |       |                  |                 |  |     |                  |       |                  |  |                         |         |  |     |                  |       |                  |             |  |     |                  |       |                  |             |  |     |                  |       |                  |                 |  |     |                  |       |                  |                                                                                                                                                                                                                                                                                                                                                                                             |
| Women                                         | 66.0 (63.2–68.6)                                                                                                                                                                                                                                                                        |                                                                                                                                                                                                                                                                                                                                                                                                                                                                                                                                                                                                                                                                              |                                                                                                                                             |                                                                                                                                                                                                              |                                                                                                                                                                                                                                                                                                                                                                                                                                                                                                                                                                                                                                                                                                                                                                                                                                                                                                                                                                                                                                                                                                                                                                                                                                                                                                                                                                                                                            |                                                                                                                                                                                                                          |                         |            |       |     |                  |       |                  |             |  |     |                  |       |                  |             |  |     |                  |       |                  |                 |  |     |                  |       |                  |  |                         |         |  |     |                  |       |                  |             |  |     |                  |       |                  |             |  |     |                  |       |                  |                 |  |     |                  |       |                  |                                                                                                                                                                                                                                                                                                                                                                                             |
| 20–34 years                                   |                                                                                                                                                                                                                                                                                         |                                                                                                                                                                                                                                                                                                                                                                                                                                                                                                                                                                                                                                                                              |                                                                                                                                             |                                                                                                                                                                                                              |                                                                                                                                                                                                                                                                                                                                                                                                                                                                                                                                                                                                                                                                                                                                                                                                                                                                                                                                                                                                                                                                                                                                                                                                                                                                                                                                                                                                                            |                                                                                                                                                                                                                          |                         |            |       |     |                  |       |                  |             |  |     |                  |       |                  |             |  |     |                  |       |                  |                 |  |     |                  |       |                  |  |                         |         |  |     |                  |       |                  |             |  |     |                  |       |                  |             |  |     |                  |       |                  |                 |  |     |                  |       |                  |                                                                                                                                                                                                                                                                                                                                                                                             |
| Men                                           | 59.6 (50.4–68.2)                                                                                                                                                                                                                                                                        |                                                                                                                                                                                                                                                                                                                                                                                                                                                                                                                                                                                                                                                                              |                                                                                                                                             |                                                                                                                                                                                                              |                                                                                                                                                                                                                                                                                                                                                                                                                                                                                                                                                                                                                                                                                                                                                                                                                                                                                                                                                                                                                                                                                                                                                                                                                                                                                                                                                                                                                            |                                                                                                                                                                                                                          |                         |            |       |     |                  |       |                  |             |  |     |                  |       |                  |             |  |     |                  |       |                  |                 |  |     |                  |       |                  |  |                         |         |  |     |                  |       |                  |             |  |     |                  |       |                  |             |  |     |                  |       |                  |                 |  |     |                  |       |                  |                                                                                                                                                                                                                                                                                                                                                                                             |
| Women                                         | 72.7 (66.2–78.3)                                                                                                                                                                                                                                                                        |                                                                                                                                                                                                                                                                                                                                                                                                                                                                                                                                                                                                                                                                              |                                                                                                                                             |                                                                                                                                                                                                              |                                                                                                                                                                                                                                                                                                                                                                                                                                                                                                                                                                                                                                                                                                                                                                                                                                                                                                                                                                                                                                                                                                                                                                                                                                                                                                                                                                                                                            |                                                                                                                                                                                                                          |                         |            |       |     |                  |       |                  |             |  |     |                  |       |                  |             |  |     |                  |       |                  |                 |  |     |                  |       |                  |  |                         |         |  |     |                  |       |                  |             |  |     |                  |       |                  |             |  |     |                  |       |                  |                 |  |     |                  |       |                  |                                                                                                                                                                                                                                                                                                                                                                                             |
| 35–54 years                                   |                                                                                                                                                                                                                                                                                         |                                                                                                                                                                                                                                                                                                                                                                                                                                                                                                                                                                                                                                                                              |                                                                                                                                             |                                                                                                                                                                                                              |                                                                                                                                                                                                                                                                                                                                                                                                                                                                                                                                                                                                                                                                                                                                                                                                                                                                                                                                                                                                                                                                                                                                                                                                                                                                                                                                                                                                                            |                                                                                                                                                                                                                          |                         |            |       |     |                  |       |                  |             |  |     |                  |       |                  |             |  |     |                  |       |                  |                 |  |     |                  |       |                  |  |                         |         |  |     |                  |       |                  |             |  |     |                  |       |                  |             |  |     |                  |       |                  |                 |  |     |                  |       |                  |                                                                                                                                                                                                                                                                                                                                                                                             |
| Men                                           | 61.8 (56.2–67.2)                                                                                                                                                                                                                                                                        |                                                                                                                                                                                                                                                                                                                                                                                                                                                                                                                                                                                                                                                                              |                                                                                                                                             |                                                                                                                                                                                                              |                                                                                                                                                                                                                                                                                                                                                                                                                                                                                                                                                                                                                                                                                                                                                                                                                                                                                                                                                                                                                                                                                                                                                                                                                                                                                                                                                                                                                            |                                                                                                                                                                                                                          |                         |            |       |     |                  |       |                  |             |  |     |                  |       |                  |             |  |     |                  |       |                  |                 |  |     |                  |       |                  |  |                         |         |  |     |                  |       |                  |             |  |     |                  |       |                  |             |  |     |                  |       |                  |                 |  |     |                  |       |                  |                                                                                                                                                                                                                                                                                                                                                                                             |
| Women                                         | 68.1 (63.6–72.4)                                                                                                                                                                                                                                                                        |                                                                                                                                                                                                                                                                                                                                                                                                                                                                                                                                                                                                                                                                              |                                                                                                                                             |                                                                                                                                                                                                              |                                                                                                                                                                                                                                                                                                                                                                                                                                                                                                                                                                                                                                                                                                                                                                                                                                                                                                                                                                                                                                                                                                                                                                                                                                                                                                                                                                                                                            |                                                                                                                                                                                                                          |                         |            |       |     |                  |       |                  |             |  |     |                  |       |                  |             |  |     |                  |       |                  |                 |  |     |                  |       |                  |  |                         |         |  |     |                  |       |                  |             |  |     |                  |       |                  |             |  |     |                  |       |                  |                 |  |     |                  |       |                  |                                                                                                                                                                                                                                                                                                                                                                                             |
| $\geq 55$ years                               |                                                                                                                                                                                                                                                                                         |                                                                                                                                                                                                                                                                                                                                                                                                                                                                                                                                                                                                                                                                              |                                                                                                                                             |                                                                                                                                                                                                              |                                                                                                                                                                                                                                                                                                                                                                                                                                                                                                                                                                                                                                                                                                                                                                                                                                                                                                                                                                                                                                                                                                                                                                                                                                                                                                                                                                                                                            |                                                                                                                                                                                                                          |                         |            |       |     |                  |       |                  |             |  |     |                  |       |                  |             |  |     |                  |       |                  |                 |  |     |                  |       |                  |  |                         |         |  |     |                  |       |                  |             |  |     |                  |       |                  |             |  |     |                  |       |                  |                 |  |     |                  |       |                  |                                                                                                                                                                                                                                                                                                                                                                                             |
| Men                                           | 58.1 (53.4–62.7)                                                                                                                                                                                                                                                                        |                                                                                                                                                                                                                                                                                                                                                                                                                                                                                                                                                                                                                                                                              |                                                                                                                                             |                                                                                                                                                                                                              |                                                                                                                                                                                                                                                                                                                                                                                                                                                                                                                                                                                                                                                                                                                                                                                                                                                                                                                                                                                                                                                                                                                                                                                                                                                                                                                                                                                                                            |                                                                                                                                                                                                                          |                         |            |       |     |                  |       |                  |             |  |     |                  |       |                  |             |  |     |                  |       |                  |                 |  |     |                  |       |                  |  |                         |         |  |     |                  |       |                  |             |  |     |                  |       |                  |             |  |     |                  |       |                  |                 |  |     |                  |       |                  |                                                                                                                                                                                                                                                                                                                                                                                             |
| Women                                         | 60.2 (55.7–64.5)                                                                                                                                                                                                                                                                        |                                                                                                                                                                                                                                                                                                                                                                                                                                                                                                                                                                                                                                                                              |                                                                                                                                             |                                                                                                                                                                                                              |                                                                                                                                                                                                                                                                                                                                                                                                                                                                                                                                                                                                                                                                                                                                                                                                                                                                                                                                                                                                                                                                                                                                                                                                                                                                                                                                                                                                                            |                                                                                                                                                                                                                          |                         |            |       |     |                  |       |                  |             |  |     |                  |       |                  |             |  |     |                  |       |                  |                 |  |     |                  |       |                  |  |                         |         |  |     |                  |       |                  |             |  |     |                  |       |                  |             |  |     |                  |       |                  |                 |  |     |                  |       |                  |                                                                                                                                                                                                                                                                                                                                                                                             |
|                                               | Prevalence (%) (95% CI)                                                                                                                                                                                                                                                                 |                                                                                                                                                                                                                                                                                                                                                                                                                                                                                                                                                                                                                                                                              |                                                                                                                                             |                                                                                                                                                                                                              |                                                                                                                                                                                                                                                                                                                                                                                                                                                                                                                                                                                                                                                                                                                                                                                                                                                                                                                                                                                                                                                                                                                                                                                                                                                                                                                                                                                                                            |                                                                                                                                                                                                                          |                         |            |       |     |                  |       |                  |             |  |     |                  |       |                  |             |  |     |                  |       |                  |                 |  |     |                  |       |                  |  |                         |         |  |     |                  |       |                  |             |  |     |                  |       |                  |             |  |     |                  |       |                  |                 |  |     |                  |       |                  |                                                                                                                                                                                                                                                                                                                                                                                             |
| Overall                                       |                                                                                                                                                                                                                                                                                         |                                                                                                                                                                                                                                                                                                                                                                                                                                                                                                                                                                                                                                                                              |                                                                                                                                             |                                                                                                                                                                                                              |                                                                                                                                                                                                                                                                                                                                                                                                                                                                                                                                                                                                                                                                                                                                                                                                                                                                                                                                                                                                                                                                                                                                                                                                                                                                                                                                                                                                                            |                                                                                                                                                                                                                          |                         |            |       |     |                  |       |                  |             |  |     |                  |       |                  |             |  |     |                  |       |                  |                 |  |     |                  |       |                  |  |                         |         |  |     |                  |       |                  |             |  |     |                  |       |                  |             |  |     |                  |       |                  |                 |  |     |                  |       |                  |                                                                                                                                                                                                                                                                                                                                                                                             |
| Men                                           | 63.5 (60.2–66.6)                                                                                                                                                                                                                                                                        |                                                                                                                                                                                                                                                                                                                                                                                                                                                                                                                                                                                                                                                                              |                                                                                                                                             |                                                                                                                                                                                                              |                                                                                                                                                                                                                                                                                                                                                                                                                                                                                                                                                                                                                                                                                                                                                                                                                                                                                                                                                                                                                                                                                                                                                                                                                                                                                                                                                                                                                            |                                                                                                                                                                                                                          |                         |            |       |     |                  |       |                  |             |  |     |                  |       |                  |             |  |     |                  |       |                  |                 |  |     |                  |       |                  |  |                         |         |  |     |                  |       |                  |             |  |     |                  |       |                  |             |  |     |                  |       |                  |                 |  |     |                  |       |                  |                                                                                                                                                                                                                                                                                                                                                                                             |
| Women                                         | 68.7 (65.6–71.6)                                                                                                                                                                                                                                                                        |                                                                                                                                                                                                                                                                                                                                                                                                                                                                                                                                                                                                                                                                              |                                                                                                                                             |                                                                                                                                                                                                              |                                                                                                                                                                                                                                                                                                                                                                                                                                                                                                                                                                                                                                                                                                                                                                                                                                                                                                                                                                                                                                                                                                                                                                                                                                                                                                                                                                                                                            |                                                                                                                                                                                                                          |                         |            |       |     |                  |       |                  |             |  |     |                  |       |                  |             |  |     |                  |       |                  |                 |  |     |                  |       |                  |  |                         |         |  |     |                  |       |                  |             |  |     |                  |       |                  |             |  |     |                  |       |                  |                 |  |     |                  |       |                  |                                                                                                                                                                                                                                                                                                                                                                                             |
| 20–34 years                                   |                                                                                                                                                                                                                                                                                         |                                                                                                                                                                                                                                                                                                                                                                                                                                                                                                                                                                                                                                                                              |                                                                                                                                             |                                                                                                                                                                                                              |                                                                                                                                                                                                                                                                                                                                                                                                                                                                                                                                                                                                                                                                                                                                                                                                                                                                                                                                                                                                                                                                                                                                                                                                                                                                                                                                                                                                                            |                                                                                                                                                                                                                          |                         |            |       |     |                  |       |                  |             |  |     |                  |       |                  |             |  |     |                  |       |                  |                 |  |     |                  |       |                  |  |                         |         |  |     |                  |       |                  |             |  |     |                  |       |                  |             |  |     |                  |       |                  |                 |  |     |                  |       |                  |                                                                                                                                                                                                                                                                                                                                                                                             |
| Men                                           | 75.8 (67.6–82.5)                                                                                                                                                                                                                                                                        |                                                                                                                                                                                                                                                                                                                                                                                                                                                                                                                                                                                                                                                                              |                                                                                                                                             |                                                                                                                                                                                                              |                                                                                                                                                                                                                                                                                                                                                                                                                                                                                                                                                                                                                                                                                                                                                                                                                                                                                                                                                                                                                                                                                                                                                                                                                                                                                                                                                                                                                            |                                                                                                                                                                                                                          |                         |            |       |     |                  |       |                  |             |  |     |                  |       |                  |             |  |     |                  |       |                  |                 |  |     |                  |       |                  |  |                         |         |  |     |                  |       |                  |             |  |     |                  |       |                  |             |  |     |                  |       |                  |                 |  |     |                  |       |                  |                                                                                                                                                                                                                                                                                                                                                                                             |
| Women                                         | 74.8 (67.5–80.9)                                                                                                                                                                                                                                                                        |                                                                                                                                                                                                                                                                                                                                                                                                                                                                                                                                                                                                                                                                              |                                                                                                                                             |                                                                                                                                                                                                              |                                                                                                                                                                                                                                                                                                                                                                                                                                                                                                                                                                                                                                                                                                                                                                                                                                                                                                                                                                                                                                                                                                                                                                                                                                                                                                                                                                                                                            |                                                                                                                                                                                                                          |                         |            |       |     |                  |       |                  |             |  |     |                  |       |                  |             |  |     |                  |       |                  |                 |  |     |                  |       |                  |  |                         |         |  |     |                  |       |                  |             |  |     |                  |       |                  |             |  |     |                  |       |                  |                 |  |     |                  |       |                  |                                                                                                                                                                                                                                                                                                                                                                                             |
| 35–54 years                                   |                                                                                                                                                                                                                                                                                         |                                                                                                                                                                                                                                                                                                                                                                                                                                                                                                                                                                                                                                                                              |                                                                                                                                             |                                                                                                                                                                                                              |                                                                                                                                                                                                                                                                                                                                                                                                                                                                                                                                                                                                                                                                                                                                                                                                                                                                                                                                                                                                                                                                                                                                                                                                                                                                                                                                                                                                                            |                                                                                                                                                                                                                          |                         |            |       |     |                  |       |                  |             |  |     |                  |       |                  |             |  |     |                  |       |                  |                 |  |     |                  |       |                  |  |                         |         |  |     |                  |       |                  |             |  |     |                  |       |                  |             |  |     |                  |       |                  |                 |  |     |                  |       |                  |                                                                                                                                                                                                                                                                                                                                                                                             |
| Men                                           | 62.9 (57.2–68.2)                                                                                                                                                                                                                                                                        |                                                                                                                                                                                                                                                                                                                                                                                                                                                                                                                                                                                                                                                                              |                                                                                                                                             |                                                                                                                                                                                                              |                                                                                                                                                                                                                                                                                                                                                                                                                                                                                                                                                                                                                                                                                                                                                                                                                                                                                                                                                                                                                                                                                                                                                                                                                                                                                                                                                                                                                            |                                                                                                                                                                                                                          |                         |            |       |     |                  |       |                  |             |  |     |                  |       |                  |             |  |     |                  |       |                  |                 |  |     |                  |       |                  |  |                         |         |  |     |                  |       |                  |             |  |     |                  |       |                  |             |  |     |                  |       |                  |                 |  |     |                  |       |                  |                                                                                                                                                                                                                                                                                                                                                                                             |
| Women                                         | 74.2 (69.8–78.3)                                                                                                                                                                                                                                                                        |                                                                                                                                                                                                                                                                                                                                                                                                                                                                                                                                                                                                                                                                              |                                                                                                                                             |                                                                                                                                                                                                              |                                                                                                                                                                                                                                                                                                                                                                                                                                                                                                                                                                                                                                                                                                                                                                                                                                                                                                                                                                                                                                                                                                                                                                                                                                                                                                                                                                                                                            |                                                                                                                                                                                                                          |                         |            |       |     |                  |       |                  |             |  |     |                  |       |                  |             |  |     |                  |       |                  |                 |  |     |                  |       |                  |  |                         |         |  |     |                  |       |                  |             |  |     |                  |       |                  |             |  |     |                  |       |                  |                 |  |     |                  |       |                  |                                                                                                                                                                                                                                                                                                                                                                                             |
| $\geq 55$ years                               |                                                                                                                                                                                                                                                                                         |                                                                                                                                                                                                                                                                                                                                                                                                                                                                                                                                                                                                                                                                              |                                                                                                                                             |                                                                                                                                                                                                              |                                                                                                                                                                                                                                                                                                                                                                                                                                                                                                                                                                                                                                                                                                                                                                                                                                                                                                                                                                                                                                                                                                                                                                                                                                                                                                                                                                                                                            |                                                                                                                                                                                                                          |                         |            |       |     |                  |       |                  |             |  |     |                  |       |                  |             |  |     |                  |       |                  |                 |  |     |                  |       |                  |  |                         |         |  |     |                  |       |                  |             |  |     |                  |       |                  |             |  |     |                  |       |                  |                 |  |     |                  |       |                  |                                                                                                                                                                                                                                                                                                                                                                                             |
| Men                                           | 55.9 (51.1–60.7)                                                                                                                                                                                                                                                                        |                                                                                                                                                                                                                                                                                                                                                                                                                                                                                                                                                                                                                                                                              |                                                                                                                                             |                                                                                                                                                                                                              |                                                                                                                                                                                                                                                                                                                                                                                                                                                                                                                                                                                                                                                                                                                                                                                                                                                                                                                                                                                                                                                                                                                                                                                                                                                                                                                                                                                                                            |                                                                                                                                                                                                                          |                         |            |       |     |                  |       |                  |             |  |     |                  |       |                  |             |  |     |                  |       |                  |                 |  |     |                  |       |                  |  |                         |         |  |     |                  |       |                  |             |  |     |                  |       |                  |             |  |     |                  |       |                  |                 |  |     |                  |       |                  |                                                                                                                                                                                                                                                                                                                                                                                             |
| Women                                         | 60.5 (55.8–65.1)                                                                                                                                                                                                                                                                        |                                                                                                                                                                                                                                                                                                                                                                                                                                                                                                                                                                                                                                                                              |                                                                                                                                             |                                                                                                                                                                                                              |                                                                                                                                                                                                                                                                                                                                                                                                                                                                                                                                                                                                                                                                                                                                                                                                                                                                                                                                                                                                                                                                                                                                                                                                                                                                                                                                                                                                                            |                                                                                                                                                                                                                          |                         |            |       |     |                  |       |                  |             |  |     |                  |       |                  |             |  |     |                  |       |                  |                 |  |     |                  |       |                  |  |                         |         |  |     |                  |       |                  |             |  |     |                  |       |                  |             |  |     |                  |       |                  |                 |  |     |                  |       |                  |                                                                                                                                                                                                                                                                                                                                                                                             |

| Reference<br>(First author, publication year)                                                   | General<br>(Study design<br>Study name<br>Country of study<br>Time of study<br>No. of waves<br>Follow-up duration<br>(e.g., mean, range)) | Population<br>(Description<br>Inclusion criteria<br># invited<br># baseline<br># follow-up<br>Age at baseline<br>% females<br>Response<br>Lost to follow-up) | Exposure<br>(Description & assessment)                                                                                                                                          | Outcome<br>(Description & assessment)                                                                                          | Results<br>(Description of all topically relevant results)                                                                                                                                                                                                                                                                                                                                                                                                                                                                                                                                                                                                                                                                                                                                                                                                                                                                                                                                                                                                                                                                                                                                                                                                                                                                                                                                                                                                                                                                                                                                                                                                                                                                                                                            | Comments<br>(study quality [overall assessment according to Ilijaz/Shamliyan/SIGN/CASP]<br>Conflict of interest [stated vs. not stated]<br>Funding (public, non-profit, commercial)<br>Strengths (+) and weaknesses (-)) |  |  |                                   |                                |          |                |      |       |        |                  |                                                                                                                     |       |                  |  |                    |  |  |     |                  |  |       |                  |  |                    |  |  |     |                  |  |       |                  |  |                   |  |  |     |                |  |       |               |  |                                                                                                 |  |  |  |                                |  |                |  |  |     |                  |  |       |                  |  |                    |  |  |     |                  |  |       |                  |  |                    |  |  |     |                  |  |       |                  |  |                   |  |  |     |                  |  |       |                  |  |  |
|-------------------------------------------------------------------------------------------------|-------------------------------------------------------------------------------------------------------------------------------------------|--------------------------------------------------------------------------------------------------------------------------------------------------------------|---------------------------------------------------------------------------------------------------------------------------------------------------------------------------------|--------------------------------------------------------------------------------------------------------------------------------|---------------------------------------------------------------------------------------------------------------------------------------------------------------------------------------------------------------------------------------------------------------------------------------------------------------------------------------------------------------------------------------------------------------------------------------------------------------------------------------------------------------------------------------------------------------------------------------------------------------------------------------------------------------------------------------------------------------------------------------------------------------------------------------------------------------------------------------------------------------------------------------------------------------------------------------------------------------------------------------------------------------------------------------------------------------------------------------------------------------------------------------------------------------------------------------------------------------------------------------------------------------------------------------------------------------------------------------------------------------------------------------------------------------------------------------------------------------------------------------------------------------------------------------------------------------------------------------------------------------------------------------------------------------------------------------------------------------------------------------------------------------------------------------|--------------------------------------------------------------------------------------------------------------------------------------------------------------------------------------------------------------------------|--|--|-----------------------------------|--------------------------------|----------|----------------|------|-------|--------|------------------|---------------------------------------------------------------------------------------------------------------------|-------|------------------|--|--------------------|--|--|-----|------------------|--|-------|------------------|--|--------------------|--|--|-----|------------------|--|-------|------------------|--|-------------------|--|--|-----|----------------|--|-------|---------------|--|-------------------------------------------------------------------------------------------------|--|--|--|--------------------------------|--|----------------|--|--|-----|------------------|--|-------|------------------|--|--------------------|--|--|-----|------------------|--|-------|------------------|--|--------------------|--|--|-----|------------------|--|-------|------------------|--|-------------------|--|--|-----|------------------|--|-------|------------------|--|--|
|                                                                                                 |                                                                                                                                           | <b>Response:</b><br>62.5 %<br><b>Lost to follow-up:</b><br>n.a.                                                                                              |                                                                                                                                                                                 |                                                                                                                                | <table><tr><td colspan="3"><b>Table 1: Descriptive statistics for an increase in playing video games</b></td></tr><tr><td></td><td colspan="2"><b>Prevalence (%) (95% CI)</b></td></tr><tr><td colspan="3"><b>Overall</b></td></tr><tr><td>Men</td><td colspan="2">24.1 (21.1–27.3)</td></tr><tr><td>Women</td><td colspan="2">16.0 (13.6–18.6)</td></tr><tr><td colspan="3"><b>20–34 years</b></td></tr><tr><td>Men</td><td colspan="2">50.6 (42.3–58.9)</td></tr><tr><td>Women</td><td colspan="2">29.4 (23.1–36.6)</td></tr><tr><td colspan="3"><b>35–54 years</b></td></tr><tr><td>Men</td><td colspan="2">21.3 (17.5–25.6)</td></tr><tr><td>Women</td><td colspan="2">15.5 (11.8–19.9)</td></tr><tr><td colspan="3"><b>≥ 55 years</b></td></tr><tr><td>Men</td><td colspan="2">7.2 (5.1–10.0)</td></tr><tr><td>Women</td><td colspan="2">7.3 (5.5–9.7)</td></tr></table><br><table><tr><td colspan="3"><b>Table 1: Descriptive statistics for an increase in 2 or 3 types of screen time behaviors</b></td></tr><tr><td></td><td colspan="2"><b>Prevalence (%) (95% CI)</b></td></tr><tr><td colspan="3"><b>Overall</b></td></tr><tr><td>Men</td><td colspan="2">52.7 (49.1–56.2)</td></tr><tr><td>Women</td><td colspan="2">56.7 (53.4–60.0)</td></tr><tr><td colspan="3"><b>20–34 years</b></td></tr><tr><td>Men</td><td colspan="2">63.9 (54.9–72.1)</td></tr><tr><td>Women</td><td colspan="2">67.8 (60.7–74.3)</td></tr><tr><td colspan="3"><b>35–54 years</b></td></tr><tr><td>Men</td><td colspan="2">53.6 (48.2–58.9)</td></tr><tr><td>Women</td><td colspan="2">60.0 (55.0–64.8)</td></tr><tr><td colspan="3"><b>≥ 55 years</b></td></tr><tr><td>Men</td><td colspan="2">43.3 (38.2–48.6)</td></tr><tr><td>Women</td><td colspan="2">46.3 (41.2–51.4)</td></tr></table> | <b>Table 1: Descriptive statistics for an increase in playing video games</b>                                                                                                                                            |  |  |                                   | <b>Prevalence (%) (95% CI)</b> |          | <b>Overall</b> |      |       | Men    | 24.1 (21.1–27.3) |                                                                                                                     | Women | 16.0 (13.6–18.6) |  | <b>20–34 years</b> |  |  | Men | 50.6 (42.3–58.9) |  | Women | 29.4 (23.1–36.6) |  | <b>35–54 years</b> |  |  | Men | 21.3 (17.5–25.6) |  | Women | 15.5 (11.8–19.9) |  | <b>≥ 55 years</b> |  |  | Men | 7.2 (5.1–10.0) |  | Women | 7.3 (5.5–9.7) |  | <b>Table 1: Descriptive statistics for an increase in 2 or 3 types of screen time behaviors</b> |  |  |  | <b>Prevalence (%) (95% CI)</b> |  | <b>Overall</b> |  |  | Men | 52.7 (49.1–56.2) |  | Women | 56.7 (53.4–60.0) |  | <b>20–34 years</b> |  |  | Men | 63.9 (54.9–72.1) |  | Women | 67.8 (60.7–74.3) |  | <b>35–54 years</b> |  |  | Men | 53.6 (48.2–58.9) |  | Women | 60.0 (55.0–64.8) |  | <b>≥ 55 years</b> |  |  | Men | 43.3 (38.2–48.6) |  | Women | 46.3 (41.2–51.4) |  |  |
| <b>Table 1: Descriptive statistics for an increase in playing video games</b>                   |                                                                                                                                           |                                                                                                                                                              |                                                                                                                                                                                 |                                                                                                                                |                                                                                                                                                                                                                                                                                                                                                                                                                                                                                                                                                                                                                                                                                                                                                                                                                                                                                                                                                                                                                                                                                                                                                                                                                                                                                                                                                                                                                                                                                                                                                                                                                                                                                                                                                                                       |                                                                                                                                                                                                                          |  |  |                                   |                                |          |                |      |       |        |                  |                                                                                                                     |       |                  |  |                    |  |  |     |                  |  |       |                  |  |                    |  |  |     |                  |  |       |                  |  |                   |  |  |     |                |  |       |               |  |                                                                                                 |  |  |  |                                |  |                |  |  |     |                  |  |       |                  |  |                    |  |  |     |                  |  |       |                  |  |                    |  |  |     |                  |  |       |                  |  |                   |  |  |     |                  |  |       |                  |  |  |
|                                                                                                 | <b>Prevalence (%) (95% CI)</b>                                                                                                            |                                                                                                                                                              |                                                                                                                                                                                 |                                                                                                                                |                                                                                                                                                                                                                                                                                                                                                                                                                                                                                                                                                                                                                                                                                                                                                                                                                                                                                                                                                                                                                                                                                                                                                                                                                                                                                                                                                                                                                                                                                                                                                                                                                                                                                                                                                                                       |                                                                                                                                                                                                                          |  |  |                                   |                                |          |                |      |       |        |                  |                                                                                                                     |       |                  |  |                    |  |  |     |                  |  |       |                  |  |                    |  |  |     |                  |  |       |                  |  |                   |  |  |     |                |  |       |               |  |                                                                                                 |  |  |  |                                |  |                |  |  |     |                  |  |       |                  |  |                    |  |  |     |                  |  |       |                  |  |                    |  |  |     |                  |  |       |                  |  |                   |  |  |     |                  |  |       |                  |  |  |
| <b>Overall</b>                                                                                  |                                                                                                                                           |                                                                                                                                                              |                                                                                                                                                                                 |                                                                                                                                |                                                                                                                                                                                                                                                                                                                                                                                                                                                                                                                                                                                                                                                                                                                                                                                                                                                                                                                                                                                                                                                                                                                                                                                                                                                                                                                                                                                                                                                                                                                                                                                                                                                                                                                                                                                       |                                                                                                                                                                                                                          |  |  |                                   |                                |          |                |      |       |        |                  |                                                                                                                     |       |                  |  |                    |  |  |     |                  |  |       |                  |  |                    |  |  |     |                  |  |       |                  |  |                   |  |  |     |                |  |       |               |  |                                                                                                 |  |  |  |                                |  |                |  |  |     |                  |  |       |                  |  |                    |  |  |     |                  |  |       |                  |  |                    |  |  |     |                  |  |       |                  |  |                   |  |  |     |                  |  |       |                  |  |  |
| Men                                                                                             | 24.1 (21.1–27.3)                                                                                                                          |                                                                                                                                                              |                                                                                                                                                                                 |                                                                                                                                |                                                                                                                                                                                                                                                                                                                                                                                                                                                                                                                                                                                                                                                                                                                                                                                                                                                                                                                                                                                                                                                                                                                                                                                                                                                                                                                                                                                                                                                                                                                                                                                                                                                                                                                                                                                       |                                                                                                                                                                                                                          |  |  |                                   |                                |          |                |      |       |        |                  |                                                                                                                     |       |                  |  |                    |  |  |     |                  |  |       |                  |  |                    |  |  |     |                  |  |       |                  |  |                   |  |  |     |                |  |       |               |  |                                                                                                 |  |  |  |                                |  |                |  |  |     |                  |  |       |                  |  |                    |  |  |     |                  |  |       |                  |  |                    |  |  |     |                  |  |       |                  |  |                   |  |  |     |                  |  |       |                  |  |  |
| Women                                                                                           | 16.0 (13.6–18.6)                                                                                                                          |                                                                                                                                                              |                                                                                                                                                                                 |                                                                                                                                |                                                                                                                                                                                                                                                                                                                                                                                                                                                                                                                                                                                                                                                                                                                                                                                                                                                                                                                                                                                                                                                                                                                                                                                                                                                                                                                                                                                                                                                                                                                                                                                                                                                                                                                                                                                       |                                                                                                                                                                                                                          |  |  |                                   |                                |          |                |      |       |        |                  |                                                                                                                     |       |                  |  |                    |  |  |     |                  |  |       |                  |  |                    |  |  |     |                  |  |       |                  |  |                   |  |  |     |                |  |       |               |  |                                                                                                 |  |  |  |                                |  |                |  |  |     |                  |  |       |                  |  |                    |  |  |     |                  |  |       |                  |  |                    |  |  |     |                  |  |       |                  |  |                   |  |  |     |                  |  |       |                  |  |  |
| <b>20–34 years</b>                                                                              |                                                                                                                                           |                                                                                                                                                              |                                                                                                                                                                                 |                                                                                                                                |                                                                                                                                                                                                                                                                                                                                                                                                                                                                                                                                                                                                                                                                                                                                                                                                                                                                                                                                                                                                                                                                                                                                                                                                                                                                                                                                                                                                                                                                                                                                                                                                                                                                                                                                                                                       |                                                                                                                                                                                                                          |  |  |                                   |                                |          |                |      |       |        |                  |                                                                                                                     |       |                  |  |                    |  |  |     |                  |  |       |                  |  |                    |  |  |     |                  |  |       |                  |  |                   |  |  |     |                |  |       |               |  |                                                                                                 |  |  |  |                                |  |                |  |  |     |                  |  |       |                  |  |                    |  |  |     |                  |  |       |                  |  |                    |  |  |     |                  |  |       |                  |  |                   |  |  |     |                  |  |       |                  |  |  |
| Men                                                                                             | 50.6 (42.3–58.9)                                                                                                                          |                                                                                                                                                              |                                                                                                                                                                                 |                                                                                                                                |                                                                                                                                                                                                                                                                                                                                                                                                                                                                                                                                                                                                                                                                                                                                                                                                                                                                                                                                                                                                                                                                                                                                                                                                                                                                                                                                                                                                                                                                                                                                                                                                                                                                                                                                                                                       |                                                                                                                                                                                                                          |  |  |                                   |                                |          |                |      |       |        |                  |                                                                                                                     |       |                  |  |                    |  |  |     |                  |  |       |                  |  |                    |  |  |     |                  |  |       |                  |  |                   |  |  |     |                |  |       |               |  |                                                                                                 |  |  |  |                                |  |                |  |  |     |                  |  |       |                  |  |                    |  |  |     |                  |  |       |                  |  |                    |  |  |     |                  |  |       |                  |  |                   |  |  |     |                  |  |       |                  |  |  |
| Women                                                                                           | 29.4 (23.1–36.6)                                                                                                                          |                                                                                                                                                              |                                                                                                                                                                                 |                                                                                                                                |                                                                                                                                                                                                                                                                                                                                                                                                                                                                                                                                                                                                                                                                                                                                                                                                                                                                                                                                                                                                                                                                                                                                                                                                                                                                                                                                                                                                                                                                                                                                                                                                                                                                                                                                                                                       |                                                                                                                                                                                                                          |  |  |                                   |                                |          |                |      |       |        |                  |                                                                                                                     |       |                  |  |                    |  |  |     |                  |  |       |                  |  |                    |  |  |     |                  |  |       |                  |  |                   |  |  |     |                |  |       |               |  |                                                                                                 |  |  |  |                                |  |                |  |  |     |                  |  |       |                  |  |                    |  |  |     |                  |  |       |                  |  |                    |  |  |     |                  |  |       |                  |  |                   |  |  |     |                  |  |       |                  |  |  |
| <b>35–54 years</b>                                                                              |                                                                                                                                           |                                                                                                                                                              |                                                                                                                                                                                 |                                                                                                                                |                                                                                                                                                                                                                                                                                                                                                                                                                                                                                                                                                                                                                                                                                                                                                                                                                                                                                                                                                                                                                                                                                                                                                                                                                                                                                                                                                                                                                                                                                                                                                                                                                                                                                                                                                                                       |                                                                                                                                                                                                                          |  |  |                                   |                                |          |                |      |       |        |                  |                                                                                                                     |       |                  |  |                    |  |  |     |                  |  |       |                  |  |                    |  |  |     |                  |  |       |                  |  |                   |  |  |     |                |  |       |               |  |                                                                                                 |  |  |  |                                |  |                |  |  |     |                  |  |       |                  |  |                    |  |  |     |                  |  |       |                  |  |                    |  |  |     |                  |  |       |                  |  |                   |  |  |     |                  |  |       |                  |  |  |
| Men                                                                                             | 21.3 (17.5–25.6)                                                                                                                          |                                                                                                                                                              |                                                                                                                                                                                 |                                                                                                                                |                                                                                                                                                                                                                                                                                                                                                                                                                                                                                                                                                                                                                                                                                                                                                                                                                                                                                                                                                                                                                                                                                                                                                                                                                                                                                                                                                                                                                                                                                                                                                                                                                                                                                                                                                                                       |                                                                                                                                                                                                                          |  |  |                                   |                                |          |                |      |       |        |                  |                                                                                                                     |       |                  |  |                    |  |  |     |                  |  |       |                  |  |                    |  |  |     |                  |  |       |                  |  |                   |  |  |     |                |  |       |               |  |                                                                                                 |  |  |  |                                |  |                |  |  |     |                  |  |       |                  |  |                    |  |  |     |                  |  |       |                  |  |                    |  |  |     |                  |  |       |                  |  |                   |  |  |     |                  |  |       |                  |  |  |
| Women                                                                                           | 15.5 (11.8–19.9)                                                                                                                          |                                                                                                                                                              |                                                                                                                                                                                 |                                                                                                                                |                                                                                                                                                                                                                                                                                                                                                                                                                                                                                                                                                                                                                                                                                                                                                                                                                                                                                                                                                                                                                                                                                                                                                                                                                                                                                                                                                                                                                                                                                                                                                                                                                                                                                                                                                                                       |                                                                                                                                                                                                                          |  |  |                                   |                                |          |                |      |       |        |                  |                                                                                                                     |       |                  |  |                    |  |  |     |                  |  |       |                  |  |                    |  |  |     |                  |  |       |                  |  |                   |  |  |     |                |  |       |               |  |                                                                                                 |  |  |  |                                |  |                |  |  |     |                  |  |       |                  |  |                    |  |  |     |                  |  |       |                  |  |                    |  |  |     |                  |  |       |                  |  |                   |  |  |     |                  |  |       |                  |  |  |
| <b>≥ 55 years</b>                                                                               |                                                                                                                                           |                                                                                                                                                              |                                                                                                                                                                                 |                                                                                                                                |                                                                                                                                                                                                                                                                                                                                                                                                                                                                                                                                                                                                                                                                                                                                                                                                                                                                                                                                                                                                                                                                                                                                                                                                                                                                                                                                                                                                                                                                                                                                                                                                                                                                                                                                                                                       |                                                                                                                                                                                                                          |  |  |                                   |                                |          |                |      |       |        |                  |                                                                                                                     |       |                  |  |                    |  |  |     |                  |  |       |                  |  |                    |  |  |     |                  |  |       |                  |  |                   |  |  |     |                |  |       |               |  |                                                                                                 |  |  |  |                                |  |                |  |  |     |                  |  |       |                  |  |                    |  |  |     |                  |  |       |                  |  |                    |  |  |     |                  |  |       |                  |  |                   |  |  |     |                  |  |       |                  |  |  |
| Men                                                                                             | 7.2 (5.1–10.0)                                                                                                                            |                                                                                                                                                              |                                                                                                                                                                                 |                                                                                                                                |                                                                                                                                                                                                                                                                                                                                                                                                                                                                                                                                                                                                                                                                                                                                                                                                                                                                                                                                                                                                                                                                                                                                                                                                                                                                                                                                                                                                                                                                                                                                                                                                                                                                                                                                                                                       |                                                                                                                                                                                                                          |  |  |                                   |                                |          |                |      |       |        |                  |                                                                                                                     |       |                  |  |                    |  |  |     |                  |  |       |                  |  |                    |  |  |     |                  |  |       |                  |  |                   |  |  |     |                |  |       |               |  |                                                                                                 |  |  |  |                                |  |                |  |  |     |                  |  |       |                  |  |                    |  |  |     |                  |  |       |                  |  |                    |  |  |     |                  |  |       |                  |  |                   |  |  |     |                  |  |       |                  |  |  |
| Women                                                                                           | 7.3 (5.5–9.7)                                                                                                                             |                                                                                                                                                              |                                                                                                                                                                                 |                                                                                                                                |                                                                                                                                                                                                                                                                                                                                                                                                                                                                                                                                                                                                                                                                                                                                                                                                                                                                                                                                                                                                                                                                                                                                                                                                                                                                                                                                                                                                                                                                                                                                                                                                                                                                                                                                                                                       |                                                                                                                                                                                                                          |  |  |                                   |                                |          |                |      |       |        |                  |                                                                                                                     |       |                  |  |                    |  |  |     |                  |  |       |                  |  |                    |  |  |     |                  |  |       |                  |  |                   |  |  |     |                |  |       |               |  |                                                                                                 |  |  |  |                                |  |                |  |  |     |                  |  |       |                  |  |                    |  |  |     |                  |  |       |                  |  |                    |  |  |     |                  |  |       |                  |  |                   |  |  |     |                  |  |       |                  |  |  |
| <b>Table 1: Descriptive statistics for an increase in 2 or 3 types of screen time behaviors</b> |                                                                                                                                           |                                                                                                                                                              |                                                                                                                                                                                 |                                                                                                                                |                                                                                                                                                                                                                                                                                                                                                                                                                                                                                                                                                                                                                                                                                                                                                                                                                                                                                                                                                                                                                                                                                                                                                                                                                                                                                                                                                                                                                                                                                                                                                                                                                                                                                                                                                                                       |                                                                                                                                                                                                                          |  |  |                                   |                                |          |                |      |       |        |                  |                                                                                                                     |       |                  |  |                    |  |  |     |                  |  |       |                  |  |                    |  |  |     |                  |  |       |                  |  |                   |  |  |     |                |  |       |               |  |                                                                                                 |  |  |  |                                |  |                |  |  |     |                  |  |       |                  |  |                    |  |  |     |                  |  |       |                  |  |                    |  |  |     |                  |  |       |                  |  |                   |  |  |     |                  |  |       |                  |  |  |
|                                                                                                 | <b>Prevalence (%) (95% CI)</b>                                                                                                            |                                                                                                                                                              |                                                                                                                                                                                 |                                                                                                                                |                                                                                                                                                                                                                                                                                                                                                                                                                                                                                                                                                                                                                                                                                                                                                                                                                                                                                                                                                                                                                                                                                                                                                                                                                                                                                                                                                                                                                                                                                                                                                                                                                                                                                                                                                                                       |                                                                                                                                                                                                                          |  |  |                                   |                                |          |                |      |       |        |                  |                                                                                                                     |       |                  |  |                    |  |  |     |                  |  |       |                  |  |                    |  |  |     |                  |  |       |                  |  |                   |  |  |     |                |  |       |               |  |                                                                                                 |  |  |  |                                |  |                |  |  |     |                  |  |       |                  |  |                    |  |  |     |                  |  |       |                  |  |                    |  |  |     |                  |  |       |                  |  |                   |  |  |     |                  |  |       |                  |  |  |
| <b>Overall</b>                                                                                  |                                                                                                                                           |                                                                                                                                                              |                                                                                                                                                                                 |                                                                                                                                |                                                                                                                                                                                                                                                                                                                                                                                                                                                                                                                                                                                                                                                                                                                                                                                                                                                                                                                                                                                                                                                                                                                                                                                                                                                                                                                                                                                                                                                                                                                                                                                                                                                                                                                                                                                       |                                                                                                                                                                                                                          |  |  |                                   |                                |          |                |      |       |        |                  |                                                                                                                     |       |                  |  |                    |  |  |     |                  |  |       |                  |  |                    |  |  |     |                  |  |       |                  |  |                   |  |  |     |                |  |       |               |  |                                                                                                 |  |  |  |                                |  |                |  |  |     |                  |  |       |                  |  |                    |  |  |     |                  |  |       |                  |  |                    |  |  |     |                  |  |       |                  |  |                   |  |  |     |                  |  |       |                  |  |  |
| Men                                                                                             | 52.7 (49.1–56.2)                                                                                                                          |                                                                                                                                                              |                                                                                                                                                                                 |                                                                                                                                |                                                                                                                                                                                                                                                                                                                                                                                                                                                                                                                                                                                                                                                                                                                                                                                                                                                                                                                                                                                                                                                                                                                                                                                                                                                                                                                                                                                                                                                                                                                                                                                                                                                                                                                                                                                       |                                                                                                                                                                                                                          |  |  |                                   |                                |          |                |      |       |        |                  |                                                                                                                     |       |                  |  |                    |  |  |     |                  |  |       |                  |  |                    |  |  |     |                  |  |       |                  |  |                   |  |  |     |                |  |       |               |  |                                                                                                 |  |  |  |                                |  |                |  |  |     |                  |  |       |                  |  |                    |  |  |     |                  |  |       |                  |  |                    |  |  |     |                  |  |       |                  |  |                   |  |  |     |                  |  |       |                  |  |  |
| Women                                                                                           | 56.7 (53.4–60.0)                                                                                                                          |                                                                                                                                                              |                                                                                                                                                                                 |                                                                                                                                |                                                                                                                                                                                                                                                                                                                                                                                                                                                                                                                                                                                                                                                                                                                                                                                                                                                                                                                                                                                                                                                                                                                                                                                                                                                                                                                                                                                                                                                                                                                                                                                                                                                                                                                                                                                       |                                                                                                                                                                                                                          |  |  |                                   |                                |          |                |      |       |        |                  |                                                                                                                     |       |                  |  |                    |  |  |     |                  |  |       |                  |  |                    |  |  |     |                  |  |       |                  |  |                   |  |  |     |                |  |       |               |  |                                                                                                 |  |  |  |                                |  |                |  |  |     |                  |  |       |                  |  |                    |  |  |     |                  |  |       |                  |  |                    |  |  |     |                  |  |       |                  |  |                   |  |  |     |                  |  |       |                  |  |  |
| <b>20–34 years</b>                                                                              |                                                                                                                                           |                                                                                                                                                              |                                                                                                                                                                                 |                                                                                                                                |                                                                                                                                                                                                                                                                                                                                                                                                                                                                                                                                                                                                                                                                                                                                                                                                                                                                                                                                                                                                                                                                                                                                                                                                                                                                                                                                                                                                                                                                                                                                                                                                                                                                                                                                                                                       |                                                                                                                                                                                                                          |  |  |                                   |                                |          |                |      |       |        |                  |                                                                                                                     |       |                  |  |                    |  |  |     |                  |  |       |                  |  |                    |  |  |     |                  |  |       |                  |  |                   |  |  |     |                |  |       |               |  |                                                                                                 |  |  |  |                                |  |                |  |  |     |                  |  |       |                  |  |                    |  |  |     |                  |  |       |                  |  |                    |  |  |     |                  |  |       |                  |  |                   |  |  |     |                  |  |       |                  |  |  |
| Men                                                                                             | 63.9 (54.9–72.1)                                                                                                                          |                                                                                                                                                              |                                                                                                                                                                                 |                                                                                                                                |                                                                                                                                                                                                                                                                                                                                                                                                                                                                                                                                                                                                                                                                                                                                                                                                                                                                                                                                                                                                                                                                                                                                                                                                                                                                                                                                                                                                                                                                                                                                                                                                                                                                                                                                                                                       |                                                                                                                                                                                                                          |  |  |                                   |                                |          |                |      |       |        |                  |                                                                                                                     |       |                  |  |                    |  |  |     |                  |  |       |                  |  |                    |  |  |     |                  |  |       |                  |  |                   |  |  |     |                |  |       |               |  |                                                                                                 |  |  |  |                                |  |                |  |  |     |                  |  |       |                  |  |                    |  |  |     |                  |  |       |                  |  |                    |  |  |     |                  |  |       |                  |  |                   |  |  |     |                  |  |       |                  |  |  |
| Women                                                                                           | 67.8 (60.7–74.3)                                                                                                                          |                                                                                                                                                              |                                                                                                                                                                                 |                                                                                                                                |                                                                                                                                                                                                                                                                                                                                                                                                                                                                                                                                                                                                                                                                                                                                                                                                                                                                                                                                                                                                                                                                                                                                                                                                                                                                                                                                                                                                                                                                                                                                                                                                                                                                                                                                                                                       |                                                                                                                                                                                                                          |  |  |                                   |                                |          |                |      |       |        |                  |                                                                                                                     |       |                  |  |                    |  |  |     |                  |  |       |                  |  |                    |  |  |     |                  |  |       |                  |  |                   |  |  |     |                |  |       |               |  |                                                                                                 |  |  |  |                                |  |                |  |  |     |                  |  |       |                  |  |                    |  |  |     |                  |  |       |                  |  |                    |  |  |     |                  |  |       |                  |  |                   |  |  |     |                  |  |       |                  |  |  |
| <b>35–54 years</b>                                                                              |                                                                                                                                           |                                                                                                                                                              |                                                                                                                                                                                 |                                                                                                                                |                                                                                                                                                                                                                                                                                                                                                                                                                                                                                                                                                                                                                                                                                                                                                                                                                                                                                                                                                                                                                                                                                                                                                                                                                                                                                                                                                                                                                                                                                                                                                                                                                                                                                                                                                                                       |                                                                                                                                                                                                                          |  |  |                                   |                                |          |                |      |       |        |                  |                                                                                                                     |       |                  |  |                    |  |  |     |                  |  |       |                  |  |                    |  |  |     |                  |  |       |                  |  |                   |  |  |     |                |  |       |               |  |                                                                                                 |  |  |  |                                |  |                |  |  |     |                  |  |       |                  |  |                    |  |  |     |                  |  |       |                  |  |                    |  |  |     |                  |  |       |                  |  |                   |  |  |     |                  |  |       |                  |  |  |
| Men                                                                                             | 53.6 (48.2–58.9)                                                                                                                          |                                                                                                                                                              |                                                                                                                                                                                 |                                                                                                                                |                                                                                                                                                                                                                                                                                                                                                                                                                                                                                                                                                                                                                                                                                                                                                                                                                                                                                                                                                                                                                                                                                                                                                                                                                                                                                                                                                                                                                                                                                                                                                                                                                                                                                                                                                                                       |                                                                                                                                                                                                                          |  |  |                                   |                                |          |                |      |       |        |                  |                                                                                                                     |       |                  |  |                    |  |  |     |                  |  |       |                  |  |                    |  |  |     |                  |  |       |                  |  |                   |  |  |     |                |  |       |               |  |                                                                                                 |  |  |  |                                |  |                |  |  |     |                  |  |       |                  |  |                    |  |  |     |                  |  |       |                  |  |                    |  |  |     |                  |  |       |                  |  |                   |  |  |     |                  |  |       |                  |  |  |
| Women                                                                                           | 60.0 (55.0–64.8)                                                                                                                          |                                                                                                                                                              |                                                                                                                                                                                 |                                                                                                                                |                                                                                                                                                                                                                                                                                                                                                                                                                                                                                                                                                                                                                                                                                                                                                                                                                                                                                                                                                                                                                                                                                                                                                                                                                                                                                                                                                                                                                                                                                                                                                                                                                                                                                                                                                                                       |                                                                                                                                                                                                                          |  |  |                                   |                                |          |                |      |       |        |                  |                                                                                                                     |       |                  |  |                    |  |  |     |                  |  |       |                  |  |                    |  |  |     |                  |  |       |                  |  |                   |  |  |     |                |  |       |               |  |                                                                                                 |  |  |  |                                |  |                |  |  |     |                  |  |       |                  |  |                    |  |  |     |                  |  |       |                  |  |                    |  |  |     |                  |  |       |                  |  |                   |  |  |     |                  |  |       |                  |  |  |
| <b>≥ 55 years</b>                                                                               |                                                                                                                                           |                                                                                                                                                              |                                                                                                                                                                                 |                                                                                                                                |                                                                                                                                                                                                                                                                                                                                                                                                                                                                                                                                                                                                                                                                                                                                                                                                                                                                                                                                                                                                                                                                                                                                                                                                                                                                                                                                                                                                                                                                                                                                                                                                                                                                                                                                                                                       |                                                                                                                                                                                                                          |  |  |                                   |                                |          |                |      |       |        |                  |                                                                                                                     |       |                  |  |                    |  |  |     |                  |  |       |                  |  |                    |  |  |     |                  |  |       |                  |  |                   |  |  |     |                |  |       |               |  |                                                                                                 |  |  |  |                                |  |                |  |  |     |                  |  |       |                  |  |                    |  |  |     |                  |  |       |                  |  |                    |  |  |     |                  |  |       |                  |  |                   |  |  |     |                  |  |       |                  |  |  |
| Men                                                                                             | 43.3 (38.2–48.6)                                                                                                                          |                                                                                                                                                              |                                                                                                                                                                                 |                                                                                                                                |                                                                                                                                                                                                                                                                                                                                                                                                                                                                                                                                                                                                                                                                                                                                                                                                                                                                                                                                                                                                                                                                                                                                                                                                                                                                                                                                                                                                                                                                                                                                                                                                                                                                                                                                                                                       |                                                                                                                                                                                                                          |  |  |                                   |                                |          |                |      |       |        |                  |                                                                                                                     |       |                  |  |                    |  |  |     |                  |  |       |                  |  |                    |  |  |     |                  |  |       |                  |  |                   |  |  |     |                |  |       |               |  |                                                                                                 |  |  |  |                                |  |                |  |  |     |                  |  |       |                  |  |                    |  |  |     |                  |  |       |                  |  |                    |  |  |     |                  |  |       |                  |  |                   |  |  |     |                  |  |       |                  |  |  |
| Women                                                                                           | 46.3 (41.2–51.4)                                                                                                                          |                                                                                                                                                              |                                                                                                                                                                                 |                                                                                                                                |                                                                                                                                                                                                                                                                                                                                                                                                                                                                                                                                                                                                                                                                                                                                                                                                                                                                                                                                                                                                                                                                                                                                                                                                                                                                                                                                                                                                                                                                                                                                                                                                                                                                                                                                                                                       |                                                                                                                                                                                                                          |  |  |                                   |                                |          |                |      |       |        |                  |                                                                                                                     |       |                  |  |                    |  |  |     |                  |  |       |                  |  |                    |  |  |     |                  |  |       |                  |  |                   |  |  |     |                |  |       |               |  |                                                                                                 |  |  |  |                                |  |                |  |  |     |                  |  |       |                  |  |                    |  |  |     |                  |  |       |                  |  |                    |  |  |     |                  |  |       |                  |  |                   |  |  |     |                  |  |       |                  |  |  |
| Crochemore-Silva et al., 2020                                                                   | <b>Study design:</b><br>Cross-sectional study<br><b>Study name:</b><br>n.a.<br><b>Country of study:</b>                                   | <b>Description:</b><br>Adults<br><b>Inclusion criteria:</b><br>Residents of Bagé's urban area aged ≥ 18 years                                                | <b>Social distancing</b> (public calamity had been declared (municipal decree 050/2020) in the municipality since March 19, 2020, with the adoption of strict social distancing | <b>Leisure-time physical activity:</b><br>1 item from an adapted version of the International Physical Activity Questionnaire: | <table><tr><td colspan="3"><b>Figure 3 (A) and text: Percentage of those engaging in physical activities</b></td></tr><tr><td><b>Level of social distancing</b></td><td><b>Prevalence (%)</b></td><td><b>p</b></td></tr><tr><td>Very little</td><td>~ 20</td><td rowspan="2">0.023</td></tr><tr><td>Little</td><td>n.r. (~ 21*)</td></tr></table>                                                                                                                                                                                                                                                                                                                                                                                                                                                                                                                                                                                                                                                                                                                                                                                                                                                                                                                                                                                                                                                                                                                                                                                                                                                                                                                                                                                                                                     | <b>Figure 3 (A) and text: Percentage of those engaging in physical activities</b>                                                                                                                                        |  |  | <b>Level of social distancing</b> | <b>Prevalence (%)</b>          | <b>p</b> | Very little    | ~ 20 | 0.023 | Little | n.r. (~ 21*)     | <b>Overall study quality:</b><br>High risk<br><b>Conflict of interest:</b><br>Unclear<br><b>Funding:</b><br>Unclear |       |                  |  |                    |  |  |     |                  |  |       |                  |  |                    |  |  |     |                  |  |       |                  |  |                   |  |  |     |                |  |       |               |  |                                                                                                 |  |  |  |                                |  |                |  |  |     |                  |  |       |                  |  |                    |  |  |     |                  |  |       |                  |  |                    |  |  |     |                  |  |       |                  |  |                   |  |  |     |                  |  |       |                  |  |  |
| <b>Figure 3 (A) and text: Percentage of those engaging in physical activities</b>               |                                                                                                                                           |                                                                                                                                                              |                                                                                                                                                                                 |                                                                                                                                |                                                                                                                                                                                                                                                                                                                                                                                                                                                                                                                                                                                                                                                                                                                                                                                                                                                                                                                                                                                                                                                                                                                                                                                                                                                                                                                                                                                                                                                                                                                                                                                                                                                                                                                                                                                       |                                                                                                                                                                                                                          |  |  |                                   |                                |          |                |      |       |        |                  |                                                                                                                     |       |                  |  |                    |  |  |     |                  |  |       |                  |  |                    |  |  |     |                  |  |       |                  |  |                   |  |  |     |                |  |       |               |  |                                                                                                 |  |  |  |                                |  |                |  |  |     |                  |  |       |                  |  |                    |  |  |     |                  |  |       |                  |  |                    |  |  |     |                  |  |       |                  |  |                   |  |  |     |                  |  |       |                  |  |  |
| <b>Level of social distancing</b>                                                               | <b>Prevalence (%)</b>                                                                                                                     | <b>p</b>                                                                                                                                                     |                                                                                                                                                                                 |                                                                                                                                |                                                                                                                                                                                                                                                                                                                                                                                                                                                                                                                                                                                                                                                                                                                                                                                                                                                                                                                                                                                                                                                                                                                                                                                                                                                                                                                                                                                                                                                                                                                                                                                                                                                                                                                                                                                       |                                                                                                                                                                                                                          |  |  |                                   |                                |          |                |      |       |        |                  |                                                                                                                     |       |                  |  |                    |  |  |     |                  |  |       |                  |  |                    |  |  |     |                  |  |       |                  |  |                   |  |  |     |                |  |       |               |  |                                                                                                 |  |  |  |                                |  |                |  |  |     |                  |  |       |                  |  |                    |  |  |     |                  |  |       |                  |  |                    |  |  |     |                  |  |       |                  |  |                   |  |  |     |                  |  |       |                  |  |  |
| Very little                                                                                     | ~ 20                                                                                                                                      | 0.023                                                                                                                                                        |                                                                                                                                                                                 |                                                                                                                                |                                                                                                                                                                                                                                                                                                                                                                                                                                                                                                                                                                                                                                                                                                                                                                                                                                                                                                                                                                                                                                                                                                                                                                                                                                                                                                                                                                                                                                                                                                                                                                                                                                                                                                                                                                                       |                                                                                                                                                                                                                          |  |  |                                   |                                |          |                |      |       |        |                  |                                                                                                                     |       |                  |  |                    |  |  |     |                  |  |       |                  |  |                    |  |  |     |                  |  |       |                  |  |                   |  |  |     |                |  |       |               |  |                                                                                                 |  |  |  |                                |  |                |  |  |     |                  |  |       |                  |  |                    |  |  |     |                  |  |       |                  |  |                    |  |  |     |                  |  |       |                  |  |                   |  |  |     |                  |  |       |                  |  |  |
| Little                                                                                          | n.r. (~ 21*)                                                                                                                              |                                                                                                                                                              |                                                                                                                                                                                 |                                                                                                                                |                                                                                                                                                                                                                                                                                                                                                                                                                                                                                                                                                                                                                                                                                                                                                                                                                                                                                                                                                                                                                                                                                                                                                                                                                                                                                                                                                                                                                                                                                                                                                                                                                                                                                                                                                                                       |                                                                                                                                                                                                                          |  |  |                                   |                                |          |                |      |       |        |                  |                                                                                                                     |       |                  |  |                    |  |  |     |                  |  |       |                  |  |                    |  |  |     |                  |  |       |                  |  |                   |  |  |     |                |  |       |               |  |                                                                                                 |  |  |  |                                |  |                |  |  |     |                  |  |       |                  |  |                    |  |  |     |                  |  |       |                  |  |                    |  |  |     |                  |  |       |                  |  |                   |  |  |     |                  |  |       |                  |  |  |

| Reference<br>(First author, publication year) | General<br>(Study design<br>Study name<br>Country of study<br>Time of study<br>No. of waves<br>Follow-up duration<br>(e.g., mean, range)) | Population<br>(Description<br>Inclusion criteria<br># invited<br># baseline<br># follow-up<br>Age at baseline<br>% females<br>Response<br>Lost to follow-up)                                                                                    | Exposure<br>(Description & assessment)                                                                                                                                                                                                                                                                                                                                                                                                                                                                                                                                                                                                                                                                                                                                                                                                                                                                                                                                                                                  | Outcome<br>(Description & assessment)                                                                                         | Results<br>(Description of all topically relevant results)                                                                                                                                                                                                                                                                                                                                                                                                                                                                                                                                                                                                                                                                                                                                                |         |      | Comments<br>(study quality [overall assessment according to Iljaz/Shamliyan/SIGN/CASP]<br>Conflict of interest [stated vs. not stated]<br>Funding (public, non-profit, commercial)<br>Strengths (+) and weaknesses (-)) |                           |                          |                    |      |                  |                |   |                                                                                                          |      |       |                                     |              |                       |              |                       |      |                                  |      |                                                                                                                                                                                                                                                                                                                                                                                                                                                                                                                                                          |
|-----------------------------------------------|-------------------------------------------------------------------------------------------------------------------------------------------|-------------------------------------------------------------------------------------------------------------------------------------------------------------------------------------------------------------------------------------------------|-------------------------------------------------------------------------------------------------------------------------------------------------------------------------------------------------------------------------------------------------------------------------------------------------------------------------------------------------------------------------------------------------------------------------------------------------------------------------------------------------------------------------------------------------------------------------------------------------------------------------------------------------------------------------------------------------------------------------------------------------------------------------------------------------------------------------------------------------------------------------------------------------------------------------------------------------------------------------------------------------------------------------|-------------------------------------------------------------------------------------------------------------------------------|-----------------------------------------------------------------------------------------------------------------------------------------------------------------------------------------------------------------------------------------------------------------------------------------------------------------------------------------------------------------------------------------------------------------------------------------------------------------------------------------------------------------------------------------------------------------------------------------------------------------------------------------------------------------------------------------------------------------------------------------------------------------------------------------------------------|---------|------|-------------------------------------------------------------------------------------------------------------------------------------------------------------------------------------------------------------------------|---------------------------|--------------------------|--------------------|------|------------------|----------------|---|----------------------------------------------------------------------------------------------------------|------|-------|-------------------------------------|--------------|-----------------------|--------------|-----------------------|------|----------------------------------|------|----------------------------------------------------------------------------------------------------------------------------------------------------------------------------------------------------------------------------------------------------------------------------------------------------------------------------------------------------------------------------------------------------------------------------------------------------------------------------------------------------------------------------------------------------------|
|                                               | Brazil<br><b>Time of study:</b><br>May 7–9, 2020<br><b>No. of waves:</b><br><i>n</i> = 1<br><b>Follow-up duration:</b><br>n.a.            | <b># invited:</b><br><i>n</i> = 400<br><b># baseline:</b><br><i>n</i> = 377<br><b># follow-up:</b><br>n.a.<br><b>Age at baseline:</b><br>n.r.<br><b>% females:</b><br>62.9 %<br><b>Response:</b><br>94.3 %<br><b>Lost to follow-up:</b><br>n.a. | measures, where only essential activities in force remained open; decrees 58 and 59/2020 (published on April 15 and 30, 2020, respectively) were in effect during data collection (suspension of activities in the education network (public and private), social and sports clubs, gyms, cinemas, and bars, amongst others):<br>2 self-reported single questions from the EPICOVID-RS study:<br><b>1. level of “the social distancing</b> instructed by health authorities, that is, staying at home and avoiding contact with other people”, how much they considered they were managing to do it” (response categories: very little; little; average; a lot; practically isolated from everyone)<br><b>2. activity routine</b> (response categories: stayed at home all the time; went out only for essential things like buying food; went out from time to time to shop and stretch their legs; went out every day for some activity; went out every day, all day, to work or to perform other regular activities) | percentage of those engaging in physical activities such as gymnastics, sports, hiking, or jogging during the past seven days | <table><tr><td>Average</td><td>37.7</td><td rowspan="3"></td></tr><tr><td>A lot</td><td>n.r. (~ 25*)</td></tr><tr><td>Virtually isolated</td><td>~ 20</td></tr></table><br><b>Figure 3 (B) and text: Percentage of those engaging in physical activities</b> <table><tr><th>Activity routine</th><th>Prevalence (%)</th><th>p</th></tr><tr><td>Staying home</td><td>12.5</td><td rowspan="5">0.014</td></tr><tr><td>Leaves home for essential purchases</td><td>n.r. (~ 27*)</td></tr><tr><td>Leaves home sometimes</td><td>n.r. (~ 35*)</td></tr><tr><td>Leaves home every day</td><td>40.7</td></tr><tr><td>Leaves home every day (for work)</td><td>27.0</td></tr></table><br>Chi-square test of heterogeneity and linear trend<br>* Estimation by the review authors by reading the bars of figure 3. | Average | 37.7 |                                                                                                                                                                                                                         | A lot                     | n.r. (~ 25*)             | Virtually isolated | ~ 20 | Activity routine | Prevalence (%) | p | Staying home                                                                                             | 12.5 | 0.014 | Leaves home for essential purchases | n.r. (~ 27*) | Leaves home sometimes | n.r. (~ 35*) | Leaves home every day | 40.7 | Leaves home every day (for work) | 27.0 | + ethical approval from the Research Ethics Committee of the Federal University of Pelotas<br>+ multiple-stage process (random selection of census tracts, households, and household individuals)<br>+ high response<br>+ using Chi-square test to investigate differences<br><br>- self-reported exposure measurement with 2 single questions<br>- self-reported outcome measurement with a single item<br>- no consideration of the confounders “age” and “sex” in statistical analysis<br>- due to study design no actual chronological investigation |
| Average                                       | 37.7                                                                                                                                      |                                                                                                                                                                                                                                                 |                                                                                                                                                                                                                                                                                                                                                                                                                                                                                                                                                                                                                                                                                                                                                                                                                                                                                                                                                                                                                         |                                                                                                                               |                                                                                                                                                                                                                                                                                                                                                                                                                                                                                                                                                                                                                                                                                                                                                                                                           |         |      |                                                                                                                                                                                                                         |                           |                          |                    |      |                  |                |   |                                                                                                          |      |       |                                     |              |                       |              |                       |      |                                  |      |                                                                                                                                                                                                                                                                                                                                                                                                                                                                                                                                                          |
| A lot                                         | n.r. (~ 25*)                                                                                                                              |                                                                                                                                                                                                                                                 |                                                                                                                                                                                                                                                                                                                                                                                                                                                                                                                                                                                                                                                                                                                                                                                                                                                                                                                                                                                                                         |                                                                                                                               |                                                                                                                                                                                                                                                                                                                                                                                                                                                                                                                                                                                                                                                                                                                                                                                                           |         |      |                                                                                                                                                                                                                         |                           |                          |                    |      |                  |                |   |                                                                                                          |      |       |                                     |              |                       |              |                       |      |                                  |      |                                                                                                                                                                                                                                                                                                                                                                                                                                                                                                                                                          |
| Virtually isolated                            | ~ 20                                                                                                                                      |                                                                                                                                                                                                                                                 |                                                                                                                                                                                                                                                                                                                                                                                                                                                                                                                                                                                                                                                                                                                                                                                                                                                                                                                                                                                                                         |                                                                                                                               |                                                                                                                                                                                                                                                                                                                                                                                                                                                                                                                                                                                                                                                                                                                                                                                                           |         |      |                                                                                                                                                                                                                         |                           |                          |                    |      |                  |                |   |                                                                                                          |      |       |                                     |              |                       |              |                       |      |                                  |      |                                                                                                                                                                                                                                                                                                                                                                                                                                                                                                                                                          |
| Activity routine                              | Prevalence (%)                                                                                                                            | p                                                                                                                                                                                                                                               |                                                                                                                                                                                                                                                                                                                                                                                                                                                                                                                                                                                                                                                                                                                                                                                                                                                                                                                                                                                                                         |                                                                                                                               |                                                                                                                                                                                                                                                                                                                                                                                                                                                                                                                                                                                                                                                                                                                                                                                                           |         |      |                                                                                                                                                                                                                         |                           |                          |                    |      |                  |                |   |                                                                                                          |      |       |                                     |              |                       |              |                       |      |                                  |      |                                                                                                                                                                                                                                                                                                                                                                                                                                                                                                                                                          |
| Staying home                                  | 12.5                                                                                                                                      | 0.014                                                                                                                                                                                                                                           |                                                                                                                                                                                                                                                                                                                                                                                                                                                                                                                                                                                                                                                                                                                                                                                                                                                                                                                                                                                                                         |                                                                                                                               |                                                                                                                                                                                                                                                                                                                                                                                                                                                                                                                                                                                                                                                                                                                                                                                                           |         |      |                                                                                                                                                                                                                         |                           |                          |                    |      |                  |                |   |                                                                                                          |      |       |                                     |              |                       |              |                       |      |                                  |      |                                                                                                                                                                                                                                                                                                                                                                                                                                                                                                                                                          |
| Leaves home for essential purchases           | n.r. (~ 27*)                                                                                                                              |                                                                                                                                                                                                                                                 |                                                                                                                                                                                                                                                                                                                                                                                                                                                                                                                                                                                                                                                                                                                                                                                                                                                                                                                                                                                                                         |                                                                                                                               |                                                                                                                                                                                                                                                                                                                                                                                                                                                                                                                                                                                                                                                                                                                                                                                                           |         |      |                                                                                                                                                                                                                         |                           |                          |                    |      |                  |                |   |                                                                                                          |      |       |                                     |              |                       |              |                       |      |                                  |      |                                                                                                                                                                                                                                                                                                                                                                                                                                                                                                                                                          |
| Leaves home sometimes                         | n.r. (~ 35*)                                                                                                                              |                                                                                                                                                                                                                                                 |                                                                                                                                                                                                                                                                                                                                                                                                                                                                                                                                                                                                                                                                                                                                                                                                                                                                                                                                                                                                                         |                                                                                                                               |                                                                                                                                                                                                                                                                                                                                                                                                                                                                                                                                                                                                                                                                                                                                                                                                           |         |      |                                                                                                                                                                                                                         |                           |                          |                    |      |                  |                |   |                                                                                                          |      |       |                                     |              |                       |              |                       |      |                                  |      |                                                                                                                                                                                                                                                                                                                                                                                                                                                                                                                                                          |
| Leaves home every day                         | 40.7                                                                                                                                      |                                                                                                                                                                                                                                                 |                                                                                                                                                                                                                                                                                                                                                                                                                                                                                                                                                                                                                                                                                                                                                                                                                                                                                                                                                                                                                         |                                                                                                                               |                                                                                                                                                                                                                                                                                                                                                                                                                                                                                                                                                                                                                                                                                                                                                                                                           |         |      |                                                                                                                                                                                                                         |                           |                          |                    |      |                  |                |   |                                                                                                          |      |       |                                     |              |                       |              |                       |      |                                  |      |                                                                                                                                                                                                                                                                                                                                                                                                                                                                                                                                                          |
| Leaves home every day (for work)              | 27.0                                                                                                                                      |                                                                                                                                                                                                                                                 |                                                                                                                                                                                                                                                                                                                                                                                                                                                                                                                                                                                                                                                                                                                                                                                                                                                                                                                                                                                                                         |                                                                                                                               |                                                                                                                                                                                                                                                                                                                                                                                                                                                                                                                                                                                                                                                                                                                                                                                                           |         |      |                                                                                                                                                                                                                         |                           |                          |                    |      |                  |                |   |                                                                                                          |      |       |                                     |              |                       |              |                       |      |                                  |      |                                                                                                                                                                                                                                                                                                                                                                                                                                                                                                                                                          |
| Daly & Robinson, 2021                         | <b>Study design:</b><br>Cohort study<br><b>Study name:</b><br>1970 British Cohort Study                                                   | <b>Description:</b><br>Adults born in Britain in 1970<br><b>Inclusion criteria:</b><br><b># baseline:</b>                                                                                                                                       | <b>COVID-19 lockdown restrictions:</b><br>- pubs, bars, and restaurants and other nonessential businesses were closed for                                                                                                                                                                                                                                                                                                                                                                                                                                                                                                                                                                                                                                                                                                                                                                                                                                                                                               | <b>High risk alcohol consumption:</b><br>Alcohol Use Disorders Identification Test (AUDIT) for detecting                      | <b>Text: Overall AUDITPC score</b> <table><tr><td></td><td><b>2016–2018 (M (SD))</b></td><td><b>May 2020 (M (SD))</b></td><td><b>p</b></td></tr><tr><td></td><td></td><td></td><td></td></tr></table>                                                                                                                                                                                                                                                                                                                                                                                                                                                                                                                                                                                                     |         |      |                                                                                                                                                                                                                         | <b>2016–2018 (M (SD))</b> | <b>May 2020 (M (SD))</b> | <b>p</b>           |      |                  |                |   | <b>Overall study quality:</b><br>High risk<br><b>Conflict of interest:</b><br>Unclear<br><b>Funding:</b> |      |       |                                     |              |                       |              |                       |      |                                  |      |                                                                                                                                                                                                                                                                                                                                                                                                                                                                                                                                                          |
|                                               | <b>2016–2018 (M (SD))</b>                                                                                                                 | <b>May 2020 (M (SD))</b>                                                                                                                                                                                                                        | <b>p</b>                                                                                                                                                                                                                                                                                                                                                                                                                                                                                                                                                                                                                                                                                                                                                                                                                                                                                                                                                                                                                |                                                                                                                               |                                                                                                                                                                                                                                                                                                                                                                                                                                                                                                                                                                                                                                                                                                                                                                                                           |         |      |                                                                                                                                                                                                                         |                           |                          |                    |      |                  |                |   |                                                                                                          |      |       |                                     |              |                       |              |                       |      |                                  |      |                                                                                                                                                                                                                                                                                                                                                                                                                                                                                                                                                          |
|                                               |                                                                                                                                           |                                                                                                                                                                                                                                                 |                                                                                                                                                                                                                                                                                                                                                                                                                                                                                                                                                                                                                                                                                                                                                                                                                                                                                                                                                                                                                         |                                                                                                                               |                                                                                                                                                                                                                                                                                                                                                                                                                                                                                                                                                                                                                                                                                                                                                                                                           |         |      |                                                                                                                                                                                                                         |                           |                          |                    |      |                  |                |   |                                                                                                          |      |       |                                     |              |                       |              |                       |      |                                  |      |                                                                                                                                                                                                                                                                                                                                                                                                                                                                                                                                                          |

| Reference<br>(First author, publication year) | General<br>(Study design<br>Study name<br>Country of study<br>Time of study<br>No. of waves<br>Follow-up duration<br>(e.g., mean, range))                                                                                                                                           | Population<br>(Description<br>Inclusion criteria<br># invited<br># baseline<br># follow-up<br>Age at baseline<br>% females<br>Response<br>Lost to follow-up)                                                                                                                                                                                                                                                 | Exposure<br>(Description & assessment)                                                                                            | Outcome<br>(Description & assessment)                                                                                                                                                                                     | Results<br>(Description of all topically relevant results)                                                                                                                                                                                                                                                                                                                                                                                                                                                                                                                                                                                                                                                                                                                                                                                                                                                    | Comments<br>(study quality [overall assessment according to Iljaz/Shamliyan/SIGN/CASP]<br>Conflict of interest [stated vs. not stated]<br>Funding (public, non-profit, commercial)<br>Strengths (+) and weaknesses (-)) |                |                     |       |                 |               |                    |                          |              |      |                 |                           |                    |      |            |                            |                               |      |           |                           |                                                                                                                                                                                                                                                                                                                                                                                              |      |              |  |                               |      |           |      |                               |      |                                                                                                                                                                                                                                                                                                                                                                                                                                                                                                                         |
|-----------------------------------------------|-------------------------------------------------------------------------------------------------------------------------------------------------------------------------------------------------------------------------------------------------------------------------------------|--------------------------------------------------------------------------------------------------------------------------------------------------------------------------------------------------------------------------------------------------------------------------------------------------------------------------------------------------------------------------------------------------------------|-----------------------------------------------------------------------------------------------------------------------------------|---------------------------------------------------------------------------------------------------------------------------------------------------------------------------------------------------------------------------|---------------------------------------------------------------------------------------------------------------------------------------------------------------------------------------------------------------------------------------------------------------------------------------------------------------------------------------------------------------------------------------------------------------------------------------------------------------------------------------------------------------------------------------------------------------------------------------------------------------------------------------------------------------------------------------------------------------------------------------------------------------------------------------------------------------------------------------------------------------------------------------------------------------|-------------------------------------------------------------------------------------------------------------------------------------------------------------------------------------------------------------------------|----------------|---------------------|-------|-----------------|---------------|--------------------|--------------------------|--------------|------|-----------------|---------------------------|--------------------|------|------------|----------------------------|-------------------------------|------|-----------|---------------------------|----------------------------------------------------------------------------------------------------------------------------------------------------------------------------------------------------------------------------------------------------------------------------------------------------------------------------------------------------------------------------------------------|------|--------------|--|-------------------------------|------|-----------|------|-------------------------------|------|-------------------------------------------------------------------------------------------------------------------------------------------------------------------------------------------------------------------------------------------------------------------------------------------------------------------------------------------------------------------------------------------------------------------------------------------------------------------------------------------------------------------------|
|                                               | <b>Country of study:</b><br>United Kingdom<br><b>Time of study:</b><br>Baseline: 2016–2018<br>Follow-up: May 2020<br><b>No. of waves:</b><br><i>n</i> = 2<br><b>Follow-up duration:</b><br>Range: 2–4 years                                                                         | n.r.<br><b># invited at follow-up:</b><br><i>n</i> = 10,458<br><b># follow-up:</b><br><i>n</i> = 3,358 (those who took part at baseline and at follow-up)<br><b>Age at baseline:</b><br>Range: 46–48 years<br><b>% females:</b><br>50.0 %<br><b>Response (at follow-up):</b><br>32.1 %<br><b>Lost to follow-up:</b><br>n.r.                                                                                  | > 3 months between late March and early July 2020                                                                                 | hazardous drinkers in primary care settings (AUDITPC)<br>- for the COVID-19 survey, the AUDIT-PC was adapted by adding<br>Since the start of the Coronavirus outbreak to the start of each item<br>- High risk score: ≥ 5 | <table><tr><td>Total sample</td><td>3.17 (2.46)</td><td>3.34 (2.77)</td><td>0.003</td></tr></table><br><b>Table 1: Prevalence of high-risk drinking</b> <table><tr><th></th><th>2016–2018 (%)</th><th>May 2020 (%)</th><th>Difference (%) (95 % CI)</th></tr><tr><td>Total sample</td><td>19.3</td><td>24.6</td><td>5.2 (2.4–8.0) (p &lt; 0.001)</td></tr><tr><td>Men</td><td>24.7</td><td>29.9</td><td>5.2 (0.5–10.1) (p &lt; 0.001)</td></tr><tr><td>Women</td><td>14.0</td><td>19.2</td><td>5.2 (2.3–8.1) (p &lt; 0.001)</td></tr></table><br>Logistic regression analyses<br>Adjusted for sex, marital status, educational qualifications, diagnosis of a chronic mental or physical health condition, year when the 2016–2018 baseline survey was completed                                                                                                                                              | Total sample                                                                                                                                                                                                            | 3.17 (2.46)    | 3.34 (2.77)         | 0.003 |                 | 2016–2018 (%) | May 2020 (%)       | Difference (%) (95 % CI) | Total sample | 19.3 | 24.6            | 5.2 (2.4–8.0) (p < 0.001) | Men                | 24.7 | 29.9       | 5.2 (0.5–10.1) (p < 0.001) | Women                         | 14.0 | 19.2      | 5.2 (2.3–8.1) (p < 0.001) | Public funds<br><br>+ ethical approval from the National Research Ethics Service<br>+ validated outcome measure<br>+ using logistic regression analyses to investigate differences<br>+ statistical analysis of confounders “sex” (adjustment) and “age” (homogeneous group)<br>+ temporal investigation<br><br>- no information on lost to follow-up and number of participants at baseline |      |              |  |                               |      |           |      |                               |      |                                                                                                                                                                                                                                                                                                                                                                                                                                                                                                                         |
| Total sample                                  | 3.17 (2.46)                                                                                                                                                                                                                                                                         | 3.34 (2.77)                                                                                                                                                                                                                                                                                                                                                                                                  | 0.003                                                                                                                             |                                                                                                                                                                                                                           |                                                                                                                                                                                                                                                                                                                                                                                                                                                                                                                                                                                                                                                                                                                                                                                                                                                                                                               |                                                                                                                                                                                                                         |                |                     |       |                 |               |                    |                          |              |      |                 |                           |                    |      |            |                            |                               |      |           |                           |                                                                                                                                                                                                                                                                                                                                                                                              |      |              |  |                               |      |           |      |                               |      |                                                                                                                                                                                                                                                                                                                                                                                                                                                                                                                         |
|                                               | 2016–2018 (%)                                                                                                                                                                                                                                                                       | May 2020 (%)                                                                                                                                                                                                                                                                                                                                                                                                 | Difference (%) (95 % CI)                                                                                                          |                                                                                                                                                                                                                           |                                                                                                                                                                                                                                                                                                                                                                                                                                                                                                                                                                                                                                                                                                                                                                                                                                                                                                               |                                                                                                                                                                                                                         |                |                     |       |                 |               |                    |                          |              |      |                 |                           |                    |      |            |                            |                               |      |           |                           |                                                                                                                                                                                                                                                                                                                                                                                              |      |              |  |                               |      |           |      |                               |      |                                                                                                                                                                                                                                                                                                                                                                                                                                                                                                                         |
| Total sample                                  | 19.3                                                                                                                                                                                                                                                                                | 24.6                                                                                                                                                                                                                                                                                                                                                                                                         | 5.2 (2.4–8.0) (p < 0.001)                                                                                                         |                                                                                                                                                                                                                           |                                                                                                                                                                                                                                                                                                                                                                                                                                                                                                                                                                                                                                                                                                                                                                                                                                                                                                               |                                                                                                                                                                                                                         |                |                     |       |                 |               |                    |                          |              |      |                 |                           |                    |      |            |                            |                               |      |           |                           |                                                                                                                                                                                                                                                                                                                                                                                              |      |              |  |                               |      |           |      |                               |      |                                                                                                                                                                                                                                                                                                                                                                                                                                                                                                                         |
| Men                                           | 24.7                                                                                                                                                                                                                                                                                | 29.9                                                                                                                                                                                                                                                                                                                                                                                                         | 5.2 (0.5–10.1) (p < 0.001)                                                                                                        |                                                                                                                                                                                                                           |                                                                                                                                                                                                                                                                                                                                                                                                                                                                                                                                                                                                                                                                                                                                                                                                                                                                                                               |                                                                                                                                                                                                                         |                |                     |       |                 |               |                    |                          |              |      |                 |                           |                    |      |            |                            |                               |      |           |                           |                                                                                                                                                                                                                                                                                                                                                                                              |      |              |  |                               |      |           |      |                               |      |                                                                                                                                                                                                                                                                                                                                                                                                                                                                                                                         |
| Women                                         | 14.0                                                                                                                                                                                                                                                                                | 19.2                                                                                                                                                                                                                                                                                                                                                                                                         | 5.2 (2.3–8.1) (p < 0.001)                                                                                                         |                                                                                                                                                                                                                           |                                                                                                                                                                                                                                                                                                                                                                                                                                                                                                                                                                                                                                                                                                                                                                                                                                                                                                               |                                                                                                                                                                                                                         |                |                     |       |                 |               |                    |                          |              |      |                 |                           |                    |      |            |                            |                               |      |           |                           |                                                                                                                                                                                                                                                                                                                                                                                              |      |              |  |                               |      |           |      |                               |      |                                                                                                                                                                                                                                                                                                                                                                                                                                                                                                                         |
| Duncan et al., 2020                           | <b>Study design:</b><br>Cross-sectional study<br><b>Study name:</b><br>Washington State Twin Registry<br><b>Country of study:</b><br>United States<br><b>Time of study:</b><br>March 26–April 5, 2020<br><b>No. of waves:</b><br><i>n</i> = 1<br><b>Follow-up duration:</b><br>n.a. | <b>Description:</b><br>Adult Twins<br><b>Inclusion criteria:</b><br>Identical, same-sex fraternal twins<br><b># invited:</b><br><i>n</i> = 12,173<br><b># baseline:</b><br><i>n</i> = 3,971<br><b># follow-up:</b><br>n.a.<br><b>Age at baseline:</b><br>M: 50.4 years (SD: 16.0)<br><b>% females:</b><br>69.2 %<br><b>Response:</b><br>Individual: 32.8 %<br>Pair-wise: 21.1 %<br><b>Lost to follow-up:</b> | <b>COVID-19 mitigation strategies:</b><br>Washington implemented the state-wide “stay home, stay healthy” order on March 24, 2020 | <b>(Change in) physical activity:</b><br>1 self-reported single question                                                                                                                                                  | <b>Table 1 and text: Descriptive statistics for the change in physical activity compared to one month ago (i.e., prior to the spread of COVID-19)</b> <table><tr><th></th><th>Prevalence (%)</th></tr><tr><td><b>Total sample</b></td><td></td></tr><tr><td>Decreased a lot</td><td>15.1</td></tr><tr><td>Decreased somewhat</td><td>28.7</td></tr><tr><td>No change</td><td>26.4</td></tr><tr><td>Increased a lot</td><td>5.2</td></tr><tr><td>Increased somewhat</td><td>21.2</td></tr><tr><td><b>Men</b></td><td></td></tr><tr><td>Decreased (a lot or somewhat)</td><td>45.3</td></tr><tr><td>No change</td><td>29.8</td></tr><tr><td>Increased (a lot or somewhat)</td><td>25.5</td></tr><tr><td><b>Women</b></td><td></td></tr><tr><td>Decreased (a lot or somewhat)</td><td>41.5</td></tr><tr><td>No change</td><td>31.1</td></tr><tr><td>Increased (a lot or somewhat)</td><td>27.4</td></tr></table> |                                                                                                                                                                                                                         | Prevalence (%) | <b>Total sample</b> |       | Decreased a lot | 15.1          | Decreased somewhat | 28.7                     | No change    | 26.4 | Increased a lot | 5.2                       | Increased somewhat | 21.2 | <b>Men</b> |                            | Decreased (a lot or somewhat) | 45.3 | No change | 29.8                      | Increased (a lot or somewhat)                                                                                                                                                                                                                                                                                                                                                                | 25.5 | <b>Women</b> |  | Decreased (a lot or somewhat) | 41.5 | No change | 31.1 | Increased (a lot or somewhat) | 27.4 | <b>Overall study quality:</b><br>High risk<br><b>Conflict of interest:</b><br>Stated (none declared)<br><b>Funding:</b><br>Public funds<br><br>+ethical approval from the Institutional Review Board at Washington State University<br>+ recruitment in the Washington State Twin Registry (identification of twins by the Washington State Department of Licensing (DOL), researchers receive a list of potential twins from the DOL on a weekly basis, the register sends potential participants an enrolment survey, |
|                                               | Prevalence (%)                                                                                                                                                                                                                                                                      |                                                                                                                                                                                                                                                                                                                                                                                                              |                                                                                                                                   |                                                                                                                                                                                                                           |                                                                                                                                                                                                                                                                                                                                                                                                                                                                                                                                                                                                                                                                                                                                                                                                                                                                                                               |                                                                                                                                                                                                                         |                |                     |       |                 |               |                    |                          |              |      |                 |                           |                    |      |            |                            |                               |      |           |                           |                                                                                                                                                                                                                                                                                                                                                                                              |      |              |  |                               |      |           |      |                               |      |                                                                                                                                                                                                                                                                                                                                                                                                                                                                                                                         |
| <b>Total sample</b>                           |                                                                                                                                                                                                                                                                                     |                                                                                                                                                                                                                                                                                                                                                                                                              |                                                                                                                                   |                                                                                                                                                                                                                           |                                                                                                                                                                                                                                                                                                                                                                                                                                                                                                                                                                                                                                                                                                                                                                                                                                                                                                               |                                                                                                                                                                                                                         |                |                     |       |                 |               |                    |                          |              |      |                 |                           |                    |      |            |                            |                               |      |           |                           |                                                                                                                                                                                                                                                                                                                                                                                              |      |              |  |                               |      |           |      |                               |      |                                                                                                                                                                                                                                                                                                                                                                                                                                                                                                                         |
| Decreased a lot                               | 15.1                                                                                                                                                                                                                                                                                |                                                                                                                                                                                                                                                                                                                                                                                                              |                                                                                                                                   |                                                                                                                                                                                                                           |                                                                                                                                                                                                                                                                                                                                                                                                                                                                                                                                                                                                                                                                                                                                                                                                                                                                                                               |                                                                                                                                                                                                                         |                |                     |       |                 |               |                    |                          |              |      |                 |                           |                    |      |            |                            |                               |      |           |                           |                                                                                                                                                                                                                                                                                                                                                                                              |      |              |  |                               |      |           |      |                               |      |                                                                                                                                                                                                                                                                                                                                                                                                                                                                                                                         |
| Decreased somewhat                            | 28.7                                                                                                                                                                                                                                                                                |                                                                                                                                                                                                                                                                                                                                                                                                              |                                                                                                                                   |                                                                                                                                                                                                                           |                                                                                                                                                                                                                                                                                                                                                                                                                                                                                                                                                                                                                                                                                                                                                                                                                                                                                                               |                                                                                                                                                                                                                         |                |                     |       |                 |               |                    |                          |              |      |                 |                           |                    |      |            |                            |                               |      |           |                           |                                                                                                                                                                                                                                                                                                                                                                                              |      |              |  |                               |      |           |      |                               |      |                                                                                                                                                                                                                                                                                                                                                                                                                                                                                                                         |
| No change                                     | 26.4                                                                                                                                                                                                                                                                                |                                                                                                                                                                                                                                                                                                                                                                                                              |                                                                                                                                   |                                                                                                                                                                                                                           |                                                                                                                                                                                                                                                                                                                                                                                                                                                                                                                                                                                                                                                                                                                                                                                                                                                                                                               |                                                                                                                                                                                                                         |                |                     |       |                 |               |                    |                          |              |      |                 |                           |                    |      |            |                            |                               |      |           |                           |                                                                                                                                                                                                                                                                                                                                                                                              |      |              |  |                               |      |           |      |                               |      |                                                                                                                                                                                                                                                                                                                                                                                                                                                                                                                         |
| Increased a lot                               | 5.2                                                                                                                                                                                                                                                                                 |                                                                                                                                                                                                                                                                                                                                                                                                              |                                                                                                                                   |                                                                                                                                                                                                                           |                                                                                                                                                                                                                                                                                                                                                                                                                                                                                                                                                                                                                                                                                                                                                                                                                                                                                                               |                                                                                                                                                                                                                         |                |                     |       |                 |               |                    |                          |              |      |                 |                           |                    |      |            |                            |                               |      |           |                           |                                                                                                                                                                                                                                                                                                                                                                                              |      |              |  |                               |      |           |      |                               |      |                                                                                                                                                                                                                                                                                                                                                                                                                                                                                                                         |
| Increased somewhat                            | 21.2                                                                                                                                                                                                                                                                                |                                                                                                                                                                                                                                                                                                                                                                                                              |                                                                                                                                   |                                                                                                                                                                                                                           |                                                                                                                                                                                                                                                                                                                                                                                                                                                                                                                                                                                                                                                                                                                                                                                                                                                                                                               |                                                                                                                                                                                                                         |                |                     |       |                 |               |                    |                          |              |      |                 |                           |                    |      |            |                            |                               |      |           |                           |                                                                                                                                                                                                                                                                                                                                                                                              |      |              |  |                               |      |           |      |                               |      |                                                                                                                                                                                                                                                                                                                                                                                                                                                                                                                         |
| <b>Men</b>                                    |                                                                                                                                                                                                                                                                                     |                                                                                                                                                                                                                                                                                                                                                                                                              |                                                                                                                                   |                                                                                                                                                                                                                           |                                                                                                                                                                                                                                                                                                                                                                                                                                                                                                                                                                                                                                                                                                                                                                                                                                                                                                               |                                                                                                                                                                                                                         |                |                     |       |                 |               |                    |                          |              |      |                 |                           |                    |      |            |                            |                               |      |           |                           |                                                                                                                                                                                                                                                                                                                                                                                              |      |              |  |                               |      |           |      |                               |      |                                                                                                                                                                                                                                                                                                                                                                                                                                                                                                                         |
| Decreased (a lot or somewhat)                 | 45.3                                                                                                                                                                                                                                                                                |                                                                                                                                                                                                                                                                                                                                                                                                              |                                                                                                                                   |                                                                                                                                                                                                                           |                                                                                                                                                                                                                                                                                                                                                                                                                                                                                                                                                                                                                                                                                                                                                                                                                                                                                                               |                                                                                                                                                                                                                         |                |                     |       |                 |               |                    |                          |              |      |                 |                           |                    |      |            |                            |                               |      |           |                           |                                                                                                                                                                                                                                                                                                                                                                                              |      |              |  |                               |      |           |      |                               |      |                                                                                                                                                                                                                                                                                                                                                                                                                                                                                                                         |
| No change                                     | 29.8                                                                                                                                                                                                                                                                                |                                                                                                                                                                                                                                                                                                                                                                                                              |                                                                                                                                   |                                                                                                                                                                                                                           |                                                                                                                                                                                                                                                                                                                                                                                                                                                                                                                                                                                                                                                                                                                                                                                                                                                                                                               |                                                                                                                                                                                                                         |                |                     |       |                 |               |                    |                          |              |      |                 |                           |                    |      |            |                            |                               |      |           |                           |                                                                                                                                                                                                                                                                                                                                                                                              |      |              |  |                               |      |           |      |                               |      |                                                                                                                                                                                                                                                                                                                                                                                                                                                                                                                         |
| Increased (a lot or somewhat)                 | 25.5                                                                                                                                                                                                                                                                                |                                                                                                                                                                                                                                                                                                                                                                                                              |                                                                                                                                   |                                                                                                                                                                                                                           |                                                                                                                                                                                                                                                                                                                                                                                                                                                                                                                                                                                                                                                                                                                                                                                                                                                                                                               |                                                                                                                                                                                                                         |                |                     |       |                 |               |                    |                          |              |      |                 |                           |                    |      |            |                            |                               |      |           |                           |                                                                                                                                                                                                                                                                                                                                                                                              |      |              |  |                               |      |           |      |                               |      |                                                                                                                                                                                                                                                                                                                                                                                                                                                                                                                         |
| <b>Women</b>                                  |                                                                                                                                                                                                                                                                                     |                                                                                                                                                                                                                                                                                                                                                                                                              |                                                                                                                                   |                                                                                                                                                                                                                           |                                                                                                                                                                                                                                                                                                                                                                                                                                                                                                                                                                                                                                                                                                                                                                                                                                                                                                               |                                                                                                                                                                                                                         |                |                     |       |                 |               |                    |                          |              |      |                 |                           |                    |      |            |                            |                               |      |           |                           |                                                                                                                                                                                                                                                                                                                                                                                              |      |              |  |                               |      |           |      |                               |      |                                                                                                                                                                                                                                                                                                                                                                                                                                                                                                                         |
| Decreased (a lot or somewhat)                 | 41.5                                                                                                                                                                                                                                                                                |                                                                                                                                                                                                                                                                                                                                                                                                              |                                                                                                                                   |                                                                                                                                                                                                                           |                                                                                                                                                                                                                                                                                                                                                                                                                                                                                                                                                                                                                                                                                                                                                                                                                                                                                                               |                                                                                                                                                                                                                         |                |                     |       |                 |               |                    |                          |              |      |                 |                           |                    |      |            |                            |                               |      |           |                           |                                                                                                                                                                                                                                                                                                                                                                                              |      |              |  |                               |      |           |      |                               |      |                                                                                                                                                                                                                                                                                                                                                                                                                                                                                                                         |
| No change                                     | 31.1                                                                                                                                                                                                                                                                                |                                                                                                                                                                                                                                                                                                                                                                                                              |                                                                                                                                   |                                                                                                                                                                                                                           |                                                                                                                                                                                                                                                                                                                                                                                                                                                                                                                                                                                                                                                                                                                                                                                                                                                                                                               |                                                                                                                                                                                                                         |                |                     |       |                 |               |                    |                          |              |      |                 |                           |                    |      |            |                            |                               |      |           |                           |                                                                                                                                                                                                                                                                                                                                                                                              |      |              |  |                               |      |           |      |                               |      |                                                                                                                                                                                                                                                                                                                                                                                                                                                                                                                         |
| Increased (a lot or somewhat)                 | 27.4                                                                                                                                                                                                                                                                                |                                                                                                                                                                                                                                                                                                                                                                                                              |                                                                                                                                   |                                                                                                                                                                                                                           |                                                                                                                                                                                                                                                                                                                                                                                                                                                                                                                                                                                                                                                                                                                                                                                                                                                                                                               |                                                                                                                                                                                                                         |                |                     |       |                 |               |                    |                          |              |      |                 |                           |                    |      |            |                            |                               |      |           |                           |                                                                                                                                                                                                                                                                                                                                                                                              |      |              |  |                               |      |           |      |                               |      |                                                                                                                                                                                                                                                                                                                                                                                                                                                                                                                         |

| Reference<br>(First author, publication year) | General<br>(Study design<br>Study name<br>Country of study<br>Time of study<br>No. of waves<br>Follow-up duration<br>(e.g., mean, range))                                                                                                    | Population<br>(Description<br>Inclusion criteria<br># invited<br># baseline<br># follow-up<br>Age at baseline<br>% females<br>Response<br>Lost to follow-up)                                                                                                                                                                                                                                                        | Exposure<br>(Description & assessment)                                                                                                                                                                                                                                                                                                                                                                                                                                                             | Outcome<br>(Description & assessment)                                                                                                              | Results<br>(Description of all topically relevant results)                                                                                                                                                                                                                  | Comments<br>(study quality [overall assessment according to Iijaz/Shamliyan/SIGN/CASP]<br>Conflict of interest [stated vs. not stated]<br>Funding (public, non-profit, commercial)<br>Strengths (+) and weaknesses (-))                                                                                                                                                                                                         |              |                           |            |                           |            |                                                                                                                                                                                                                                                                                                                                                                                                                                  |
|-----------------------------------------------|----------------------------------------------------------------------------------------------------------------------------------------------------------------------------------------------------------------------------------------------|---------------------------------------------------------------------------------------------------------------------------------------------------------------------------------------------------------------------------------------------------------------------------------------------------------------------------------------------------------------------------------------------------------------------|----------------------------------------------------------------------------------------------------------------------------------------------------------------------------------------------------------------------------------------------------------------------------------------------------------------------------------------------------------------------------------------------------------------------------------------------------------------------------------------------------|----------------------------------------------------------------------------------------------------------------------------------------------------|-----------------------------------------------------------------------------------------------------------------------------------------------------------------------------------------------------------------------------------------------------------------------------|---------------------------------------------------------------------------------------------------------------------------------------------------------------------------------------------------------------------------------------------------------------------------------------------------------------------------------------------------------------------------------------------------------------------------------|--------------|---------------------------|------------|---------------------------|------------|----------------------------------------------------------------------------------------------------------------------------------------------------------------------------------------------------------------------------------------------------------------------------------------------------------------------------------------------------------------------------------------------------------------------------------|
|                                               |                                                                                                                                                                                                                                              | n.a.                                                                                                                                                                                                                                                                                                                                                                                                                |                                                                                                                                                                                                                                                                                                                                                                                                                                                                                                    |                                                                                                                                                    |                                                                                                                                                                                                                                                                             | and twins are enrolled when surveys have been received from both members)<br>+ stratification of the results for the confounder “sex”<br><br>- low response and no non-responder analysis<br>- outcome measurement with a self-reported single question<br>- no consideration of the confounder “age” in the statistical analysis<br>- descriptive analysis only<br>- due to study design no actual chronological investigation |              |                           |            |                           |            |                                                                                                                                                                                                                                                                                                                                                                                                                                  |
| Garre-Olmo et al., 2020                       | <b>Study design:</b> Cross-sectional study<br><b>Study name:</b> Girona Healthy Region Study<br><b>Country of study:</b> Spain<br><b>Time of study:</b> April 8–May 4, 2020<br><b>No. of waves:</b> n = 1<br><b>Follow-up duration:</b> n.a. | <b>Description:</b> Adults from the general population<br><b>Inclusion criteria:</b> Residents living in the province of Girona (Catalonia), Spain, aged ≥ 18 years, exclusion of subjects with terminal illness, cognitive impairment or dementia, intellectual disability, or institutionalized<br><b># invited:</b> n = 765<br><b># baseline:</b> n = 692<br><b># follow-up:</b> n.a.<br><b>Age at baseline:</b> | <b>Movement restrictions and confinement due to the COVID-19 pandemic</b> (state of alarm implemented by the Spanish government on March 15, 2020):<br>- suspension of all academic activities<br>- Spanish citizens were obliged to stay at home except to purchase food and medicines, to go to work, or to attend emergencies<br>(- more restrictive lockdown period that included the temporary closure of all the non-essential activities and businesses between March 29 and April 9, 2020) | <b>(Change in) physical activity:</b><br>1 self-reported single question<br><b>(Change in) dietary pattern:</b><br>1 self-reported single question | <b>Table 2: Characteristics of study participants regarding confinement consequences</b> <table><tr><td></td><td><b>N (%)</b></td></tr><tr><td>Worsening dietary pattern</td><td>134 (19.4)</td></tr><tr><td>Diminished sport practice</td><td>420 (60.7)</td></tr></table> |                                                                                                                                                                                                                                                                                                                                                                                                                                 | <b>N (%)</b> | Worsening dietary pattern | 134 (19.4) | Diminished sport practice | 420 (60.7) | <b>Overall study quality:</b> High risk<br><b>Conflict of interest:</b> Stated (none declared)<br><b>Funding:</b> Public funds<br><br>+ ethical approval from Ethics Committee of the IDIAP Jordi Gol<br>+ ratified random sampling procedure according to the population structure<br>+ high response<br>+ non-responder analysis (no differences by age or gender between participants and persons who refused to participate) |
|                                               | <b>N (%)</b>                                                                                                                                                                                                                                 |                                                                                                                                                                                                                                                                                                                                                                                                                     |                                                                                                                                                                                                                                                                                                                                                                                                                                                                                                    |                                                                                                                                                    |                                                                                                                                                                                                                                                                             |                                                                                                                                                                                                                                                                                                                                                                                                                                 |              |                           |            |                           |            |                                                                                                                                                                                                                                                                                                                                                                                                                                  |
| Worsening dietary pattern                     | 134 (19.4)                                                                                                                                                                                                                                   |                                                                                                                                                                                                                                                                                                                                                                                                                     |                                                                                                                                                                                                                                                                                                                                                                                                                                                                                                    |                                                                                                                                                    |                                                                                                                                                                                                                                                                             |                                                                                                                                                                                                                                                                                                                                                                                                                                 |              |                           |            |                           |            |                                                                                                                                                                                                                                                                                                                                                                                                                                  |
| Diminished sport practice                     | 420 (60.7)                                                                                                                                                                                                                                   |                                                                                                                                                                                                                                                                                                                                                                                                                     |                                                                                                                                                                                                                                                                                                                                                                                                                                                                                                    |                                                                                                                                                    |                                                                                                                                                                                                                                                                             |                                                                                                                                                                                                                                                                                                                                                                                                                                 |              |                           |            |                           |            |                                                                                                                                                                                                                                                                                                                                                                                                                                  |

| Reference<br>(First author, publication year) | General<br>(Study design<br>Study name<br>Country of study<br>Time of study<br>No. of waves<br>Follow-up duration<br>(e.g., mean, range))                                                                                                                                                                            | Population<br>(Description<br>Inclusion criteria<br># invited<br># baseline<br># follow-up<br>Age at baseline<br>% females<br>Response<br>Lost to follow-up)                                                                                                                                                                                                                              | Exposure<br>(Description & assessment)                                                                                                                                                                                                                                                                         | Outcome<br>(Description & assessment)                                                                                                                                                                                                                                                                                                                                          | Results<br>(Description of all topically relevant results)                                                                                                                                                                                                                                                                                                                                                                                                                                                                                                                                                                                                                                                                                                                                                                                                                                                                                              | Comments<br>(study quality [overall assessment according to Iijaz/Shamliyan/SIGN/CASP]<br>Conflict of interest [stated vs. not stated]<br>Funding (public, non-profit, commercial)<br>Strengths (+) and weaknesses (-))                      |                                    |                                     |   |                |               |             |          |              |               |             |       |  |                |                |  |           |    |          |    |          |    |              |  |           |    |          |    |          |    |                                                                                                                                                                                                                                                                                                                                                                                                                                                                                                                                                                                                                                                                                        |
|-----------------------------------------------|----------------------------------------------------------------------------------------------------------------------------------------------------------------------------------------------------------------------------------------------------------------------------------------------------------------------|-------------------------------------------------------------------------------------------------------------------------------------------------------------------------------------------------------------------------------------------------------------------------------------------------------------------------------------------------------------------------------------------|----------------------------------------------------------------------------------------------------------------------------------------------------------------------------------------------------------------------------------------------------------------------------------------------------------------|--------------------------------------------------------------------------------------------------------------------------------------------------------------------------------------------------------------------------------------------------------------------------------------------------------------------------------------------------------------------------------|---------------------------------------------------------------------------------------------------------------------------------------------------------------------------------------------------------------------------------------------------------------------------------------------------------------------------------------------------------------------------------------------------------------------------------------------------------------------------------------------------------------------------------------------------------------------------------------------------------------------------------------------------------------------------------------------------------------------------------------------------------------------------------------------------------------------------------------------------------------------------------------------------------------------------------------------------------|----------------------------------------------------------------------------------------------------------------------------------------------------------------------------------------------------------------------------------------------|------------------------------------|-------------------------------------|---|----------------|---------------|-------------|----------|--------------|---------------|-------------|-------|--|----------------|----------------|--|-----------|----|----------|----|----------|----|--------------|--|-----------|----|----------|----|----------|----|----------------------------------------------------------------------------------------------------------------------------------------------------------------------------------------------------------------------------------------------------------------------------------------------------------------------------------------------------------------------------------------------------------------------------------------------------------------------------------------------------------------------------------------------------------------------------------------------------------------------------------------------------------------------------------------|
|                                               |                                                                                                                                                                                                                                                                                                                      | M: 50.2 years (SD: 16.3, range: 18.9–90.9)<br><b>% females:</b><br>54.8 %<br><b>Response:</b><br>90.5 %<br><b>Lost to follow-up:</b><br>n.a.                                                                                                                                                                                                                                              |                                                                                                                                                                                                                                                                                                                |                                                                                                                                                                                                                                                                                                                                                                                |                                                                                                                                                                                                                                                                                                                                                                                                                                                                                                                                                                                                                                                                                                                                                                                                                                                                                                                                                         | - outcome measurement with self-reported single questions<br>- descriptive analysis only<br>- no consideration of the confounders “age” and “sex” in the statistical analysis<br>- due to study design no actual chronological investigation |                                    |                                     |   |                |               |             |          |              |               |             |       |  |                |                |  |           |    |          |    |          |    |              |  |           |    |          |    |          |    |                                                                                                                                                                                                                                                                                                                                                                                                                                                                                                                                                                                                                                                                                        |
| Karuc et al., 2020                            | <b>Study design:</b><br>Cross-sectional study<br><b>Study name:</b><br>Croatian physical activity in adolescence longitudinal study (CRO-PALS)<br><b>Country of study:</b><br>Croatia<br><b>Time of study:</b><br>April 24–May 8, 2020<br><b>No. of waves:</b><br><i>n</i> = 1<br><b>Follow-up duration:</b><br>n.a. | <b>Description:</b><br>Young adults<br><b>Inclusion criteria:</b><br>n.r.<br><b># invited:</b><br><i>n</i> = 363<br><b># baseline:</b><br><i>n</i> = 91<br><b># follow-up:</b><br>n.a.<br><b>Age at baseline:</b><br>Females: M: 21.6 years (SD: 0.4)<br>Males: M: 21.5 years (SD: 0.3)<br><b>% females:</b><br>64.8 %<br><b>Response:</b><br>25.1 %<br><b>Lost to follow-up:</b><br>n.a. | <b>Restrictions due to COVID-19 Pandemic</b> (March 19 <sup>th</sup> –May 11, 2020):<br>- restricting gathering in public places and parks<br>- suspension of public transportation, and close institutions<br>- prohibition of all social gatherings, work in retail and services including sports activities | <b>Physical activity:</b><br>- 7-day recall of moderate intensity physical activity (MPA) and vigorous intensity physical activity (VPA): School Health Action, Planning, and Evaluation System (SHAPES) questionnaire<br>- (Change in) physical activity: self-reported single question<br><br>Retrospective assessment of levels pre-restrictions using the same instruments | <b>Table 1: Moderate-to-vigorous physical activity (minutes/day) since restrictions</b> <table><tr><th></th><th>Pre-restrictions<br/>(Median (IQR))</th><th>Post-restrictions<br/>(Median (IQR))</th><th>p</th></tr><tr><td><b>Females</b></td><td>120.0 (227.1)</td><td>64.3 (75.0)</td><td>&gt; 0.0001</td></tr><tr><td><b>Males</b></td><td>135.0 (127.5)</td><td>85.7 (56.8)</td><td>0.006</td></tr></table><br>ANOVA<br>- no interaction between sex and time (p = 0.79)<br><br><b>Table 1: Descriptive statistics in changes of physical activity since restrictions</b> <table><tr><th></th><th>Prevalence (%)</th></tr><tr><td><b>Females</b></td><td></td></tr><tr><td>No change</td><td>25</td></tr><tr><td>Increase</td><td>19</td></tr><tr><td>Decrease</td><td>56</td></tr><tr><td><b>Males</b></td><td></td></tr><tr><td>No change</td><td>31</td></tr><tr><td>Increase</td><td>19</td></tr><tr><td>Decrease</td><td>50</td></tr></table> |                                                                                                                                                                                                                                              | Pre-restrictions<br>(Median (IQR)) | Post-restrictions<br>(Median (IQR)) | p | <b>Females</b> | 120.0 (227.1) | 64.3 (75.0) | > 0.0001 | <b>Males</b> | 135.0 (127.5) | 85.7 (56.8) | 0.006 |  | Prevalence (%) | <b>Females</b> |  | No change | 25 | Increase | 19 | Decrease | 56 | <b>Males</b> |  | No change | 31 | Increase | 19 | Decrease | 50 | <b>Overall study quality:</b><br>High risk<br><b>Conflict of interest</b><br>Stated (none declared)<br><b>Funding:</b><br>Public funds<br><br>+ ethical approval from the Ethics Committee of the Faculty of Kinesiology of the University of Zagreb<br>+ stratified two-stage random sampling procedures (school level and class level) of the original study<br>+ validated outcome measurement for the investigation of the association between quarantine status and physical activity<br>+ using ANOVA to investigate differences<br>+ statistical analysis of confounders “sex” (by stratification and interaction analysis) and “age” (homogeneous group)<br><br>- low response |
|                                               | Pre-restrictions<br>(Median (IQR))                                                                                                                                                                                                                                                                                   | Post-restrictions<br>(Median (IQR))                                                                                                                                                                                                                                                                                                                                                       | p                                                                                                                                                                                                                                                                                                              |                                                                                                                                                                                                                                                                                                                                                                                |                                                                                                                                                                                                                                                                                                                                                                                                                                                                                                                                                                                                                                                                                                                                                                                                                                                                                                                                                         |                                                                                                                                                                                                                                              |                                    |                                     |   |                |               |             |          |              |               |             |       |  |                |                |  |           |    |          |    |          |    |              |  |           |    |          |    |          |    |                                                                                                                                                                                                                                                                                                                                                                                                                                                                                                                                                                                                                                                                                        |
| <b>Females</b>                                | 120.0 (227.1)                                                                                                                                                                                                                                                                                                        | 64.3 (75.0)                                                                                                                                                                                                                                                                                                                                                                               | > 0.0001                                                                                                                                                                                                                                                                                                       |                                                                                                                                                                                                                                                                                                                                                                                |                                                                                                                                                                                                                                                                                                                                                                                                                                                                                                                                                                                                                                                                                                                                                                                                                                                                                                                                                         |                                                                                                                                                                                                                                              |                                    |                                     |   |                |               |             |          |              |               |             |       |  |                |                |  |           |    |          |    |          |    |              |  |           |    |          |    |          |    |                                                                                                                                                                                                                                                                                                                                                                                                                                                                                                                                                                                                                                                                                        |
| <b>Males</b>                                  | 135.0 (127.5)                                                                                                                                                                                                                                                                                                        | 85.7 (56.8)                                                                                                                                                                                                                                                                                                                                                                               | 0.006                                                                                                                                                                                                                                                                                                          |                                                                                                                                                                                                                                                                                                                                                                                |                                                                                                                                                                                                                                                                                                                                                                                                                                                                                                                                                                                                                                                                                                                                                                                                                                                                                                                                                         |                                                                                                                                                                                                                                              |                                    |                                     |   |                |               |             |          |              |               |             |       |  |                |                |  |           |    |          |    |          |    |              |  |           |    |          |    |          |    |                                                                                                                                                                                                                                                                                                                                                                                                                                                                                                                                                                                                                                                                                        |
|                                               | Prevalence (%)                                                                                                                                                                                                                                                                                                       |                                                                                                                                                                                                                                                                                                                                                                                           |                                                                                                                                                                                                                                                                                                                |                                                                                                                                                                                                                                                                                                                                                                                |                                                                                                                                                                                                                                                                                                                                                                                                                                                                                                                                                                                                                                                                                                                                                                                                                                                                                                                                                         |                                                                                                                                                                                                                                              |                                    |                                     |   |                |               |             |          |              |               |             |       |  |                |                |  |           |    |          |    |          |    |              |  |           |    |          |    |          |    |                                                                                                                                                                                                                                                                                                                                                                                                                                                                                                                                                                                                                                                                                        |
| <b>Females</b>                                |                                                                                                                                                                                                                                                                                                                      |                                                                                                                                                                                                                                                                                                                                                                                           |                                                                                                                                                                                                                                                                                                                |                                                                                                                                                                                                                                                                                                                                                                                |                                                                                                                                                                                                                                                                                                                                                                                                                                                                                                                                                                                                                                                                                                                                                                                                                                                                                                                                                         |                                                                                                                                                                                                                                              |                                    |                                     |   |                |               |             |          |              |               |             |       |  |                |                |  |           |    |          |    |          |    |              |  |           |    |          |    |          |    |                                                                                                                                                                                                                                                                                                                                                                                                                                                                                                                                                                                                                                                                                        |
| No change                                     | 25                                                                                                                                                                                                                                                                                                                   |                                                                                                                                                                                                                                                                                                                                                                                           |                                                                                                                                                                                                                                                                                                                |                                                                                                                                                                                                                                                                                                                                                                                |                                                                                                                                                                                                                                                                                                                                                                                                                                                                                                                                                                                                                                                                                                                                                                                                                                                                                                                                                         |                                                                                                                                                                                                                                              |                                    |                                     |   |                |               |             |          |              |               |             |       |  |                |                |  |           |    |          |    |          |    |              |  |           |    |          |    |          |    |                                                                                                                                                                                                                                                                                                                                                                                                                                                                                                                                                                                                                                                                                        |
| Increase                                      | 19                                                                                                                                                                                                                                                                                                                   |                                                                                                                                                                                                                                                                                                                                                                                           |                                                                                                                                                                                                                                                                                                                |                                                                                                                                                                                                                                                                                                                                                                                |                                                                                                                                                                                                                                                                                                                                                                                                                                                                                                                                                                                                                                                                                                                                                                                                                                                                                                                                                         |                                                                                                                                                                                                                                              |                                    |                                     |   |                |               |             |          |              |               |             |       |  |                |                |  |           |    |          |    |          |    |              |  |           |    |          |    |          |    |                                                                                                                                                                                                                                                                                                                                                                                                                                                                                                                                                                                                                                                                                        |
| Decrease                                      | 56                                                                                                                                                                                                                                                                                                                   |                                                                                                                                                                                                                                                                                                                                                                                           |                                                                                                                                                                                                                                                                                                                |                                                                                                                                                                                                                                                                                                                                                                                |                                                                                                                                                                                                                                                                                                                                                                                                                                                                                                                                                                                                                                                                                                                                                                                                                                                                                                                                                         |                                                                                                                                                                                                                                              |                                    |                                     |   |                |               |             |          |              |               |             |       |  |                |                |  |           |    |          |    |          |    |              |  |           |    |          |    |          |    |                                                                                                                                                                                                                                                                                                                                                                                                                                                                                                                                                                                                                                                                                        |
| <b>Males</b>                                  |                                                                                                                                                                                                                                                                                                                      |                                                                                                                                                                                                                                                                                                                                                                                           |                                                                                                                                                                                                                                                                                                                |                                                                                                                                                                                                                                                                                                                                                                                |                                                                                                                                                                                                                                                                                                                                                                                                                                                                                                                                                                                                                                                                                                                                                                                                                                                                                                                                                         |                                                                                                                                                                                                                                              |                                    |                                     |   |                |               |             |          |              |               |             |       |  |                |                |  |           |    |          |    |          |    |              |  |           |    |          |    |          |    |                                                                                                                                                                                                                                                                                                                                                                                                                                                                                                                                                                                                                                                                                        |
| No change                                     | 31                                                                                                                                                                                                                                                                                                                   |                                                                                                                                                                                                                                                                                                                                                                                           |                                                                                                                                                                                                                                                                                                                |                                                                                                                                                                                                                                                                                                                                                                                |                                                                                                                                                                                                                                                                                                                                                                                                                                                                                                                                                                                                                                                                                                                                                                                                                                                                                                                                                         |                                                                                                                                                                                                                                              |                                    |                                     |   |                |               |             |          |              |               |             |       |  |                |                |  |           |    |          |    |          |    |              |  |           |    |          |    |          |    |                                                                                                                                                                                                                                                                                                                                                                                                                                                                                                                                                                                                                                                                                        |
| Increase                                      | 19                                                                                                                                                                                                                                                                                                                   |                                                                                                                                                                                                                                                                                                                                                                                           |                                                                                                                                                                                                                                                                                                                |                                                                                                                                                                                                                                                                                                                                                                                |                                                                                                                                                                                                                                                                                                                                                                                                                                                                                                                                                                                                                                                                                                                                                                                                                                                                                                                                                         |                                                                                                                                                                                                                                              |                                    |                                     |   |                |               |             |          |              |               |             |       |  |                |                |  |           |    |          |    |          |    |              |  |           |    |          |    |          |    |                                                                                                                                                                                                                                                                                                                                                                                                                                                                                                                                                                                                                                                                                        |
| Decrease                                      | 50                                                                                                                                                                                                                                                                                                                   |                                                                                                                                                                                                                                                                                                                                                                                           |                                                                                                                                                                                                                                                                                                                |                                                                                                                                                                                                                                                                                                                                                                                |                                                                                                                                                                                                                                                                                                                                                                                                                                                                                                                                                                                                                                                                                                                                                                                                                                                                                                                                                         |                                                                                                                                                                                                                                              |                                    |                                     |   |                |               |             |          |              |               |             |       |  |                |                |  |           |    |          |    |          |    |              |  |           |    |          |    |          |    |                                                                                                                                                                                                                                                                                                                                                                                                                                                                                                                                                                                                                                                                                        |

| Reference<br>(First author, publication year) | General<br>(Study design<br>Study name<br>Country of study<br>Time of study<br>No. of waves<br>Follow-up duration<br>(e.g., mean, range))                                                                                                                                                                                                                        | Population<br>(Description<br>Inclusion criteria<br># invited<br># baseline<br># follow-up<br>Age at baseline<br>% females<br>Response<br>Lost to follow-up)                                                                                                                                                                                                                                                                                                             | Exposure<br>(Description & assessment)                                                                                                                                                                                                                                                                                                                                                                                                                                                                                                                                                                             | Outcome<br>(Description & assessment)           | Results<br>(Description of all topically relevant results)                                                                                                                                                                                       | Comments<br>(study quality [overall assessment according to Iljaz/Shamliyan/SIGN/CASP]<br>Conflict of interest [stated vs. not stated]<br>Funding (public, non-profit, commercial)<br>Strengths (+) and weaknesses (-))                                                                                                                                           |               |                |               |              |               |                                                                                                                                                                                                                                                                                                                                                                                                                                                                                                                                                                                       |
|-----------------------------------------------|------------------------------------------------------------------------------------------------------------------------------------------------------------------------------------------------------------------------------------------------------------------------------------------------------------------------------------------------------------------|--------------------------------------------------------------------------------------------------------------------------------------------------------------------------------------------------------------------------------------------------------------------------------------------------------------------------------------------------------------------------------------------------------------------------------------------------------------------------|--------------------------------------------------------------------------------------------------------------------------------------------------------------------------------------------------------------------------------------------------------------------------------------------------------------------------------------------------------------------------------------------------------------------------------------------------------------------------------------------------------------------------------------------------------------------------------------------------------------------|-------------------------------------------------|--------------------------------------------------------------------------------------------------------------------------------------------------------------------------------------------------------------------------------------------------|-------------------------------------------------------------------------------------------------------------------------------------------------------------------------------------------------------------------------------------------------------------------------------------------------------------------------------------------------------------------|---------------|----------------|---------------|--------------|---------------|---------------------------------------------------------------------------------------------------------------------------------------------------------------------------------------------------------------------------------------------------------------------------------------------------------------------------------------------------------------------------------------------------------------------------------------------------------------------------------------------------------------------------------------------------------------------------------------|
|                                               |                                                                                                                                                                                                                                                                                                                                                                  |                                                                                                                                                                                                                                                                                                                                                                                                                                                                          |                                                                                                                                                                                                                                                                                                                                                                                                                                                                                                                                                                                                                    |                                                 |                                                                                                                                                                                                                                                  | - difference between responders and non-responders regarding age, sex, socio-economic status, and moderate-to-vigorous physical activity<br>- retrospective assessment of activity levels, before lockdown (recall bias)<br>- self-reported question for the outcome "change in physical activity"<br>- due to study design no actual chronological investigation |               |                |               |              |               |                                                                                                                                                                                                                                                                                                                                                                                                                                                                                                                                                                                       |
| Mason et al., 2020                            | <b>Study design:</b><br>Cohort study<br><b>Study name:</b><br>Happiness and Health prospective cohort study<br><b>Country of study:</b><br>United States<br><b>Time of study:</b><br>Baseline (wave 9): October 2018–October 2019<br>Follow-up (wave 10): May–July 2020<br><b>No. of waves:</b><br><i>n</i> = 2<br><b>Follow-up duration:</b><br>About 1.5 years | <b>Description:</b><br>Young adults<br><b>Inclusion criteria:</b><br>n.r.<br><b># invited:</b><br>Wave 1 (2013):<br><i>n</i> = 4,100<br>Wave 10 (2020):<br><i>n</i> = 2,548<br><b># baseline:</b><br>Baseline (wave 9): n.r.<br><b># follow-up:</b><br><i>n</i> = 1,820<br><b>Age at baseline:</b><br>M: 19.72 years (SD: 0.46)<br><b>% females:</b><br>61.5 %<br><b>Response:</b><br>Wave 1 (2013):<br>82.5 %<br>Wave 10 (2020):<br>71.4 %<br><b>Lost to follow-up:</b> | <b>COVID-19 restrictions:</b><br>- modified on May 4, 2020<br>- residents were still directed to stay at home except for essential needs<br>- but lower-risk businesses and spaces were allowed to reopen ("Stage two", May 4, 2020)<br>- counties could selectively reopen higher-risk businesses and spaces /"Stage three", May 18, 2020)<br>- air service businesses could reopen with restrictions (May 26, 2020)<br>- closure of most indoor businesses in many counties due to increase in cases (June and July 2020)<br>- closure of gyms, indoor dining, bars, movie theatres, and museums (July 13, 2020) | <b>Weight:</b><br>Self-reported single question | <b>Text: Descriptive statistics in weight change (pounds (lbs.)) since restrictions</b> <table><tr><td></td><td><b>M (SD)</b></td><td><b>M% (SD)</b></td></tr><tr><td>Weight change</td><td>3.47 (14.57)</td><td>2.5 % (8.6 %)</td></tr></table> |                                                                                                                                                                                                                                                                                                                                                                   | <b>M (SD)</b> | <b>M% (SD)</b> | Weight change | 3.47 (14.57) | 2.5 % (8.6 %) | <b>Overall study quality:</b><br>High risk<br><b>Conflict of interest</b><br>Stated (none declared)<br><b>Funding:</b><br>Public funds<br><br>+ ethical approval from the University of Southern California Institutional Review Board<br>+ complete sampling of participants in the original study (all 9 <sup>th</sup> grade students from 10 out of 40 invited public high schools which were chosen due to their diverse demographic characteristics and proximity)<br>+ high response<br>+ temporal investigation<br>+ consideration of the confounder "age" (homogeneous group) |
|                                               | <b>M (SD)</b>                                                                                                                                                                                                                                                                                                                                                    | <b>M% (SD)</b>                                                                                                                                                                                                                                                                                                                                                                                                                                                           |                                                                                                                                                                                                                                                                                                                                                                                                                                                                                                                                                                                                                    |                                                 |                                                                                                                                                                                                                                                  |                                                                                                                                                                                                                                                                                                                                                                   |               |                |               |              |               |                                                                                                                                                                                                                                                                                                                                                                                                                                                                                                                                                                                       |
| Weight change                                 | 3.47 (14.57)                                                                                                                                                                                                                                                                                                                                                     | 2.5 % (8.6 %)                                                                                                                                                                                                                                                                                                                                                                                                                                                            |                                                                                                                                                                                                                                                                                                                                                                                                                                                                                                                                                                                                                    |                                                 |                                                                                                                                                                                                                                                  |                                                                                                                                                                                                                                                                                                                                                                   |               |                |               |              |               |                                                                                                                                                                                                                                                                                                                                                                                                                                                                                                                                                                                       |

| Reference<br>(First author, publication year)   | General<br>(Study design<br>Study name<br>Country of study<br>Time of study<br>No. of waves<br>Follow-up duration<br>(e.g., mean, range))                                                                                                                                                                                                                                                            | Population<br>(Description<br>Inclusion criteria<br># invited<br># baseline<br># follow-up<br>Age at baseline<br>% females<br>Response<br>Lost to follow-up)                                                                                                                                                                                                                                                                                                                                                                                                                                                                               | Exposure<br>(Description & assessment)                                                                                                                                                                                                                                                                                                                                                                                                                                                                                                                                                                                                                                                                                                                                                                                                                          | Outcome<br>(Description & assessment)                                                                                                                                                                                                                                                                                                                                                                                                                                                                          | Results<br>(Description of all topically relevant results)                                                                                                                                                                                                                                                                                                                                                                                                                                                                                                                                                                                                                                                                                                                                                                                                                                                                                                                                                                                                                                                                                                            | Comments<br>(study quality [overall assessment according to Iljaz/Shamliyan/SIGN/CASP]<br>Conflict of interest [stated vs. not stated]<br>Funding (public, non-profit, commercial)<br>Strengths (+) and weaknesses (-)) |        |        |               |                       |  |  |  |    |                  |                  |                  |     |                  |                  |                  |                                                 |  |  |  |     |                  |                  |                  |     |                  |                  |               |                                              |  |  |  |     |                  |                   |                  |     |                  |                  |                  |  |                         |                         |                 |                  |                  |                                                                                                                                                                                                                                                                                                                                                                                                                                                                                                                                                                                                                                                                                                          |
|-------------------------------------------------|------------------------------------------------------------------------------------------------------------------------------------------------------------------------------------------------------------------------------------------------------------------------------------------------------------------------------------------------------------------------------------------------------|--------------------------------------------------------------------------------------------------------------------------------------------------------------------------------------------------------------------------------------------------------------------------------------------------------------------------------------------------------------------------------------------------------------------------------------------------------------------------------------------------------------------------------------------------------------------------------------------------------------------------------------------|-----------------------------------------------------------------------------------------------------------------------------------------------------------------------------------------------------------------------------------------------------------------------------------------------------------------------------------------------------------------------------------------------------------------------------------------------------------------------------------------------------------------------------------------------------------------------------------------------------------------------------------------------------------------------------------------------------------------------------------------------------------------------------------------------------------------------------------------------------------------|----------------------------------------------------------------------------------------------------------------------------------------------------------------------------------------------------------------------------------------------------------------------------------------------------------------------------------------------------------------------------------------------------------------------------------------------------------------------------------------------------------------|-----------------------------------------------------------------------------------------------------------------------------------------------------------------------------------------------------------------------------------------------------------------------------------------------------------------------------------------------------------------------------------------------------------------------------------------------------------------------------------------------------------------------------------------------------------------------------------------------------------------------------------------------------------------------------------------------------------------------------------------------------------------------------------------------------------------------------------------------------------------------------------------------------------------------------------------------------------------------------------------------------------------------------------------------------------------------------------------------------------------------------------------------------------------------|-------------------------------------------------------------------------------------------------------------------------------------------------------------------------------------------------------------------------|--------|--------|---------------|-----------------------|--|--|--|----|------------------|------------------|------------------|-----|------------------|------------------|------------------|-------------------------------------------------|--|--|--|-----|------------------|------------------|------------------|-----|------------------|------------------|---------------|----------------------------------------------|--|--|--|-----|------------------|-------------------|------------------|-----|------------------|------------------|------------------|--|-------------------------|-------------------------|-----------------|------------------|------------------|----------------------------------------------------------------------------------------------------------------------------------------------------------------------------------------------------------------------------------------------------------------------------------------------------------------------------------------------------------------------------------------------------------------------------------------------------------------------------------------------------------------------------------------------------------------------------------------------------------------------------------------------------------------------------------------------------------|
|                                                 |                                                                                                                                                                                                                                                                                                                                                                                                      | From wave 1 (2013) to wave 10 (2020): 55.6 %<br>From wave 9 to wave 10: n.r.                                                                                                                                                                                                                                                                                                                                                                                                                                                                                                                                                               | (Measures were researched on the internet)                                                                                                                                                                                                                                                                                                                                                                                                                                                                                                                                                                                                                                                                                                                                                                                                                      |                                                                                                                                                                                                                                                                                                                                                                                                                                                                                                                |                                                                                                                                                                                                                                                                                                                                                                                                                                                                                                                                                                                                                                                                                                                                                                                                                                                                                                                                                                                                                                                                                                                                                                       | - self-reported outcome measurement<br>- no consideration of the confounder "sex" in statistical analysis<br>- descriptive analysis only                                                                                |        |        |               |                       |  |  |  |    |                  |                  |                  |     |                  |                  |                  |                                                 |  |  |  |     |                  |                  |                  |     |                  |                  |               |                                              |  |  |  |     |                  |                   |                  |     |                  |                  |                  |  |                         |                         |                 |                  |                  |                                                                                                                                                                                                                                                                                                                                                                                                                                                                                                                                                                                                                                                                                                          |
| Niedzwiedz et al., 2020                         | <b>Study design:</b><br>Cohort study<br><b>Study name:</b><br>UK Household Longitudinal Study (also called "Understanding Society")<br><b>Country of study:</b><br>United Kingdom<br><b>Time of study:</b><br>2015–2020<br>Wave 7: 2015–2017<br>Wave 8: 2016–2018<br>Wave 9: 2017–2019<br>COVID-19 wave April 24–30, 2020<br><b>No. of waves:</b><br>n = 4<br><b>Follow-up duration:</b><br>Annually | <b>Description:</b><br>Adults<br><b>Inclusion criteria:</b><br>Data from persons who took part in all 4 waves, having complete data sets at all 4 waves, aged ≥ 16 years<br><b># invited:</b><br>n.r.<br><b># baseline:</b><br>n = 27,141 (wave 7)<br><b># follow-up:</b><br>n = 25,231 (wave 8)<br>n = 22,823 (wave 9)<br>n = 10,977 (COVID-19 wave)<br>(analysed: n = 9,748 (repeated measures for all relevant waves))<br><b>Age at baseline:</b><br>18–24 years: n = 3,009 (11.1 %)<br>25–44 years: n = 8,504 (30.7 %)<br>45–64 years: n = 9,766 (35.0 %)<br>≥ 65 years: n = 5,862 (23.2 %)<br><b>% females:</b><br>52.2 % (follow-up) | <b>COVID-19 lockdown in the UK:</b><br><b>March 12, 2020:</b><br>- all with symptoms of possible COVID-19 required to isolate for 7 days<br><b>March 16, 2020:</b><br>- all living with someone with symptoms of possible COVID19 required to isolate for 14 days<br>- all others advised against unnecessary social contact and travel<br>- mass gatherings banned<br><b>March 17, 2020:</b><br>- foreign and Commonwealth Office advises against all non-essential world-wide travel<br><b>March 20, 2020:</b><br>- entertainment, hospitality and indoor leisure premises ordered to close<br>- schools, colleges and nurseries close for all except children of key workers or children identified as vulnerable by social services<br><b>March 22, 2020:</b><br>- Those identified as being extremely clinically vulnerable (i.e. those at highest risk of | <b>Alcohol consumption:</b><br>Alcohol Use Disorder Identification Test for Consumption:<br>- binge drinking (≥ 6 drinks on a single occasion)<br>- alcohol frequency (≥ 4 times per week)<br>- heavy drinking (≥ 7 drinks on a typical drinking day)<br><b>Cigarette smoking:</b><br>2 self-reported single questions<br>- current smoker versus non-smoker<br>- number of cigarettes per day (< 10, 10–19, 20+ cigarettes)<br><b>E-Cigarette use:</b><br>1 single question (use of e-cigarettes once a week) | <b>Table S2: Descriptive statistics (in %)</b> <table><tr><th></th><th>Wave 7</th><th>Wave 9</th><th>COVID-19 wave</th></tr><tr><td colspan="4"><b>Binge drinking</b></td></tr><tr><td>No</td><td>88.5 (88.0–89.0)</td><td>89.2 (88.7–89.7)</td><td>83.8 (82.6–85.0)</td></tr><tr><td>Yes</td><td>11.5 (11.1–12.0)</td><td>10.8 (10.3–11.3)</td><td>16.2 (15.0–17.4)</td></tr><tr><td colspan="4"><b>Number of drinks on typical drinking day</b></td></tr><tr><td>0–4</td><td>86.7 (86.1–87.2)</td><td>86.4 (85.7–87.0)</td><td>94.5 (93.6–95.2)</td></tr><tr><td>≥ 5</td><td>13.3 (12.8–13.9)</td><td>13.6 (13.0–14.3)</td><td>5.6 (4.8–6.4)</td></tr><tr><td colspan="4"><b>Alcohol frequency (in times per week)</b></td></tr><tr><td>0–3</td><td>87.2 (86.6–87.7)</td><td>86.3 (85.7–86.9)]</td><td>78.0 (76.6–79.4)</td></tr><tr><td>≥ 4</td><td>12.8 (12.3–13.4)</td><td>13.7 (13.1–14.3)</td><td>22.0 (20.6–23.4)</td></tr></table><br><b>Table S5: Binge drinking</b> <table><tr><th></th><th>Model 1<br/>RR (95 % CI)</th><th>Model 2<br/>RR (95 % CI)</th></tr><tr><td>During Covid-19</td><td>1.18 (0.97–1.45)</td><td>1.27 (1.08–1.48)</td></tr></table> |                                                                                                                                                                                                                         | Wave 7 | Wave 9 | COVID-19 wave | <b>Binge drinking</b> |  |  |  | No | 88.5 (88.0–89.0) | 89.2 (88.7–89.7) | 83.8 (82.6–85.0) | Yes | 11.5 (11.1–12.0) | 10.8 (10.3–11.3) | 16.2 (15.0–17.4) | <b>Number of drinks on typical drinking day</b> |  |  |  | 0–4 | 86.7 (86.1–87.2) | 86.4 (85.7–87.0) | 94.5 (93.6–95.2) | ≥ 5 | 13.3 (12.8–13.9) | 13.6 (13.0–14.3) | 5.6 (4.8–6.4) | <b>Alcohol frequency (in times per week)</b> |  |  |  | 0–3 | 87.2 (86.6–87.7) | 86.3 (85.7–86.9)] | 78.0 (76.6–79.4) | ≥ 4 | 12.8 (12.3–13.4) | 13.7 (13.1–14.3) | 22.0 (20.6–23.4) |  | Model 1<br>RR (95 % CI) | Model 2<br>RR (95 % CI) | During Covid-19 | 1.18 (0.97–1.45) | 1.27 (1.08–1.48) | <b>Overall study quality:</b><br>Outcome "alcohol consumption": Low risk<br>Outcome "smoking": High risk<br><b>Conflict of interest</b><br>Stated (none declared)<br><b>Funding:</b><br>Public funds<br><br>+ ethical approval from University of Essex Ethics Committee<br>+ clustered stratified probability sample<br>+ large UK household survey<br>+ high response<br>+ validated outcome measurement for drinking behaviour<br>+ temporal investigation<br>+ regression analysis for the investigation of associations<br>+ statistical analysis of confounders "sex" and "age" (interaction analysis)<br><br>- high lost to follow-up (and no information on drop-outs)<br>- single questions for |
|                                                 | Wave 7                                                                                                                                                                                                                                                                                                                                                                                               | Wave 9                                                                                                                                                                                                                                                                                                                                                                                                                                                                                                                                                                                                                                     | COVID-19 wave                                                                                                                                                                                                                                                                                                                                                                                                                                                                                                                                                                                                                                                                                                                                                                                                                                                   |                                                                                                                                                                                                                                                                                                                                                                                                                                                                                                                |                                                                                                                                                                                                                                                                                                                                                                                                                                                                                                                                                                                                                                                                                                                                                                                                                                                                                                                                                                                                                                                                                                                                                                       |                                                                                                                                                                                                                         |        |        |               |                       |  |  |  |    |                  |                  |                  |     |                  |                  |                  |                                                 |  |  |  |     |                  |                  |                  |     |                  |                  |               |                                              |  |  |  |     |                  |                   |                  |     |                  |                  |                  |  |                         |                         |                 |                  |                  |                                                                                                                                                                                                                                                                                                                                                                                                                                                                                                                                                                                                                                                                                                          |
| <b>Binge drinking</b>                           |                                                                                                                                                                                                                                                                                                                                                                                                      |                                                                                                                                                                                                                                                                                                                                                                                                                                                                                                                                                                                                                                            |                                                                                                                                                                                                                                                                                                                                                                                                                                                                                                                                                                                                                                                                                                                                                                                                                                                                 |                                                                                                                                                                                                                                                                                                                                                                                                                                                                                                                |                                                                                                                                                                                                                                                                                                                                                                                                                                                                                                                                                                                                                                                                                                                                                                                                                                                                                                                                                                                                                                                                                                                                                                       |                                                                                                                                                                                                                         |        |        |               |                       |  |  |  |    |                  |                  |                  |     |                  |                  |                  |                                                 |  |  |  |     |                  |                  |                  |     |                  |                  |               |                                              |  |  |  |     |                  |                   |                  |     |                  |                  |                  |  |                         |                         |                 |                  |                  |                                                                                                                                                                                                                                                                                                                                                                                                                                                                                                                                                                                                                                                                                                          |
| No                                              | 88.5 (88.0–89.0)                                                                                                                                                                                                                                                                                                                                                                                     | 89.2 (88.7–89.7)                                                                                                                                                                                                                                                                                                                                                                                                                                                                                                                                                                                                                           | 83.8 (82.6–85.0)                                                                                                                                                                                                                                                                                                                                                                                                                                                                                                                                                                                                                                                                                                                                                                                                                                                |                                                                                                                                                                                                                                                                                                                                                                                                                                                                                                                |                                                                                                                                                                                                                                                                                                                                                                                                                                                                                                                                                                                                                                                                                                                                                                                                                                                                                                                                                                                                                                                                                                                                                                       |                                                                                                                                                                                                                         |        |        |               |                       |  |  |  |    |                  |                  |                  |     |                  |                  |                  |                                                 |  |  |  |     |                  |                  |                  |     |                  |                  |               |                                              |  |  |  |     |                  |                   |                  |     |                  |                  |                  |  |                         |                         |                 |                  |                  |                                                                                                                                                                                                                                                                                                                                                                                                                                                                                                                                                                                                                                                                                                          |
| Yes                                             | 11.5 (11.1–12.0)                                                                                                                                                                                                                                                                                                                                                                                     | 10.8 (10.3–11.3)                                                                                                                                                                                                                                                                                                                                                                                                                                                                                                                                                                                                                           | 16.2 (15.0–17.4)                                                                                                                                                                                                                                                                                                                                                                                                                                                                                                                                                                                                                                                                                                                                                                                                                                                |                                                                                                                                                                                                                                                                                                                                                                                                                                                                                                                |                                                                                                                                                                                                                                                                                                                                                                                                                                                                                                                                                                                                                                                                                                                                                                                                                                                                                                                                                                                                                                                                                                                                                                       |                                                                                                                                                                                                                         |        |        |               |                       |  |  |  |    |                  |                  |                  |     |                  |                  |                  |                                                 |  |  |  |     |                  |                  |                  |     |                  |                  |               |                                              |  |  |  |     |                  |                   |                  |     |                  |                  |                  |  |                         |                         |                 |                  |                  |                                                                                                                                                                                                                                                                                                                                                                                                                                                                                                                                                                                                                                                                                                          |
| <b>Number of drinks on typical drinking day</b> |                                                                                                                                                                                                                                                                                                                                                                                                      |                                                                                                                                                                                                                                                                                                                                                                                                                                                                                                                                                                                                                                            |                                                                                                                                                                                                                                                                                                                                                                                                                                                                                                                                                                                                                                                                                                                                                                                                                                                                 |                                                                                                                                                                                                                                                                                                                                                                                                                                                                                                                |                                                                                                                                                                                                                                                                                                                                                                                                                                                                                                                                                                                                                                                                                                                                                                                                                                                                                                                                                                                                                                                                                                                                                                       |                                                                                                                                                                                                                         |        |        |               |                       |  |  |  |    |                  |                  |                  |     |                  |                  |                  |                                                 |  |  |  |     |                  |                  |                  |     |                  |                  |               |                                              |  |  |  |     |                  |                   |                  |     |                  |                  |                  |  |                         |                         |                 |                  |                  |                                                                                                                                                                                                                                                                                                                                                                                                                                                                                                                                                                                                                                                                                                          |
| 0–4                                             | 86.7 (86.1–87.2)                                                                                                                                                                                                                                                                                                                                                                                     | 86.4 (85.7–87.0)                                                                                                                                                                                                                                                                                                                                                                                                                                                                                                                                                                                                                           | 94.5 (93.6–95.2)                                                                                                                                                                                                                                                                                                                                                                                                                                                                                                                                                                                                                                                                                                                                                                                                                                                |                                                                                                                                                                                                                                                                                                                                                                                                                                                                                                                |                                                                                                                                                                                                                                                                                                                                                                                                                                                                                                                                                                                                                                                                                                                                                                                                                                                                                                                                                                                                                                                                                                                                                                       |                                                                                                                                                                                                                         |        |        |               |                       |  |  |  |    |                  |                  |                  |     |                  |                  |                  |                                                 |  |  |  |     |                  |                  |                  |     |                  |                  |               |                                              |  |  |  |     |                  |                   |                  |     |                  |                  |                  |  |                         |                         |                 |                  |                  |                                                                                                                                                                                                                                                                                                                                                                                                                                                                                                                                                                                                                                                                                                          |
| ≥ 5                                             | 13.3 (12.8–13.9)                                                                                                                                                                                                                                                                                                                                                                                     | 13.6 (13.0–14.3)                                                                                                                                                                                                                                                                                                                                                                                                                                                                                                                                                                                                                           | 5.6 (4.8–6.4)                                                                                                                                                                                                                                                                                                                                                                                                                                                                                                                                                                                                                                                                                                                                                                                                                                                   |                                                                                                                                                                                                                                                                                                                                                                                                                                                                                                                |                                                                                                                                                                                                                                                                                                                                                                                                                                                                                                                                                                                                                                                                                                                                                                                                                                                                                                                                                                                                                                                                                                                                                                       |                                                                                                                                                                                                                         |        |        |               |                       |  |  |  |    |                  |                  |                  |     |                  |                  |                  |                                                 |  |  |  |     |                  |                  |                  |     |                  |                  |               |                                              |  |  |  |     |                  |                   |                  |     |                  |                  |                  |  |                         |                         |                 |                  |                  |                                                                                                                                                                                                                                                                                                                                                                                                                                                                                                                                                                                                                                                                                                          |
| <b>Alcohol frequency (in times per week)</b>    |                                                                                                                                                                                                                                                                                                                                                                                                      |                                                                                                                                                                                                                                                                                                                                                                                                                                                                                                                                                                                                                                            |                                                                                                                                                                                                                                                                                                                                                                                                                                                                                                                                                                                                                                                                                                                                                                                                                                                                 |                                                                                                                                                                                                                                                                                                                                                                                                                                                                                                                |                                                                                                                                                                                                                                                                                                                                                                                                                                                                                                                                                                                                                                                                                                                                                                                                                                                                                                                                                                                                                                                                                                                                                                       |                                                                                                                                                                                                                         |        |        |               |                       |  |  |  |    |                  |                  |                  |     |                  |                  |                  |                                                 |  |  |  |     |                  |                  |                  |     |                  |                  |               |                                              |  |  |  |     |                  |                   |                  |     |                  |                  |                  |  |                         |                         |                 |                  |                  |                                                                                                                                                                                                                                                                                                                                                                                                                                                                                                                                                                                                                                                                                                          |
| 0–3                                             | 87.2 (86.6–87.7)                                                                                                                                                                                                                                                                                                                                                                                     | 86.3 (85.7–86.9)]                                                                                                                                                                                                                                                                                                                                                                                                                                                                                                                                                                                                                          | 78.0 (76.6–79.4)                                                                                                                                                                                                                                                                                                                                                                                                                                                                                                                                                                                                                                                                                                                                                                                                                                                |                                                                                                                                                                                                                                                                                                                                                                                                                                                                                                                |                                                                                                                                                                                                                                                                                                                                                                                                                                                                                                                                                                                                                                                                                                                                                                                                                                                                                                                                                                                                                                                                                                                                                                       |                                                                                                                                                                                                                         |        |        |               |                       |  |  |  |    |                  |                  |                  |     |                  |                  |                  |                                                 |  |  |  |     |                  |                  |                  |     |                  |                  |               |                                              |  |  |  |     |                  |                   |                  |     |                  |                  |                  |  |                         |                         |                 |                  |                  |                                                                                                                                                                                                                                                                                                                                                                                                                                                                                                                                                                                                                                                                                                          |
| ≥ 4                                             | 12.8 (12.3–13.4)                                                                                                                                                                                                                                                                                                                                                                                     | 13.7 (13.1–14.3)                                                                                                                                                                                                                                                                                                                                                                                                                                                                                                                                                                                                                           | 22.0 (20.6–23.4)                                                                                                                                                                                                                                                                                                                                                                                                                                                                                                                                                                                                                                                                                                                                                                                                                                                |                                                                                                                                                                                                                                                                                                                                                                                                                                                                                                                |                                                                                                                                                                                                                                                                                                                                                                                                                                                                                                                                                                                                                                                                                                                                                                                                                                                                                                                                                                                                                                                                                                                                                                       |                                                                                                                                                                                                                         |        |        |               |                       |  |  |  |    |                  |                  |                  |     |                  |                  |                  |                                                 |  |  |  |     |                  |                  |                  |     |                  |                  |               |                                              |  |  |  |     |                  |                   |                  |     |                  |                  |                  |  |                         |                         |                 |                  |                  |                                                                                                                                                                                                                                                                                                                                                                                                                                                                                                                                                                                                                                                                                                          |
|                                                 | Model 1<br>RR (95 % CI)                                                                                                                                                                                                                                                                                                                                                                              | Model 2<br>RR (95 % CI)                                                                                                                                                                                                                                                                                                                                                                                                                                                                                                                                                                                                                    |                                                                                                                                                                                                                                                                                                                                                                                                                                                                                                                                                                                                                                                                                                                                                                                                                                                                 |                                                                                                                                                                                                                                                                                                                                                                                                                                                                                                                |                                                                                                                                                                                                                                                                                                                                                                                                                                                                                                                                                                                                                                                                                                                                                                                                                                                                                                                                                                                                                                                                                                                                                                       |                                                                                                                                                                                                                         |        |        |               |                       |  |  |  |    |                  |                  |                  |     |                  |                  |                  |                                                 |  |  |  |     |                  |                  |                  |     |                  |                  |               |                                              |  |  |  |     |                  |                   |                  |     |                  |                  |                  |  |                         |                         |                 |                  |                  |                                                                                                                                                                                                                                                                                                                                                                                                                                                                                                                                                                                                                                                                                                          |
| During Covid-19                                 | 1.18 (0.97–1.45)                                                                                                                                                                                                                                                                                                                                                                                     | 1.27 (1.08–1.48)                                                                                                                                                                                                                                                                                                                                                                                                                                                                                                                                                                                                                           |                                                                                                                                                                                                                                                                                                                                                                                                                                                                                                                                                                                                                                                                                                                                                                                                                                                                 |                                                                                                                                                                                                                                                                                                                                                                                                                                                                                                                |                                                                                                                                                                                                                                                                                                                                                                                                                                                                                                                                                                                                                                                                                                                                                                                                                                                                                                                                                                                                                                                                                                                                                                       |                                                                                                                                                                                                                         |        |        |               |                       |  |  |  |    |                  |                  |                  |     |                  |                  |                  |                                                 |  |  |  |     |                  |                  |                  |     |                  |                  |               |                                              |  |  |  |     |                  |                   |                  |     |                  |                  |                  |  |                         |                         |                 |                  |                  |                                                                                                                                                                                                                                                                                                                                                                                                                                                                                                                                                                                                                                                                                                          |

| Reference<br>(First author, publication year)                              | General<br>(Study design<br>Study name<br>Country of study<br>Time of study<br>No. of waves<br>Follow-up duration<br>(e.g., mean, range)) | Population<br>(Description<br>Inclusion criteria<br># invited<br># baseline<br># follow-up<br>Age at baseline<br>% females<br>Response<br>Lost to follow-up)                                        | Exposure<br>(Description & assessment)                                                                                                                                                                                                                                                                                                                                                                                                                                                                                                                                                                                                                                                                                                                                                                                                   | Outcome<br>(Description & assessment) | Results<br>(Description of all topically relevant results)                                                                                                                                                                                                                                                                                                                                                                                                                                                                                                                                                                                                                                                                                                                                                                                                                                                                                                                                                                                                                                                                                                                                                                                                                                                                                                                                                                                                                                                                                                                                                                                                                                                                                                                                                                                                                                                       | Comments<br>(study quality [overall assessment according to Iijaz/Shamliyan/SIGN/CASP]<br>Conflict of interest [stated vs. not stated]<br>Funding (public, non-profit, commercial)<br>Strengths (+) and weaknesses (-)) |  |  |       |                  |  |       |                  |  |       |                  |  |                                                                          |  |  |        |  |                  |  |                                |                                |                 |                  |                  |                                                                            |  |  |       |                  |  |       |                  |  |       |                  |  |                                                                          |  |  |        |  |                  |  |                                |                                |                 |                  |                  |                                                                            |  |  |       |                  |  |       |                  |  |       |                  |  |                                                                          |  |  |  |
|----------------------------------------------------------------------------|-------------------------------------------------------------------------------------------------------------------------------------------|-----------------------------------------------------------------------------------------------------------------------------------------------------------------------------------------------------|------------------------------------------------------------------------------------------------------------------------------------------------------------------------------------------------------------------------------------------------------------------------------------------------------------------------------------------------------------------------------------------------------------------------------------------------------------------------------------------------------------------------------------------------------------------------------------------------------------------------------------------------------------------------------------------------------------------------------------------------------------------------------------------------------------------------------------------|---------------------------------------|------------------------------------------------------------------------------------------------------------------------------------------------------------------------------------------------------------------------------------------------------------------------------------------------------------------------------------------------------------------------------------------------------------------------------------------------------------------------------------------------------------------------------------------------------------------------------------------------------------------------------------------------------------------------------------------------------------------------------------------------------------------------------------------------------------------------------------------------------------------------------------------------------------------------------------------------------------------------------------------------------------------------------------------------------------------------------------------------------------------------------------------------------------------------------------------------------------------------------------------------------------------------------------------------------------------------------------------------------------------------------------------------------------------------------------------------------------------------------------------------------------------------------------------------------------------------------------------------------------------------------------------------------------------------------------------------------------------------------------------------------------------------------------------------------------------------------------------------------------------------------------------------------------------|-------------------------------------------------------------------------------------------------------------------------------------------------------------------------------------------------------------------------|--|--|-------|------------------|--|-------|------------------|--|-------|------------------|--|--------------------------------------------------------------------------|--|--|--------|--|------------------|--|--------------------------------|--------------------------------|-----------------|------------------|------------------|----------------------------------------------------------------------------|--|--|-------|------------------|--|-------|------------------|--|-------|------------------|--|--------------------------------------------------------------------------|--|--|--------|--|------------------|--|--------------------------------|--------------------------------|-----------------|------------------|------------------|----------------------------------------------------------------------------|--|--|-------|------------------|--|-------|------------------|--|-------|------------------|--|--------------------------------------------------------------------------|--|--|--|
|                                                                            |                                                                                                                                           | <p><b>Response:</b><br/>Household response waves 7–9: 81–84 %<br/>COVID-19 wave (of those who took part in wave 9): 48.6 %</p> <p><b>Lost to follow-up:</b><br/>Wave 7 to COVID-19 wave: 59.6 %</p> | <p>severe illness if they contract COVID-19) advised to begin 'shielding' – they should not leave their house for any reason, necessary food/ supplies will be provided by Local Authorities where needed</p> <p><b>March 23, 2020:</b><br/>- hole population not permitted to leave home except for very limited purposes (to buy food; to exercise once per day; for any medical need; to care for a vulnerable person; to travel to/from essential work)<br/>- all gatherings of more than two people in public banned<br/>- lockdown measures to be reviewed every 3 weeks</p> <p><b>March 27, 2020:</b><br/>- public advised to only use open spaces near own house for exercise, and to stay at least 2metres apart from other households while outdoors</p> <p><b>April:</b><br/>- no significant change to lockdown measures</p> |                                       | <table><tr><td colspan="3"><b>Age group interaction with period</b> (Pre-COVID-19 is ref, 65+ is ref)</td></tr><tr><td>18–24</td><td>1.06 (0.77–1.46)</td><td></td></tr><tr><td>25–44</td><td>1.64 (1.35–1.98)</td><td></td></tr><tr><td>45–64</td><td>1.16 (0.98–1.37)</td><td></td></tr><tr><td colspan="3"><b>Gender interaction with period</b> (Pre-COVID-19 is ref, male is ref)</td></tr><tr><td>Female</td><td></td><td>1.49 (1.31–1.69)</td></tr></table> <p><b>Table S6: Alcohol frequency (drinking 4+ days per week)</b></p> <table><tr><td></td><td><b>Model 1</b><br/>RR (95 % CI)</td><td><b>Model 2</b><br/>RR (95 % CI)</td></tr><tr><td>During Covid-19</td><td>1.06 (0.96–1.17)</td><td>1.23 (1.11–1.35)</td></tr></table> <table><tr><td colspan="3"><b>Age group interaction with period</b> (Pre-COVID-19 is ref, 65+ is ref)</td></tr><tr><td>18–24</td><td>2.90 (1.63–5.15)</td><td></td></tr><tr><td>25–44</td><td>1.91 (1.66–2.20)</td><td></td></tr><tr><td>45–64</td><td>1.25 (1.15–1.35)</td><td></td></tr><tr><td colspan="3"><b>Gender interaction with period</b> (Pre-COVID-19 is ref, male is ref)</td></tr><tr><td>Female</td><td></td><td>1.34 (1.23–1.47)</td></tr></table> <p><b>Table S7: Heavy drinking (5+ drinks on a typical day when drinking)</b></p> <table><tr><td></td><td><b>Model 1</b><br/>RR (95 % CI)</td><td><b>Model 2</b><br/>RR (95 % CI)</td></tr><tr><td>During Covid-19</td><td>0.60 (0.42–0.86)</td><td>0.46 (0.38–0.55)</td></tr></table> <table><tr><td colspan="3"><b>Age group interaction with period</b> (Pre-COVID-19 is ref, 65+ is ref)</td></tr><tr><td>18–24</td><td>0.37 (0.22–0.63)</td><td></td></tr><tr><td>25–44</td><td>0.68 (0.47–0.99)</td><td></td></tr><tr><td>45–64</td><td>0.86 (0.60–1.23)</td><td></td></tr><tr><td colspan="3"><b>Gender interaction with period</b> (Pre-COVID-19 is ref, male is ref)</td></tr></table> | <b>Age group interaction with period</b> (Pre-COVID-19 is ref, 65+ is ref)                                                                                                                                              |  |  | 18–24 | 1.06 (0.77–1.46) |  | 25–44 | 1.64 (1.35–1.98) |  | 45–64 | 1.16 (0.98–1.37) |  | <b>Gender interaction with period</b> (Pre-COVID-19 is ref, male is ref) |  |  | Female |  | 1.49 (1.31–1.69) |  | <b>Model 1</b><br>RR (95 % CI) | <b>Model 2</b><br>RR (95 % CI) | During Covid-19 | 1.06 (0.96–1.17) | 1.23 (1.11–1.35) | <b>Age group interaction with period</b> (Pre-COVID-19 is ref, 65+ is ref) |  |  | 18–24 | 2.90 (1.63–5.15) |  | 25–44 | 1.91 (1.66–2.20) |  | 45–64 | 1.25 (1.15–1.35) |  | <b>Gender interaction with period</b> (Pre-COVID-19 is ref, male is ref) |  |  | Female |  | 1.34 (1.23–1.47) |  | <b>Model 1</b><br>RR (95 % CI) | <b>Model 2</b><br>RR (95 % CI) | During Covid-19 | 0.60 (0.42–0.86) | 0.46 (0.38–0.55) | <b>Age group interaction with period</b> (Pre-COVID-19 is ref, 65+ is ref) |  |  | 18–24 | 0.37 (0.22–0.63) |  | 25–44 | 0.68 (0.47–0.99) |  | 45–64 | 0.86 (0.60–1.23) |  | <b>Gender interaction with period</b> (Pre-COVID-19 is ref, male is ref) |  |  |  |
| <b>Age group interaction with period</b> (Pre-COVID-19 is ref, 65+ is ref) |                                                                                                                                           |                                                                                                                                                                                                     |                                                                                                                                                                                                                                                                                                                                                                                                                                                                                                                                                                                                                                                                                                                                                                                                                                          |                                       |                                                                                                                                                                                                                                                                                                                                                                                                                                                                                                                                                                                                                                                                                                                                                                                                                                                                                                                                                                                                                                                                                                                                                                                                                                                                                                                                                                                                                                                                                                                                                                                                                                                                                                                                                                                                                                                                                                                  |                                                                                                                                                                                                                         |  |  |       |                  |  |       |                  |  |       |                  |  |                                                                          |  |  |        |  |                  |  |                                |                                |                 |                  |                  |                                                                            |  |  |       |                  |  |       |                  |  |       |                  |  |                                                                          |  |  |        |  |                  |  |                                |                                |                 |                  |                  |                                                                            |  |  |       |                  |  |       |                  |  |       |                  |  |                                                                          |  |  |  |
| 18–24                                                                      | 1.06 (0.77–1.46)                                                                                                                          |                                                                                                                                                                                                     |                                                                                                                                                                                                                                                                                                                                                                                                                                                                                                                                                                                                                                                                                                                                                                                                                                          |                                       |                                                                                                                                                                                                                                                                                                                                                                                                                                                                                                                                                                                                                                                                                                                                                                                                                                                                                                                                                                                                                                                                                                                                                                                                                                                                                                                                                                                                                                                                                                                                                                                                                                                                                                                                                                                                                                                                                                                  |                                                                                                                                                                                                                         |  |  |       |                  |  |       |                  |  |       |                  |  |                                                                          |  |  |        |  |                  |  |                                |                                |                 |                  |                  |                                                                            |  |  |       |                  |  |       |                  |  |       |                  |  |                                                                          |  |  |        |  |                  |  |                                |                                |                 |                  |                  |                                                                            |  |  |       |                  |  |       |                  |  |       |                  |  |                                                                          |  |  |  |
| 25–44                                                                      | 1.64 (1.35–1.98)                                                                                                                          |                                                                                                                                                                                                     |                                                                                                                                                                                                                                                                                                                                                                                                                                                                                                                                                                                                                                                                                                                                                                                                                                          |                                       |                                                                                                                                                                                                                                                                                                                                                                                                                                                                                                                                                                                                                                                                                                                                                                                                                                                                                                                                                                                                                                                                                                                                                                                                                                                                                                                                                                                                                                                                                                                                                                                                                                                                                                                                                                                                                                                                                                                  |                                                                                                                                                                                                                         |  |  |       |                  |  |       |                  |  |       |                  |  |                                                                          |  |  |        |  |                  |  |                                |                                |                 |                  |                  |                                                                            |  |  |       |                  |  |       |                  |  |       |                  |  |                                                                          |  |  |        |  |                  |  |                                |                                |                 |                  |                  |                                                                            |  |  |       |                  |  |       |                  |  |       |                  |  |                                                                          |  |  |  |
| 45–64                                                                      | 1.16 (0.98–1.37)                                                                                                                          |                                                                                                                                                                                                     |                                                                                                                                                                                                                                                                                                                                                                                                                                                                                                                                                                                                                                                                                                                                                                                                                                          |                                       |                                                                                                                                                                                                                                                                                                                                                                                                                                                                                                                                                                                                                                                                                                                                                                                                                                                                                                                                                                                                                                                                                                                                                                                                                                                                                                                                                                                                                                                                                                                                                                                                                                                                                                                                                                                                                                                                                                                  |                                                                                                                                                                                                                         |  |  |       |                  |  |       |                  |  |       |                  |  |                                                                          |  |  |        |  |                  |  |                                |                                |                 |                  |                  |                                                                            |  |  |       |                  |  |       |                  |  |       |                  |  |                                                                          |  |  |        |  |                  |  |                                |                                |                 |                  |                  |                                                                            |  |  |       |                  |  |       |                  |  |       |                  |  |                                                                          |  |  |  |
| <b>Gender interaction with period</b> (Pre-COVID-19 is ref, male is ref)   |                                                                                                                                           |                                                                                                                                                                                                     |                                                                                                                                                                                                                                                                                                                                                                                                                                                                                                                                                                                                                                                                                                                                                                                                                                          |                                       |                                                                                                                                                                                                                                                                                                                                                                                                                                                                                                                                                                                                                                                                                                                                                                                                                                                                                                                                                                                                                                                                                                                                                                                                                                                                                                                                                                                                                                                                                                                                                                                                                                                                                                                                                                                                                                                                                                                  |                                                                                                                                                                                                                         |  |  |       |                  |  |       |                  |  |       |                  |  |                                                                          |  |  |        |  |                  |  |                                |                                |                 |                  |                  |                                                                            |  |  |       |                  |  |       |                  |  |       |                  |  |                                                                          |  |  |        |  |                  |  |                                |                                |                 |                  |                  |                                                                            |  |  |       |                  |  |       |                  |  |       |                  |  |                                                                          |  |  |  |
| Female                                                                     |                                                                                                                                           | 1.49 (1.31–1.69)                                                                                                                                                                                    |                                                                                                                                                                                                                                                                                                                                                                                                                                                                                                                                                                                                                                                                                                                                                                                                                                          |                                       |                                                                                                                                                                                                                                                                                                                                                                                                                                                                                                                                                                                                                                                                                                                                                                                                                                                                                                                                                                                                                                                                                                                                                                                                                                                                                                                                                                                                                                                                                                                                                                                                                                                                                                                                                                                                                                                                                                                  |                                                                                                                                                                                                                         |  |  |       |                  |  |       |                  |  |       |                  |  |                                                                          |  |  |        |  |                  |  |                                |                                |                 |                  |                  |                                                                            |  |  |       |                  |  |       |                  |  |       |                  |  |                                                                          |  |  |        |  |                  |  |                                |                                |                 |                  |                  |                                                                            |  |  |       |                  |  |       |                  |  |       |                  |  |                                                                          |  |  |  |
|                                                                            | <b>Model 1</b><br>RR (95 % CI)                                                                                                            | <b>Model 2</b><br>RR (95 % CI)                                                                                                                                                                      |                                                                                                                                                                                                                                                                                                                                                                                                                                                                                                                                                                                                                                                                                                                                                                                                                                          |                                       |                                                                                                                                                                                                                                                                                                                                                                                                                                                                                                                                                                                                                                                                                                                                                                                                                                                                                                                                                                                                                                                                                                                                                                                                                                                                                                                                                                                                                                                                                                                                                                                                                                                                                                                                                                                                                                                                                                                  |                                                                                                                                                                                                                         |  |  |       |                  |  |       |                  |  |       |                  |  |                                                                          |  |  |        |  |                  |  |                                |                                |                 |                  |                  |                                                                            |  |  |       |                  |  |       |                  |  |       |                  |  |                                                                          |  |  |        |  |                  |  |                                |                                |                 |                  |                  |                                                                            |  |  |       |                  |  |       |                  |  |       |                  |  |                                                                          |  |  |  |
| During Covid-19                                                            | 1.06 (0.96–1.17)                                                                                                                          | 1.23 (1.11–1.35)                                                                                                                                                                                    |                                                                                                                                                                                                                                                                                                                                                                                                                                                                                                                                                                                                                                                                                                                                                                                                                                          |                                       |                                                                                                                                                                                                                                                                                                                                                                                                                                                                                                                                                                                                                                                                                                                                                                                                                                                                                                                                                                                                                                                                                                                                                                                                                                                                                                                                                                                                                                                                                                                                                                                                                                                                                                                                                                                                                                                                                                                  |                                                                                                                                                                                                                         |  |  |       |                  |  |       |                  |  |       |                  |  |                                                                          |  |  |        |  |                  |  |                                |                                |                 |                  |                  |                                                                            |  |  |       |                  |  |       |                  |  |       |                  |  |                                                                          |  |  |        |  |                  |  |                                |                                |                 |                  |                  |                                                                            |  |  |       |                  |  |       |                  |  |       |                  |  |                                                                          |  |  |  |
| <b>Age group interaction with period</b> (Pre-COVID-19 is ref, 65+ is ref) |                                                                                                                                           |                                                                                                                                                                                                     |                                                                                                                                                                                                                                                                                                                                                                                                                                                                                                                                                                                                                                                                                                                                                                                                                                          |                                       |                                                                                                                                                                                                                                                                                                                                                                                                                                                                                                                                                                                                                                                                                                                                                                                                                                                                                                                                                                                                                                                                                                                                                                                                                                                                                                                                                                                                                                                                                                                                                                                                                                                                                                                                                                                                                                                                                                                  |                                                                                                                                                                                                                         |  |  |       |                  |  |       |                  |  |       |                  |  |                                                                          |  |  |        |  |                  |  |                                |                                |                 |                  |                  |                                                                            |  |  |       |                  |  |       |                  |  |       |                  |  |                                                                          |  |  |        |  |                  |  |                                |                                |                 |                  |                  |                                                                            |  |  |       |                  |  |       |                  |  |       |                  |  |                                                                          |  |  |  |
| 18–24                                                                      | 2.90 (1.63–5.15)                                                                                                                          |                                                                                                                                                                                                     |                                                                                                                                                                                                                                                                                                                                                                                                                                                                                                                                                                                                                                                                                                                                                                                                                                          |                                       |                                                                                                                                                                                                                                                                                                                                                                                                                                                                                                                                                                                                                                                                                                                                                                                                                                                                                                                                                                                                                                                                                                                                                                                                                                                                                                                                                                                                                                                                                                                                                                                                                                                                                                                                                                                                                                                                                                                  |                                                                                                                                                                                                                         |  |  |       |                  |  |       |                  |  |       |                  |  |                                                                          |  |  |        |  |                  |  |                                |                                |                 |                  |                  |                                                                            |  |  |       |                  |  |       |                  |  |       |                  |  |                                                                          |  |  |        |  |                  |  |                                |                                |                 |                  |                  |                                                                            |  |  |       |                  |  |       |                  |  |       |                  |  |                                                                          |  |  |  |
| 25–44                                                                      | 1.91 (1.66–2.20)                                                                                                                          |                                                                                                                                                                                                     |                                                                                                                                                                                                                                                                                                                                                                                                                                                                                                                                                                                                                                                                                                                                                                                                                                          |                                       |                                                                                                                                                                                                                                                                                                                                                                                                                                                                                                                                                                                                                                                                                                                                                                                                                                                                                                                                                                                                                                                                                                                                                                                                                                                                                                                                                                                                                                                                                                                                                                                                                                                                                                                                                                                                                                                                                                                  |                                                                                                                                                                                                                         |  |  |       |                  |  |       |                  |  |       |                  |  |                                                                          |  |  |        |  |                  |  |                                |                                |                 |                  |                  |                                                                            |  |  |       |                  |  |       |                  |  |       |                  |  |                                                                          |  |  |        |  |                  |  |                                |                                |                 |                  |                  |                                                                            |  |  |       |                  |  |       |                  |  |       |                  |  |                                                                          |  |  |  |
| 45–64                                                                      | 1.25 (1.15–1.35)                                                                                                                          |                                                                                                                                                                                                     |                                                                                                                                                                                                                                                                                                                                                                                                                                                                                                                                                                                                                                                                                                                                                                                                                                          |                                       |                                                                                                                                                                                                                                                                                                                                                                                                                                                                                                                                                                                                                                                                                                                                                                                                                                                                                                                                                                                                                                                                                                                                                                                                                                                                                                                                                                                                                                                                                                                                                                                                                                                                                                                                                                                                                                                                                                                  |                                                                                                                                                                                                                         |  |  |       |                  |  |       |                  |  |       |                  |  |                                                                          |  |  |        |  |                  |  |                                |                                |                 |                  |                  |                                                                            |  |  |       |                  |  |       |                  |  |       |                  |  |                                                                          |  |  |        |  |                  |  |                                |                                |                 |                  |                  |                                                                            |  |  |       |                  |  |       |                  |  |       |                  |  |                                                                          |  |  |  |
| <b>Gender interaction with period</b> (Pre-COVID-19 is ref, male is ref)   |                                                                                                                                           |                                                                                                                                                                                                     |                                                                                                                                                                                                                                                                                                                                                                                                                                                                                                                                                                                                                                                                                                                                                                                                                                          |                                       |                                                                                                                                                                                                                                                                                                                                                                                                                                                                                                                                                                                                                                                                                                                                                                                                                                                                                                                                                                                                                                                                                                                                                                                                                                                                                                                                                                                                                                                                                                                                                                                                                                                                                                                                                                                                                                                                                                                  |                                                                                                                                                                                                                         |  |  |       |                  |  |       |                  |  |       |                  |  |                                                                          |  |  |        |  |                  |  |                                |                                |                 |                  |                  |                                                                            |  |  |       |                  |  |       |                  |  |       |                  |  |                                                                          |  |  |        |  |                  |  |                                |                                |                 |                  |                  |                                                                            |  |  |       |                  |  |       |                  |  |       |                  |  |                                                                          |  |  |  |
| Female                                                                     |                                                                                                                                           | 1.34 (1.23–1.47)                                                                                                                                                                                    |                                                                                                                                                                                                                                                                                                                                                                                                                                                                                                                                                                                                                                                                                                                                                                                                                                          |                                       |                                                                                                                                                                                                                                                                                                                                                                                                                                                                                                                                                                                                                                                                                                                                                                                                                                                                                                                                                                                                                                                                                                                                                                                                                                                                                                                                                                                                                                                                                                                                                                                                                                                                                                                                                                                                                                                                                                                  |                                                                                                                                                                                                                         |  |  |       |                  |  |       |                  |  |       |                  |  |                                                                          |  |  |        |  |                  |  |                                |                                |                 |                  |                  |                                                                            |  |  |       |                  |  |       |                  |  |       |                  |  |                                                                          |  |  |        |  |                  |  |                                |                                |                 |                  |                  |                                                                            |  |  |       |                  |  |       |                  |  |       |                  |  |                                                                          |  |  |  |
|                                                                            | <b>Model 1</b><br>RR (95 % CI)                                                                                                            | <b>Model 2</b><br>RR (95 % CI)                                                                                                                                                                      |                                                                                                                                                                                                                                                                                                                                                                                                                                                                                                                                                                                                                                                                                                                                                                                                                                          |                                       |                                                                                                                                                                                                                                                                                                                                                                                                                                                                                                                                                                                                                                                                                                                                                                                                                                                                                                                                                                                                                                                                                                                                                                                                                                                                                                                                                                                                                                                                                                                                                                                                                                                                                                                                                                                                                                                                                                                  |                                                                                                                                                                                                                         |  |  |       |                  |  |       |                  |  |       |                  |  |                                                                          |  |  |        |  |                  |  |                                |                                |                 |                  |                  |                                                                            |  |  |       |                  |  |       |                  |  |       |                  |  |                                                                          |  |  |        |  |                  |  |                                |                                |                 |                  |                  |                                                                            |  |  |       |                  |  |       |                  |  |       |                  |  |                                                                          |  |  |  |
| During Covid-19                                                            | 0.60 (0.42–0.86)                                                                                                                          | 0.46 (0.38–0.55)                                                                                                                                                                                    |                                                                                                                                                                                                                                                                                                                                                                                                                                                                                                                                                                                                                                                                                                                                                                                                                                          |                                       |                                                                                                                                                                                                                                                                                                                                                                                                                                                                                                                                                                                                                                                                                                                                                                                                                                                                                                                                                                                                                                                                                                                                                                                                                                                                                                                                                                                                                                                                                                                                                                                                                                                                                                                                                                                                                                                                                                                  |                                                                                                                                                                                                                         |  |  |       |                  |  |       |                  |  |       |                  |  |                                                                          |  |  |        |  |                  |  |                                |                                |                 |                  |                  |                                                                            |  |  |       |                  |  |       |                  |  |       |                  |  |                                                                          |  |  |        |  |                  |  |                                |                                |                 |                  |                  |                                                                            |  |  |       |                  |  |       |                  |  |       |                  |  |                                                                          |  |  |  |
| <b>Age group interaction with period</b> (Pre-COVID-19 is ref, 65+ is ref) |                                                                                                                                           |                                                                                                                                                                                                     |                                                                                                                                                                                                                                                                                                                                                                                                                                                                                                                                                                                                                                                                                                                                                                                                                                          |                                       |                                                                                                                                                                                                                                                                                                                                                                                                                                                                                                                                                                                                                                                                                                                                                                                                                                                                                                                                                                                                                                                                                                                                                                                                                                                                                                                                                                                                                                                                                                                                                                                                                                                                                                                                                                                                                                                                                                                  |                                                                                                                                                                                                                         |  |  |       |                  |  |       |                  |  |       |                  |  |                                                                          |  |  |        |  |                  |  |                                |                                |                 |                  |                  |                                                                            |  |  |       |                  |  |       |                  |  |       |                  |  |                                                                          |  |  |        |  |                  |  |                                |                                |                 |                  |                  |                                                                            |  |  |       |                  |  |       |                  |  |       |                  |  |                                                                          |  |  |  |
| 18–24                                                                      | 0.37 (0.22–0.63)                                                                                                                          |                                                                                                                                                                                                     |                                                                                                                                                                                                                                                                                                                                                                                                                                                                                                                                                                                                                                                                                                                                                                                                                                          |                                       |                                                                                                                                                                                                                                                                                                                                                                                                                                                                                                                                                                                                                                                                                                                                                                                                                                                                                                                                                                                                                                                                                                                                                                                                                                                                                                                                                                                                                                                                                                                                                                                                                                                                                                                                                                                                                                                                                                                  |                                                                                                                                                                                                                         |  |  |       |                  |  |       |                  |  |       |                  |  |                                                                          |  |  |        |  |                  |  |                                |                                |                 |                  |                  |                                                                            |  |  |       |                  |  |       |                  |  |       |                  |  |                                                                          |  |  |        |  |                  |  |                                |                                |                 |                  |                  |                                                                            |  |  |       |                  |  |       |                  |  |       |                  |  |                                                                          |  |  |  |
| 25–44                                                                      | 0.68 (0.47–0.99)                                                                                                                          |                                                                                                                                                                                                     |                                                                                                                                                                                                                                                                                                                                                                                                                                                                                                                                                                                                                                                                                                                                                                                                                                          |                                       |                                                                                                                                                                                                                                                                                                                                                                                                                                                                                                                                                                                                                                                                                                                                                                                                                                                                                                                                                                                                                                                                                                                                                                                                                                                                                                                                                                                                                                                                                                                                                                                                                                                                                                                                                                                                                                                                                                                  |                                                                                                                                                                                                                         |  |  |       |                  |  |       |                  |  |       |                  |  |                                                                          |  |  |        |  |                  |  |                                |                                |                 |                  |                  |                                                                            |  |  |       |                  |  |       |                  |  |       |                  |  |                                                                          |  |  |        |  |                  |  |                                |                                |                 |                  |                  |                                                                            |  |  |       |                  |  |       |                  |  |       |                  |  |                                                                          |  |  |  |
| 45–64                                                                      | 0.86 (0.60–1.23)                                                                                                                          |                                                                                                                                                                                                     |                                                                                                                                                                                                                                                                                                                                                                                                                                                                                                                                                                                                                                                                                                                                                                                                                                          |                                       |                                                                                                                                                                                                                                                                                                                                                                                                                                                                                                                                                                                                                                                                                                                                                                                                                                                                                                                                                                                                                                                                                                                                                                                                                                                                                                                                                                                                                                                                                                                                                                                                                                                                                                                                                                                                                                                                                                                  |                                                                                                                                                                                                                         |  |  |       |                  |  |       |                  |  |       |                  |  |                                                                          |  |  |        |  |                  |  |                                |                                |                 |                  |                  |                                                                            |  |  |       |                  |  |       |                  |  |       |                  |  |                                                                          |  |  |        |  |                  |  |                                |                                |                 |                  |                  |                                                                            |  |  |       |                  |  |       |                  |  |       |                  |  |                                                                          |  |  |  |
| <b>Gender interaction with period</b> (Pre-COVID-19 is ref, male is ref)   |                                                                                                                                           |                                                                                                                                                                                                     |                                                                                                                                                                                                                                                                                                                                                                                                                                                                                                                                                                                                                                                                                                                                                                                                                                          |                                       |                                                                                                                                                                                                                                                                                                                                                                                                                                                                                                                                                                                                                                                                                                                                                                                                                                                                                                                                                                                                                                                                                                                                                                                                                                                                                                                                                                                                                                                                                                                                                                                                                                                                                                                                                                                                                                                                                                                  |                                                                                                                                                                                                                         |  |  |       |                  |  |       |                  |  |       |                  |  |                                                                          |  |  |        |  |                  |  |                                |                                |                 |                  |                  |                                                                            |  |  |       |                  |  |       |                  |  |       |                  |  |                                                                          |  |  |        |  |                  |  |                                |                                |                 |                  |                  |                                                                            |  |  |       |                  |  |       |                  |  |       |                  |  |                                                                          |  |  |  |

| Reference<br>(First author, publication year) | General<br>(Study design<br>Study name<br>Country of study<br>Time of study<br>No. of waves<br>Follow-up duration<br>(e.g., mean, range)) | Population<br>(Description<br>Inclusion criteria<br># invited<br># baseline<br># follow-up<br>Age at baseline<br>% females<br>Response<br>Lost to follow-up) | Exposure<br>(Description & assessment)                                             | Outcome<br>(Description & assessment)                                                               | Results<br>(Description of all topically relevant results)                                                                                                                                                                                                                                                                                                                                                                                                                                                                                                                                                                                                                                                                                                                                                                                                                                                                                                                                                                                                                                                                                                                                                                                                                                                                                                                                                                                                                                                                                                                                                                                                                                                                                                                                                      | Comments<br>(study quality [overall assessment according to Iijaz/Shamliyan/SIGN/CASP]<br>Conflict of interest [stated vs. not stated]<br>Funding (public, non-profit, commercial)<br>Strengths (+) and weaknesses (-)) |  |                  |  |                                |                                |                 |                  |                  |       |                  |  |       |                  |  |       |                  |  |        |  |                  |  |                                |                                |                 |                  |                  |       |                  |  |       |                  |  |       |                  |  |        |  |                  |  |
|-----------------------------------------------|-------------------------------------------------------------------------------------------------------------------------------------------|--------------------------------------------------------------------------------------------------------------------------------------------------------------|------------------------------------------------------------------------------------|-----------------------------------------------------------------------------------------------------|-----------------------------------------------------------------------------------------------------------------------------------------------------------------------------------------------------------------------------------------------------------------------------------------------------------------------------------------------------------------------------------------------------------------------------------------------------------------------------------------------------------------------------------------------------------------------------------------------------------------------------------------------------------------------------------------------------------------------------------------------------------------------------------------------------------------------------------------------------------------------------------------------------------------------------------------------------------------------------------------------------------------------------------------------------------------------------------------------------------------------------------------------------------------------------------------------------------------------------------------------------------------------------------------------------------------------------------------------------------------------------------------------------------------------------------------------------------------------------------------------------------------------------------------------------------------------------------------------------------------------------------------------------------------------------------------------------------------------------------------------------------------------------------------------------------------|-------------------------------------------------------------------------------------------------------------------------------------------------------------------------------------------------------------------------|--|------------------|--|--------------------------------|--------------------------------|-----------------|------------------|------------------|-------|------------------|--|-------|------------------|--|-------|------------------|--|--------|--|------------------|--|--------------------------------|--------------------------------|-----------------|------------------|------------------|-------|------------------|--|-------|------------------|--|-------|------------------|--|--------|--|------------------|--|
|                                               |                                                                                                                                           |                                                                                                                                                              |                                                                                    |                                                                                                     | <table><tr><td>Female</td><td></td><td>0.70 (0.56–0.88)</td></tr></table> <p><b>Table S8: Current smoking</b></p> <table><tr><td></td><td><b>Model 1</b><br/>RR (95 % CI)</td><td><b>Model 2</b><br/>RR (95 % CI)</td></tr><tr><td>During Covid-19</td><td>0.80 (0.69–0.93)</td><td>0.88 (0.78–0.98)</td></tr></table> <p><b>Age group interaction with period</b> (Pre-COVID-19 is ref, 65+ is ref)</p> <table><tr><td>18–24</td><td>1.23 (0.95–1.60)</td><td></td></tr><tr><td>25–44</td><td>1.08 (0.91–1.28)</td><td></td></tr><tr><td>45–64</td><td>1.14 (0.99–1.32)</td><td></td></tr></table> <p><b>Gender interaction with period</b> (Pre-COVID-19 is ref, male is ref)</p> <table><tr><td>Female</td><td></td><td>1.03 (0.93–1.16)</td></tr></table> <p><b>Table S9: Regular e-cigarette use</b></p> <table><tr><td></td><td><b>Model 1</b><br/>RR (95 % CI)</td><td><b>Model 2</b><br/>RR (95 % CI)</td></tr><tr><td>During Covid-19</td><td>0.68 (0.46–1.01)</td><td>0.61 (0.43–0.86)</td></tr></table> <p><b>Age group interaction with period</b> (Pre-COVID-19 is ref, 65+ is ref)</p> <table><tr><td>18–24</td><td>1.01 (0.40–2.58)</td><td></td></tr><tr><td>25–44</td><td>0.92 (0.64–1.31)</td><td></td></tr><tr><td>45–64</td><td>1.00 (0.71–1.39)</td><td></td></tr></table> <p><b>Gender interaction with period</b> (Pre-COVID-19 is ref, male is ref)</p> <table><tr><td>Female</td><td></td><td>1.20 (0.91–1.58)</td></tr></table> <p>Multi-level Poisson regression<br/>Model 1: adjusted for year, age group, gender, ethnicity, period and period x age group interaction<br/>Model 2: adjusted for year, age group, gender, ethnicity, period and period x gender interaction</p> <p><b>Table 1: Change in physical activity between 2017–2019 and COVID-19 lockdown in 2020</b></p> | Female                                                                                                                                                                                                                  |  | 0.70 (0.56–0.88) |  | <b>Model 1</b><br>RR (95 % CI) | <b>Model 2</b><br>RR (95 % CI) | During Covid-19 | 0.80 (0.69–0.93) | 0.88 (0.78–0.98) | 18–24 | 1.23 (0.95–1.60) |  | 25–44 | 1.08 (0.91–1.28) |  | 45–64 | 1.14 (0.99–1.32) |  | Female |  | 1.03 (0.93–1.16) |  | <b>Model 1</b><br>RR (95 % CI) | <b>Model 2</b><br>RR (95 % CI) | During Covid-19 | 0.68 (0.46–1.01) | 0.61 (0.43–0.86) | 18–24 | 1.01 (0.40–2.58) |  | 25–44 | 0.92 (0.64–1.31) |  | 45–64 | 1.00 (0.71–1.39) |  | Female |  | 1.20 (0.91–1.58) |  |
| Female                                        |                                                                                                                                           | 0.70 (0.56–0.88)                                                                                                                                             |                                                                                    |                                                                                                     |                                                                                                                                                                                                                                                                                                                                                                                                                                                                                                                                                                                                                                                                                                                                                                                                                                                                                                                                                                                                                                                                                                                                                                                                                                                                                                                                                                                                                                                                                                                                                                                                                                                                                                                                                                                                                 |                                                                                                                                                                                                                         |  |                  |  |                                |                                |                 |                  |                  |       |                  |  |       |                  |  |       |                  |  |        |  |                  |  |                                |                                |                 |                  |                  |       |                  |  |       |                  |  |       |                  |  |        |  |                  |  |
|                                               | <b>Model 1</b><br>RR (95 % CI)                                                                                                            | <b>Model 2</b><br>RR (95 % CI)                                                                                                                               |                                                                                    |                                                                                                     |                                                                                                                                                                                                                                                                                                                                                                                                                                                                                                                                                                                                                                                                                                                                                                                                                                                                                                                                                                                                                                                                                                                                                                                                                                                                                                                                                                                                                                                                                                                                                                                                                                                                                                                                                                                                                 |                                                                                                                                                                                                                         |  |                  |  |                                |                                |                 |                  |                  |       |                  |  |       |                  |  |       |                  |  |        |  |                  |  |                                |                                |                 |                  |                  |       |                  |  |       |                  |  |       |                  |  |        |  |                  |  |
| During Covid-19                               | 0.80 (0.69–0.93)                                                                                                                          | 0.88 (0.78–0.98)                                                                                                                                             |                                                                                    |                                                                                                     |                                                                                                                                                                                                                                                                                                                                                                                                                                                                                                                                                                                                                                                                                                                                                                                                                                                                                                                                                                                                                                                                                                                                                                                                                                                                                                                                                                                                                                                                                                                                                                                                                                                                                                                                                                                                                 |                                                                                                                                                                                                                         |  |                  |  |                                |                                |                 |                  |                  |       |                  |  |       |                  |  |       |                  |  |        |  |                  |  |                                |                                |                 |                  |                  |       |                  |  |       |                  |  |       |                  |  |        |  |                  |  |
| 18–24                                         | 1.23 (0.95–1.60)                                                                                                                          |                                                                                                                                                              |                                                                                    |                                                                                                     |                                                                                                                                                                                                                                                                                                                                                                                                                                                                                                                                                                                                                                                                                                                                                                                                                                                                                                                                                                                                                                                                                                                                                                                                                                                                                                                                                                                                                                                                                                                                                                                                                                                                                                                                                                                                                 |                                                                                                                                                                                                                         |  |                  |  |                                |                                |                 |                  |                  |       |                  |  |       |                  |  |       |                  |  |        |  |                  |  |                                |                                |                 |                  |                  |       |                  |  |       |                  |  |       |                  |  |        |  |                  |  |
| 25–44                                         | 1.08 (0.91–1.28)                                                                                                                          |                                                                                                                                                              |                                                                                    |                                                                                                     |                                                                                                                                                                                                                                                                                                                                                                                                                                                                                                                                                                                                                                                                                                                                                                                                                                                                                                                                                                                                                                                                                                                                                                                                                                                                                                                                                                                                                                                                                                                                                                                                                                                                                                                                                                                                                 |                                                                                                                                                                                                                         |  |                  |  |                                |                                |                 |                  |                  |       |                  |  |       |                  |  |       |                  |  |        |  |                  |  |                                |                                |                 |                  |                  |       |                  |  |       |                  |  |       |                  |  |        |  |                  |  |
| 45–64                                         | 1.14 (0.99–1.32)                                                                                                                          |                                                                                                                                                              |                                                                                    |                                                                                                     |                                                                                                                                                                                                                                                                                                                                                                                                                                                                                                                                                                                                                                                                                                                                                                                                                                                                                                                                                                                                                                                                                                                                                                                                                                                                                                                                                                                                                                                                                                                                                                                                                                                                                                                                                                                                                 |                                                                                                                                                                                                                         |  |                  |  |                                |                                |                 |                  |                  |       |                  |  |       |                  |  |       |                  |  |        |  |                  |  |                                |                                |                 |                  |                  |       |                  |  |       |                  |  |       |                  |  |        |  |                  |  |
| Female                                        |                                                                                                                                           | 1.03 (0.93–1.16)                                                                                                                                             |                                                                                    |                                                                                                     |                                                                                                                                                                                                                                                                                                                                                                                                                                                                                                                                                                                                                                                                                                                                                                                                                                                                                                                                                                                                                                                                                                                                                                                                                                                                                                                                                                                                                                                                                                                                                                                                                                                                                                                                                                                                                 |                                                                                                                                                                                                                         |  |                  |  |                                |                                |                 |                  |                  |       |                  |  |       |                  |  |       |                  |  |        |  |                  |  |                                |                                |                 |                  |                  |       |                  |  |       |                  |  |       |                  |  |        |  |                  |  |
|                                               | <b>Model 1</b><br>RR (95 % CI)                                                                                                            | <b>Model 2</b><br>RR (95 % CI)                                                                                                                               |                                                                                    |                                                                                                     |                                                                                                                                                                                                                                                                                                                                                                                                                                                                                                                                                                                                                                                                                                                                                                                                                                                                                                                                                                                                                                                                                                                                                                                                                                                                                                                                                                                                                                                                                                                                                                                                                                                                                                                                                                                                                 |                                                                                                                                                                                                                         |  |                  |  |                                |                                |                 |                  |                  |       |                  |  |       |                  |  |       |                  |  |        |  |                  |  |                                |                                |                 |                  |                  |       |                  |  |       |                  |  |       |                  |  |        |  |                  |  |
| During Covid-19                               | 0.68 (0.46–1.01)                                                                                                                          | 0.61 (0.43–0.86)                                                                                                                                             |                                                                                    |                                                                                                     |                                                                                                                                                                                                                                                                                                                                                                                                                                                                                                                                                                                                                                                                                                                                                                                                                                                                                                                                                                                                                                                                                                                                                                                                                                                                                                                                                                                                                                                                                                                                                                                                                                                                                                                                                                                                                 |                                                                                                                                                                                                                         |  |                  |  |                                |                                |                 |                  |                  |       |                  |  |       |                  |  |       |                  |  |        |  |                  |  |                                |                                |                 |                  |                  |       |                  |  |       |                  |  |       |                  |  |        |  |                  |  |
| 18–24                                         | 1.01 (0.40–2.58)                                                                                                                          |                                                                                                                                                              |                                                                                    |                                                                                                     |                                                                                                                                                                                                                                                                                                                                                                                                                                                                                                                                                                                                                                                                                                                                                                                                                                                                                                                                                                                                                                                                                                                                                                                                                                                                                                                                                                                                                                                                                                                                                                                                                                                                                                                                                                                                                 |                                                                                                                                                                                                                         |  |                  |  |                                |                                |                 |                  |                  |       |                  |  |       |                  |  |       |                  |  |        |  |                  |  |                                |                                |                 |                  |                  |       |                  |  |       |                  |  |       |                  |  |        |  |                  |  |
| 25–44                                         | 0.92 (0.64–1.31)                                                                                                                          |                                                                                                                                                              |                                                                                    |                                                                                                     |                                                                                                                                                                                                                                                                                                                                                                                                                                                                                                                                                                                                                                                                                                                                                                                                                                                                                                                                                                                                                                                                                                                                                                                                                                                                                                                                                                                                                                                                                                                                                                                                                                                                                                                                                                                                                 |                                                                                                                                                                                                                         |  |                  |  |                                |                                |                 |                  |                  |       |                  |  |       |                  |  |       |                  |  |        |  |                  |  |                                |                                |                 |                  |                  |       |                  |  |       |                  |  |       |                  |  |        |  |                  |  |
| 45–64                                         | 1.00 (0.71–1.39)                                                                                                                          |                                                                                                                                                              |                                                                                    |                                                                                                     |                                                                                                                                                                                                                                                                                                                                                                                                                                                                                                                                                                                                                                                                                                                                                                                                                                                                                                                                                                                                                                                                                                                                                                                                                                                                                                                                                                                                                                                                                                                                                                                                                                                                                                                                                                                                                 |                                                                                                                                                                                                                         |  |                  |  |                                |                                |                 |                  |                  |       |                  |  |       |                  |  |       |                  |  |        |  |                  |  |                                |                                |                 |                  |                  |       |                  |  |       |                  |  |       |                  |  |        |  |                  |  |
| Female                                        |                                                                                                                                           | 1.20 (0.91–1.58)                                                                                                                                             |                                                                                    |                                                                                                     |                                                                                                                                                                                                                                                                                                                                                                                                                                                                                                                                                                                                                                                                                                                                                                                                                                                                                                                                                                                                                                                                                                                                                                                                                                                                                                                                                                                                                                                                                                                                                                                                                                                                                                                                                                                                                 |                                                                                                                                                                                                                         |  |                  |  |                                |                                |                 |                  |                  |       |                  |  |       |                  |  |       |                  |  |        |  |                  |  |                                |                                |                 |                  |                  |       |                  |  |       |                  |  |       |                  |  |        |  |                  |  |
| Okely et al., 2020                            | <b>Study design:</b><br>Cohort study<br><b>Study name:</b>                                                                                | <b>Description:</b><br>Community-dwelling older adults (born in 1936)                                                                                        | <b>COVID-19 lockdown</b> (that lasted 34 days at the beginning of data collection) | <b>Physical activity:</b><br>Self-reported single question (“What level of physical activity do you |                                                                                                                                                                                                                                                                                                                                                                                                                                                                                                                                                                                                                                                                                                                                                                                                                                                                                                                                                                                                                                                                                                                                                                                                                                                                                                                                                                                                                                                                                                                                                                                                                                                                                                                                                                                                                 | <b>Overall study quality:</b><br>High risk<br><b>Conflict of interest</b><br>Stated (none declared)                                                                                                                     |  |                  |  |                                |                                |                 |                  |                  |       |                  |  |       |                  |  |       |                  |  |        |  |                  |  |                                |                                |                 |                  |                  |       |                  |  |       |                  |  |       |                  |  |        |  |                  |  |

| Reference<br>(First author, publication year)         | General<br>(Study design<br>Study name<br>Country of study<br>Time of study<br>No. of waves<br>Follow-up duration<br>(e.g., mean, range))                                                                                                                                    | Population<br>(Description<br>Inclusion criteria<br># invited<br># baseline<br># follow-up<br>Age at baseline<br>% females<br>Response<br>Lost to follow-up)                                                                                                            | Exposure<br>(Description & assessment) | Outcome<br>(Description & assessment)                                                                                                                                                                      | Results<br>(Description of all topically relevant results)                                                                                                                                                                                                                                                                                                                                                                                                                                                                                                                                                                                                                                                                                                                                                                                                                                                                                                                                                                                                                                                                                                                                                                                          | Comments<br>(study quality [overall assessment according to Iljaz/Shamliyan/SIGN/CASP]<br>Conflict of interest [stated vs. not stated]<br>Funding (public, non-profit, commercial)<br>Strengths (+) and weaknesses (-)) |                     |                      |   |                                                      |  |  |  |                       |                |                |       |                               |                |                |                               |                |                |                              |                |           |                              |           |            |                                             |           |           |  |                                                      |  |  |  |                                     |                |                |       |                                                       |            |            |                                                                                                                                                                                                                                                                                                                                                                                                                                                                                                                                                                                                                                                                                                                                                                                                                                                                                                                               |
|-------------------------------------------------------|------------------------------------------------------------------------------------------------------------------------------------------------------------------------------------------------------------------------------------------------------------------------------|-------------------------------------------------------------------------------------------------------------------------------------------------------------------------------------------------------------------------------------------------------------------------|----------------------------------------|------------------------------------------------------------------------------------------------------------------------------------------------------------------------------------------------------------|-----------------------------------------------------------------------------------------------------------------------------------------------------------------------------------------------------------------------------------------------------------------------------------------------------------------------------------------------------------------------------------------------------------------------------------------------------------------------------------------------------------------------------------------------------------------------------------------------------------------------------------------------------------------------------------------------------------------------------------------------------------------------------------------------------------------------------------------------------------------------------------------------------------------------------------------------------------------------------------------------------------------------------------------------------------------------------------------------------------------------------------------------------------------------------------------------------------------------------------------------------|-------------------------------------------------------------------------------------------------------------------------------------------------------------------------------------------------------------------------|---------------------|----------------------|---|------------------------------------------------------|--|--|--|-----------------------|----------------|----------------|-------|-------------------------------|----------------|----------------|-------------------------------|----------------|----------------|------------------------------|----------------|-----------|------------------------------|-----------|------------|---------------------------------------------|-----------|-----------|--|------------------------------------------------------|--|--|--|-------------------------------------|----------------|----------------|-------|-------------------------------------------------------|------------|------------|-------------------------------------------------------------------------------------------------------------------------------------------------------------------------------------------------------------------------------------------------------------------------------------------------------------------------------------------------------------------------------------------------------------------------------------------------------------------------------------------------------------------------------------------------------------------------------------------------------------------------------------------------------------------------------------------------------------------------------------------------------------------------------------------------------------------------------------------------------------------------------------------------------------------------------|
|                                                       | Lothian Birth Cohort 1936 (LBC1936) study<br><b>Country of study:</b> Scotland<br><b>Time of study:</b> Baseline (T1): 2017–2019 (wave 5) of the LBC1936 study<br>Follow-up (T2): May 27–June 8, 2020<br><b>No. of waves:</b> $n = 2$<br><b>Follow-up duration:</b> ~2 years | <b>Inclusion criteria:</b> n.r.<br><b># invited at follow-up:</b> $n = 454$<br><b># baseline:</b> n.r.<br><b># follow-up:</b> $n = 137$<br><b>Age at baseline:</b> M: 84 years<br><b>% females:</b> 48.2 %<br><b>Response:</b> 30.2 %<br><b>Lost to follow-up:</b> n.r. |                                        | mainly do?"") with a 6-point scale (ranging from score 1: "moving only in connection with necessary (household) chores" to score 6 "keep fit/heavy exercise or competitive sport several times per week".) | <table><thead><tr><th></th><th>Baseline<br/>(n (%))</th><th>Follow-up<br/>(n (%))</th><th>p</th></tr></thead><tbody><tr><td colspan="4"><b>Physical activity (6-point scale)<sup>1</sup></b></td></tr><tr><td>Only household chores</td><td>14<br/>(10.2 %)</td><td>26<br/>(19.0 %)</td><td rowspan="5">0.012</td></tr><tr><td>Outdoor activities 1–2x/ week</td><td>28<br/>(20.4 %)</td><td>23<br/>(16.8 %)</td></tr><tr><td>Outdoor activities &gt; 2x/ week</td><td>67<br/>(48.9 %)</td><td>74<br/>(54.0 %)</td></tr><tr><td>Moderate exercise 1–2x/ week</td><td>19<br/>(13.9 %)</td><td>4 (2.9 %)</td></tr><tr><td>Moderate exercise &gt; 2x/ week</td><td>6 (4.4 %)</td><td>10 (7.3 %)</td></tr><tr><td>Keep-fit/heavy exercise several times/ week</td><td>3 (2.2 %)</td><td>0 (0.0 %)</td><td></td></tr><tr><td colspan="4"><b>Physical activity (2-point scale)<sup>2</sup></b></td></tr><tr><td>Minimal physical activity (score 1)</td><td>14<br/>(10.2 %)</td><td>26<br/>(19.0 %)</td><td rowspan="2">0.038</td></tr><tr><td>Any higher category of physical activity (scores 2–6)</td><td>123 (89.8)</td><td>111 (81.0)</td></tr></tbody></table><br><sup>1</sup> vage<br><br><sup>2</sup> McNemar's test (with continuity correction) |                                                                                                                                                                                                                         | Baseline<br>(n (%)) | Follow-up<br>(n (%)) | p | <b>Physical activity (6-point scale)<sup>1</sup></b> |  |  |  | Only household chores | 14<br>(10.2 %) | 26<br>(19.0 %) | 0.012 | Outdoor activities 1–2x/ week | 28<br>(20.4 %) | 23<br>(16.8 %) | Outdoor activities > 2x/ week | 67<br>(48.9 %) | 74<br>(54.0 %) | Moderate exercise 1–2x/ week | 19<br>(13.9 %) | 4 (2.9 %) | Moderate exercise > 2x/ week | 6 (4.4 %) | 10 (7.3 %) | Keep-fit/heavy exercise several times/ week | 3 (2.2 %) | 0 (0.0 %) |  | <b>Physical activity (2-point scale)<sup>2</sup></b> |  |  |  | Minimal physical activity (score 1) | 14<br>(10.2 %) | 26<br>(19.0 %) | 0.038 | Any higher category of physical activity (scores 2–6) | 123 (89.8) | 111 (81.0) | <b>Funding:</b><br>Public funds<br><br>+ ethical approval from the Multi-Centre Research Ethics Committee for Scotland, the Lothian Research Ethics Committee, and the Scotland A Research Ethics Committee<br>+ complete sampling (from all eligible participants of the LBC1936 study (further representative sampling of the original study))<br>+ using Wilcoxon signed rank test and McNemar's test to investigate differences<br>+ consideration of the confounder "age" (homogeneous group)<br>+ temporal investigation<br><br>- outcome measurement with a self-developed, self-reported single question<br>- no consideration of the confounder "sex" in statistical analysis<br>- some changes may have been caused by the effects of ageing rather than lockdown measures, however, results from subsidiary analysis, testing for changes in physical activity between earlier waves of the LBC1936 study, suggest |
|                                                       | Baseline<br>(n (%))                                                                                                                                                                                                                                                          | Follow-up<br>(n (%))                                                                                                                                                                                                                                                    | p                                      |                                                                                                                                                                                                            |                                                                                                                                                                                                                                                                                                                                                                                                                                                                                                                                                                                                                                                                                                                                                                                                                                                                                                                                                                                                                                                                                                                                                                                                                                                     |                                                                                                                                                                                                                         |                     |                      |   |                                                      |  |  |  |                       |                |                |       |                               |                |                |                               |                |                |                              |                |           |                              |           |            |                                             |           |           |  |                                                      |  |  |  |                                     |                |                |       |                                                       |            |            |                                                                                                                                                                                                                                                                                                                                                                                                                                                                                                                                                                                                                                                                                                                                                                                                                                                                                                                               |
| <b>Physical activity (6-point scale)<sup>1</sup></b>  |                                                                                                                                                                                                                                                                              |                                                                                                                                                                                                                                                                         |                                        |                                                                                                                                                                                                            |                                                                                                                                                                                                                                                                                                                                                                                                                                                                                                                                                                                                                                                                                                                                                                                                                                                                                                                                                                                                                                                                                                                                                                                                                                                     |                                                                                                                                                                                                                         |                     |                      |   |                                                      |  |  |  |                       |                |                |       |                               |                |                |                               |                |                |                              |                |           |                              |           |            |                                             |           |           |  |                                                      |  |  |  |                                     |                |                |       |                                                       |            |            |                                                                                                                                                                                                                                                                                                                                                                                                                                                                                                                                                                                                                                                                                                                                                                                                                                                                                                                               |
| Only household chores                                 | 14<br>(10.2 %)                                                                                                                                                                                                                                                               | 26<br>(19.0 %)                                                                                                                                                                                                                                                          | 0.012                                  |                                                                                                                                                                                                            |                                                                                                                                                                                                                                                                                                                                                                                                                                                                                                                                                                                                                                                                                                                                                                                                                                                                                                                                                                                                                                                                                                                                                                                                                                                     |                                                                                                                                                                                                                         |                     |                      |   |                                                      |  |  |  |                       |                |                |       |                               |                |                |                               |                |                |                              |                |           |                              |           |            |                                             |           |           |  |                                                      |  |  |  |                                     |                |                |       |                                                       |            |            |                                                                                                                                                                                                                                                                                                                                                                                                                                                                                                                                                                                                                                                                                                                                                                                                                                                                                                                               |
| Outdoor activities 1–2x/ week                         | 28<br>(20.4 %)                                                                                                                                                                                                                                                               | 23<br>(16.8 %)                                                                                                                                                                                                                                                          |                                        |                                                                                                                                                                                                            |                                                                                                                                                                                                                                                                                                                                                                                                                                                                                                                                                                                                                                                                                                                                                                                                                                                                                                                                                                                                                                                                                                                                                                                                                                                     |                                                                                                                                                                                                                         |                     |                      |   |                                                      |  |  |  |                       |                |                |       |                               |                |                |                               |                |                |                              |                |           |                              |           |            |                                             |           |           |  |                                                      |  |  |  |                                     |                |                |       |                                                       |            |            |                                                                                                                                                                                                                                                                                                                                                                                                                                                                                                                                                                                                                                                                                                                                                                                                                                                                                                                               |
| Outdoor activities > 2x/ week                         | 67<br>(48.9 %)                                                                                                                                                                                                                                                               | 74<br>(54.0 %)                                                                                                                                                                                                                                                          |                                        |                                                                                                                                                                                                            |                                                                                                                                                                                                                                                                                                                                                                                                                                                                                                                                                                                                                                                                                                                                                                                                                                                                                                                                                                                                                                                                                                                                                                                                                                                     |                                                                                                                                                                                                                         |                     |                      |   |                                                      |  |  |  |                       |                |                |       |                               |                |                |                               |                |                |                              |                |           |                              |           |            |                                             |           |           |  |                                                      |  |  |  |                                     |                |                |       |                                                       |            |            |                                                                                                                                                                                                                                                                                                                                                                                                                                                                                                                                                                                                                                                                                                                                                                                                                                                                                                                               |
| Moderate exercise 1–2x/ week                          | 19<br>(13.9 %)                                                                                                                                                                                                                                                               | 4 (2.9 %)                                                                                                                                                                                                                                                               |                                        |                                                                                                                                                                                                            |                                                                                                                                                                                                                                                                                                                                                                                                                                                                                                                                                                                                                                                                                                                                                                                                                                                                                                                                                                                                                                                                                                                                                                                                                                                     |                                                                                                                                                                                                                         |                     |                      |   |                                                      |  |  |  |                       |                |                |       |                               |                |                |                               |                |                |                              |                |           |                              |           |            |                                             |           |           |  |                                                      |  |  |  |                                     |                |                |       |                                                       |            |            |                                                                                                                                                                                                                                                                                                                                                                                                                                                                                                                                                                                                                                                                                                                                                                                                                                                                                                                               |
| Moderate exercise > 2x/ week                          | 6 (4.4 %)                                                                                                                                                                                                                                                                    | 10 (7.3 %)                                                                                                                                                                                                                                                              |                                        |                                                                                                                                                                                                            |                                                                                                                                                                                                                                                                                                                                                                                                                                                                                                                                                                                                                                                                                                                                                                                                                                                                                                                                                                                                                                                                                                                                                                                                                                                     |                                                                                                                                                                                                                         |                     |                      |   |                                                      |  |  |  |                       |                |                |       |                               |                |                |                               |                |                |                              |                |           |                              |           |            |                                             |           |           |  |                                                      |  |  |  |                                     |                |                |       |                                                       |            |            |                                                                                                                                                                                                                                                                                                                                                                                                                                                                                                                                                                                                                                                                                                                                                                                                                                                                                                                               |
| Keep-fit/heavy exercise several times/ week           | 3 (2.2 %)                                                                                                                                                                                                                                                                    | 0 (0.0 %)                                                                                                                                                                                                                                                               |                                        |                                                                                                                                                                                                            |                                                                                                                                                                                                                                                                                                                                                                                                                                                                                                                                                                                                                                                                                                                                                                                                                                                                                                                                                                                                                                                                                                                                                                                                                                                     |                                                                                                                                                                                                                         |                     |                      |   |                                                      |  |  |  |                       |                |                |       |                               |                |                |                               |                |                |                              |                |           |                              |           |            |                                             |           |           |  |                                                      |  |  |  |                                     |                |                |       |                                                       |            |            |                                                                                                                                                                                                                                                                                                                                                                                                                                                                                                                                                                                                                                                                                                                                                                                                                                                                                                                               |
| <b>Physical activity (2-point scale)<sup>2</sup></b>  |                                                                                                                                                                                                                                                                              |                                                                                                                                                                                                                                                                         |                                        |                                                                                                                                                                                                            |                                                                                                                                                                                                                                                                                                                                                                                                                                                                                                                                                                                                                                                                                                                                                                                                                                                                                                                                                                                                                                                                                                                                                                                                                                                     |                                                                                                                                                                                                                         |                     |                      |   |                                                      |  |  |  |                       |                |                |       |                               |                |                |                               |                |                |                              |                |           |                              |           |            |                                             |           |           |  |                                                      |  |  |  |                                     |                |                |       |                                                       |            |            |                                                                                                                                                                                                                                                                                                                                                                                                                                                                                                                                                                                                                                                                                                                                                                                                                                                                                                                               |
| Minimal physical activity (score 1)                   | 14<br>(10.2 %)                                                                                                                                                                                                                                                               | 26<br>(19.0 %)                                                                                                                                                                                                                                                          | 0.038                                  |                                                                                                                                                                                                            |                                                                                                                                                                                                                                                                                                                                                                                                                                                                                                                                                                                                                                                                                                                                                                                                                                                                                                                                                                                                                                                                                                                                                                                                                                                     |                                                                                                                                                                                                                         |                     |                      |   |                                                      |  |  |  |                       |                |                |       |                               |                |                |                               |                |                |                              |                |           |                              |           |            |                                             |           |           |  |                                                      |  |  |  |                                     |                |                |       |                                                       |            |            |                                                                                                                                                                                                                                                                                                                                                                                                                                                                                                                                                                                                                                                                                                                                                                                                                                                                                                                               |
| Any higher category of physical activity (scores 2–6) | 123 (89.8)                                                                                                                                                                                                                                                                   | 111 (81.0)                                                                                                                                                                                                                                                              |                                        |                                                                                                                                                                                                            |                                                                                                                                                                                                                                                                                                                                                                                                                                                                                                                                                                                                                                                                                                                                                                                                                                                                                                                                                                                                                                                                                                                                                                                                                                                     |                                                                                                                                                                                                                         |                     |                      |   |                                                      |  |  |  |                       |                |                |       |                               |                |                |                               |                |                |                              |                |           |                              |           |            |                                             |           |           |  |                                                      |  |  |  |                                     |                |                |       |                                                       |            |            |                                                                                                                                                                                                                                                                                                                                                                                                                                                                                                                                                                                                                                                                                                                                                                                                                                                                                                                               |

| Reference<br>(First author, publication year) | General<br>(Study design<br>Study name<br>Country of study<br>Time of study<br>No. of waves<br>Follow-up duration<br>(e.g., mean, range))                                                                                                         | Population<br>(Description<br>Inclusion criteria<br># invited<br># baseline<br># follow-up<br>Age at baseline<br>% females<br>Response<br>Lost to follow-up)                                                                                                                                                                                                                                                                                                     | Exposure<br>(Description & assessment)                                                                                                            | Outcome<br>(Description & assessment)                                                                                                                                                                                                            | Results<br>(Description of all topically relevant results)                                                                                                                                                                                                                                                                                                                                                                                                                                                                                                                                                                                                                                                                                                                                                                                                                                                                                                                                                                       | Comments<br>(study quality [overall assessment according to Iljaz/Shamliyan/SIGN/CASP]<br>Conflict of interest [stated vs. not stated]<br>Funding (public, non-profit, commercial)<br>Strengths (+) and weaknesses (-))                                                                                                                                                                                          |                    |                          |  |          |            |          |            |      |              |                    |  |          |            |          |            |      |              |               |  |          |            |          |            |      |            |                |  |          |           |          |           |      |           |                                                                                                                                                                                                                                                                                                                                                                                                                                                                                                                                                       |
|-----------------------------------------------|---------------------------------------------------------------------------------------------------------------------------------------------------------------------------------------------------------------------------------------------------|------------------------------------------------------------------------------------------------------------------------------------------------------------------------------------------------------------------------------------------------------------------------------------------------------------------------------------------------------------------------------------------------------------------------------------------------------------------|---------------------------------------------------------------------------------------------------------------------------------------------------|--------------------------------------------------------------------------------------------------------------------------------------------------------------------------------------------------------------------------------------------------|----------------------------------------------------------------------------------------------------------------------------------------------------------------------------------------------------------------------------------------------------------------------------------------------------------------------------------------------------------------------------------------------------------------------------------------------------------------------------------------------------------------------------------------------------------------------------------------------------------------------------------------------------------------------------------------------------------------------------------------------------------------------------------------------------------------------------------------------------------------------------------------------------------------------------------------------------------------------------------------------------------------------------------|------------------------------------------------------------------------------------------------------------------------------------------------------------------------------------------------------------------------------------------------------------------------------------------------------------------------------------------------------------------------------------------------------------------|--------------------|--------------------------|--|----------|------------|----------|------------|------|--------------|--------------------|--|----------|------------|----------|------------|------|--------------|---------------|--|----------|------------|----------|------------|------|------------|----------------|--|----------|-----------|----------|-----------|------|-----------|-------------------------------------------------------------------------------------------------------------------------------------------------------------------------------------------------------------------------------------------------------------------------------------------------------------------------------------------------------------------------------------------------------------------------------------------------------------------------------------------------------------------------------------------------------|
|                                               |                                                                                                                                                                                                                                                   |                                                                                                                                                                                                                                                                                                                                                                                                                                                                  |                                                                                                                                                   |                                                                                                                                                                                                                                                  |                                                                                                                                                                                                                                                                                                                                                                                                                                                                                                                                                                                                                                                                                                                                                                                                                                                                                                                                                                                                                                  | that age-related changes are typically smaller than those documented in the study<br>- drop-out analysis: difference between excluded and included participants: included individuals had a higher IQ at age 1, were better in cognition (cognitive ability, less severe memory problems), had more years of education, a higher occupational social class, a higher intellect, and a higher emotional stability |                    |                          |  |          |            |          |            |      |              |                    |  |          |            |          |            |      |              |               |  |          |            |          |            |      |            |                |  |          |           |          |           |      |           |                                                                                                                                                                                                                                                                                                                                                                                                                                                                                                                                                       |
| Radwan et al., 2021                           | <b>Study design:</b><br>Cross-sectional study<br><b>Study name:</b><br>n.a.<br><b>Country of study:</b><br>United Arab Emirates<br><b>Time of study:</b><br>May 5–18, 2020<br><b>No. of waves:</b><br>n = 1<br><b>Follow-up duration:</b><br>n.a. | <b>Description:</b><br>Adults<br><b>Inclusion criteria:</b><br>Residents of the United Arab Emirates, aged ≥ 18 years<br><b># invited:</b><br>n = 13,500<br><b># baseline:</b><br>n = 2,135<br><b># included in analysis</b><br>n = 2,060<br><b># follow-up:</b><br>n.a.<br><b>Age at baseline:</b><br>18–30 years: 31.7 %,<br>31–40 years: 38.4 %, > 40 years: 29.9 %<br><b>% females:</b><br>75.1 %<br><b>Response:</b><br>15.8 %<br><b>Lost to follow-up:</b> | <b>COVID-19 lockdown:</b><br>- on March 22, 2020, the United Arab Emirates authorities applied both strict infection control and partial lockdown | <b>(Change in) dietary intake:</b><br>Self-reported question<br><b>(Change in) weight:</b><br>Self-reported question<br><b>(Change in) physical activity:</b><br>Self-reported question<br><b>(Change in) smoking:</b><br>Self-reported question | <b>Table 2: Descriptive statistics for changes in lifestyle behaviors</b> <table><tr><th></th><th>Prevalence (n (%))</th></tr><tr><td colspan="2"><b>Physical activity</b></td></tr><tr><td>Increase</td><td>340 (16.5)</td></tr><tr><td>Decrease</td><td>618 (30.0)</td></tr><tr><td>Same</td><td>1,102 (53.5)</td></tr><tr><td colspan="2"><b>Food intake</b></td></tr><tr><td>Increase</td><td>655 (31.8)</td></tr><tr><td>Decrease</td><td>344 (16.7)</td></tr><tr><td>Same</td><td>1,061 (51.5)</td></tr><tr><td colspan="2"><b>Weight</b></td></tr><tr><td>Increase</td><td>606 (29.4)</td></tr><tr><td>Decrease</td><td>476 (23.1)</td></tr><tr><td>Same</td><td>978 (47.5)</td></tr><tr><td colspan="2"><b>Smoking</b></td></tr><tr><td>Increase</td><td>50 (21.0)</td></tr><tr><td>Decrease</td><td>93 (39.1)</td></tr><tr><td>Same</td><td>95 (39.9)</td></tr></table><br><b>Tables A1–A3, and A4: Logistic regressions describing the association between unhealthy lifestyle changes due to lockdown and sex/age</b> |                                                                                                                                                                                                                                                                                                                                                                                                                  | Prevalence (n (%)) | <b>Physical activity</b> |  | Increase | 340 (16.5) | Decrease | 618 (30.0) | Same | 1,102 (53.5) | <b>Food intake</b> |  | Increase | 655 (31.8) | Decrease | 344 (16.7) | Same | 1,061 (51.5) | <b>Weight</b> |  | Increase | 606 (29.4) | Decrease | 476 (23.1) | Same | 978 (47.5) | <b>Smoking</b> |  | Increase | 50 (21.0) | Decrease | 93 (39.1) | Same | 95 (39.9) | <b>Overall study quality:</b><br>High risk<br><b>Conflict of interest</b><br>Stated (none declared)<br><b>Funding:</b><br>None<br><br>+ ethical approval from the Research and Ethics Committee at the University of Sharjah<br>+ questionnaire link was distributed to 13,500 adults via emails and mobile messages (list of email addresses and phone numbers was obtained from the database of the Supreme Council for Family Affairs, Health promotion Department, Sharjah and their network in the various Emirates of the United Arab Emirates) |
|                                               | Prevalence (n (%))                                                                                                                                                                                                                                |                                                                                                                                                                                                                                                                                                                                                                                                                                                                  |                                                                                                                                                   |                                                                                                                                                                                                                                                  |                                                                                                                                                                                                                                                                                                                                                                                                                                                                                                                                                                                                                                                                                                                                                                                                                                                                                                                                                                                                                                  |                                                                                                                                                                                                                                                                                                                                                                                                                  |                    |                          |  |          |            |          |            |      |              |                    |  |          |            |          |            |      |              |               |  |          |            |          |            |      |            |                |  |          |           |          |           |      |           |                                                                                                                                                                                                                                                                                                                                                                                                                                                                                                                                                       |
| <b>Physical activity</b>                      |                                                                                                                                                                                                                                                   |                                                                                                                                                                                                                                                                                                                                                                                                                                                                  |                                                                                                                                                   |                                                                                                                                                                                                                                                  |                                                                                                                                                                                                                                                                                                                                                                                                                                                                                                                                                                                                                                                                                                                                                                                                                                                                                                                                                                                                                                  |                                                                                                                                                                                                                                                                                                                                                                                                                  |                    |                          |  |          |            |          |            |      |              |                    |  |          |            |          |            |      |              |               |  |          |            |          |            |      |            |                |  |          |           |          |           |      |           |                                                                                                                                                                                                                                                                                                                                                                                                                                                                                                                                                       |
| Increase                                      | 340 (16.5)                                                                                                                                                                                                                                        |                                                                                                                                                                                                                                                                                                                                                                                                                                                                  |                                                                                                                                                   |                                                                                                                                                                                                                                                  |                                                                                                                                                                                                                                                                                                                                                                                                                                                                                                                                                                                                                                                                                                                                                                                                                                                                                                                                                                                                                                  |                                                                                                                                                                                                                                                                                                                                                                                                                  |                    |                          |  |          |            |          |            |      |              |                    |  |          |            |          |            |      |              |               |  |          |            |          |            |      |            |                |  |          |           |          |           |      |           |                                                                                                                                                                                                                                                                                                                                                                                                                                                                                                                                                       |
| Decrease                                      | 618 (30.0)                                                                                                                                                                                                                                        |                                                                                                                                                                                                                                                                                                                                                                                                                                                                  |                                                                                                                                                   |                                                                                                                                                                                                                                                  |                                                                                                                                                                                                                                                                                                                                                                                                                                                                                                                                                                                                                                                                                                                                                                                                                                                                                                                                                                                                                                  |                                                                                                                                                                                                                                                                                                                                                                                                                  |                    |                          |  |          |            |          |            |      |              |                    |  |          |            |          |            |      |              |               |  |          |            |          |            |      |            |                |  |          |           |          |           |      |           |                                                                                                                                                                                                                                                                                                                                                                                                                                                                                                                                                       |
| Same                                          | 1,102 (53.5)                                                                                                                                                                                                                                      |                                                                                                                                                                                                                                                                                                                                                                                                                                                                  |                                                                                                                                                   |                                                                                                                                                                                                                                                  |                                                                                                                                                                                                                                                                                                                                                                                                                                                                                                                                                                                                                                                                                                                                                                                                                                                                                                                                                                                                                                  |                                                                                                                                                                                                                                                                                                                                                                                                                  |                    |                          |  |          |            |          |            |      |              |                    |  |          |            |          |            |      |              |               |  |          |            |          |            |      |            |                |  |          |           |          |           |      |           |                                                                                                                                                                                                                                                                                                                                                                                                                                                                                                                                                       |
| <b>Food intake</b>                            |                                                                                                                                                                                                                                                   |                                                                                                                                                                                                                                                                                                                                                                                                                                                                  |                                                                                                                                                   |                                                                                                                                                                                                                                                  |                                                                                                                                                                                                                                                                                                                                                                                                                                                                                                                                                                                                                                                                                                                                                                                                                                                                                                                                                                                                                                  |                                                                                                                                                                                                                                                                                                                                                                                                                  |                    |                          |  |          |            |          |            |      |              |                    |  |          |            |          |            |      |              |               |  |          |            |          |            |      |            |                |  |          |           |          |           |      |           |                                                                                                                                                                                                                                                                                                                                                                                                                                                                                                                                                       |
| Increase                                      | 655 (31.8)                                                                                                                                                                                                                                        |                                                                                                                                                                                                                                                                                                                                                                                                                                                                  |                                                                                                                                                   |                                                                                                                                                                                                                                                  |                                                                                                                                                                                                                                                                                                                                                                                                                                                                                                                                                                                                                                                                                                                                                                                                                                                                                                                                                                                                                                  |                                                                                                                                                                                                                                                                                                                                                                                                                  |                    |                          |  |          |            |          |            |      |              |                    |  |          |            |          |            |      |              |               |  |          |            |          |            |      |            |                |  |          |           |          |           |      |           |                                                                                                                                                                                                                                                                                                                                                                                                                                                                                                                                                       |
| Decrease                                      | 344 (16.7)                                                                                                                                                                                                                                        |                                                                                                                                                                                                                                                                                                                                                                                                                                                                  |                                                                                                                                                   |                                                                                                                                                                                                                                                  |                                                                                                                                                                                                                                                                                                                                                                                                                                                                                                                                                                                                                                                                                                                                                                                                                                                                                                                                                                                                                                  |                                                                                                                                                                                                                                                                                                                                                                                                                  |                    |                          |  |          |            |          |            |      |              |                    |  |          |            |          |            |      |              |               |  |          |            |          |            |      |            |                |  |          |           |          |           |      |           |                                                                                                                                                                                                                                                                                                                                                                                                                                                                                                                                                       |
| Same                                          | 1,061 (51.5)                                                                                                                                                                                                                                      |                                                                                                                                                                                                                                                                                                                                                                                                                                                                  |                                                                                                                                                   |                                                                                                                                                                                                                                                  |                                                                                                                                                                                                                                                                                                                                                                                                                                                                                                                                                                                                                                                                                                                                                                                                                                                                                                                                                                                                                                  |                                                                                                                                                                                                                                                                                                                                                                                                                  |                    |                          |  |          |            |          |            |      |              |                    |  |          |            |          |            |      |              |               |  |          |            |          |            |      |            |                |  |          |           |          |           |      |           |                                                                                                                                                                                                                                                                                                                                                                                                                                                                                                                                                       |
| <b>Weight</b>                                 |                                                                                                                                                                                                                                                   |                                                                                                                                                                                                                                                                                                                                                                                                                                                                  |                                                                                                                                                   |                                                                                                                                                                                                                                                  |                                                                                                                                                                                                                                                                                                                                                                                                                                                                                                                                                                                                                                                                                                                                                                                                                                                                                                                                                                                                                                  |                                                                                                                                                                                                                                                                                                                                                                                                                  |                    |                          |  |          |            |          |            |      |              |                    |  |          |            |          |            |      |              |               |  |          |            |          |            |      |            |                |  |          |           |          |           |      |           |                                                                                                                                                                                                                                                                                                                                                                                                                                                                                                                                                       |
| Increase                                      | 606 (29.4)                                                                                                                                                                                                                                        |                                                                                                                                                                                                                                                                                                                                                                                                                                                                  |                                                                                                                                                   |                                                                                                                                                                                                                                                  |                                                                                                                                                                                                                                                                                                                                                                                                                                                                                                                                                                                                                                                                                                                                                                                                                                                                                                                                                                                                                                  |                                                                                                                                                                                                                                                                                                                                                                                                                  |                    |                          |  |          |            |          |            |      |              |                    |  |          |            |          |            |      |              |               |  |          |            |          |            |      |            |                |  |          |           |          |           |      |           |                                                                                                                                                                                                                                                                                                                                                                                                                                                                                                                                                       |
| Decrease                                      | 476 (23.1)                                                                                                                                                                                                                                        |                                                                                                                                                                                                                                                                                                                                                                                                                                                                  |                                                                                                                                                   |                                                                                                                                                                                                                                                  |                                                                                                                                                                                                                                                                                                                                                                                                                                                                                                                                                                                                                                                                                                                                                                                                                                                                                                                                                                                                                                  |                                                                                                                                                                                                                                                                                                                                                                                                                  |                    |                          |  |          |            |          |            |      |              |                    |  |          |            |          |            |      |              |               |  |          |            |          |            |      |            |                |  |          |           |          |           |      |           |                                                                                                                                                                                                                                                                                                                                                                                                                                                                                                                                                       |
| Same                                          | 978 (47.5)                                                                                                                                                                                                                                        |                                                                                                                                                                                                                                                                                                                                                                                                                                                                  |                                                                                                                                                   |                                                                                                                                                                                                                                                  |                                                                                                                                                                                                                                                                                                                                                                                                                                                                                                                                                                                                                                                                                                                                                                                                                                                                                                                                                                                                                                  |                                                                                                                                                                                                                                                                                                                                                                                                                  |                    |                          |  |          |            |          |            |      |              |                    |  |          |            |          |            |      |              |               |  |          |            |          |            |      |            |                |  |          |           |          |           |      |           |                                                                                                                                                                                                                                                                                                                                                                                                                                                                                                                                                       |
| <b>Smoking</b>                                |                                                                                                                                                                                                                                                   |                                                                                                                                                                                                                                                                                                                                                                                                                                                                  |                                                                                                                                                   |                                                                                                                                                                                                                                                  |                                                                                                                                                                                                                                                                                                                                                                                                                                                                                                                                                                                                                                                                                                                                                                                                                                                                                                                                                                                                                                  |                                                                                                                                                                                                                                                                                                                                                                                                                  |                    |                          |  |          |            |          |            |      |              |                    |  |          |            |          |            |      |              |               |  |          |            |          |            |      |            |                |  |          |           |          |           |      |           |                                                                                                                                                                                                                                                                                                                                                                                                                                                                                                                                                       |
| Increase                                      | 50 (21.0)                                                                                                                                                                                                                                         |                                                                                                                                                                                                                                                                                                                                                                                                                                                                  |                                                                                                                                                   |                                                                                                                                                                                                                                                  |                                                                                                                                                                                                                                                                                                                                                                                                                                                                                                                                                                                                                                                                                                                                                                                                                                                                                                                                                                                                                                  |                                                                                                                                                                                                                                                                                                                                                                                                                  |                    |                          |  |          |            |          |            |      |              |                    |  |          |            |          |            |      |              |               |  |          |            |          |            |      |            |                |  |          |           |          |           |      |           |                                                                                                                                                                                                                                                                                                                                                                                                                                                                                                                                                       |
| Decrease                                      | 93 (39.1)                                                                                                                                                                                                                                         |                                                                                                                                                                                                                                                                                                                                                                                                                                                                  |                                                                                                                                                   |                                                                                                                                                                                                                                                  |                                                                                                                                                                                                                                                                                                                                                                                                                                                                                                                                                                                                                                                                                                                                                                                                                                                                                                                                                                                                                                  |                                                                                                                                                                                                                                                                                                                                                                                                                  |                    |                          |  |          |            |          |            |      |              |                    |  |          |            |          |            |      |              |               |  |          |            |          |            |      |            |                |  |          |           |          |           |      |           |                                                                                                                                                                                                                                                                                                                                                                                                                                                                                                                                                       |
| Same                                          | 95 (39.9)                                                                                                                                                                                                                                         |                                                                                                                                                                                                                                                                                                                                                                                                                                                                  |                                                                                                                                                   |                                                                                                                                                                                                                                                  |                                                                                                                                                                                                                                                                                                                                                                                                                                                                                                                                                                                                                                                                                                                                                                                                                                                                                                                                                                                                                                  |                                                                                                                                                                                                                                                                                                                                                                                                                  |                    |                          |  |          |            |          |            |      |              |                    |  |          |            |          |            |      |              |               |  |          |            |          |            |      |            |                |  |          |           |          |           |      |           |                                                                                                                                                                                                                                                                                                                                                                                                                                                                                                                                                       |

| Reference<br>(First author, publication year)     | General<br>(Study design<br>Study name<br>Country of study<br>Time of study<br>No. of waves<br>Follow-up duration<br>(e.g., mean, range))                            | Population<br>(Description<br>Inclusion criteria<br># invited<br># baseline<br># follow-up<br>Age at baseline<br>% females<br>Response<br>Lost to follow-up)               | Exposure<br>(Description & assessment)          | Outcome<br>(Description & assessment)                                                                                                                               | Results<br>(Description of all topically relevant results)                                                                                                                                                                                                                                                                                                                                                                                                                                                                                                                                                                                                                                                                                                                                                                                                                                                                                                                                                                                                                                                                                                                                                                                                                                                                                                                                                                                                                                                                                                                                     | Comments<br>(study quality [overall assessment according to Iljaz/Shamliyan/SIGN/CASP]<br>Conflict of interest [stated vs. not stated]<br>Funding (public, non-profit, commercial)<br>Strengths (+) and weaknesses (-)) |  |                |                       |  |  |                                  |       |           |           |                  |     |                                                   |           |             |                  |            |                  |                  |  |  |                                                                                                                                                                                                                    |       |           |         |                  |     |             |           |             |                  |            |                  |                             |  |  |     |       |           |         |                  |     |             |           |             |                  |            |                  |                   |  |  |     |       |           |         |                  |     |             |           |             |                  |            |                  |                                                                                                                                                                                                                                                                                                                                 |
|---------------------------------------------------|----------------------------------------------------------------------------------------------------------------------------------------------------------------------|----------------------------------------------------------------------------------------------------------------------------------------------------------------------------|-------------------------------------------------|---------------------------------------------------------------------------------------------------------------------------------------------------------------------|------------------------------------------------------------------------------------------------------------------------------------------------------------------------------------------------------------------------------------------------------------------------------------------------------------------------------------------------------------------------------------------------------------------------------------------------------------------------------------------------------------------------------------------------------------------------------------------------------------------------------------------------------------------------------------------------------------------------------------------------------------------------------------------------------------------------------------------------------------------------------------------------------------------------------------------------------------------------------------------------------------------------------------------------------------------------------------------------------------------------------------------------------------------------------------------------------------------------------------------------------------------------------------------------------------------------------------------------------------------------------------------------------------------------------------------------------------------------------------------------------------------------------------------------------------------------------------------------|-------------------------------------------------------------------------------------------------------------------------------------------------------------------------------------------------------------------------|--|----------------|-----------------------|--|--|----------------------------------|-------|-----------|-----------|------------------|-----|---------------------------------------------------|-----------|-------------|------------------|------------|------------------|------------------|--|--|--------------------------------------------------------------------------------------------------------------------------------------------------------------------------------------------------------------------|-------|-----------|---------|------------------|-----|-------------|-----------|-------------|------------------|------------|------------------|-----------------------------|--|--|-----|-------|-----------|---------|------------------|-----|-------------|-----------|-------------|------------------|------------|------------------|-------------------|--|--|-----|-------|-----------|---------|------------------|-----|-------------|-----------|-------------|------------------|------------|------------------|---------------------------------------------------------------------------------------------------------------------------------------------------------------------------------------------------------------------------------------------------------------------------------------------------------------------------------|
|                                                   |                                                                                                                                                                      | n.a.                                                                                                                                                                       |                                                 |                                                                                                                                                                     | <table><tr><td colspan="2"></td><td>OR (95 % CI)</td></tr><tr><td colspan="3">Increased food intake</td></tr><tr><td rowspan="2">Sex</td><td>Males</td><td>Reference</td></tr><tr><td>Females</td><td>1.89 (1.47–2.41)</td></tr><tr><td rowspan="3">Age</td><td>18–30 years</td><td>Reference</td></tr><tr><td>31–40 years</td><td>0.69 (0.53–0.89)</td></tr><tr><td>&gt; 40 years</td><td>0.55 (0.41–0.73)</td></tr><tr><td colspan="3">Increased weight</td></tr><tr><td rowspan="2">Sex</td><td>Males</td><td>Reference</td></tr><tr><td>Females</td><td>1.89 (1.47–2.41)</td></tr><tr><td rowspan="3">Age</td><td>18–30 years</td><td>Reference</td></tr><tr><td>31–40 years</td><td>0.69 (0.53–0.89)</td></tr><tr><td>&gt; 40 years</td><td>0.55 (0.41–0.73)</td></tr><tr><td colspan="3">Decreased physical activity</td></tr><tr><td rowspan="2">Sex</td><td>Males</td><td>Reference</td></tr><tr><td>Females</td><td>1.12 (0.88–1.43)</td></tr><tr><td rowspan="3">Age</td><td>18–30 years</td><td>Reference</td></tr><tr><td>31–40 years</td><td>1.24 (0.98–1.59)</td></tr><tr><td>&gt; 40 years</td><td>1.61 (1.25–2.08)</td></tr><tr><td colspan="3">Increased smoking</td></tr><tr><td rowspan="2">Sex</td><td>Males</td><td>Reference</td></tr><tr><td>Females</td><td>0.27 (0.15–0.49)</td></tr><tr><td rowspan="3">Age</td><td>18–30 years</td><td>Reference</td></tr><tr><td>31–40 years</td><td>0.60 (0.31–1.15)</td></tr><tr><td>&gt; 40 years</td><td>0.25 (0.11–0.57)</td></tr></table> <p>Adjusted for sex, age, nationality, type of living, number of children, BMI</p> |                                                                                                                                                                                                                         |  | OR (95 % CI)   | Increased food intake |  |  | Sex                              | Males | Reference | Females   | 1.89 (1.47–2.41) | Age | 18–30 years                                       | Reference | 31–40 years | 0.69 (0.53–0.89) | > 40 years | 0.55 (0.41–0.73) | Increased weight |  |  | Sex                                                                                                                                                                                                                | Males | Reference | Females | 1.89 (1.47–2.41) | Age | 18–30 years | Reference | 31–40 years | 0.69 (0.53–0.89) | > 40 years | 0.55 (0.41–0.73) | Decreased physical activity |  |  | Sex | Males | Reference | Females | 1.12 (0.88–1.43) | Age | 18–30 years | Reference | 31–40 years | 1.24 (0.98–1.59) | > 40 years | 1.61 (1.25–2.08) | Increased smoking |  |  | Sex | Males | Reference | Females | 0.27 (0.15–0.49) | Age | 18–30 years | Reference | 31–40 years | 0.60 (0.31–1.15) | > 40 years | 0.25 (0.11–0.57) | + statistical analysis of the confounders “age” and “sex”<br><br>- low response<br>- outcome measurement with self-reported single questions<br>- self-developed questionnaire (test prior with a convenience sample)<br>- descriptive analysis of main outcomes<br>- due to study design no actual chronological investigation |
|                                                   |                                                                                                                                                                      | OR (95 % CI)                                                                                                                                                               |                                                 |                                                                                                                                                                     |                                                                                                                                                                                                                                                                                                                                                                                                                                                                                                                                                                                                                                                                                                                                                                                                                                                                                                                                                                                                                                                                                                                                                                                                                                                                                                                                                                                                                                                                                                                                                                                                |                                                                                                                                                                                                                         |  |                |                       |  |  |                                  |       |           |           |                  |     |                                                   |           |             |                  |            |                  |                  |  |  |                                                                                                                                                                                                                    |       |           |         |                  |     |             |           |             |                  |            |                  |                             |  |  |     |       |           |         |                  |     |             |           |             |                  |            |                  |                   |  |  |     |       |           |         |                  |     |             |           |             |                  |            |                  |                                                                                                                                                                                                                                                                                                                                 |
| Increased food intake                             |                                                                                                                                                                      |                                                                                                                                                                            |                                                 |                                                                                                                                                                     |                                                                                                                                                                                                                                                                                                                                                                                                                                                                                                                                                                                                                                                                                                                                                                                                                                                                                                                                                                                                                                                                                                                                                                                                                                                                                                                                                                                                                                                                                                                                                                                                |                                                                                                                                                                                                                         |  |                |                       |  |  |                                  |       |           |           |                  |     |                                                   |           |             |                  |            |                  |                  |  |  |                                                                                                                                                                                                                    |       |           |         |                  |     |             |           |             |                  |            |                  |                             |  |  |     |       |           |         |                  |     |             |           |             |                  |            |                  |                   |  |  |     |       |           |         |                  |     |             |           |             |                  |            |                  |                                                                                                                                                                                                                                                                                                                                 |
| Sex                                               | Males                                                                                                                                                                | Reference                                                                                                                                                                  |                                                 |                                                                                                                                                                     |                                                                                                                                                                                                                                                                                                                                                                                                                                                                                                                                                                                                                                                                                                                                                                                                                                                                                                                                                                                                                                                                                                                                                                                                                                                                                                                                                                                                                                                                                                                                                                                                |                                                                                                                                                                                                                         |  |                |                       |  |  |                                  |       |           |           |                  |     |                                                   |           |             |                  |            |                  |                  |  |  |                                                                                                                                                                                                                    |       |           |         |                  |     |             |           |             |                  |            |                  |                             |  |  |     |       |           |         |                  |     |             |           |             |                  |            |                  |                   |  |  |     |       |           |         |                  |     |             |           |             |                  |            |                  |                                                                                                                                                                                                                                                                                                                                 |
|                                                   | Females                                                                                                                                                              | 1.89 (1.47–2.41)                                                                                                                                                           |                                                 |                                                                                                                                                                     |                                                                                                                                                                                                                                                                                                                                                                                                                                                                                                                                                                                                                                                                                                                                                                                                                                                                                                                                                                                                                                                                                                                                                                                                                                                                                                                                                                                                                                                                                                                                                                                                |                                                                                                                                                                                                                         |  |                |                       |  |  |                                  |       |           |           |                  |     |                                                   |           |             |                  |            |                  |                  |  |  |                                                                                                                                                                                                                    |       |           |         |                  |     |             |           |             |                  |            |                  |                             |  |  |     |       |           |         |                  |     |             |           |             |                  |            |                  |                   |  |  |     |       |           |         |                  |     |             |           |             |                  |            |                  |                                                                                                                                                                                                                                                                                                                                 |
| Age                                               | 18–30 years                                                                                                                                                          | Reference                                                                                                                                                                  |                                                 |                                                                                                                                                                     |                                                                                                                                                                                                                                                                                                                                                                                                                                                                                                                                                                                                                                                                                                                                                                                                                                                                                                                                                                                                                                                                                                                                                                                                                                                                                                                                                                                                                                                                                                                                                                                                |                                                                                                                                                                                                                         |  |                |                       |  |  |                                  |       |           |           |                  |     |                                                   |           |             |                  |            |                  |                  |  |  |                                                                                                                                                                                                                    |       |           |         |                  |     |             |           |             |                  |            |                  |                             |  |  |     |       |           |         |                  |     |             |           |             |                  |            |                  |                   |  |  |     |       |           |         |                  |     |             |           |             |                  |            |                  |                                                                                                                                                                                                                                                                                                                                 |
|                                                   | 31–40 years                                                                                                                                                          | 0.69 (0.53–0.89)                                                                                                                                                           |                                                 |                                                                                                                                                                     |                                                                                                                                                                                                                                                                                                                                                                                                                                                                                                                                                                                                                                                                                                                                                                                                                                                                                                                                                                                                                                                                                                                                                                                                                                                                                                                                                                                                                                                                                                                                                                                                |                                                                                                                                                                                                                         |  |                |                       |  |  |                                  |       |           |           |                  |     |                                                   |           |             |                  |            |                  |                  |  |  |                                                                                                                                                                                                                    |       |           |         |                  |     |             |           |             |                  |            |                  |                             |  |  |     |       |           |         |                  |     |             |           |             |                  |            |                  |                   |  |  |     |       |           |         |                  |     |             |           |             |                  |            |                  |                                                                                                                                                                                                                                                                                                                                 |
|                                                   | > 40 years                                                                                                                                                           | 0.55 (0.41–0.73)                                                                                                                                                           |                                                 |                                                                                                                                                                     |                                                                                                                                                                                                                                                                                                                                                                                                                                                                                                                                                                                                                                                                                                                                                                                                                                                                                                                                                                                                                                                                                                                                                                                                                                                                                                                                                                                                                                                                                                                                                                                                |                                                                                                                                                                                                                         |  |                |                       |  |  |                                  |       |           |           |                  |     |                                                   |           |             |                  |            |                  |                  |  |  |                                                                                                                                                                                                                    |       |           |         |                  |     |             |           |             |                  |            |                  |                             |  |  |     |       |           |         |                  |     |             |           |             |                  |            |                  |                   |  |  |     |       |           |         |                  |     |             |           |             |                  |            |                  |                                                                                                                                                                                                                                                                                                                                 |
| Increased weight                                  |                                                                                                                                                                      |                                                                                                                                                                            |                                                 |                                                                                                                                                                     |                                                                                                                                                                                                                                                                                                                                                                                                                                                                                                                                                                                                                                                                                                                                                                                                                                                                                                                                                                                                                                                                                                                                                                                                                                                                                                                                                                                                                                                                                                                                                                                                |                                                                                                                                                                                                                         |  |                |                       |  |  |                                  |       |           |           |                  |     |                                                   |           |             |                  |            |                  |                  |  |  |                                                                                                                                                                                                                    |       |           |         |                  |     |             |           |             |                  |            |                  |                             |  |  |     |       |           |         |                  |     |             |           |             |                  |            |                  |                   |  |  |     |       |           |         |                  |     |             |           |             |                  |            |                  |                                                                                                                                                                                                                                                                                                                                 |
| Sex                                               | Males                                                                                                                                                                | Reference                                                                                                                                                                  |                                                 |                                                                                                                                                                     |                                                                                                                                                                                                                                                                                                                                                                                                                                                                                                                                                                                                                                                                                                                                                                                                                                                                                                                                                                                                                                                                                                                                                                                                                                                                                                                                                                                                                                                                                                                                                                                                |                                                                                                                                                                                                                         |  |                |                       |  |  |                                  |       |           |           |                  |     |                                                   |           |             |                  |            |                  |                  |  |  |                                                                                                                                                                                                                    |       |           |         |                  |     |             |           |             |                  |            |                  |                             |  |  |     |       |           |         |                  |     |             |           |             |                  |            |                  |                   |  |  |     |       |           |         |                  |     |             |           |             |                  |            |                  |                                                                                                                                                                                                                                                                                                                                 |
|                                                   | Females                                                                                                                                                              | 1.89 (1.47–2.41)                                                                                                                                                           |                                                 |                                                                                                                                                                     |                                                                                                                                                                                                                                                                                                                                                                                                                                                                                                                                                                                                                                                                                                                                                                                                                                                                                                                                                                                                                                                                                                                                                                                                                                                                                                                                                                                                                                                                                                                                                                                                |                                                                                                                                                                                                                         |  |                |                       |  |  |                                  |       |           |           |                  |     |                                                   |           |             |                  |            |                  |                  |  |  |                                                                                                                                                                                                                    |       |           |         |                  |     |             |           |             |                  |            |                  |                             |  |  |     |       |           |         |                  |     |             |           |             |                  |            |                  |                   |  |  |     |       |           |         |                  |     |             |           |             |                  |            |                  |                                                                                                                                                                                                                                                                                                                                 |
| Age                                               | 18–30 years                                                                                                                                                          | Reference                                                                                                                                                                  |                                                 |                                                                                                                                                                     |                                                                                                                                                                                                                                                                                                                                                                                                                                                                                                                                                                                                                                                                                                                                                                                                                                                                                                                                                                                                                                                                                                                                                                                                                                                                                                                                                                                                                                                                                                                                                                                                |                                                                                                                                                                                                                         |  |                |                       |  |  |                                  |       |           |           |                  |     |                                                   |           |             |                  |            |                  |                  |  |  |                                                                                                                                                                                                                    |       |           |         |                  |     |             |           |             |                  |            |                  |                             |  |  |     |       |           |         |                  |     |             |           |             |                  |            |                  |                   |  |  |     |       |           |         |                  |     |             |           |             |                  |            |                  |                                                                                                                                                                                                                                                                                                                                 |
|                                                   | 31–40 years                                                                                                                                                          | 0.69 (0.53–0.89)                                                                                                                                                           |                                                 |                                                                                                                                                                     |                                                                                                                                                                                                                                                                                                                                                                                                                                                                                                                                                                                                                                                                                                                                                                                                                                                                                                                                                                                                                                                                                                                                                                                                                                                                                                                                                                                                                                                                                                                                                                                                |                                                                                                                                                                                                                         |  |                |                       |  |  |                                  |       |           |           |                  |     |                                                   |           |             |                  |            |                  |                  |  |  |                                                                                                                                                                                                                    |       |           |         |                  |     |             |           |             |                  |            |                  |                             |  |  |     |       |           |         |                  |     |             |           |             |                  |            |                  |                   |  |  |     |       |           |         |                  |     |             |           |             |                  |            |                  |                                                                                                                                                                                                                                                                                                                                 |
|                                                   | > 40 years                                                                                                                                                           | 0.55 (0.41–0.73)                                                                                                                                                           |                                                 |                                                                                                                                                                     |                                                                                                                                                                                                                                                                                                                                                                                                                                                                                                                                                                                                                                                                                                                                                                                                                                                                                                                                                                                                                                                                                                                                                                                                                                                                                                                                                                                                                                                                                                                                                                                                |                                                                                                                                                                                                                         |  |                |                       |  |  |                                  |       |           |           |                  |     |                                                   |           |             |                  |            |                  |                  |  |  |                                                                                                                                                                                                                    |       |           |         |                  |     |             |           |             |                  |            |                  |                             |  |  |     |       |           |         |                  |     |             |           |             |                  |            |                  |                   |  |  |     |       |           |         |                  |     |             |           |             |                  |            |                  |                                                                                                                                                                                                                                                                                                                                 |
| Decreased physical activity                       |                                                                                                                                                                      |                                                                                                                                                                            |                                                 |                                                                                                                                                                     |                                                                                                                                                                                                                                                                                                                                                                                                                                                                                                                                                                                                                                                                                                                                                                                                                                                                                                                                                                                                                                                                                                                                                                                                                                                                                                                                                                                                                                                                                                                                                                                                |                                                                                                                                                                                                                         |  |                |                       |  |  |                                  |       |           |           |                  |     |                                                   |           |             |                  |            |                  |                  |  |  |                                                                                                                                                                                                                    |       |           |         |                  |     |             |           |             |                  |            |                  |                             |  |  |     |       |           |         |                  |     |             |           |             |                  |            |                  |                   |  |  |     |       |           |         |                  |     |             |           |             |                  |            |                  |                                                                                                                                                                                                                                                                                                                                 |
| Sex                                               | Males                                                                                                                                                                | Reference                                                                                                                                                                  |                                                 |                                                                                                                                                                     |                                                                                                                                                                                                                                                                                                                                                                                                                                                                                                                                                                                                                                                                                                                                                                                                                                                                                                                                                                                                                                                                                                                                                                                                                                                                                                                                                                                                                                                                                                                                                                                                |                                                                                                                                                                                                                         |  |                |                       |  |  |                                  |       |           |           |                  |     |                                                   |           |             |                  |            |                  |                  |  |  |                                                                                                                                                                                                                    |       |           |         |                  |     |             |           |             |                  |            |                  |                             |  |  |     |       |           |         |                  |     |             |           |             |                  |            |                  |                   |  |  |     |       |           |         |                  |     |             |           |             |                  |            |                  |                                                                                                                                                                                                                                                                                                                                 |
|                                                   | Females                                                                                                                                                              | 1.12 (0.88–1.43)                                                                                                                                                           |                                                 |                                                                                                                                                                     |                                                                                                                                                                                                                                                                                                                                                                                                                                                                                                                                                                                                                                                                                                                                                                                                                                                                                                                                                                                                                                                                                                                                                                                                                                                                                                                                                                                                                                                                                                                                                                                                |                                                                                                                                                                                                                         |  |                |                       |  |  |                                  |       |           |           |                  |     |                                                   |           |             |                  |            |                  |                  |  |  |                                                                                                                                                                                                                    |       |           |         |                  |     |             |           |             |                  |            |                  |                             |  |  |     |       |           |         |                  |     |             |           |             |                  |            |                  |                   |  |  |     |       |           |         |                  |     |             |           |             |                  |            |                  |                                                                                                                                                                                                                                                                                                                                 |
| Age                                               | 18–30 years                                                                                                                                                          | Reference                                                                                                                                                                  |                                                 |                                                                                                                                                                     |                                                                                                                                                                                                                                                                                                                                                                                                                                                                                                                                                                                                                                                                                                                                                                                                                                                                                                                                                                                                                                                                                                                                                                                                                                                                                                                                                                                                                                                                                                                                                                                                |                                                                                                                                                                                                                         |  |                |                       |  |  |                                  |       |           |           |                  |     |                                                   |           |             |                  |            |                  |                  |  |  |                                                                                                                                                                                                                    |       |           |         |                  |     |             |           |             |                  |            |                  |                             |  |  |     |       |           |         |                  |     |             |           |             |                  |            |                  |                   |  |  |     |       |           |         |                  |     |             |           |             |                  |            |                  |                                                                                                                                                                                                                                                                                                                                 |
|                                                   | 31–40 years                                                                                                                                                          | 1.24 (0.98–1.59)                                                                                                                                                           |                                                 |                                                                                                                                                                     |                                                                                                                                                                                                                                                                                                                                                                                                                                                                                                                                                                                                                                                                                                                                                                                                                                                                                                                                                                                                                                                                                                                                                                                                                                                                                                                                                                                                                                                                                                                                                                                                |                                                                                                                                                                                                                         |  |                |                       |  |  |                                  |       |           |           |                  |     |                                                   |           |             |                  |            |                  |                  |  |  |                                                                                                                                                                                                                    |       |           |         |                  |     |             |           |             |                  |            |                  |                             |  |  |     |       |           |         |                  |     |             |           |             |                  |            |                  |                   |  |  |     |       |           |         |                  |     |             |           |             |                  |            |                  |                                                                                                                                                                                                                                                                                                                                 |
|                                                   | > 40 years                                                                                                                                                           | 1.61 (1.25–2.08)                                                                                                                                                           |                                                 |                                                                                                                                                                     |                                                                                                                                                                                                                                                                                                                                                                                                                                                                                                                                                                                                                                                                                                                                                                                                                                                                                                                                                                                                                                                                                                                                                                                                                                                                                                                                                                                                                                                                                                                                                                                                |                                                                                                                                                                                                                         |  |                |                       |  |  |                                  |       |           |           |                  |     |                                                   |           |             |                  |            |                  |                  |  |  |                                                                                                                                                                                                                    |       |           |         |                  |     |             |           |             |                  |            |                  |                             |  |  |     |       |           |         |                  |     |             |           |             |                  |            |                  |                   |  |  |     |       |           |         |                  |     |             |           |             |                  |            |                  |                                                                                                                                                                                                                                                                                                                                 |
| Increased smoking                                 |                                                                                                                                                                      |                                                                                                                                                                            |                                                 |                                                                                                                                                                     |                                                                                                                                                                                                                                                                                                                                                                                                                                                                                                                                                                                                                                                                                                                                                                                                                                                                                                                                                                                                                                                                                                                                                                                                                                                                                                                                                                                                                                                                                                                                                                                                |                                                                                                                                                                                                                         |  |                |                       |  |  |                                  |       |           |           |                  |     |                                                   |           |             |                  |            |                  |                  |  |  |                                                                                                                                                                                                                    |       |           |         |                  |     |             |           |             |                  |            |                  |                             |  |  |     |       |           |         |                  |     |             |           |             |                  |            |                  |                   |  |  |     |       |           |         |                  |     |             |           |             |                  |            |                  |                                                                                                                                                                                                                                                                                                                                 |
| Sex                                               | Males                                                                                                                                                                | Reference                                                                                                                                                                  |                                                 |                                                                                                                                                                     |                                                                                                                                                                                                                                                                                                                                                                                                                                                                                                                                                                                                                                                                                                                                                                                                                                                                                                                                                                                                                                                                                                                                                                                                                                                                                                                                                                                                                                                                                                                                                                                                |                                                                                                                                                                                                                         |  |                |                       |  |  |                                  |       |           |           |                  |     |                                                   |           |             |                  |            |                  |                  |  |  |                                                                                                                                                                                                                    |       |           |         |                  |     |             |           |             |                  |            |                  |                             |  |  |     |       |           |         |                  |     |             |           |             |                  |            |                  |                   |  |  |     |       |           |         |                  |     |             |           |             |                  |            |                  |                                                                                                                                                                                                                                                                                                                                 |
|                                                   | Females                                                                                                                                                              | 0.27 (0.15–0.49)                                                                                                                                                           |                                                 |                                                                                                                                                                     |                                                                                                                                                                                                                                                                                                                                                                                                                                                                                                                                                                                                                                                                                                                                                                                                                                                                                                                                                                                                                                                                                                                                                                                                                                                                                                                                                                                                                                                                                                                                                                                                |                                                                                                                                                                                                                         |  |                |                       |  |  |                                  |       |           |           |                  |     |                                                   |           |             |                  |            |                  |                  |  |  |                                                                                                                                                                                                                    |       |           |         |                  |     |             |           |             |                  |            |                  |                             |  |  |     |       |           |         |                  |     |             |           |             |                  |            |                  |                   |  |  |     |       |           |         |                  |     |             |           |             |                  |            |                  |                                                                                                                                                                                                                                                                                                                                 |
| Age                                               | 18–30 years                                                                                                                                                          | Reference                                                                                                                                                                  |                                                 |                                                                                                                                                                     |                                                                                                                                                                                                                                                                                                                                                                                                                                                                                                                                                                                                                                                                                                                                                                                                                                                                                                                                                                                                                                                                                                                                                                                                                                                                                                                                                                                                                                                                                                                                                                                                |                                                                                                                                                                                                                         |  |                |                       |  |  |                                  |       |           |           |                  |     |                                                   |           |             |                  |            |                  |                  |  |  |                                                                                                                                                                                                                    |       |           |         |                  |     |             |           |             |                  |            |                  |                             |  |  |     |       |           |         |                  |     |             |           |             |                  |            |                  |                   |  |  |     |       |           |         |                  |     |             |           |             |                  |            |                  |                                                                                                                                                                                                                                                                                                                                 |
|                                                   | 31–40 years                                                                                                                                                          | 0.60 (0.31–1.15)                                                                                                                                                           |                                                 |                                                                                                                                                                     |                                                                                                                                                                                                                                                                                                                                                                                                                                                                                                                                                                                                                                                                                                                                                                                                                                                                                                                                                                                                                                                                                                                                                                                                                                                                                                                                                                                                                                                                                                                                                                                                |                                                                                                                                                                                                                         |  |                |                       |  |  |                                  |       |           |           |                  |     |                                                   |           |             |                  |            |                  |                  |  |  |                                                                                                                                                                                                                    |       |           |         |                  |     |             |           |             |                  |            |                  |                             |  |  |     |       |           |         |                  |     |             |           |             |                  |            |                  |                   |  |  |     |       |           |         |                  |     |             |           |             |                  |            |                  |                                                                                                                                                                                                                                                                                                                                 |
|                                                   | > 40 years                                                                                                                                                           | 0.25 (0.11–0.57)                                                                                                                                                           |                                                 |                                                                                                                                                                     |                                                                                                                                                                                                                                                                                                                                                                                                                                                                                                                                                                                                                                                                                                                                                                                                                                                                                                                                                                                                                                                                                                                                                                                                                                                                                                                                                                                                                                                                                                                                                                                                |                                                                                                                                                                                                                         |  |                |                       |  |  |                                  |       |           |           |                  |     |                                                   |           |             |                  |            |                  |                  |  |  |                                                                                                                                                                                                                    |       |           |         |                  |     |             |           |             |                  |            |                  |                             |  |  |     |       |           |         |                  |     |             |           |             |                  |            |                  |                   |  |  |     |       |           |         |                  |     |             |           |             |                  |            |                  |                                                                                                                                                                                                                                                                                                                                 |
| Sasaki et al., 2021                               | <b>Study design:</b> Cross-sectional study<br><b>Study name:</b> n.a.<br><b>Country of study:</b> Japan<br><b>Time of study:</b> August 2020<br><b>No. of waves:</b> | <b>Description:</b> Older adults (60–95 years)<br><b>Inclusion criteria:</b> n.r.<br><b># invited:</b> n = 2,008<br><b># baseline:</b> n =1,493<br>n = 999 (full data set) | <b>COVID-19-related distancing restrictions</b> | <b>(Change in) physical activity:</b><br>International Physical Activity Questionnaire Short Form (IPAQ-SF)<br><br>Classification:<br>- low physical activity (LPA) | <b>Table 2: Descriptive statistics for the change in physical activity since lockdown</b> <table><tr><td colspan="2"></td><td>Prevalence (%)</td></tr><tr><td colspan="3"><b>Men</b></td></tr><tr><td>Maintained low physical activity</td><td></td><td>34.4</td></tr><tr><td>Decreased</td><td></td><td>4.6</td></tr><tr><td>Maintained moderate-to-vigorous physical activity</td><td></td><td>59.1</td></tr><tr><td>Increased</td><td></td><td>1.9</td></tr><tr><td colspan="3"><b>Women</b></td></tr></table>                                                                                                                                                                                                                                                                                                                                                                                                                                                                                                                                                                                                                                                                                                                                                                                                                                                                                                                                                                                                                                                                              |                                                                                                                                                                                                                         |  | Prevalence (%) | <b>Men</b>            |  |  | Maintained low physical activity |       | 34.4      | Decreased |                  | 4.6 | Maintained moderate-to-vigorous physical activity |           | 59.1        | Increased        |            | 1.9              | <b>Women</b>     |  |  | <b>Overall study quality:</b> High risk<br><b>Conflict of interest</b> Stated (none declared)<br><b>Funding:</b> None<br><br>+ ethical approval from the institutional ethics board for epidemiological studies of |       |           |         |                  |     |             |           |             |                  |            |                  |                             |  |  |     |       |           |         |                  |     |             |           |             |                  |            |                  |                   |  |  |     |       |           |         |                  |     |             |           |             |                  |            |                  |                                                                                                                                                                                                                                                                                                                                 |
|                                                   |                                                                                                                                                                      | Prevalence (%)                                                                                                                                                             |                                                 |                                                                                                                                                                     |                                                                                                                                                                                                                                                                                                                                                                                                                                                                                                                                                                                                                                                                                                                                                                                                                                                                                                                                                                                                                                                                                                                                                                                                                                                                                                                                                                                                                                                                                                                                                                                                |                                                                                                                                                                                                                         |  |                |                       |  |  |                                  |       |           |           |                  |     |                                                   |           |             |                  |            |                  |                  |  |  |                                                                                                                                                                                                                    |       |           |         |                  |     |             |           |             |                  |            |                  |                             |  |  |     |       |           |         |                  |     |             |           |             |                  |            |                  |                   |  |  |     |       |           |         |                  |     |             |           |             |                  |            |                  |                                                                                                                                                                                                                                                                                                                                 |
| <b>Men</b>                                        |                                                                                                                                                                      |                                                                                                                                                                            |                                                 |                                                                                                                                                                     |                                                                                                                                                                                                                                                                                                                                                                                                                                                                                                                                                                                                                                                                                                                                                                                                                                                                                                                                                                                                                                                                                                                                                                                                                                                                                                                                                                                                                                                                                                                                                                                                |                                                                                                                                                                                                                         |  |                |                       |  |  |                                  |       |           |           |                  |     |                                                   |           |             |                  |            |                  |                  |  |  |                                                                                                                                                                                                                    |       |           |         |                  |     |             |           |             |                  |            |                  |                             |  |  |     |       |           |         |                  |     |             |           |             |                  |            |                  |                   |  |  |     |       |           |         |                  |     |             |           |             |                  |            |                  |                                                                                                                                                                                                                                                                                                                                 |
| Maintained low physical activity                  |                                                                                                                                                                      | 34.4                                                                                                                                                                       |                                                 |                                                                                                                                                                     |                                                                                                                                                                                                                                                                                                                                                                                                                                                                                                                                                                                                                                                                                                                                                                                                                                                                                                                                                                                                                                                                                                                                                                                                                                                                                                                                                                                                                                                                                                                                                                                                |                                                                                                                                                                                                                         |  |                |                       |  |  |                                  |       |           |           |                  |     |                                                   |           |             |                  |            |                  |                  |  |  |                                                                                                                                                                                                                    |       |           |         |                  |     |             |           |             |                  |            |                  |                             |  |  |     |       |           |         |                  |     |             |           |             |                  |            |                  |                   |  |  |     |       |           |         |                  |     |             |           |             |                  |            |                  |                                                                                                                                                                                                                                                                                                                                 |
| Decreased                                         |                                                                                                                                                                      | 4.6                                                                                                                                                                        |                                                 |                                                                                                                                                                     |                                                                                                                                                                                                                                                                                                                                                                                                                                                                                                                                                                                                                                                                                                                                                                                                                                                                                                                                                                                                                                                                                                                                                                                                                                                                                                                                                                                                                                                                                                                                                                                                |                                                                                                                                                                                                                         |  |                |                       |  |  |                                  |       |           |           |                  |     |                                                   |           |             |                  |            |                  |                  |  |  |                                                                                                                                                                                                                    |       |           |         |                  |     |             |           |             |                  |            |                  |                             |  |  |     |       |           |         |                  |     |             |           |             |                  |            |                  |                   |  |  |     |       |           |         |                  |     |             |           |             |                  |            |                  |                                                                                                                                                                                                                                                                                                                                 |
| Maintained moderate-to-vigorous physical activity |                                                                                                                                                                      | 59.1                                                                                                                                                                       |                                                 |                                                                                                                                                                     |                                                                                                                                                                                                                                                                                                                                                                                                                                                                                                                                                                                                                                                                                                                                                                                                                                                                                                                                                                                                                                                                                                                                                                                                                                                                                                                                                                                                                                                                                                                                                                                                |                                                                                                                                                                                                                         |  |                |                       |  |  |                                  |       |           |           |                  |     |                                                   |           |             |                  |            |                  |                  |  |  |                                                                                                                                                                                                                    |       |           |         |                  |     |             |           |             |                  |            |                  |                             |  |  |     |       |           |         |                  |     |             |           |             |                  |            |                  |                   |  |  |     |       |           |         |                  |     |             |           |             |                  |            |                  |                                                                                                                                                                                                                                                                                                                                 |
| Increased                                         |                                                                                                                                                                      | 1.9                                                                                                                                                                        |                                                 |                                                                                                                                                                     |                                                                                                                                                                                                                                                                                                                                                                                                                                                                                                                                                                                                                                                                                                                                                                                                                                                                                                                                                                                                                                                                                                                                                                                                                                                                                                                                                                                                                                                                                                                                                                                                |                                                                                                                                                                                                                         |  |                |                       |  |  |                                  |       |           |           |                  |     |                                                   |           |             |                  |            |                  |                  |  |  |                                                                                                                                                                                                                    |       |           |         |                  |     |             |           |             |                  |            |                  |                             |  |  |     |       |           |         |                  |     |             |           |             |                  |            |                  |                   |  |  |     |       |           |         |                  |     |             |           |             |                  |            |                  |                                                                                                                                                                                                                                                                                                                                 |
| <b>Women</b>                                      |                                                                                                                                                                      |                                                                                                                                                                            |                                                 |                                                                                                                                                                     |                                                                                                                                                                                                                                                                                                                                                                                                                                                                                                                                                                                                                                                                                                                                                                                                                                                                                                                                                                                                                                                                                                                                                                                                                                                                                                                                                                                                                                                                                                                                                                                                |                                                                                                                                                                                                                         |  |                |                       |  |  |                                  |       |           |           |                  |     |                                                   |           |             |                  |            |                  |                  |  |  |                                                                                                                                                                                                                    |       |           |         |                  |     |             |           |             |                  |            |                  |                             |  |  |     |       |           |         |                  |     |             |           |             |                  |            |                  |                   |  |  |     |       |           |         |                  |     |             |           |             |                  |            |                  |                                                                                                                                                                                                                                                                                                                                 |

| Reference<br>(First author, publication year)     | General<br>(Study design<br>Study name<br>Country of study<br>Time of study<br>No. of waves<br>Follow-up duration<br>(e.g., mean, range)) | Population<br>(Description<br>Inclusion criteria<br># invited<br># baseline<br># follow-up<br>Age at baseline<br>% females<br>Response<br>Lost to follow-up)                                               | Exposure<br>(Description & assessment) | Outcome<br>(Description & assessment)                                                                                                                                                                                                               | Results<br>(Description of all topically relevant results)                                                                                                                                                                                                                                                                                                                                                                                                                                                                                                                                                                                                                                                                                                                                                                                                                                                                                                                                                                                                                                                                                                                                                                                                                                                                                                                                                                                                                                               | Comments<br>(study quality [overall assessment according to Iljaz/Shamliyan/SIGN/CASP]<br>Conflict of interest [stated vs. not stated]<br>Funding (public, non-profit, commercial)<br>Strengths (+) and weaknesses (-)) |      |           |     |                                                   |      |           |     |  |                                        |                                       |          |            |  |  |  |                          |                    |                    |       |                          |                    |                    |        |               |                   |                   |        |                               |                    |                    |        |                            |                  |                  |         |              |  |  |  |                          |                   |                   |      |                          |                   |                   |        |               |                  |                  |         |                                                                                                                                                                                                                                                                                                                                                                                                                                                                                                                                       |
|---------------------------------------------------|-------------------------------------------------------------------------------------------------------------------------------------------|------------------------------------------------------------------------------------------------------------------------------------------------------------------------------------------------------------|----------------------------------------|-----------------------------------------------------------------------------------------------------------------------------------------------------------------------------------------------------------------------------------------------------|----------------------------------------------------------------------------------------------------------------------------------------------------------------------------------------------------------------------------------------------------------------------------------------------------------------------------------------------------------------------------------------------------------------------------------------------------------------------------------------------------------------------------------------------------------------------------------------------------------------------------------------------------------------------------------------------------------------------------------------------------------------------------------------------------------------------------------------------------------------------------------------------------------------------------------------------------------------------------------------------------------------------------------------------------------------------------------------------------------------------------------------------------------------------------------------------------------------------------------------------------------------------------------------------------------------------------------------------------------------------------------------------------------------------------------------------------------------------------------------------------------|-------------------------------------------------------------------------------------------------------------------------------------------------------------------------------------------------------------------------|------|-----------|-----|---------------------------------------------------|------|-----------|-----|--|----------------------------------------|---------------------------------------|----------|------------|--|--|--|--------------------------|--------------------|--------------------|-------|--------------------------|--------------------|--------------------|--------|---------------|-------------------|-------------------|--------|-------------------------------|--------------------|--------------------|--------|----------------------------|------------------|------------------|---------|--------------|--|--|--|--------------------------|-------------------|-------------------|------|--------------------------|-------------------|-------------------|--------|---------------|------------------|------------------|---------|---------------------------------------------------------------------------------------------------------------------------------------------------------------------------------------------------------------------------------------------------------------------------------------------------------------------------------------------------------------------------------------------------------------------------------------------------------------------------------------------------------------------------------------|
|                                                   | <i>n</i> = 1<br><b>Follow-up duration:</b><br>n.a.                                                                                        | <b># follow-up:</b><br>n.a.<br><b>Age at baseline:</b><br>M: 74.5 years (SD: 6.3)<br><b>% females:</b><br>53.8 %<br><b>Response:</b><br>74.3% (full data set: 49.8 %)<br><b>Lost to follow-up:</b><br>n.a. |                                        | - moderate-to-vigorous physical activity (MVPA)<br>- walking: 3.3 METs<br>- moderate-intensity activity: 4.0 METs<br>- vigorous activity: 8.0 METs<br><br><b>Sitting:</b><br>International Physical Activity Questionnaire Short Form (minutes/day) | <table><tr><td>Maintained low physical activity</td><td>47.5</td></tr><tr><td>Decreased</td><td>6.0</td></tr><tr><td>Maintained moderate-to-vigorous physical activity</td><td>45.2</td></tr><tr><td>Increased</td><td>1.3</td></tr></table><br><b>Table 2: Differences in physical activity before and after the onset of COVID-19 restrictions</b> <table><tr><td></td><td><b>Before restrictions</b><br/>(M (SD))</td><td><b>After restrictions</b><br/>(M (SD))</td><td><b>p</b></td></tr><tr><td colspan="4"><b>Men</b></td></tr><tr><td>Vigorous intensity (MET)</td><td>1690.6<br/>(2668.8)</td><td>1604.8<br/>(2598.2)</td><td>0.035</td></tr><tr><td>Moderate intensity (MET)</td><td>1064.7<br/>(1332.8)</td><td>1002.6<br/>(1306.4)</td><td>0.0024</td></tr><tr><td>Walking (MET)</td><td>922.9<br/>(1035.5)</td><td>877.4<br/>(1028.9)</td><td>0.0054</td></tr><tr><td>Total physical activity (MET)</td><td>3678.2<br/>(4163.1)</td><td>3484.8<br/>(4112.3)</td><td>0.0024</td></tr><tr><td>Sitting time (minutes/day)</td><td>273.4<br/>(203.4)</td><td>287.7<br/>(204.1)</td><td>&lt; 0.001</td></tr><tr><td colspan="4"><b>Women</b></td></tr><tr><td>Vigorous intensity (MET)</td><td>742.5<br/>(1701.3)</td><td>717.5<br/>(1738.0)</td><td>0.40</td></tr><tr><td>Moderate intensity (MET)</td><td>712.5<br/>(1062.7)</td><td>644.4<br/>(1005.1)</td><td>0.0022</td></tr><tr><td>Walking (MET)</td><td>717.2<br/>(899.6)</td><td>647.2<br/>(870.5)</td><td>&lt; 0.001</td></tr></table> | Maintained low physical activity                                                                                                                                                                                        | 47.5 | Decreased | 6.0 | Maintained moderate-to-vigorous physical activity | 45.2 | Increased | 1.3 |  | <b>Before restrictions</b><br>(M (SD)) | <b>After restrictions</b><br>(M (SD)) | <b>p</b> | <b>Men</b> |  |  |  | Vigorous intensity (MET) | 1690.6<br>(2668.8) | 1604.8<br>(2598.2) | 0.035 | Moderate intensity (MET) | 1064.7<br>(1332.8) | 1002.6<br>(1306.4) | 0.0024 | Walking (MET) | 922.9<br>(1035.5) | 877.4<br>(1028.9) | 0.0054 | Total physical activity (MET) | 3678.2<br>(4163.1) | 3484.8<br>(4112.3) | 0.0024 | Sitting time (minutes/day) | 273.4<br>(203.4) | 287.7<br>(204.1) | < 0.001 | <b>Women</b> |  |  |  | Vigorous intensity (MET) | 742.5<br>(1701.3) | 717.5<br>(1738.0) | 0.40 | Moderate intensity (MET) | 712.5<br>(1062.7) | 644.4<br>(1005.1) | 0.0022 | Walking (MET) | 717.2<br>(899.6) | 647.2<br>(870.5) | < 0.001 | the Hokkaido Bunkyo University<br>+ stratified sampling method (random selection in terms of sex, age, residence, and social participation), based on the list held by Eniwa City Hall<br>+ high response<br>+ validated outcome measurement<br>+ using paired t-test or McNemar's test to investigate differences<br>+ statistical analysis of the confounder "sex" (by stratification)<br><br>- no consideration of the confounder "age" in the statistical analysis<br>- due to study design no actual chronological investigation |
| Maintained low physical activity                  | 47.5                                                                                                                                      |                                                                                                                                                                                                            |                                        |                                                                                                                                                                                                                                                     |                                                                                                                                                                                                                                                                                                                                                                                                                                                                                                                                                                                                                                                                                                                                                                                                                                                                                                                                                                                                                                                                                                                                                                                                                                                                                                                                                                                                                                                                                                          |                                                                                                                                                                                                                         |      |           |     |                                                   |      |           |     |  |                                        |                                       |          |            |  |  |  |                          |                    |                    |       |                          |                    |                    |        |               |                   |                   |        |                               |                    |                    |        |                            |                  |                  |         |              |  |  |  |                          |                   |                   |      |                          |                   |                   |        |               |                  |                  |         |                                                                                                                                                                                                                                                                                                                                                                                                                                                                                                                                       |
| Decreased                                         | 6.0                                                                                                                                       |                                                                                                                                                                                                            |                                        |                                                                                                                                                                                                                                                     |                                                                                                                                                                                                                                                                                                                                                                                                                                                                                                                                                                                                                                                                                                                                                                                                                                                                                                                                                                                                                                                                                                                                                                                                                                                                                                                                                                                                                                                                                                          |                                                                                                                                                                                                                         |      |           |     |                                                   |      |           |     |  |                                        |                                       |          |            |  |  |  |                          |                    |                    |       |                          |                    |                    |        |               |                   |                   |        |                               |                    |                    |        |                            |                  |                  |         |              |  |  |  |                          |                   |                   |      |                          |                   |                   |        |               |                  |                  |         |                                                                                                                                                                                                                                                                                                                                                                                                                                                                                                                                       |
| Maintained moderate-to-vigorous physical activity | 45.2                                                                                                                                      |                                                                                                                                                                                                            |                                        |                                                                                                                                                                                                                                                     |                                                                                                                                                                                                                                                                                                                                                                                                                                                                                                                                                                                                                                                                                                                                                                                                                                                                                                                                                                                                                                                                                                                                                                                                                                                                                                                                                                                                                                                                                                          |                                                                                                                                                                                                                         |      |           |     |                                                   |      |           |     |  |                                        |                                       |          |            |  |  |  |                          |                    |                    |       |                          |                    |                    |        |               |                   |                   |        |                               |                    |                    |        |                            |                  |                  |         |              |  |  |  |                          |                   |                   |      |                          |                   |                   |        |               |                  |                  |         |                                                                                                                                                                                                                                                                                                                                                                                                                                                                                                                                       |
| Increased                                         | 1.3                                                                                                                                       |                                                                                                                                                                                                            |                                        |                                                                                                                                                                                                                                                     |                                                                                                                                                                                                                                                                                                                                                                                                                                                                                                                                                                                                                                                                                                                                                                                                                                                                                                                                                                                                                                                                                                                                                                                                                                                                                                                                                                                                                                                                                                          |                                                                                                                                                                                                                         |      |           |     |                                                   |      |           |     |  |                                        |                                       |          |            |  |  |  |                          |                    |                    |       |                          |                    |                    |        |               |                   |                   |        |                               |                    |                    |        |                            |                  |                  |         |              |  |  |  |                          |                   |                   |      |                          |                   |                   |        |               |                  |                  |         |                                                                                                                                                                                                                                                                                                                                                                                                                                                                                                                                       |
|                                                   | <b>Before restrictions</b><br>(M (SD))                                                                                                    | <b>After restrictions</b><br>(M (SD))                                                                                                                                                                      | <b>p</b>                               |                                                                                                                                                                                                                                                     |                                                                                                                                                                                                                                                                                                                                                                                                                                                                                                                                                                                                                                                                                                                                                                                                                                                                                                                                                                                                                                                                                                                                                                                                                                                                                                                                                                                                                                                                                                          |                                                                                                                                                                                                                         |      |           |     |                                                   |      |           |     |  |                                        |                                       |          |            |  |  |  |                          |                    |                    |       |                          |                    |                    |        |               |                   |                   |        |                               |                    |                    |        |                            |                  |                  |         |              |  |  |  |                          |                   |                   |      |                          |                   |                   |        |               |                  |                  |         |                                                                                                                                                                                                                                                                                                                                                                                                                                                                                                                                       |
| <b>Men</b>                                        |                                                                                                                                           |                                                                                                                                                                                                            |                                        |                                                                                                                                                                                                                                                     |                                                                                                                                                                                                                                                                                                                                                                                                                                                                                                                                                                                                                                                                                                                                                                                                                                                                                                                                                                                                                                                                                                                                                                                                                                                                                                                                                                                                                                                                                                          |                                                                                                                                                                                                                         |      |           |     |                                                   |      |           |     |  |                                        |                                       |          |            |  |  |  |                          |                    |                    |       |                          |                    |                    |        |               |                   |                   |        |                               |                    |                    |        |                            |                  |                  |         |              |  |  |  |                          |                   |                   |      |                          |                   |                   |        |               |                  |                  |         |                                                                                                                                                                                                                                                                                                                                                                                                                                                                                                                                       |
| Vigorous intensity (MET)                          | 1690.6<br>(2668.8)                                                                                                                        | 1604.8<br>(2598.2)                                                                                                                                                                                         | 0.035                                  |                                                                                                                                                                                                                                                     |                                                                                                                                                                                                                                                                                                                                                                                                                                                                                                                                                                                                                                                                                                                                                                                                                                                                                                                                                                                                                                                                                                                                                                                                                                                                                                                                                                                                                                                                                                          |                                                                                                                                                                                                                         |      |           |     |                                                   |      |           |     |  |                                        |                                       |          |            |  |  |  |                          |                    |                    |       |                          |                    |                    |        |               |                   |                   |        |                               |                    |                    |        |                            |                  |                  |         |              |  |  |  |                          |                   |                   |      |                          |                   |                   |        |               |                  |                  |         |                                                                                                                                                                                                                                                                                                                                                                                                                                                                                                                                       |
| Moderate intensity (MET)                          | 1064.7<br>(1332.8)                                                                                                                        | 1002.6<br>(1306.4)                                                                                                                                                                                         | 0.0024                                 |                                                                                                                                                                                                                                                     |                                                                                                                                                                                                                                                                                                                                                                                                                                                                                                                                                                                                                                                                                                                                                                                                                                                                                                                                                                                                                                                                                                                                                                                                                                                                                                                                                                                                                                                                                                          |                                                                                                                                                                                                                         |      |           |     |                                                   |      |           |     |  |                                        |                                       |          |            |  |  |  |                          |                    |                    |       |                          |                    |                    |        |               |                   |                   |        |                               |                    |                    |        |                            |                  |                  |         |              |  |  |  |                          |                   |                   |      |                          |                   |                   |        |               |                  |                  |         |                                                                                                                                                                                                                                                                                                                                                                                                                                                                                                                                       |
| Walking (MET)                                     | 922.9<br>(1035.5)                                                                                                                         | 877.4<br>(1028.9)                                                                                                                                                                                          | 0.0054                                 |                                                                                                                                                                                                                                                     |                                                                                                                                                                                                                                                                                                                                                                                                                                                                                                                                                                                                                                                                                                                                                                                                                                                                                                                                                                                                                                                                                                                                                                                                                                                                                                                                                                                                                                                                                                          |                                                                                                                                                                                                                         |      |           |     |                                                   |      |           |     |  |                                        |                                       |          |            |  |  |  |                          |                    |                    |       |                          |                    |                    |        |               |                   |                   |        |                               |                    |                    |        |                            |                  |                  |         |              |  |  |  |                          |                   |                   |      |                          |                   |                   |        |               |                  |                  |         |                                                                                                                                                                                                                                                                                                                                                                                                                                                                                                                                       |
| Total physical activity (MET)                     | 3678.2<br>(4163.1)                                                                                                                        | 3484.8<br>(4112.3)                                                                                                                                                                                         | 0.0024                                 |                                                                                                                                                                                                                                                     |                                                                                                                                                                                                                                                                                                                                                                                                                                                                                                                                                                                                                                                                                                                                                                                                                                                                                                                                                                                                                                                                                                                                                                                                                                                                                                                                                                                                                                                                                                          |                                                                                                                                                                                                                         |      |           |     |                                                   |      |           |     |  |                                        |                                       |          |            |  |  |  |                          |                    |                    |       |                          |                    |                    |        |               |                   |                   |        |                               |                    |                    |        |                            |                  |                  |         |              |  |  |  |                          |                   |                   |      |                          |                   |                   |        |               |                  |                  |         |                                                                                                                                                                                                                                                                                                                                                                                                                                                                                                                                       |
| Sitting time (minutes/day)                        | 273.4<br>(203.4)                                                                                                                          | 287.7<br>(204.1)                                                                                                                                                                                           | < 0.001                                |                                                                                                                                                                                                                                                     |                                                                                                                                                                                                                                                                                                                                                                                                                                                                                                                                                                                                                                                                                                                                                                                                                                                                                                                                                                                                                                                                                                                                                                                                                                                                                                                                                                                                                                                                                                          |                                                                                                                                                                                                                         |      |           |     |                                                   |      |           |     |  |                                        |                                       |          |            |  |  |  |                          |                    |                    |       |                          |                    |                    |        |               |                   |                   |        |                               |                    |                    |        |                            |                  |                  |         |              |  |  |  |                          |                   |                   |      |                          |                   |                   |        |               |                  |                  |         |                                                                                                                                                                                                                                                                                                                                                                                                                                                                                                                                       |
| <b>Women</b>                                      |                                                                                                                                           |                                                                                                                                                                                                            |                                        |                                                                                                                                                                                                                                                     |                                                                                                                                                                                                                                                                                                                                                                                                                                                                                                                                                                                                                                                                                                                                                                                                                                                                                                                                                                                                                                                                                                                                                                                                                                                                                                                                                                                                                                                                                                          |                                                                                                                                                                                                                         |      |           |     |                                                   |      |           |     |  |                                        |                                       |          |            |  |  |  |                          |                    |                    |       |                          |                    |                    |        |               |                   |                   |        |                               |                    |                    |        |                            |                  |                  |         |              |  |  |  |                          |                   |                   |      |                          |                   |                   |        |               |                  |                  |         |                                                                                                                                                                                                                                                                                                                                                                                                                                                                                                                                       |
| Vigorous intensity (MET)                          | 742.5<br>(1701.3)                                                                                                                         | 717.5<br>(1738.0)                                                                                                                                                                                          | 0.40                                   |                                                                                                                                                                                                                                                     |                                                                                                                                                                                                                                                                                                                                                                                                                                                                                                                                                                                                                                                                                                                                                                                                                                                                                                                                                                                                                                                                                                                                                                                                                                                                                                                                                                                                                                                                                                          |                                                                                                                                                                                                                         |      |           |     |                                                   |      |           |     |  |                                        |                                       |          |            |  |  |  |                          |                    |                    |       |                          |                    |                    |        |               |                   |                   |        |                               |                    |                    |        |                            |                  |                  |         |              |  |  |  |                          |                   |                   |      |                          |                   |                   |        |               |                  |                  |         |                                                                                                                                                                                                                                                                                                                                                                                                                                                                                                                                       |
| Moderate intensity (MET)                          | 712.5<br>(1062.7)                                                                                                                         | 644.4<br>(1005.1)                                                                                                                                                                                          | 0.0022                                 |                                                                                                                                                                                                                                                     |                                                                                                                                                                                                                                                                                                                                                                                                                                                                                                                                                                                                                                                                                                                                                                                                                                                                                                                                                                                                                                                                                                                                                                                                                                                                                                                                                                                                                                                                                                          |                                                                                                                                                                                                                         |      |           |     |                                                   |      |           |     |  |                                        |                                       |          |            |  |  |  |                          |                    |                    |       |                          |                    |                    |        |               |                   |                   |        |                               |                    |                    |        |                            |                  |                  |         |              |  |  |  |                          |                   |                   |      |                          |                   |                   |        |               |                  |                  |         |                                                                                                                                                                                                                                                                                                                                                                                                                                                                                                                                       |
| Walking (MET)                                     | 717.2<br>(899.6)                                                                                                                          | 647.2<br>(870.5)                                                                                                                                                                                           | < 0.001                                |                                                                                                                                                                                                                                                     |                                                                                                                                                                                                                                                                                                                                                                                                                                                                                                                                                                                                                                                                                                                                                                                                                                                                                                                                                                                                                                                                                                                                                                                                                                                                                                                                                                                                                                                                                                          |                                                                                                                                                                                                                         |      |           |     |                                                   |      |           |     |  |                                        |                                       |          |            |  |  |  |                          |                    |                    |       |                          |                    |                    |        |               |                   |                   |        |                               |                    |                    |        |                            |                  |                  |         |              |  |  |  |                          |                   |                   |      |                          |                   |                   |        |               |                  |                  |         |                                                                                                                                                                                                                                                                                                                                                                                                                                                                                                                                       |

| Reference<br>(First author, publication year) | General<br>(Study design<br>Study name<br>Country of study<br>Time of study<br>No. of waves<br>Follow-up duration<br>(e.g., mean, range))                                                                                | Population<br>(Description<br>Inclusion criteria<br># invited<br># baseline<br># follow-up<br>Age at baseline<br>% females<br>Response<br>Lost to follow-up)                                                                                                                                                                                                                                                                                                                  | Exposure<br>(Description & assessment)                                                                                                                                                                                                                                                                                                                                                                                                                                                                                                                                                                                                                     | Outcome<br>(Description & assessment)                                                                                                         | Results<br>(Description of all topically relevant results)                                                                                                                                                                                                                                                                                                                                                                                                                                                                                                                                                                                                                                                                                                                                                                                                                                                                                                                                                                                                                                                                                                                                                                                                                    |                 |                 |         | Comments<br>(study quality [overall assessment according to Iljaz/Shamliyan/SIGN/CASP]<br>Conflict of interest [stated vs. not stated]<br>Funding (public, non-profit, commercial)<br>Strengths (+) and weaknesses (-)) |                |                                  |  |           |      |           |      |           |      |                                   |  |           |      |           |      |           |      |                            |  |           |      |           |      |           |     |                            |  |           |      |           |      |           |     |                                   |  |           |      |           |      |           |     |                        |  |           |      |           |      |                                                                                                                                                                                                                                                                                                                                                                                                                                                                                                                                                                                                                          |
|-----------------------------------------------|--------------------------------------------------------------------------------------------------------------------------------------------------------------------------------------------------------------------------|-------------------------------------------------------------------------------------------------------------------------------------------------------------------------------------------------------------------------------------------------------------------------------------------------------------------------------------------------------------------------------------------------------------------------------------------------------------------------------|------------------------------------------------------------------------------------------------------------------------------------------------------------------------------------------------------------------------------------------------------------------------------------------------------------------------------------------------------------------------------------------------------------------------------------------------------------------------------------------------------------------------------------------------------------------------------------------------------------------------------------------------------------|-----------------------------------------------------------------------------------------------------------------------------------------------|-------------------------------------------------------------------------------------------------------------------------------------------------------------------------------------------------------------------------------------------------------------------------------------------------------------------------------------------------------------------------------------------------------------------------------------------------------------------------------------------------------------------------------------------------------------------------------------------------------------------------------------------------------------------------------------------------------------------------------------------------------------------------------------------------------------------------------------------------------------------------------------------------------------------------------------------------------------------------------------------------------------------------------------------------------------------------------------------------------------------------------------------------------------------------------------------------------------------------------------------------------------------------------|-----------------|-----------------|---------|-------------------------------------------------------------------------------------------------------------------------------------------------------------------------------------------------------------------------|----------------|----------------------------------|--|-----------|------|-----------|------|-----------|------|-----------------------------------|--|-----------|------|-----------|------|-----------|------|----------------------------|--|-----------|------|-----------|------|-----------|-----|----------------------------|--|-----------|------|-----------|------|-----------|-----|-----------------------------------|--|-----------|------|-----------|------|-----------|-----|------------------------|--|-----------|------|-----------|------|--------------------------------------------------------------------------------------------------------------------------------------------------------------------------------------------------------------------------------------------------------------------------------------------------------------------------------------------------------------------------------------------------------------------------------------------------------------------------------------------------------------------------------------------------------------------------------------------------------------------------|
|                                               |                                                                                                                                                                                                                          |                                                                                                                                                                                                                                                                                                                                                                                                                                                                               |                                                                                                                                                                                                                                                                                                                                                                                                                                                                                                                                                                                                                                                            |                                                                                                                                               | Total physical activity (MET)                                                                                                                                                                                                                                                                                                                                                                                                                                                                                                                                                                                                                                                                                                                                                                                                                                                                                                                                                                                                                                                                                                                                                                                                                                                 | 2172.1 (2873.2) | 2009.2 (2876.6) | < 0.001 |                                                                                                                                                                                                                         |                |                                  |  |           |      |           |      |           |      |                                   |  |           |      |           |      |           |      |                            |  |           |      |           |      |           |     |                            |  |           |      |           |      |           |     |                                   |  |           |      |           |      |           |     |                        |  |           |      |           |      |                                                                                                                                                                                                                                                                                                                                                                                                                                                                                                                                                                                                                          |
|                                               |                                                                                                                                                                                                                          |                                                                                                                                                                                                                                                                                                                                                                                                                                                                               |                                                                                                                                                                                                                                                                                                                                                                                                                                                                                                                                                                                                                                                            |                                                                                                                                               | Sitting time (minutes/day)                                                                                                                                                                                                                                                                                                                                                                                                                                                                                                                                                                                                                                                                                                                                                                                                                                                                                                                                                                                                                                                                                                                                                                                                                                                    | 243.7 (181.5)   | 267.8 (191.6)   | < 0.001 |                                                                                                                                                                                                                         |                |                                  |  |           |      |           |      |           |      |                                   |  |           |      |           |      |           |      |                            |  |           |      |           |      |           |     |                            |  |           |      |           |      |           |     |                                   |  |           |      |           |      |           |     |                        |  |           |      |           |      |                                                                                                                                                                                                                                                                                                                                                                                                                                                                                                                                                                                                                          |
| Paired t-test or McNemar's test               |                                                                                                                                                                                                                          |                                                                                                                                                                                                                                                                                                                                                                                                                                                                               |                                                                                                                                                                                                                                                                                                                                                                                                                                                                                                                                                                                                                                                            |                                                                                                                                               |                                                                                                                                                                                                                                                                                                                                                                                                                                                                                                                                                                                                                                                                                                                                                                                                                                                                                                                                                                                                                                                                                                                                                                                                                                                                               |                 |                 |         |                                                                                                                                                                                                                         |                |                                  |  |           |      |           |      |           |      |                                   |  |           |      |           |      |           |      |                            |  |           |      |           |      |           |     |                            |  |           |      |           |      |           |     |                                   |  |           |      |           |      |           |     |                        |  |           |      |           |      |                                                                                                                                                                                                                                                                                                                                                                                                                                                                                                                                                                                                                          |
| CHILDREN AND ADOLESCENTS                      |                                                                                                                                                                                                                          |                                                                                                                                                                                                                                                                                                                                                                                                                                                                               |                                                                                                                                                                                                                                                                                                                                                                                                                                                                                                                                                                                                                                                            |                                                                                                                                               |                                                                                                                                                                                                                                                                                                                                                                                                                                                                                                                                                                                                                                                                                                                                                                                                                                                                                                                                                                                                                                                                                                                                                                                                                                                                               |                 |                 |         |                                                                                                                                                                                                                         |                |                                  |  |           |      |           |      |           |      |                                   |  |           |      |           |      |           |      |                            |  |           |      |           |      |           |     |                            |  |           |      |           |      |           |     |                                   |  |           |      |           |      |           |     |                        |  |           |      |           |      |                                                                                                                                                                                                                                                                                                                                                                                                                                                                                                                                                                                                                          |
| McCormack et al., 2020                        | <b>Study design:</b> Cross-sectional study<br><b>Study name:</b> n.a.<br><b>Country of study:</b> Canada<br><b>Time of study:</b> April 14–May 27, 2020<br><b>No. of waves:</b> n = 1<br><b>Follow-up duration:</b> n.r. | <b>Description:</b> Children aged 5–17 years<br><b>Inclusion criteria:</b> n.r.<br><b># invited:</b> n = 25,000<br><b># baseline:</b> n = 1,124 (adults)<br>n = 345 (parents with at least one school-aged child)<br>n = 328 (children)<br><b># follow-up:</b> n.a.<br><b>Age at baseline:</b> 5–11 years: 80.5 %, 12–17 years: 19.5 %<br><b>% females:</b> 45.1 %<br><b>Response:</b> 4.5 % (adults)<br>1.3 % (parents with complete data)<br><b>Lost to follow-up:</b> n.a. | <b>COVID-19 public health emergency response:</b><br>- forced closures of educational and day-care facilities, non-essential businesses, and private and public recreation facilities (e.g., playgrounds, outdoor exercise equipment, and sports courts and fields)<br>- individuals and families were advised to take personal steps to reduce virus transmission including practicing physical distancing (i.e., avoiding crowded places, avoiding common greetings, limiting contact with High risk individuals, and maintaining a distance of 2-metres from others), forgoing international travel, and self-quarantining if they experienced symptoms | <b>(Change in) physical activity:</b><br>Parents-reported questions<br><b>(Change in) sedentary behaviours:</b><br>Parents-reported questions | <b>Table 2: Descriptive statistics for the change physical activity and sedentary behaviors since COVID-19 public health emergency response</b> <table><tr><td></td><td>Prevalence (%)</td></tr><tr><td colspan="2"><b>Physically active in home</b></td></tr><tr><td>Increased</td><td>48.8</td></tr><tr><td>No change</td><td>32.9</td></tr><tr><td>Decreased</td><td>18.3</td></tr><tr><td colspan="2"><b>Physically active outdoors</b></td></tr><tr><td>Increased</td><td>38.7</td></tr><tr><td>No change</td><td>22.3</td></tr><tr><td>Decreased</td><td>39.0</td></tr><tr><td colspan="2"><b>Watching television</b></td></tr><tr><td>Increased</td><td>58.8</td></tr><tr><td>No change</td><td>38.4</td></tr><tr><td>Decreased</td><td>2.7</td></tr><tr><td colspan="2"><b>Playing video games</b></td></tr><tr><td>Increased</td><td>56.4</td></tr><tr><td>No change</td><td>40.9</td></tr><tr><td>Decreased</td><td>2.7</td></tr><tr><td colspan="2"><b>Using screen-based devices</b></td></tr><tr><td>Increased</td><td>75.9</td></tr><tr><td>No change</td><td>22.0</td></tr><tr><td>Decreased</td><td>2.1</td></tr><tr><td colspan="2"><b>Playing at park</b></td></tr><tr><td>Increased</td><td>15.5</td></tr><tr><td>No change</td><td>31.7</td></tr></table> |                 |                 |         |                                                                                                                                                                                                                         | Prevalence (%) | <b>Physically active in home</b> |  | Increased | 48.8 | No change | 32.9 | Decreased | 18.3 | <b>Physically active outdoors</b> |  | Increased | 38.7 | No change | 22.3 | Decreased | 39.0 | <b>Watching television</b> |  | Increased | 58.8 | No change | 38.4 | Decreased | 2.7 | <b>Playing video games</b> |  | Increased | 56.4 | No change | 40.9 | Decreased | 2.7 | <b>Using screen-based devices</b> |  | Increased | 75.9 | No change | 22.0 | Decreased | 2.1 | <b>Playing at park</b> |  | Increased | 15.5 | No change | 31.7 | <b>Overall study quality:</b><br>High risk<br><b>Conflict of interest</b><br>Stated (none declared)<br><b>Funding:</b><br>Public and non-profit funds<br><br>+ ethical approval from the University of Calgary Conjoint Human Research Ethics Board<br>+ simple random sample of 25,000 households with equal chance of selection across 14 adjacent communities, one adult per household<br>+ consideration of the confounder "age" (homogeneous group)<br><br>- low response<br>- parental-reported questions<br>- descriptive analysis only<br>- no consideration of the confounder "sex" in the statistical analysis |
|                                               | Prevalence (%)                                                                                                                                                                                                           |                                                                                                                                                                                                                                                                                                                                                                                                                                                                               |                                                                                                                                                                                                                                                                                                                                                                                                                                                                                                                                                                                                                                                            |                                                                                                                                               |                                                                                                                                                                                                                                                                                                                                                                                                                                                                                                                                                                                                                                                                                                                                                                                                                                                                                                                                                                                                                                                                                                                                                                                                                                                                               |                 |                 |         |                                                                                                                                                                                                                         |                |                                  |  |           |      |           |      |           |      |                                   |  |           |      |           |      |           |      |                            |  |           |      |           |      |           |     |                            |  |           |      |           |      |           |     |                                   |  |           |      |           |      |           |     |                        |  |           |      |           |      |                                                                                                                                                                                                                                                                                                                                                                                                                                                                                                                                                                                                                          |
| <b>Physically active in home</b>              |                                                                                                                                                                                                                          |                                                                                                                                                                                                                                                                                                                                                                                                                                                                               |                                                                                                                                                                                                                                                                                                                                                                                                                                                                                                                                                                                                                                                            |                                                                                                                                               |                                                                                                                                                                                                                                                                                                                                                                                                                                                                                                                                                                                                                                                                                                                                                                                                                                                                                                                                                                                                                                                                                                                                                                                                                                                                               |                 |                 |         |                                                                                                                                                                                                                         |                |                                  |  |           |      |           |      |           |      |                                   |  |           |      |           |      |           |      |                            |  |           |      |           |      |           |     |                            |  |           |      |           |      |           |     |                                   |  |           |      |           |      |           |     |                        |  |           |      |           |      |                                                                                                                                                                                                                                                                                                                                                                                                                                                                                                                                                                                                                          |
| Increased                                     | 48.8                                                                                                                                                                                                                     |                                                                                                                                                                                                                                                                                                                                                                                                                                                                               |                                                                                                                                                                                                                                                                                                                                                                                                                                                                                                                                                                                                                                                            |                                                                                                                                               |                                                                                                                                                                                                                                                                                                                                                                                                                                                                                                                                                                                                                                                                                                                                                                                                                                                                                                                                                                                                                                                                                                                                                                                                                                                                               |                 |                 |         |                                                                                                                                                                                                                         |                |                                  |  |           |      |           |      |           |      |                                   |  |           |      |           |      |           |      |                            |  |           |      |           |      |           |     |                            |  |           |      |           |      |           |     |                                   |  |           |      |           |      |           |     |                        |  |           |      |           |      |                                                                                                                                                                                                                                                                                                                                                                                                                                                                                                                                                                                                                          |
| No change                                     | 32.9                                                                                                                                                                                                                     |                                                                                                                                                                                                                                                                                                                                                                                                                                                                               |                                                                                                                                                                                                                                                                                                                                                                                                                                                                                                                                                                                                                                                            |                                                                                                                                               |                                                                                                                                                                                                                                                                                                                                                                                                                                                                                                                                                                                                                                                                                                                                                                                                                                                                                                                                                                                                                                                                                                                                                                                                                                                                               |                 |                 |         |                                                                                                                                                                                                                         |                |                                  |  |           |      |           |      |           |      |                                   |  |           |      |           |      |           |      |                            |  |           |      |           |      |           |     |                            |  |           |      |           |      |           |     |                                   |  |           |      |           |      |           |     |                        |  |           |      |           |      |                                                                                                                                                                                                                                                                                                                                                                                                                                                                                                                                                                                                                          |
| Decreased                                     | 18.3                                                                                                                                                                                                                     |                                                                                                                                                                                                                                                                                                                                                                                                                                                                               |                                                                                                                                                                                                                                                                                                                                                                                                                                                                                                                                                                                                                                                            |                                                                                                                                               |                                                                                                                                                                                                                                                                                                                                                                                                                                                                                                                                                                                                                                                                                                                                                                                                                                                                                                                                                                                                                                                                                                                                                                                                                                                                               |                 |                 |         |                                                                                                                                                                                                                         |                |                                  |  |           |      |           |      |           |      |                                   |  |           |      |           |      |           |      |                            |  |           |      |           |      |           |     |                            |  |           |      |           |      |           |     |                                   |  |           |      |           |      |           |     |                        |  |           |      |           |      |                                                                                                                                                                                                                                                                                                                                                                                                                                                                                                                                                                                                                          |
| <b>Physically active outdoors</b>             |                                                                                                                                                                                                                          |                                                                                                                                                                                                                                                                                                                                                                                                                                                                               |                                                                                                                                                                                                                                                                                                                                                                                                                                                                                                                                                                                                                                                            |                                                                                                                                               |                                                                                                                                                                                                                                                                                                                                                                                                                                                                                                                                                                                                                                                                                                                                                                                                                                                                                                                                                                                                                                                                                                                                                                                                                                                                               |                 |                 |         |                                                                                                                                                                                                                         |                |                                  |  |           |      |           |      |           |      |                                   |  |           |      |           |      |           |      |                            |  |           |      |           |      |           |     |                            |  |           |      |           |      |           |     |                                   |  |           |      |           |      |           |     |                        |  |           |      |           |      |                                                                                                                                                                                                                                                                                                                                                                                                                                                                                                                                                                                                                          |
| Increased                                     | 38.7                                                                                                                                                                                                                     |                                                                                                                                                                                                                                                                                                                                                                                                                                                                               |                                                                                                                                                                                                                                                                                                                                                                                                                                                                                                                                                                                                                                                            |                                                                                                                                               |                                                                                                                                                                                                                                                                                                                                                                                                                                                                                                                                                                                                                                                                                                                                                                                                                                                                                                                                                                                                                                                                                                                                                                                                                                                                               |                 |                 |         |                                                                                                                                                                                                                         |                |                                  |  |           |      |           |      |           |      |                                   |  |           |      |           |      |           |      |                            |  |           |      |           |      |           |     |                            |  |           |      |           |      |           |     |                                   |  |           |      |           |      |           |     |                        |  |           |      |           |      |                                                                                                                                                                                                                                                                                                                                                                                                                                                                                                                                                                                                                          |
| No change                                     | 22.3                                                                                                                                                                                                                     |                                                                                                                                                                                                                                                                                                                                                                                                                                                                               |                                                                                                                                                                                                                                                                                                                                                                                                                                                                                                                                                                                                                                                            |                                                                                                                                               |                                                                                                                                                                                                                                                                                                                                                                                                                                                                                                                                                                                                                                                                                                                                                                                                                                                                                                                                                                                                                                                                                                                                                                                                                                                                               |                 |                 |         |                                                                                                                                                                                                                         |                |                                  |  |           |      |           |      |           |      |                                   |  |           |      |           |      |           |      |                            |  |           |      |           |      |           |     |                            |  |           |      |           |      |           |     |                                   |  |           |      |           |      |           |     |                        |  |           |      |           |      |                                                                                                                                                                                                                                                                                                                                                                                                                                                                                                                                                                                                                          |
| Decreased                                     | 39.0                                                                                                                                                                                                                     |                                                                                                                                                                                                                                                                                                                                                                                                                                                                               |                                                                                                                                                                                                                                                                                                                                                                                                                                                                                                                                                                                                                                                            |                                                                                                                                               |                                                                                                                                                                                                                                                                                                                                                                                                                                                                                                                                                                                                                                                                                                                                                                                                                                                                                                                                                                                                                                                                                                                                                                                                                                                                               |                 |                 |         |                                                                                                                                                                                                                         |                |                                  |  |           |      |           |      |           |      |                                   |  |           |      |           |      |           |      |                            |  |           |      |           |      |           |     |                            |  |           |      |           |      |           |     |                                   |  |           |      |           |      |           |     |                        |  |           |      |           |      |                                                                                                                                                                                                                                                                                                                                                                                                                                                                                                                                                                                                                          |
| <b>Watching television</b>                    |                                                                                                                                                                                                                          |                                                                                                                                                                                                                                                                                                                                                                                                                                                                               |                                                                                                                                                                                                                                                                                                                                                                                                                                                                                                                                                                                                                                                            |                                                                                                                                               |                                                                                                                                                                                                                                                                                                                                                                                                                                                                                                                                                                                                                                                                                                                                                                                                                                                                                                                                                                                                                                                                                                                                                                                                                                                                               |                 |                 |         |                                                                                                                                                                                                                         |                |                                  |  |           |      |           |      |           |      |                                   |  |           |      |           |      |           |      |                            |  |           |      |           |      |           |     |                            |  |           |      |           |      |           |     |                                   |  |           |      |           |      |           |     |                        |  |           |      |           |      |                                                                                                                                                                                                                                                                                                                                                                                                                                                                                                                                                                                                                          |
| Increased                                     | 58.8                                                                                                                                                                                                                     |                                                                                                                                                                                                                                                                                                                                                                                                                                                                               |                                                                                                                                                                                                                                                                                                                                                                                                                                                                                                                                                                                                                                                            |                                                                                                                                               |                                                                                                                                                                                                                                                                                                                                                                                                                                                                                                                                                                                                                                                                                                                                                                                                                                                                                                                                                                                                                                                                                                                                                                                                                                                                               |                 |                 |         |                                                                                                                                                                                                                         |                |                                  |  |           |      |           |      |           |      |                                   |  |           |      |           |      |           |      |                            |  |           |      |           |      |           |     |                            |  |           |      |           |      |           |     |                                   |  |           |      |           |      |           |     |                        |  |           |      |           |      |                                                                                                                                                                                                                                                                                                                                                                                                                                                                                                                                                                                                                          |
| No change                                     | 38.4                                                                                                                                                                                                                     |                                                                                                                                                                                                                                                                                                                                                                                                                                                                               |                                                                                                                                                                                                                                                                                                                                                                                                                                                                                                                                                                                                                                                            |                                                                                                                                               |                                                                                                                                                                                                                                                                                                                                                                                                                                                                                                                                                                                                                                                                                                                                                                                                                                                                                                                                                                                                                                                                                                                                                                                                                                                                               |                 |                 |         |                                                                                                                                                                                                                         |                |                                  |  |           |      |           |      |           |      |                                   |  |           |      |           |      |           |      |                            |  |           |      |           |      |           |     |                            |  |           |      |           |      |           |     |                                   |  |           |      |           |      |           |     |                        |  |           |      |           |      |                                                                                                                                                                                                                                                                                                                                                                                                                                                                                                                                                                                                                          |
| Decreased                                     | 2.7                                                                                                                                                                                                                      |                                                                                                                                                                                                                                                                                                                                                                                                                                                                               |                                                                                                                                                                                                                                                                                                                                                                                                                                                                                                                                                                                                                                                            |                                                                                                                                               |                                                                                                                                                                                                                                                                                                                                                                                                                                                                                                                                                                                                                                                                                                                                                                                                                                                                                                                                                                                                                                                                                                                                                                                                                                                                               |                 |                 |         |                                                                                                                                                                                                                         |                |                                  |  |           |      |           |      |           |      |                                   |  |           |      |           |      |           |      |                            |  |           |      |           |      |           |     |                            |  |           |      |           |      |           |     |                                   |  |           |      |           |      |           |     |                        |  |           |      |           |      |                                                                                                                                                                                                                                                                                                                                                                                                                                                                                                                                                                                                                          |
| <b>Playing video games</b>                    |                                                                                                                                                                                                                          |                                                                                                                                                                                                                                                                                                                                                                                                                                                                               |                                                                                                                                                                                                                                                                                                                                                                                                                                                                                                                                                                                                                                                            |                                                                                                                                               |                                                                                                                                                                                                                                                                                                                                                                                                                                                                                                                                                                                                                                                                                                                                                                                                                                                                                                                                                                                                                                                                                                                                                                                                                                                                               |                 |                 |         |                                                                                                                                                                                                                         |                |                                  |  |           |      |           |      |           |      |                                   |  |           |      |           |      |           |      |                            |  |           |      |           |      |           |     |                            |  |           |      |           |      |           |     |                                   |  |           |      |           |      |           |     |                        |  |           |      |           |      |                                                                                                                                                                                                                                                                                                                                                                                                                                                                                                                                                                                                                          |
| Increased                                     | 56.4                                                                                                                                                                                                                     |                                                                                                                                                                                                                                                                                                                                                                                                                                                                               |                                                                                                                                                                                                                                                                                                                                                                                                                                                                                                                                                                                                                                                            |                                                                                                                                               |                                                                                                                                                                                                                                                                                                                                                                                                                                                                                                                                                                                                                                                                                                                                                                                                                                                                                                                                                                                                                                                                                                                                                                                                                                                                               |                 |                 |         |                                                                                                                                                                                                                         |                |                                  |  |           |      |           |      |           |      |                                   |  |           |      |           |      |           |      |                            |  |           |      |           |      |           |     |                            |  |           |      |           |      |           |     |                                   |  |           |      |           |      |           |     |                        |  |           |      |           |      |                                                                                                                                                                                                                                                                                                                                                                                                                                                                                                                                                                                                                          |
| No change                                     | 40.9                                                                                                                                                                                                                     |                                                                                                                                                                                                                                                                                                                                                                                                                                                                               |                                                                                                                                                                                                                                                                                                                                                                                                                                                                                                                                                                                                                                                            |                                                                                                                                               |                                                                                                                                                                                                                                                                                                                                                                                                                                                                                                                                                                                                                                                                                                                                                                                                                                                                                                                                                                                                                                                                                                                                                                                                                                                                               |                 |                 |         |                                                                                                                                                                                                                         |                |                                  |  |           |      |           |      |           |      |                                   |  |           |      |           |      |           |      |                            |  |           |      |           |      |           |     |                            |  |           |      |           |      |           |     |                                   |  |           |      |           |      |           |     |                        |  |           |      |           |      |                                                                                                                                                                                                                                                                                                                                                                                                                                                                                                                                                                                                                          |
| Decreased                                     | 2.7                                                                                                                                                                                                                      |                                                                                                                                                                                                                                                                                                                                                                                                                                                                               |                                                                                                                                                                                                                                                                                                                                                                                                                                                                                                                                                                                                                                                            |                                                                                                                                               |                                                                                                                                                                                                                                                                                                                                                                                                                                                                                                                                                                                                                                                                                                                                                                                                                                                                                                                                                                                                                                                                                                                                                                                                                                                                               |                 |                 |         |                                                                                                                                                                                                                         |                |                                  |  |           |      |           |      |           |      |                                   |  |           |      |           |      |           |      |                            |  |           |      |           |      |           |     |                            |  |           |      |           |      |           |     |                                   |  |           |      |           |      |           |     |                        |  |           |      |           |      |                                                                                                                                                                                                                                                                                                                                                                                                                                                                                                                                                                                                                          |
| <b>Using screen-based devices</b>             |                                                                                                                                                                                                                          |                                                                                                                                                                                                                                                                                                                                                                                                                                                                               |                                                                                                                                                                                                                                                                                                                                                                                                                                                                                                                                                                                                                                                            |                                                                                                                                               |                                                                                                                                                                                                                                                                                                                                                                                                                                                                                                                                                                                                                                                                                                                                                                                                                                                                                                                                                                                                                                                                                                                                                                                                                                                                               |                 |                 |         |                                                                                                                                                                                                                         |                |                                  |  |           |      |           |      |           |      |                                   |  |           |      |           |      |           |      |                            |  |           |      |           |      |           |     |                            |  |           |      |           |      |           |     |                                   |  |           |      |           |      |           |     |                        |  |           |      |           |      |                                                                                                                                                                                                                                                                                                                                                                                                                                                                                                                                                                                                                          |
| Increased                                     | 75.9                                                                                                                                                                                                                     |                                                                                                                                                                                                                                                                                                                                                                                                                                                                               |                                                                                                                                                                                                                                                                                                                                                                                                                                                                                                                                                                                                                                                            |                                                                                                                                               |                                                                                                                                                                                                                                                                                                                                                                                                                                                                                                                                                                                                                                                                                                                                                                                                                                                                                                                                                                                                                                                                                                                                                                                                                                                                               |                 |                 |         |                                                                                                                                                                                                                         |                |                                  |  |           |      |           |      |           |      |                                   |  |           |      |           |      |           |      |                            |  |           |      |           |      |           |     |                            |  |           |      |           |      |           |     |                                   |  |           |      |           |      |           |     |                        |  |           |      |           |      |                                                                                                                                                                                                                                                                                                                                                                                                                                                                                                                                                                                                                          |
| No change                                     | 22.0                                                                                                                                                                                                                     |                                                                                                                                                                                                                                                                                                                                                                                                                                                                               |                                                                                                                                                                                                                                                                                                                                                                                                                                                                                                                                                                                                                                                            |                                                                                                                                               |                                                                                                                                                                                                                                                                                                                                                                                                                                                                                                                                                                                                                                                                                                                                                                                                                                                                                                                                                                                                                                                                                                                                                                                                                                                                               |                 |                 |         |                                                                                                                                                                                                                         |                |                                  |  |           |      |           |      |           |      |                                   |  |           |      |           |      |           |      |                            |  |           |      |           |      |           |     |                            |  |           |      |           |      |           |     |                                   |  |           |      |           |      |           |     |                        |  |           |      |           |      |                                                                                                                                                                                                                                                                                                                                                                                                                                                                                                                                                                                                                          |
| Decreased                                     | 2.1                                                                                                                                                                                                                      |                                                                                                                                                                                                                                                                                                                                                                                                                                                                               |                                                                                                                                                                                                                                                                                                                                                                                                                                                                                                                                                                                                                                                            |                                                                                                                                               |                                                                                                                                                                                                                                                                                                                                                                                                                                                                                                                                                                                                                                                                                                                                                                                                                                                                                                                                                                                                                                                                                                                                                                                                                                                                               |                 |                 |         |                                                                                                                                                                                                                         |                |                                  |  |           |      |           |      |           |      |                                   |  |           |      |           |      |           |      |                            |  |           |      |           |      |           |     |                            |  |           |      |           |      |           |     |                                   |  |           |      |           |      |           |     |                        |  |           |      |           |      |                                                                                                                                                                                                                                                                                                                                                                                                                                                                                                                                                                                                                          |
| <b>Playing at park</b>                        |                                                                                                                                                                                                                          |                                                                                                                                                                                                                                                                                                                                                                                                                                                                               |                                                                                                                                                                                                                                                                                                                                                                                                                                                                                                                                                                                                                                                            |                                                                                                                                               |                                                                                                                                                                                                                                                                                                                                                                                                                                                                                                                                                                                                                                                                                                                                                                                                                                                                                                                                                                                                                                                                                                                                                                                                                                                                               |                 |                 |         |                                                                                                                                                                                                                         |                |                                  |  |           |      |           |      |           |      |                                   |  |           |      |           |      |           |      |                            |  |           |      |           |      |           |     |                            |  |           |      |           |      |           |     |                                   |  |           |      |           |      |           |     |                        |  |           |      |           |      |                                                                                                                                                                                                                                                                                                                                                                                                                                                                                                                                                                                                                          |
| Increased                                     | 15.5                                                                                                                                                                                                                     |                                                                                                                                                                                                                                                                                                                                                                                                                                                                               |                                                                                                                                                                                                                                                                                                                                                                                                                                                                                                                                                                                                                                                            |                                                                                                                                               |                                                                                                                                                                                                                                                                                                                                                                                                                                                                                                                                                                                                                                                                                                                                                                                                                                                                                                                                                                                                                                                                                                                                                                                                                                                                               |                 |                 |         |                                                                                                                                                                                                                         |                |                                  |  |           |      |           |      |           |      |                                   |  |           |      |           |      |           |      |                            |  |           |      |           |      |           |     |                            |  |           |      |           |      |           |     |                                   |  |           |      |           |      |           |     |                        |  |           |      |           |      |                                                                                                                                                                                                                                                                                                                                                                                                                                                                                                                                                                                                                          |
| No change                                     | 31.7                                                                                                                                                                                                                     |                                                                                                                                                                                                                                                                                                                                                                                                                                                                               |                                                                                                                                                                                                                                                                                                                                                                                                                                                                                                                                                                                                                                                            |                                                                                                                                               |                                                                                                                                                                                                                                                                                                                                                                                                                                                                                                                                                                                                                                                                                                                                                                                                                                                                                                                                                                                                                                                                                                                                                                                                                                                                               |                 |                 |         |                                                                                                                                                                                                                         |                |                                  |  |           |      |           |      |           |      |                                   |  |           |      |           |      |           |      |                            |  |           |      |           |      |           |     |                            |  |           |      |           |      |           |     |                                   |  |           |      |           |      |           |     |                        |  |           |      |           |      |                                                                                                                                                                                                                                                                                                                                                                                                                                                                                                                                                                                                                          |

| Reference<br>(First author, publication year) | General<br>(Study design<br>Study name<br>Country of study<br>Time of study<br>No. of waves<br>Follow-up duration<br>(e.g., mean, range))                                                                                                                        | Population<br>(Description<br>Inclusion criteria<br># invited<br># baseline<br># follow-up<br>Age at baseline<br>% females<br>Response<br>Lost to follow-up)                                                                                                                                                                                                                                         | Exposure<br>(Description & assessment)                                                                                                                                                                                                                           | Outcome<br>(Description & assessment)                                                                                                                                                                                                                                                                                                  | Results<br>(Description of all topically relevant results)                                                                                                                                                                                                                                                                                                                                                                                                                                                                                                                                                                                                                                                                                                                                                                                                                                                                                                                                                                                                                                                                                                                                                                                                           | Comments<br>(study quality [overall assessment according to Iijaz/Shamliyan/SIGN/CASP]<br>Conflict of interest [stated vs. not stated]<br>Funding (public, non-profit, commercial)<br>Strengths (+) and weaknesses (-)) |               |                                |   |                   |     |           |      |                                 |          |                                                             |         |             |  |  |  |                         |           |           |         |                             |         |           |       |                                    |         |         |       |                                            |         |         |       |                                        |         |           |       |                                          |           |           |         |                                 |  |  |  |              |           |           |       |                                   |           |           |       |                                                                                                                                                                                                                                                                                                                                                                                                                                                                                                                                                                                                                                                                                                                                                                                                                                               |
|-----------------------------------------------|------------------------------------------------------------------------------------------------------------------------------------------------------------------------------------------------------------------------------------------------------------------|------------------------------------------------------------------------------------------------------------------------------------------------------------------------------------------------------------------------------------------------------------------------------------------------------------------------------------------------------------------------------------------------------|------------------------------------------------------------------------------------------------------------------------------------------------------------------------------------------------------------------------------------------------------------------|----------------------------------------------------------------------------------------------------------------------------------------------------------------------------------------------------------------------------------------------------------------------------------------------------------------------------------------|----------------------------------------------------------------------------------------------------------------------------------------------------------------------------------------------------------------------------------------------------------------------------------------------------------------------------------------------------------------------------------------------------------------------------------------------------------------------------------------------------------------------------------------------------------------------------------------------------------------------------------------------------------------------------------------------------------------------------------------------------------------------------------------------------------------------------------------------------------------------------------------------------------------------------------------------------------------------------------------------------------------------------------------------------------------------------------------------------------------------------------------------------------------------------------------------------------------------------------------------------------------------|-------------------------------------------------------------------------------------------------------------------------------------------------------------------------------------------------------------------------|---------------|--------------------------------|---|-------------------|-----|-----------|------|---------------------------------|----------|-------------------------------------------------------------|---------|-------------|--|--|--|-------------------------|-----------|-----------|---------|-----------------------------|---------|-----------|-------|------------------------------------|---------|---------|-------|--------------------------------------------|---------|---------|-------|----------------------------------------|---------|-----------|-------|------------------------------------------|-----------|-----------|---------|---------------------------------|--|--|--|--------------|-----------|-----------|-------|-----------------------------------|-----------|-----------|-------|-----------------------------------------------------------------------------------------------------------------------------------------------------------------------------------------------------------------------------------------------------------------------------------------------------------------------------------------------------------------------------------------------------------------------------------------------------------------------------------------------------------------------------------------------------------------------------------------------------------------------------------------------------------------------------------------------------------------------------------------------------------------------------------------------------------------------------------------------|
|                                               |                                                                                                                                                                                                                                                                  |                                                                                                                                                                                                                                                                                                                                                                                                      |                                                                                                                                                                                                                                                                  |                                                                                                                                                                                                                                                                                                                                        | <table><tr><td>Decreased</td><td>52.7</td></tr><tr><td colspan="2">Playing at other public places</td></tr><tr><td>Increased</td><td>9.5</td></tr><tr><td>No change</td><td>36.9</td></tr><tr><td>Decreased</td><td>53.7</td></tr></table>                                                                                                                                                                                                                                                                                                                                                                                                                                                                                                                                                                                                                                                                                                                                                                                                                                                                                                                                                                                                                           | Decreased                                                                                                                                                                                                               | 52.7          | Playing at other public places |   | Increased         | 9.5 | No change | 36.9 | Decreased                       | 53.7     | - due to study design no actual chronological investigation |         |             |  |  |  |                         |           |           |         |                             |         |           |       |                                    |         |         |       |                                            |         |         |       |                                        |         |           |       |                                          |           |           |         |                                 |  |  |  |              |           |           |       |                                   |           |           |       |                                                                                                                                                                                                                                                                                                                                                                                                                                                                                                                                                                                                                                                                                                                                                                                                                                               |
| Decreased                                     | 52.7                                                                                                                                                                                                                                                             |                                                                                                                                                                                                                                                                                                                                                                                                      |                                                                                                                                                                                                                                                                  |                                                                                                                                                                                                                                                                                                                                        |                                                                                                                                                                                                                                                                                                                                                                                                                                                                                                                                                                                                                                                                                                                                                                                                                                                                                                                                                                                                                                                                                                                                                                                                                                                                      |                                                                                                                                                                                                                         |               |                                |   |                   |     |           |      |                                 |          |                                                             |         |             |  |  |  |                         |           |           |         |                             |         |           |       |                                    |         |         |       |                                            |         |         |       |                                        |         |           |       |                                          |           |           |         |                                 |  |  |  |              |           |           |       |                                   |           |           |       |                                                                                                                                                                                                                                                                                                                                                                                                                                                                                                                                                                                                                                                                                                                                                                                                                                               |
| Playing at other public places                |                                                                                                                                                                                                                                                                  |                                                                                                                                                                                                                                                                                                                                                                                                      |                                                                                                                                                                                                                                                                  |                                                                                                                                                                                                                                                                                                                                        |                                                                                                                                                                                                                                                                                                                                                                                                                                                                                                                                                                                                                                                                                                                                                                                                                                                                                                                                                                                                                                                                                                                                                                                                                                                                      |                                                                                                                                                                                                                         |               |                                |   |                   |     |           |      |                                 |          |                                                             |         |             |  |  |  |                         |           |           |         |                             |         |           |       |                                    |         |         |       |                                            |         |         |       |                                        |         |           |       |                                          |           |           |         |                                 |  |  |  |              |           |           |       |                                   |           |           |       |                                                                                                                                                                                                                                                                                                                                                                                                                                                                                                                                                                                                                                                                                                                                                                                                                                               |
| Increased                                     | 9.5                                                                                                                                                                                                                                                              |                                                                                                                                                                                                                                                                                                                                                                                                      |                                                                                                                                                                                                                                                                  |                                                                                                                                                                                                                                                                                                                                        |                                                                                                                                                                                                                                                                                                                                                                                                                                                                                                                                                                                                                                                                                                                                                                                                                                                                                                                                                                                                                                                                                                                                                                                                                                                                      |                                                                                                                                                                                                                         |               |                                |   |                   |     |           |      |                                 |          |                                                             |         |             |  |  |  |                         |           |           |         |                             |         |           |       |                                    |         |         |       |                                            |         |         |       |                                        |         |           |       |                                          |           |           |         |                                 |  |  |  |              |           |           |       |                                   |           |           |       |                                                                                                                                                                                                                                                                                                                                                                                                                                                                                                                                                                                                                                                                                                                                                                                                                                               |
| No change                                     | 36.9                                                                                                                                                                                                                                                             |                                                                                                                                                                                                                                                                                                                                                                                                      |                                                                                                                                                                                                                                                                  |                                                                                                                                                                                                                                                                                                                                        |                                                                                                                                                                                                                                                                                                                                                                                                                                                                                                                                                                                                                                                                                                                                                                                                                                                                                                                                                                                                                                                                                                                                                                                                                                                                      |                                                                                                                                                                                                                         |               |                                |   |                   |     |           |      |                                 |          |                                                             |         |             |  |  |  |                         |           |           |         |                             |         |           |       |                                    |         |         |       |                                            |         |         |       |                                        |         |           |       |                                          |           |           |         |                                 |  |  |  |              |           |           |       |                                   |           |           |       |                                                                                                                                                                                                                                                                                                                                                                                                                                                                                                                                                                                                                                                                                                                                                                                                                                               |
| Decreased                                     | 53.7                                                                                                                                                                                                                                                             |                                                                                                                                                                                                                                                                                                                                                                                                      |                                                                                                                                                                                                                                                                  |                                                                                                                                                                                                                                                                                                                                        |                                                                                                                                                                                                                                                                                                                                                                                                                                                                                                                                                                                                                                                                                                                                                                                                                                                                                                                                                                                                                                                                                                                                                                                                                                                                      |                                                                                                                                                                                                                         |               |                                |   |                   |     |           |      |                                 |          |                                                             |         |             |  |  |  |                         |           |           |         |                             |         |           |       |                                    |         |         |       |                                            |         |         |       |                                        |         |           |       |                                          |           |           |         |                                 |  |  |  |              |           |           |       |                                   |           |           |       |                                                                                                                                                                                                                                                                                                                                                                                                                                                                                                                                                                                                                                                                                                                                                                                                                                               |
| Medrano et al., 2020                          | <b>Study design:</b> Cohort study<br><b>Study name:</b> MUGI project<br><b>Country of study:</b> Spain<br><b>Time of study:</b> T1: September–December 2019<br>T2: March–April 2020<br><b>No. of waves:</b> n = 2<br><b>Follow-up duration:</b> Around 4–8 month | <b>Description:</b> School children (pupils), aged 8–16 years<br><b>Inclusion criteria:</b> Exclusion of pupils with an intellectual or a physical disability<br><b># invited:</b> n = 348<br><b># baseline:</b> n = 291<br><b># follow-up:</b> n = 113<br><b>Age at baseline:</b> M: 12.1 years (SD: 2.4)<br><b>% females:</b> 47.8 %<br><b>Response:</b> 83.6%<br><b>Lost to follow-up:</b> 61.2 % | <b>Home confinement during the COVID-19 pandemic:</b><br>- closing schools and establishing mandatory home confinement for children (6 weeks of total locked down, where children were not allowed to leave their house at all, from March 14 to April 26, 2020) | <b>Physical activity:</b> “The Youth Activity Profile” questionnaire (YAP), measured in minutes/day<br><b>Screen time:</b> “The Youth Activity Profile” questionnaire (YAP)<br><b>Adherence to Mediterranean diet:</b> Mediterranean Diet Quality Index for children and teenagers (KIDMED) questionnaire (low adherence: score <8/12) | <b>Table 2: Changes in lifestyle habits before and during the COVID-19 confinement</b> <table><tr><td></td><td>T1<br/>(M SD))</td><td>T2<br/>(M SD))</td><td>p</td></tr><tr><td colspan="4">Physical activity</td></tr><tr><td>Physical activity (minutes/day)</td><td>154 (40)</td><td>63 (39)</td><td>&lt; 0.001</td></tr><tr><td colspan="4">Screen time</td></tr><tr><td>Screen time (hours/day)</td><td>4.3 (2.4)</td><td>6.1 (2.4)</td><td>&lt; 0.001</td></tr><tr><td>TV time ≥2 hours/day (N, %)</td><td>3 (2.8)</td><td>14 (13.2)</td><td>0.005</td></tr><tr><td>Videogame time ≥2 hours/day (N, %)</td><td>6 (5.7)</td><td>7 (6.6)</td><td>0.775</td></tr><tr><td>Computer (no homework) ≥2 hours/day (N, %)</td><td>1 (0.9)</td><td>0 (0.0)</td><td>0.316</td></tr><tr><td>Total mobile-phone ≥2 hours/day (N, %)</td><td>4 (3.8)</td><td>20 (18.9)</td><td>0.001</td></tr><tr><td>Total screen time ≥2 ≥2 hours/day (N, %)</td><td>70 (66.0)</td><td>93 (87.7)</td><td>&lt; 0.001</td></tr><tr><td colspan="4">Adherence to Mediterranean diet</td></tr><tr><td>KIDMED score</td><td>5.9 (1.8)</td><td>6.4 (1.5)</td><td>0.018</td></tr><tr><td>Low adherence (KIDMED score: &lt; 8)</td><td>86 (81.1)</td><td>81 (76.4)</td><td>0.476</td></tr></table> |                                                                                                                                                                                                                         | T1<br>(M SD)) | T2<br>(M SD))                  | p | Physical activity |     |           |      | Physical activity (minutes/day) | 154 (40) | 63 (39)                                                     | < 0.001 | Screen time |  |  |  | Screen time (hours/day) | 4.3 (2.4) | 6.1 (2.4) | < 0.001 | TV time ≥2 hours/day (N, %) | 3 (2.8) | 14 (13.2) | 0.005 | Videogame time ≥2 hours/day (N, %) | 6 (5.7) | 7 (6.6) | 0.775 | Computer (no homework) ≥2 hours/day (N, %) | 1 (0.9) | 0 (0.0) | 0.316 | Total mobile-phone ≥2 hours/day (N, %) | 4 (3.8) | 20 (18.9) | 0.001 | Total screen time ≥2 ≥2 hours/day (N, %) | 70 (66.0) | 93 (87.7) | < 0.001 | Adherence to Mediterranean diet |  |  |  | KIDMED score | 5.9 (1.8) | 6.4 (1.5) | 0.018 | Low adherence (KIDMED score: < 8) | 86 (81.1) | 81 (76.4) | 0.476 | <b>Overall study quality:</b><br>Low risk<br><b>Conflict of interest</b><br>Stated (none declared)<br><b>Funding:</b><br>Public funds<br><br>+ ethical approval from the Ethics Committee of the Public University of Navarra<br>+ informed consent by parents or legal guardians<br>+ multiple-stage process (random selection of type of school (primary and secondary), region and funding type (public, state funded, private) of school, school-year, classroom)<br>+ outcome measurement with validated questionnaires filled out by pupils<br>+ using t test and Chi² test to investigate differences<br>+ statistical analysis of confounders “sex” and “age” (homogeneous group)<br>+ temporal investigation<br><br>- high lost to follow-up, but drop-out analysis (difference regarding physical activity between responders at T2 |
|                                               | T1<br>(M SD))                                                                                                                                                                                                                                                    | T2<br>(M SD))                                                                                                                                                                                                                                                                                                                                                                                        | p                                                                                                                                                                                                                                                                |                                                                                                                                                                                                                                                                                                                                        |                                                                                                                                                                                                                                                                                                                                                                                                                                                                                                                                                                                                                                                                                                                                                                                                                                                                                                                                                                                                                                                                                                                                                                                                                                                                      |                                                                                                                                                                                                                         |               |                                |   |                   |     |           |      |                                 |          |                                                             |         |             |  |  |  |                         |           |           |         |                             |         |           |       |                                    |         |         |       |                                            |         |         |       |                                        |         |           |       |                                          |           |           |         |                                 |  |  |  |              |           |           |       |                                   |           |           |       |                                                                                                                                                                                                                                                                                                                                                                                                                                                                                                                                                                                                                                                                                                                                                                                                                                               |
| Physical activity                             |                                                                                                                                                                                                                                                                  |                                                                                                                                                                                                                                                                                                                                                                                                      |                                                                                                                                                                                                                                                                  |                                                                                                                                                                                                                                                                                                                                        |                                                                                                                                                                                                                                                                                                                                                                                                                                                                                                                                                                                                                                                                                                                                                                                                                                                                                                                                                                                                                                                                                                                                                                                                                                                                      |                                                                                                                                                                                                                         |               |                                |   |                   |     |           |      |                                 |          |                                                             |         |             |  |  |  |                         |           |           |         |                             |         |           |       |                                    |         |         |       |                                            |         |         |       |                                        |         |           |       |                                          |           |           |         |                                 |  |  |  |              |           |           |       |                                   |           |           |       |                                                                                                                                                                                                                                                                                                                                                                                                                                                                                                                                                                                                                                                                                                                                                                                                                                               |
| Physical activity (minutes/day)               | 154 (40)                                                                                                                                                                                                                                                         | 63 (39)                                                                                                                                                                                                                                                                                                                                                                                              | < 0.001                                                                                                                                                                                                                                                          |                                                                                                                                                                                                                                                                                                                                        |                                                                                                                                                                                                                                                                                                                                                                                                                                                                                                                                                                                                                                                                                                                                                                                                                                                                                                                                                                                                                                                                                                                                                                                                                                                                      |                                                                                                                                                                                                                         |               |                                |   |                   |     |           |      |                                 |          |                                                             |         |             |  |  |  |                         |           |           |         |                             |         |           |       |                                    |         |         |       |                                            |         |         |       |                                        |         |           |       |                                          |           |           |         |                                 |  |  |  |              |           |           |       |                                   |           |           |       |                                                                                                                                                                                                                                                                                                                                                                                                                                                                                                                                                                                                                                                                                                                                                                                                                                               |
| Screen time                                   |                                                                                                                                                                                                                                                                  |                                                                                                                                                                                                                                                                                                                                                                                                      |                                                                                                                                                                                                                                                                  |                                                                                                                                                                                                                                                                                                                                        |                                                                                                                                                                                                                                                                                                                                                                                                                                                                                                                                                                                                                                                                                                                                                                                                                                                                                                                                                                                                                                                                                                                                                                                                                                                                      |                                                                                                                                                                                                                         |               |                                |   |                   |     |           |      |                                 |          |                                                             |         |             |  |  |  |                         |           |           |         |                             |         |           |       |                                    |         |         |       |                                            |         |         |       |                                        |         |           |       |                                          |           |           |         |                                 |  |  |  |              |           |           |       |                                   |           |           |       |                                                                                                                                                                                                                                                                                                                                                                                                                                                                                                                                                                                                                                                                                                                                                                                                                                               |
| Screen time (hours/day)                       | 4.3 (2.4)                                                                                                                                                                                                                                                        | 6.1 (2.4)                                                                                                                                                                                                                                                                                                                                                                                            | < 0.001                                                                                                                                                                                                                                                          |                                                                                                                                                                                                                                                                                                                                        |                                                                                                                                                                                                                                                                                                                                                                                                                                                                                                                                                                                                                                                                                                                                                                                                                                                                                                                                                                                                                                                                                                                                                                                                                                                                      |                                                                                                                                                                                                                         |               |                                |   |                   |     |           |      |                                 |          |                                                             |         |             |  |  |  |                         |           |           |         |                             |         |           |       |                                    |         |         |       |                                            |         |         |       |                                        |         |           |       |                                          |           |           |         |                                 |  |  |  |              |           |           |       |                                   |           |           |       |                                                                                                                                                                                                                                                                                                                                                                                                                                                                                                                                                                                                                                                                                                                                                                                                                                               |
| TV time ≥2 hours/day (N, %)                   | 3 (2.8)                                                                                                                                                                                                                                                          | 14 (13.2)                                                                                                                                                                                                                                                                                                                                                                                            | 0.005                                                                                                                                                                                                                                                            |                                                                                                                                                                                                                                                                                                                                        |                                                                                                                                                                                                                                                                                                                                                                                                                                                                                                                                                                                                                                                                                                                                                                                                                                                                                                                                                                                                                                                                                                                                                                                                                                                                      |                                                                                                                                                                                                                         |               |                                |   |                   |     |           |      |                                 |          |                                                             |         |             |  |  |  |                         |           |           |         |                             |         |           |       |                                    |         |         |       |                                            |         |         |       |                                        |         |           |       |                                          |           |           |         |                                 |  |  |  |              |           |           |       |                                   |           |           |       |                                                                                                                                                                                                                                                                                                                                                                                                                                                                                                                                                                                                                                                                                                                                                                                                                                               |
| Videogame time ≥2 hours/day (N, %)            | 6 (5.7)                                                                                                                                                                                                                                                          | 7 (6.6)                                                                                                                                                                                                                                                                                                                                                                                              | 0.775                                                                                                                                                                                                                                                            |                                                                                                                                                                                                                                                                                                                                        |                                                                                                                                                                                                                                                                                                                                                                                                                                                                                                                                                                                                                                                                                                                                                                                                                                                                                                                                                                                                                                                                                                                                                                                                                                                                      |                                                                                                                                                                                                                         |               |                                |   |                   |     |           |      |                                 |          |                                                             |         |             |  |  |  |                         |           |           |         |                             |         |           |       |                                    |         |         |       |                                            |         |         |       |                                        |         |           |       |                                          |           |           |         |                                 |  |  |  |              |           |           |       |                                   |           |           |       |                                                                                                                                                                                                                                                                                                                                                                                                                                                                                                                                                                                                                                                                                                                                                                                                                                               |
| Computer (no homework) ≥2 hours/day (N, %)    | 1 (0.9)                                                                                                                                                                                                                                                          | 0 (0.0)                                                                                                                                                                                                                                                                                                                                                                                              | 0.316                                                                                                                                                                                                                                                            |                                                                                                                                                                                                                                                                                                                                        |                                                                                                                                                                                                                                                                                                                                                                                                                                                                                                                                                                                                                                                                                                                                                                                                                                                                                                                                                                                                                                                                                                                                                                                                                                                                      |                                                                                                                                                                                                                         |               |                                |   |                   |     |           |      |                                 |          |                                                             |         |             |  |  |  |                         |           |           |         |                             |         |           |       |                                    |         |         |       |                                            |         |         |       |                                        |         |           |       |                                          |           |           |         |                                 |  |  |  |              |           |           |       |                                   |           |           |       |                                                                                                                                                                                                                                                                                                                                                                                                                                                                                                                                                                                                                                                                                                                                                                                                                                               |
| Total mobile-phone ≥2 hours/day (N, %)        | 4 (3.8)                                                                                                                                                                                                                                                          | 20 (18.9)                                                                                                                                                                                                                                                                                                                                                                                            | 0.001                                                                                                                                                                                                                                                            |                                                                                                                                                                                                                                                                                                                                        |                                                                                                                                                                                                                                                                                                                                                                                                                                                                                                                                                                                                                                                                                                                                                                                                                                                                                                                                                                                                                                                                                                                                                                                                                                                                      |                                                                                                                                                                                                                         |               |                                |   |                   |     |           |      |                                 |          |                                                             |         |             |  |  |  |                         |           |           |         |                             |         |           |       |                                    |         |         |       |                                            |         |         |       |                                        |         |           |       |                                          |           |           |         |                                 |  |  |  |              |           |           |       |                                   |           |           |       |                                                                                                                                                                                                                                                                                                                                                                                                                                                                                                                                                                                                                                                                                                                                                                                                                                               |
| Total screen time ≥2 ≥2 hours/day (N, %)      | 70 (66.0)                                                                                                                                                                                                                                                        | 93 (87.7)                                                                                                                                                                                                                                                                                                                                                                                            | < 0.001                                                                                                                                                                                                                                                          |                                                                                                                                                                                                                                                                                                                                        |                                                                                                                                                                                                                                                                                                                                                                                                                                                                                                                                                                                                                                                                                                                                                                                                                                                                                                                                                                                                                                                                                                                                                                                                                                                                      |                                                                                                                                                                                                                         |               |                                |   |                   |     |           |      |                                 |          |                                                             |         |             |  |  |  |                         |           |           |         |                             |         |           |       |                                    |         |         |       |                                            |         |         |       |                                        |         |           |       |                                          |           |           |         |                                 |  |  |  |              |           |           |       |                                   |           |           |       |                                                                                                                                                                                                                                                                                                                                                                                                                                                                                                                                                                                                                                                                                                                                                                                                                                               |
| Adherence to Mediterranean diet               |                                                                                                                                                                                                                                                                  |                                                                                                                                                                                                                                                                                                                                                                                                      |                                                                                                                                                                                                                                                                  |                                                                                                                                                                                                                                                                                                                                        |                                                                                                                                                                                                                                                                                                                                                                                                                                                                                                                                                                                                                                                                                                                                                                                                                                                                                                                                                                                                                                                                                                                                                                                                                                                                      |                                                                                                                                                                                                                         |               |                                |   |                   |     |           |      |                                 |          |                                                             |         |             |  |  |  |                         |           |           |         |                             |         |           |       |                                    |         |         |       |                                            |         |         |       |                                        |         |           |       |                                          |           |           |         |                                 |  |  |  |              |           |           |       |                                   |           |           |       |                                                                                                                                                                                                                                                                                                                                                                                                                                                                                                                                                                                                                                                                                                                                                                                                                                               |
| KIDMED score                                  | 5.9 (1.8)                                                                                                                                                                                                                                                        | 6.4 (1.5)                                                                                                                                                                                                                                                                                                                                                                                            | 0.018                                                                                                                                                                                                                                                            |                                                                                                                                                                                                                                                                                                                                        |                                                                                                                                                                                                                                                                                                                                                                                                                                                                                                                                                                                                                                                                                                                                                                                                                                                                                                                                                                                                                                                                                                                                                                                                                                                                      |                                                                                                                                                                                                                         |               |                                |   |                   |     |           |      |                                 |          |                                                             |         |             |  |  |  |                         |           |           |         |                             |         |           |       |                                    |         |         |       |                                            |         |         |       |                                        |         |           |       |                                          |           |           |         |                                 |  |  |  |              |           |           |       |                                   |           |           |       |                                                                                                                                                                                                                                                                                                                                                                                                                                                                                                                                                                                                                                                                                                                                                                                                                                               |
| Low adherence (KIDMED score: < 8)             | 86 (81.1)                                                                                                                                                                                                                                                        | 81 (76.4)                                                                                                                                                                                                                                                                                                                                                                                            | 0.476                                                                                                                                                                                                                                                            |                                                                                                                                                                                                                                                                                                                                        |                                                                                                                                                                                                                                                                                                                                                                                                                                                                                                                                                                                                                                                                                                                                                                                                                                                                                                                                                                                                                                                                                                                                                                                                                                                                      |                                                                                                                                                                                                                         |               |                                |   |                   |     |           |      |                                 |          |                                                             |         |             |  |  |  |                         |           |           |         |                             |         |           |       |                                    |         |         |       |                                            |         |         |       |                                        |         |           |       |                                          |           |           |         |                                 |  |  |  |              |           |           |       |                                   |           |           |       |                                                                                                                                                                                                                                                                                                                                                                                                                                                                                                                                                                                                                                                                                                                                                                                                                                               |

| Reference<br>(First author, publication year)          | General<br>(Study design<br>Study name<br>Country of study<br>Time of study<br>No. of waves<br>Follow-up duration<br>(e.g., mean, range))                                                        | Population<br>(Description<br>Inclusion criteria<br># invited<br># baseline<br># follow-up<br>Age at baseline<br>% females<br>Response<br>Lost to follow-up)                                     | Exposure<br>(Description & assessment)                                                                                                                              | Outcome<br>(Description & assessment)                                                   | Results<br>(Description of all topically relevant results)                                                                                                                                                                                                                                                                                                                                                                                                                                                                                                                                                                                                                                                                                                                                                                                                                                                                                                                                                                                                                                                                                                                                                                                                                                                                                    | Comments<br>(study quality [overall assessment according to Iljaz/Shamliyan/SIGN/CASP]<br>Conflict of interest [stated vs. not stated]<br>Funding (public, non-profit, commercial)<br>Strengths (+) and weaknesses (-)) |                |                       |      |                 |      |                                         |      |                                                                                                                                                                                                                             |   |                                 |  |                   |       |             |                      |                                     |       |                                                        |  |                   |       |             |       |                                     |       |                                                  |  |                   |       |             |       |                                     |       |                                                                                   |
|--------------------------------------------------------|--------------------------------------------------------------------------------------------------------------------------------------------------------------------------------------------------|--------------------------------------------------------------------------------------------------------------------------------------------------------------------------------------------------|---------------------------------------------------------------------------------------------------------------------------------------------------------------------|-----------------------------------------------------------------------------------------|-----------------------------------------------------------------------------------------------------------------------------------------------------------------------------------------------------------------------------------------------------------------------------------------------------------------------------------------------------------------------------------------------------------------------------------------------------------------------------------------------------------------------------------------------------------------------------------------------------------------------------------------------------------------------------------------------------------------------------------------------------------------------------------------------------------------------------------------------------------------------------------------------------------------------------------------------------------------------------------------------------------------------------------------------------------------------------------------------------------------------------------------------------------------------------------------------------------------------------------------------------------------------------------------------------------------------------------------------|-------------------------------------------------------------------------------------------------------------------------------------------------------------------------------------------------------------------------|----------------|-----------------------|------|-----------------|------|-----------------------------------------|------|-----------------------------------------------------------------------------------------------------------------------------------------------------------------------------------------------------------------------------|---|---------------------------------|--|-------------------|-------|-------------|----------------------|-------------------------------------|-------|--------------------------------------------------------|--|-------------------|-------|-------------|-------|-------------------------------------|-------|--------------------------------------------------|--|-------------------|-------|-------------|-------|-------------------------------------|-------|-----------------------------------------------------------------------------------|
|                                                        |                                                                                                                                                                                                  |                                                                                                                                                                                                  |                                                                                                                                                                     |                                                                                         | <p>t test for continuous variables and Chi<sup>2</sup> test for categorical variables</p> <p><b>Text: Prevalence of worsening of lifestyle behaviours</b></p> <table><tr><th>Worsening of ...</th><th>Prevalence (%)</th></tr><tr><td>... physical activity</td><td>95.2</td></tr><tr><td>... screen time</td><td>69.8</td></tr><tr><td>... adherence to the Mediterranean diet</td><td>31.4</td></tr></table> <p><b>Figures 1 and 2: Changes of lifestyle behaviours according to sex, school grade, and economic status</b></p> <table><tr><th>Differences in ...</th><th>p</th></tr><tr><td colspan="2"><b>... sex (boys vs. girls)</b></td></tr><tr><td>Physical activity</td><td>0.255</td></tr><tr><td>Screen time</td><td>0.020 (boys &gt; girls)</td></tr><tr><td>Adherence to the Mediterranean diet</td><td>0.925</td></tr><tr><td colspan="2"><b>... school grade (primary vs. secondary school)</b></td></tr><tr><td>Physical activity</td><td>0.795</td></tr><tr><td>Screen time</td><td>0.694</td></tr><tr><td>Adherence to the Mediterranean diet</td><td>0.916</td></tr><tr><td colspan="2"><b>... economic status (low/medium vs. high)</b></td></tr><tr><td>Physical activity</td><td>0.152</td></tr><tr><td>Screen time</td><td>0.825</td></tr><tr><td>Adherence to the Mediterranean diet</td><td>0.598</td></tr></table> | Worsening of ...                                                                                                                                                                                                        | Prevalence (%) | ... physical activity | 95.2 | ... screen time | 69.8 | ... adherence to the Mediterranean diet | 31.4 | Differences in ...                                                                                                                                                                                                          | p | <b>... sex (boys vs. girls)</b> |  | Physical activity | 0.255 | Screen time | 0.020 (boys > girls) | Adherence to the Mediterranean diet | 0.925 | <b>... school grade (primary vs. secondary school)</b> |  | Physical activity | 0.795 | Screen time | 0.694 | Adherence to the Mediterranean diet | 0.916 | <b>... economic status (low/medium vs. high)</b> |  | Physical activity | 0.152 | Screen time | 0.825 | Adherence to the Mediterranean diet | 0.598 | and drop-outs, but not regarding screen time and adherence to Mediterranean diet) |
| Worsening of ...                                       | Prevalence (%)                                                                                                                                                                                   |                                                                                                                                                                                                  |                                                                                                                                                                     |                                                                                         |                                                                                                                                                                                                                                                                                                                                                                                                                                                                                                                                                                                                                                                                                                                                                                                                                                                                                                                                                                                                                                                                                                                                                                                                                                                                                                                                               |                                                                                                                                                                                                                         |                |                       |      |                 |      |                                         |      |                                                                                                                                                                                                                             |   |                                 |  |                   |       |             |                      |                                     |       |                                                        |  |                   |       |             |       |                                     |       |                                                  |  |                   |       |             |       |                                     |       |                                                                                   |
| ... physical activity                                  | 95.2                                                                                                                                                                                             |                                                                                                                                                                                                  |                                                                                                                                                                     |                                                                                         |                                                                                                                                                                                                                                                                                                                                                                                                                                                                                                                                                                                                                                                                                                                                                                                                                                                                                                                                                                                                                                                                                                                                                                                                                                                                                                                                               |                                                                                                                                                                                                                         |                |                       |      |                 |      |                                         |      |                                                                                                                                                                                                                             |   |                                 |  |                   |       |             |                      |                                     |       |                                                        |  |                   |       |             |       |                                     |       |                                                  |  |                   |       |             |       |                                     |       |                                                                                   |
| ... screen time                                        | 69.8                                                                                                                                                                                             |                                                                                                                                                                                                  |                                                                                                                                                                     |                                                                                         |                                                                                                                                                                                                                                                                                                                                                                                                                                                                                                                                                                                                                                                                                                                                                                                                                                                                                                                                                                                                                                                                                                                                                                                                                                                                                                                                               |                                                                                                                                                                                                                         |                |                       |      |                 |      |                                         |      |                                                                                                                                                                                                                             |   |                                 |  |                   |       |             |                      |                                     |       |                                                        |  |                   |       |             |       |                                     |       |                                                  |  |                   |       |             |       |                                     |       |                                                                                   |
| ... adherence to the Mediterranean diet                | 31.4                                                                                                                                                                                             |                                                                                                                                                                                                  |                                                                                                                                                                     |                                                                                         |                                                                                                                                                                                                                                                                                                                                                                                                                                                                                                                                                                                                                                                                                                                                                                                                                                                                                                                                                                                                                                                                                                                                                                                                                                                                                                                                               |                                                                                                                                                                                                                         |                |                       |      |                 |      |                                         |      |                                                                                                                                                                                                                             |   |                                 |  |                   |       |             |                      |                                     |       |                                                        |  |                   |       |             |       |                                     |       |                                                  |  |                   |       |             |       |                                     |       |                                                                                   |
| Differences in ...                                     | p                                                                                                                                                                                                |                                                                                                                                                                                                  |                                                                                                                                                                     |                                                                                         |                                                                                                                                                                                                                                                                                                                                                                                                                                                                                                                                                                                                                                                                                                                                                                                                                                                                                                                                                                                                                                                                                                                                                                                                                                                                                                                                               |                                                                                                                                                                                                                         |                |                       |      |                 |      |                                         |      |                                                                                                                                                                                                                             |   |                                 |  |                   |       |             |                      |                                     |       |                                                        |  |                   |       |             |       |                                     |       |                                                  |  |                   |       |             |       |                                     |       |                                                                                   |
| <b>... sex (boys vs. girls)</b>                        |                                                                                                                                                                                                  |                                                                                                                                                                                                  |                                                                                                                                                                     |                                                                                         |                                                                                                                                                                                                                                                                                                                                                                                                                                                                                                                                                                                                                                                                                                                                                                                                                                                                                                                                                                                                                                                                                                                                                                                                                                                                                                                                               |                                                                                                                                                                                                                         |                |                       |      |                 |      |                                         |      |                                                                                                                                                                                                                             |   |                                 |  |                   |       |             |                      |                                     |       |                                                        |  |                   |       |             |       |                                     |       |                                                  |  |                   |       |             |       |                                     |       |                                                                                   |
| Physical activity                                      | 0.255                                                                                                                                                                                            |                                                                                                                                                                                                  |                                                                                                                                                                     |                                                                                         |                                                                                                                                                                                                                                                                                                                                                                                                                                                                                                                                                                                                                                                                                                                                                                                                                                                                                                                                                                                                                                                                                                                                                                                                                                                                                                                                               |                                                                                                                                                                                                                         |                |                       |      |                 |      |                                         |      |                                                                                                                                                                                                                             |   |                                 |  |                   |       |             |                      |                                     |       |                                                        |  |                   |       |             |       |                                     |       |                                                  |  |                   |       |             |       |                                     |       |                                                                                   |
| Screen time                                            | 0.020 (boys > girls)                                                                                                                                                                             |                                                                                                                                                                                                  |                                                                                                                                                                     |                                                                                         |                                                                                                                                                                                                                                                                                                                                                                                                                                                                                                                                                                                                                                                                                                                                                                                                                                                                                                                                                                                                                                                                                                                                                                                                                                                                                                                                               |                                                                                                                                                                                                                         |                |                       |      |                 |      |                                         |      |                                                                                                                                                                                                                             |   |                                 |  |                   |       |             |                      |                                     |       |                                                        |  |                   |       |             |       |                                     |       |                                                  |  |                   |       |             |       |                                     |       |                                                                                   |
| Adherence to the Mediterranean diet                    | 0.925                                                                                                                                                                                            |                                                                                                                                                                                                  |                                                                                                                                                                     |                                                                                         |                                                                                                                                                                                                                                                                                                                                                                                                                                                                                                                                                                                                                                                                                                                                                                                                                                                                                                                                                                                                                                                                                                                                                                                                                                                                                                                                               |                                                                                                                                                                                                                         |                |                       |      |                 |      |                                         |      |                                                                                                                                                                                                                             |   |                                 |  |                   |       |             |                      |                                     |       |                                                        |  |                   |       |             |       |                                     |       |                                                  |  |                   |       |             |       |                                     |       |                                                                                   |
| <b>... school grade (primary vs. secondary school)</b> |                                                                                                                                                                                                  |                                                                                                                                                                                                  |                                                                                                                                                                     |                                                                                         |                                                                                                                                                                                                                                                                                                                                                                                                                                                                                                                                                                                                                                                                                                                                                                                                                                                                                                                                                                                                                                                                                                                                                                                                                                                                                                                                               |                                                                                                                                                                                                                         |                |                       |      |                 |      |                                         |      |                                                                                                                                                                                                                             |   |                                 |  |                   |       |             |                      |                                     |       |                                                        |  |                   |       |             |       |                                     |       |                                                  |  |                   |       |             |       |                                     |       |                                                                                   |
| Physical activity                                      | 0.795                                                                                                                                                                                            |                                                                                                                                                                                                  |                                                                                                                                                                     |                                                                                         |                                                                                                                                                                                                                                                                                                                                                                                                                                                                                                                                                                                                                                                                                                                                                                                                                                                                                                                                                                                                                                                                                                                                                                                                                                                                                                                                               |                                                                                                                                                                                                                         |                |                       |      |                 |      |                                         |      |                                                                                                                                                                                                                             |   |                                 |  |                   |       |             |                      |                                     |       |                                                        |  |                   |       |             |       |                                     |       |                                                  |  |                   |       |             |       |                                     |       |                                                                                   |
| Screen time                                            | 0.694                                                                                                                                                                                            |                                                                                                                                                                                                  |                                                                                                                                                                     |                                                                                         |                                                                                                                                                                                                                                                                                                                                                                                                                                                                                                                                                                                                                                                                                                                                                                                                                                                                                                                                                                                                                                                                                                                                                                                                                                                                                                                                               |                                                                                                                                                                                                                         |                |                       |      |                 |      |                                         |      |                                                                                                                                                                                                                             |   |                                 |  |                   |       |             |                      |                                     |       |                                                        |  |                   |       |             |       |                                     |       |                                                  |  |                   |       |             |       |                                     |       |                                                                                   |
[truncated: 796,292 more chars]
